# Supplementary material
Source: publisher figshare collection journal article supplement (https://acs.figshare.com/ndownloader/files/5960151)
Supplement: Supplementary file 1 [file 5960151]

 
data_shelx
 
_audit_creation_method            SHELXL-2014
_chemical_name_systematic
;
 ?
;
_chemical_name_common             ?
_chemical_melting_point           ?
_chemical_formula_moiety          ?
_chemical_formula_sum
 'C25 H27 O6' 
_chemical_formula_weight          423.46

loop_
 _atom_type_symbol
 _atom_type_description
 _atom_type_scat_dispersion_real
 _atom_type_scat_dispersion_imag
 _atom_type_scat_source
 'C'  'C'   0.0181   0.0091
 'International Tables Vol C Tables 4.2.6.8 and 6.1.1.4'
 'H'  'H'   0.0000   0.0000
 'International Tables Vol C Tables 4.2.6.8 and 6.1.1.4'
 'O'  'O'   0.0492   0.0322
 'International Tables Vol C Tables 4.2.6.8 and 6.1.1.4'
 
_space_group_crystal_system       monoclinic
_space_group_IT_number            14
_space_group_name_H-M_alt         'P 21/c'
_space_group_name_Hall            '-P 2ybc'
 
_shelx_space_group_comment
;
The symmetry employed for this shelxl refinement is uniquely defined
by the following loop, which should always be used as a source of
symmetry information in preference to the above space-group names.
They are only intended as comments.
;
 
loop_
 _space_group_symop_operation_xyz
 'x, y, z'
 '-x, y+1/2, -z+1/2'
 '-x, -y, -z'
 'x, -y-1/2, z-1/2'
 
_cell_length_a                    11.4810(2)
_cell_length_b                    13.8874(3)
_cell_length_c                    14.2299(10)
_cell_angle_alpha                 90
_cell_angle_beta                  111.405(8)
_cell_angle_gamma                 90
_cell_volume                      2112.34(19)
_cell_formula_units_Z             4
_cell_measurement_temperature     293(2)
_cell_measurement_reflns_used     18683  
_cell_measurement_theta_min       6.70  
_cell_measurement_theta_max       69.00  
 
_exptl_crystal_description        block  
_exptl_crystal_colour             colorless  
_exptl_crystal_density_meas       ? 
_exptl_crystal_density_method     ?              
_exptl_crystal_density_diffrn     1.332          
_exptl_crystal_F_000              900
_exptl_transmission_factor_min    ?                                             
_exptl_transmission_factor_max    ?                                             
_exptl_crystal_size_max           0.20  
_exptl_crystal_size_mid           0.20  
_exptl_crystal_size_min           0.20  
_exptl_absorpt_coefficient_mu     0.774
_shelx_estimated_absorpt_T_min    ? 
_shelx_estimated_absorpt_T_max    ? 
_exptl_absorpt_correction_type    multi-scan  
_exptl_absorpt_correction_T_min   0.618  
_exptl_absorpt_correction_T_max   0.856  
_exptl_absorpt_process_details    'Jacobson, R. (1998) Private communication' 
 
_exptl_special_details
;
 ?
;
 
_diffrn_ambient_temperature       293(2)
_diffrn_radiation_wavelength      1.54187
_diffrn_radiation_type            CuK\a
_diffrn_source                    ?                       
_diffrn_measurement_device_type   'Rigaku Saturn944+ CCD' 
_diffrn_measurement_method        \w  
_diffrn_detector_area_resol_mean  ? 
_diffrn_reflns_number             23486
_diffrn_reflns_av_unetI/netI      0.0259
_diffrn_reflns_av_R_equivalents   0.0374
_diffrn_reflns_limit_h_min        -13
_diffrn_reflns_limit_h_max        13
_diffrn_reflns_limit_k_min        -16
_diffrn_reflns_limit_k_max        15
_diffrn_reflns_limit_l_min        -17
_diffrn_reflns_limit_l_max        16
_diffrn_reflns_theta_min          6.972
_diffrn_reflns_theta_max          68.957
_diffrn_reflns_theta_full         67.687
_diffrn_measured_fraction_theta_max   0.984
_diffrn_measured_fraction_theta_full  0.992
_diffrn_reflns_Laue_measured_fraction_max    0.984
_diffrn_reflns_Laue_measured_fraction_full   0.992
_diffrn_reflns_point_group_measured_fraction_max   0.984
_diffrn_reflns_point_group_measured_fraction_full  0.992
_reflns_number_total              3866
_reflns_number_gt                 3531
_reflns_threshold_expression      'I > 2\s(I)'
_reflns_Friedel_coverage          0.000
_reflns_Friedel_fraction_max      .
_reflns_Friedel_fraction_full     .
 
_reflns_special_details
;
 Reflections were merged by SHELXL according to the crystal
 class for the calculation of statistics and refinement.
 
 _reflns_Friedel_fraction is defined as the number of unique
 Friedel pairs measured divided by the number that would be
 possible theoretically, ignoring centric projections and
 systematic absences.
;
 
_computing_data_collection        'CrystalClear-SM 2.0 r4 (Rigaku, 2009)'
_computing_cell_refinement        'CrystalClear-SM Auto 2.0 r4'
_computing_data_reduction         'CrystalClear-SM Auto 2.0 r4'
_computing_structure_solution     'SHELXS97 (Sheldrick, 1997)'
_computing_structure_refinement   'SHELXL-2014 (Sheldrick, 2014)'
_computing_molecular_graphics     'CrystalStructure 4.0'
_computing_publication_material   'CrystalStructure 4.0 (Rigaku, 2009)'
 
_refine_special_details
;
 ?
;
_refine_ls_structure_factor_coef  Fsqd
_refine_ls_matrix_type            full
_refine_ls_weighting_scheme       calc
_refine_ls_weighting_details
'w=1/[\s^2^(Fo^2^)+(0.0719P)^2^+1.1024P] where P=(Fo^2^+2Fc^2^)/3'
_atom_sites_solution_primary      ?
_atom_sites_solution_secondary    ?
_atom_sites_solution_hydrogens    geom
_refine_ls_hydrogen_treatment     constr
_refine_ls_extinction_method      none
_refine_ls_extinction_coef        .
_refine_ls_number_reflns          3866
_refine_ls_number_parameters      285
_refine_ls_number_restraints      0
_refine_ls_R_factor_all           0.0588
_refine_ls_R_factor_gt            0.0556
_refine_ls_wR_factor_ref          0.1473
_refine_ls_wR_factor_gt           0.1445
_refine_ls_goodness_of_fit_ref    1.063
_refine_ls_restrained_S_all       1.063
_refine_ls_shift/su_max           0.000
_refine_ls_shift/su_mean          0.000
 
loop_
 _atom_site_label
 _atom_site_type_symbol
 _atom_site_fract_x
 _atom_site_fract_y
 _atom_site_fract_z
 _atom_site_U_iso_or_equiv
 _atom_site_adp_type
 _atom_site_occupancy
 _atom_site_site_symmetry_order  
 _atom_site_calc_flag
 _atom_site_refinement_flags_posn
 _atom_site_refinement_flags_adp
 _atom_site_refinement_flags_occupancy
 _atom_site_disorder_assembly
 _atom_site_disorder_group
O1 O 0.0379(2) 0.63967(13) 0.61167(13) 0.0801(6) Uani 1 1 d . . . . .
O2 O 0.28851(16) -0.07204(10) 0.73276(14) 0.0602(4) Uani 1 1 d . . . . .
O3 O 0.11838(14) 0.67024(10) 0.77355(12) 0.0511(4) Uani 1 1 d . . . . .
O4 O 0.35498(11) 0.35883(9) 0.87275(10) 0.0378(3) Uani 1 1 d . . . . .
O5 O 0.47116(12) 0.22690(11) 0.88598(12) 0.0521(4) Uani 1 1 d . . . . .
O6 O 0.14712(14) 0.08357(10) 0.71733(12) 0.0532(4) Uani 1 1 d . . . . .
C1 C 0.0842(2) 0.60779(15) 0.69547(17) 0.0492(5) Uani 1 1 d . . . . .
C2 C 0.11135(18) 0.50399(13) 0.71826(14) 0.0384(4) Uani 1 1 d . . . . .
C3 C 0.04822(19) 0.43079(14) 0.63742(14) 0.0431(5) Uani 1 1 d . . . . .
H3 H 0.0532 0.4544 0.5741 0.052 Uiso 1 1 calc R U . . .
C4 C 0.11926(18) 0.33567(13) 0.66305(14) 0.0390(4) Uani 1 1 d . . . . .
H4A H 0.1970 0.3426 0.6514 0.047 Uiso 1 1 calc R U . . .
H4B H 0.0700 0.2866 0.6171 0.047 Uiso 1 1 calc R U . . .
C5 C 0.14981(16) 0.30037(12) 0.77193(13) 0.0325(4) Uani 1 1 d . . . . .
H5 H 0.0745 0.2784 0.7826 0.039 Uiso 1 1 calc R U . . .
C6 C 0.24865(16) 0.22305(13) 0.79848(13) 0.0350(4) Uani 1 1 d . . . . .
C7 C 0.24402(17) 0.12387(13) 0.76909(14) 0.0372(4) Uani 1 1 d . . . . .
C8 C 0.37021(19) 0.07694(14) 0.80743(15) 0.0437(5) Uani 1 1 d . . . . .
C9 C 0.3906(2) -0.02119(16) 0.78936(18) 0.0536(5) Uani 1 1 d . . . . .
C10 C 0.3035(3) -0.16933(18) 0.7086(3) 0.0865(10) Uani 1 1 d . . . . .
H10A H 0.3323 -0.2070 0.7694 0.130 Uiso 1 1 calc R U . . .
H10B H 0.3637 -0.1727 0.6763 0.130 Uiso 1 1 calc R U . . .
H10C H 0.2247 -0.1941 0.6639 0.130 Uiso 1 1 calc R U . . .
C11 C 0.1514(2) 0.63159(15) 0.87448(16) 0.0476(5) Uani 1 1 d . . . . .
H11A H 0.0767 0.6072 0.8831 0.057 Uiso 1 1 calc R U . . .
H11B H 0.1855 0.6826 0.9234 0.057 Uiso 1 1 calc R U . . .
C12 C 0.24657(17) 0.55121(13) 0.89391(15) 0.0400(4) Uani 1 1 d . . . . .
C13 C 0.3730(2) 0.59085(16) 0.89797(19) 0.0547(6) Uani 1 1 d . . . . .
H13A H 0.3614 0.6271 0.8378 0.082 Uiso 1 1 calc R U . . .
H13B H 0.4293 0.5383 0.9028 0.082 Uiso 1 1 calc R U . . .
H13C H 0.4074 0.6319 0.9558 0.082 Uiso 1 1 calc R U . . .
C14 C 0.2582(2) 0.49001(15) 0.98746(15) 0.0461(5) Uani 1 1 d . . . . .
H14A H 0.2145 0.5210 1.0260 0.055 Uiso 1 1 calc R U . . .
H14B H 0.3455 0.4830 1.0305 0.055 Uiso 1 1 calc R U . . .
C15 C 0.19958(18) 0.38918(14) 0.95000(14) 0.0395(4) Uani 1 1 d . . . . .
C16 C 0.2649(2) 0.31009(17) 1.02525(16) 0.0559(6) Uani 1 1 d . . . . .
H16A H 0.2272 0.2491 0.9999 0.084 Uiso 1 1 calc R U . . .
H16B H 0.2565 0.3230 1.0888 0.084 Uiso 1 1 calc R U . . .
H16C H 0.3519 0.3084 1.0345 0.084 Uiso 1 1 calc R U . . .
C17 C 0.21796(15) 0.37999(12) 0.84763(13) 0.0318(4) Uani 1 1 d . . . . .
C18 C 0.35758(17) 0.26594(13) 0.85120(14) 0.0376(4) Uani 1 1 d . . . . .
C19 C 0.4766(2) 0.12959(16) 0.86348(18) 0.0533(5) Uani 1 1 d . . . . .
C20 C -0.0897(2) 0.41989(18) 0.62162(19) 0.0597(6) Uani 1 1 d . . . . .
H20A H -0.1306 0.4812 0.6041 0.090 Uiso 1 1 calc R U . . .
H20B H -0.0974 0.3968 0.6827 0.090 Uiso 1 1 calc R U . . .
H20C H -0.1281 0.3748 0.5681 0.090 Uiso 1 1 calc R U . . .
C21 C 0.19276(16) 0.48039(12) 0.80862(13) 0.0329(4) Uani 1 1 d . . . . .
H21 H 0.2653 0.4829 0.7879 0.039 Uiso 1 1 calc R U . . .
C22 C 0.5105(3) -0.0595(2) 0.8288(3) 0.0831(9) Uani 1 1 d . . . . .
H22 H 0.5231 -0.1239 0.8171 0.100 Uiso 1 1 calc R U . . .
C23 C 0.6107(3) -0.0038(3) 0.8847(3) 0.1035(13) Uani 1 1 d . . . . .
H23 H 0.6899 -0.0313 0.9109 0.124 Uiso 1 1 calc R U . . .
C24 C 0.5959(3) 0.0919(2) 0.9026(3) 0.0849(10) Uani 1 1 d . . . . .
H24 H 0.6639 0.1299 0.9397 0.102 Uiso 1 1 calc R U . . .
C25 C 0.0593(2) 0.39003(16) 0.93288(17) 0.0496(5) Uani 1 1 d . . . . .
H25A H 0.0486 0.4069 0.9947 0.074 Uiso 1 1 calc R U . . .
H25B H 0.0246 0.3273 0.9116 0.074 Uiso 1 1 calc R U . . .
H25C H 0.0173 0.4364 0.8817 0.074 Uiso 1 1 calc R U . . .
 
loop_
 _atom_site_aniso_label
 _atom_site_aniso_U_11
 _atom_site_aniso_U_22
 _atom_site_aniso_U_33
 _atom_site_aniso_U_23
 _atom_site_aniso_U_13
 _atom_site_aniso_U_12
O1 0.1216(17) 0.0465(9) 0.0551(10) 0.0148(8) 0.0119(10) 0.0192(10)
O2 0.0655(10) 0.0330(8) 0.0869(12) -0.0056(7) 0.0336(9) 0.0054(7)
O3 0.0537(9) 0.0301(7) 0.0610(9) 0.0005(6) 0.0107(7) 0.0043(6)
O4 0.0288(6) 0.0335(7) 0.0470(7) -0.0027(5) 0.0089(5) 0.0001(5)
O5 0.0324(7) 0.0464(8) 0.0679(9) -0.0076(7) 0.0071(6) 0.0071(6)
O6 0.0441(8) 0.0348(7) 0.0731(10) -0.0076(7) 0.0123(7) -0.0005(6)
C1 0.0535(12) 0.0348(10) 0.0523(12) 0.0042(9) 0.0112(9) 0.0057(9)
C2 0.0399(10) 0.0325(9) 0.0408(10) 0.0011(8) 0.0122(8) 0.0029(7)
C3 0.0498(11) 0.0372(10) 0.0348(9) 0.0012(8) 0.0067(8) 0.0063(8)
C4 0.0425(10) 0.0354(10) 0.0360(9) -0.0031(7) 0.0106(8) 0.0039(8)
C5 0.0300(8) 0.0271(8) 0.0384(9) -0.0016(7) 0.0102(7) 0.0011(7)
C6 0.0333(9) 0.0313(9) 0.0396(9) 0.0019(7) 0.0124(7) 0.0029(7)
C7 0.0396(10) 0.0319(9) 0.0402(9) 0.0025(7) 0.0147(8) 0.0017(7)
C8 0.0458(11) 0.0377(10) 0.0484(11) 0.0033(8) 0.0180(9) 0.0098(8)
C9 0.0571(13) 0.0391(11) 0.0667(14) 0.0020(10) 0.0252(11) 0.0111(10)
C10 0.087(2) 0.0340(12) 0.142(3) -0.0093(15) 0.046(2) 0.0054(12)
C11 0.0476(11) 0.0368(10) 0.0511(11) -0.0099(9) 0.0093(9) 0.0027(8)
C12 0.0363(10) 0.0320(9) 0.0450(10) -0.0052(8) 0.0069(8) -0.0016(7)
C13 0.0397(11) 0.0442(11) 0.0706(14) -0.0019(10) 0.0089(10) -0.0076(9)
C14 0.0487(11) 0.0450(11) 0.0389(10) -0.0085(8) 0.0092(9) -0.0008(9)
C15 0.0449(10) 0.0380(10) 0.0367(9) -0.0005(8) 0.0164(8) 0.0014(8)
C16 0.0765(16) 0.0524(13) 0.0418(11) 0.0108(10) 0.0254(11) 0.0082(11)
C17 0.0273(8) 0.0309(9) 0.0356(9) 0.0003(7) 0.0093(7) 0.0012(6)
C18 0.0321(9) 0.0360(10) 0.0427(10) 0.0014(8) 0.0113(7) 0.0053(7)
C19 0.0440(11) 0.0456(12) 0.0644(13) -0.0041(10) 0.0128(10) 0.0127(9)
C20 0.0417(11) 0.0533(13) 0.0654(14) -0.0121(11) -0.0025(10) 0.0085(10)
C21 0.0294(8) 0.0301(9) 0.0404(9) -0.0007(7) 0.0142(7) -0.0005(7)
C22 0.0731(18) 0.0526(15) 0.114(2) -0.0078(15) 0.0226(17) 0.0305(14)
C23 0.0587(17) 0.084(2) 0.139(3) -0.024(2) 0.0015(18) 0.0387(16)
C24 0.0462(14) 0.0743(18) 0.112(2) -0.0205(17) 0.0019(14) 0.0237(13)
C25 0.0507(12) 0.0517(12) 0.0550(12) -0.0076(10) 0.0295(10) -0.0035(10)
 
_geom_special_details
;
 All esds (except the esd in the dihedral angle between two l.s. planes)
 are estimated using the full covariance matrix.  The cell esds are taken
 into account individually in the estimation of esds in distances, angles
 and torsion angles; correlations between esds in cell parameters are only
 used when they are defined by crystal symmetry.  An approximate (isotropic)
 treatment of cell esds is used for estimating esds involving l.s. planes.
;
 
loop_
 _geom_bond_atom_site_label_1
 _geom_bond_atom_site_label_2
 _geom_bond_distance
 _geom_bond_site_symmetry_2
 _geom_bond_publ_flag
O1 C1 1.199(3) . ?
O2 C9 1.354(3) . ?
O2 C10 1.420(3) . ?
O3 C1 1.350(3) . ?
O3 C11 1.448(3) . ?
O4 C18 1.329(2) . ?
O4 C17 1.5095(19) . ?
O5 C18 1.330(2) . ?
O5 C19 1.395(3) . ?
O6 C7 1.223(2) . ?
C1 C2 1.485(3) . ?
C2 C21 1.326(3) . ?
C2 C3 1.508(3) . ?
C3 C20 1.524(3) . ?
C3 C4 1.525(3) . ?
C3 H3 0.9800 . ?
C4 C5 1.539(3) . ?
C4 H4A 0.9700 . ?
C4 H4B 0.9700 . ?
C5 C6 1.507(2) . ?
C5 C17 1.543(2) . ?
C5 H5 0.9800 . ?
C6 C18 1.340(3) . ?
C6 C7 1.435(3) . ?
C7 C8 1.498(3) . ?
C8 C19 1.397(3) . ?
C8 C9 1.422(3) . ?
C9 C22 1.388(4) . ?
C10 H10A 0.9600 . ?
C10 H10B 0.9600 . ?
C10 H10C 0.9600 . ?
C11 C12 1.516(3) . ?
C11 H11A 0.9700 . ?
C11 H11B 0.9700 . ?
C12 C21 1.508(2) . ?
C12 C13 1.534(3) . ?
C12 C14 1.543(3) . ?
C13 H13A 0.9600 . ?
C13 H13B 0.9600 . ?
C13 H13C 0.9600 . ?
C14 C15 1.561(3) . ?
C14 H14A 0.9700 . ?
C14 H14B 0.9700 . ?
C15 C16 1.526(3) . ?
C15 C25 1.538(3) . ?
C15 C17 1.552(2) . ?
C16 H16A 0.9600 . ?
C16 H16B 0.9600 . ?
C16 H16C 0.9600 . ?
C17 C21 1.490(2) . ?
C19 C24 1.380(3) . ?
C20 H20A 0.9600 . ?
C20 H20B 0.9600 . ?
C20 H20C 0.9600 . ?
C21 H21 0.9800 . ?
C22 C23 1.373(5) . ?
C22 H22 0.9300 . ?
C23 C24 1.376(4) . ?
C23 H23 0.9300 . ?
C24 H24 0.9300 . ?
C25 H25A 0.9600 . ?
C25 H25B 0.9600 . ?
C25 H25C 0.9600 . ?
 
loop_
 _geom_angle_atom_site_label_1
 _geom_angle_atom_site_label_2
 _geom_angle_atom_site_label_3
 _geom_angle
 _geom_angle_site_symmetry_1
 _geom_angle_site_symmetry_3
 _geom_angle_publ_flag
C9 O2 C10 119.0(2) . . ?
C1 O3 C11 118.06(15) . . ?
C18 O4 C17 104.10(13) . . ?
C18 O5 C19 115.42(16) . . ?
O1 C1 O3 118.13(19) . . ?
O1 C1 C2 123.8(2) . . ?
O3 C1 C2 117.97(18) . . ?
C21 C2 C1 117.98(17) . . ?
C21 C2 C3 123.08(17) . . ?
C1 C2 C3 118.92(17) . . ?
C2 C3 C20 111.34(17) . . ?
C2 C3 C4 109.59(15) . . ?
C20 C3 C4 112.68(18) . . ?
C2 C3 H3 107.7 . . ?
C20 C3 H3 107.7 . . ?
C4 C3 H3 107.7 . . ?
C3 C4 C5 114.97(15) . . ?
C3 C4 H4A 108.5 . . ?
C5 C4 H4A 108.5 . . ?
C3 C4 H4B 108.5 . . ?
C5 C4 H4B 108.5 . . ?
H4A C4 H4B 107.5 . . ?
C6 C5 C4 110.70(14) . . ?
C6 C5 C17 101.07(13) . . ?
C4 C5 C17 110.24(14) . . ?
C6 C5 H5 111.5 . . ?
C4 C5 H5 111.5 . . ?
C17 C5 H5 111.5 . . ?
C18 C6 C7 121.16(16) . . ?
C18 C6 C5 106.68(15) . . ?
C7 C6 C5 131.81(16) . . ?
O6 C7 C6 122.94(17) . . ?
O6 C7 C8 124.51(17) . . ?
C6 C7 C8 112.55(16) . . ?
C19 C8 C9 115.94(19) . . ?
C19 C8 C7 120.52(18) . . ?
C9 C8 C7 123.54(19) . . ?
O2 C9 C22 123.8(2) . . ?
O2 C9 C8 116.31(19) . . ?
C22 C9 C8 119.9(2) . . ?
O2 C10 H10A 109.5 . . ?
O2 C10 H10B 109.5 . . ?
H10A C10 H10B 109.5 . . ?
O2 C10 H10C 109.5 . . ?
H10A C10 H10C 109.5 . . ?
H10B C10 H10C 109.5 . . ?
O3 C11 C12 111.35(17) . . ?
O3 C11 H11A 109.4 . . ?
C12 C11 H11A 109.4 . . ?
O3 C11 H11B 109.4 . . ?
C12 C11 H11B 109.4 . . ?
H11A C11 H11B 108.0 . . ?
C21 C12 C11 106.09(15) . . ?
C21 C12 C13 111.62(17) . . ?
C11 C12 C13 110.62(17) . . ?
C21 C12 C14 102.48(15) . . ?
C11 C12 C14 113.12(18) . . ?
C13 C12 C14 112.47(16) . . ?
C12 C13 H13A 109.5 . . ?
C12 C13 H13B 109.5 . . ?
H13A C13 H13B 109.5 . . ?
C12 C13 H13C 109.5 . . ?
H13A C13 H13C 109.5 . . ?
H13B C13 H13C 109.5 . . ?
C12 C14 C15 107.98(15) . . ?
C12 C14 H14A 110.1 . . ?
C15 C14 H14A 110.1 . . ?
C12 C14 H14B 110.1 . . ?
C15 C14 H14B 110.1 . . ?
H14A C14 H14B 108.4 . . ?
C16 C15 C25 109.53(17) . . ?
C16 C15 C17 113.54(16) . . ?
C25 C15 C17 110.19(15) . . ?
C16 C15 C14 111.46(17) . . ?
C25 C15 C14 110.09(16) . . ?
C17 C15 C14 101.82(15) . . ?
C15 C16 H16A 109.5 . . ?
C15 C16 H16B 109.5 . . ?
H16A C16 H16B 109.5 . . ?
C15 C16 H16C 109.5 . . ?
H16A C16 H16C 109.5 . . ?
H16B C16 H16C 109.5 . . ?
C21 C17 O4 108.33(13) . . ?
C21 C17 C5 115.51(14) . . ?
O4 C17 C5 104.18(13) . . ?
C21 C17 C15 101.44(14) . . ?
O4 C17 C15 106.31(13) . . ?
C5 C17 C15 120.42(15) . . ?
O4 C18 O5 114.30(16) . . ?
O4 C18 C6 117.75(16) . . ?
O5 C18 C6 127.95(18) . . ?
C24 C19 O5 113.3(2) . . ?
C24 C19 C8 124.4(2) . . ?
O5 C19 C8 122.35(18) . . ?
C3 C20 H20A 109.5 . . ?
C3 C20 H20B 109.5 . . ?
H20A C20 H20B 109.5 . . ?
C3 C20 H20C 109.5 . . ?
H20A C20 H20C 109.5 . . ?
H20B C20 H20C 109.5 . . ?
C2 C21 C17 124.42(16) . . ?
C2 C21 C12 123.79(16) . . ?
C17 C21 C12 110.10(15) . . ?
C2 C21 H21 94.3 . . ?
C17 C21 H21 94.3 . . ?
C12 C21 H21 94.3 . . ?
C23 C22 C9 121.0(2) . . ?
C23 C22 H22 119.5 . . ?
C9 C22 H22 119.5 . . ?
C22 C23 C24 121.2(3) . . ?
C22 C23 H23 119.4 . . ?
C24 C23 H23 119.4 . . ?
C23 C24 C19 117.6(3) . . ?
C23 C24 H24 121.2 . . ?
C19 C24 H24 121.2 . . ?
C15 C25 H25A 109.5 . . ?
C15 C25 H25B 109.5 . . ?
H25A C25 H25B 109.5 . . ?
C15 C25 H25C 109.5 . . ?
H25A C25 H25C 109.5 . . ?
H25B C25 H25C 109.5 . . ?
 
loop_
 _geom_hbond_atom_site_label_D 
 _geom_hbond_atom_site_label_H 
 _geom_hbond_atom_site_label_A 
 _geom_hbond_distance_DH 
 _geom_hbond_distance_HA 
 _geom_hbond_distance_DA 
 _geom_hbond_angle_DHA 
 _geom_hbond_site_symmetry_A 
C5 H5 O3  0.98 2.55 3.422(2) 148.1 2_546
C11 H11A O6  0.97 2.46 3.260(3) 139.1 2_556
 
_refine_diff_density_max    0.242
_refine_diff_density_min   -0.670
_refine_diff_density_rms    0.055

_shelxl_version_number 2014-3

_shelx_res_file
;
TITL _qiaochuang20150108
CELL 1.54187 11.4810 13.8874 14.2299 90.000 111.405 90.000
ZERR 4.00 0.0002 0.0003 0.0010 0.000 0.008 0.000
LATT 1
SYMM -x, y+1/2, -z+1/2
SFAC C H O
UNIT 100 108 24
omit       -2   1   1
omit        0   0   2
omit       -2   0   4
omit       -2   1   3
omit        2   5   2
omit       -1   1   3
omit        2   1   3
omit       -1   3   3
omit        1   5   0
omit       -4   1   3
omit       -4   1   7
omit        0   2   2
omit       -1   2   3
omit        0   4   3
omit       -4   0   2
omit       -1   4   1
omit       -1   1   2
omit       -2   1   4
TEMP 20.000
ACTA
L.S. 50
FMAP 2
PLAN -3 0 0.00
BOND $H
EQIV $1 -x, y-1/2, -z+3/2
HTAB C5 O3_$1
EQIV $2 -x, y+1/2, -z+3/2
HTAB C11 O6_$2

WGHT    0.071900    1.102400
FVAR       0.27224
O1    3    0.037929    0.639668    0.611672    11.00000    0.12164    0.04653 =
         0.05512    0.01477    0.01194    0.01921
O2    3    0.288505   -0.072035    0.732759    11.00000    0.06549    0.03297 =
         0.08691   -0.00558    0.03356    0.00541
O3    3    0.118375    0.670237    0.773549    11.00000    0.05369    0.03007 =
         0.06096    0.00054    0.01070    0.00430
O4    3    0.354983    0.358830    0.872745    11.00000    0.02876    0.03345 =
         0.04701   -0.00267    0.00892    0.00010
O5    3    0.471160    0.226904    0.885977    11.00000    0.03244    0.04639 =
         0.06790   -0.00764    0.00706    0.00709
O6    3    0.147125    0.083573    0.717334    11.00000    0.04405    0.03485 =
         0.07307   -0.00762    0.01230   -0.00047
C1    1    0.084206    0.607792    0.695473    11.00000    0.05347    0.03480 =
         0.05234    0.00415    0.01119    0.00574
C2    1    0.111353    0.503988    0.718264    11.00000    0.03989    0.03248 =
         0.04079    0.00107    0.01215    0.00285
C3    1    0.048219    0.430791    0.637417    11.00000    0.04979    0.03716 =
         0.03483    0.00117    0.00668    0.00629
AFIX  13
H3    2    0.053175    0.454351    0.574066    11.00000   -1.20000
AFIX   0
C4    1    0.119265    0.335669    0.663050    11.00000    0.04250    0.03538 =
         0.03604   -0.00314    0.01057    0.00392
AFIX  23
H4A   2    0.196997    0.342646    0.651429    11.00000   -1.20000
H4B   2    0.070046    0.286631    0.617103    11.00000   -1.20000
AFIX   0
C5    1    0.149812    0.300372    0.771934    11.00000    0.03003    0.02711 =
         0.03844   -0.00157    0.01024    0.00109
AFIX  13
H5    2    0.074479    0.278419    0.782642    11.00000   -1.20000
AFIX   0
C6    1    0.248647    0.223052    0.798483    11.00000    0.03330    0.03126 =
         0.03957    0.00187    0.01238    0.00288
C7    1    0.244017    0.123874    0.769086    11.00000    0.03965    0.03189 =
         0.04025    0.00252    0.01470    0.00174
C8    1    0.370211    0.076938    0.807429    11.00000    0.04575    0.03766 =
         0.04841    0.00332    0.01796    0.00984
C9    1    0.390641   -0.021186    0.789364    11.00000    0.05710    0.03908 =
         0.06668    0.00205    0.02517    0.01107
C10   1    0.303510   -0.169334    0.708628    11.00000    0.08746    0.03403 =
         0.14170   -0.00933    0.04605    0.00542
AFIX 137
H10A  2    0.332293   -0.207020    0.769364    11.00000   -1.50000
H10B  2    0.363652   -0.172652    0.676338    11.00000   -1.50000
H10C  2    0.224730   -0.194106    0.663870    11.00000   -1.50000
AFIX   0
C11   1    0.151358    0.631591    0.874479    11.00000    0.04757    0.03675 =
         0.05108   -0.00991    0.00927    0.00266
AFIX  23
H11A  2    0.076713    0.607207    0.883099    11.00000   -1.20000
H11B  2    0.185506    0.682624    0.923370    11.00000   -1.20000
AFIX   0
C12   1    0.246573    0.551205    0.893910    11.00000    0.03633    0.03195 =
         0.04496   -0.00523    0.00686   -0.00157
C13   1    0.373007    0.590845    0.897973    11.00000    0.03975    0.04421 =
         0.07058   -0.00191    0.00891   -0.00762
AFIX 137
H13A  2    0.361397    0.627113    0.837788    11.00000   -1.50000
H13B  2    0.429316    0.538347    0.902836    11.00000   -1.50000
H13C  2    0.407448    0.631887    0.955840    11.00000   -1.50000
AFIX   0
C14   1    0.258229    0.490008    0.987457    11.00000    0.04867    0.04503 =
         0.03891   -0.00855    0.00918   -0.00084
AFIX  23
H14A  2    0.214467    0.521036    1.026040    11.00000   -1.20000
H14B  2    0.345526    0.483047    1.030494    11.00000   -1.20000
AFIX   0
C15   1    0.199579    0.389183    0.949998    11.00000    0.04494    0.03803 =
         0.03670   -0.00054    0.01643    0.00143
C16   1    0.264853    0.310092    1.025252    11.00000    0.07655    0.05244 =
         0.04182    0.01080    0.02543    0.00821
AFIX 137
H16A  2    0.227225    0.249054    0.999889    11.00000   -1.50000
H16B  2    0.256463    0.323044    1.088750    11.00000   -1.50000
H16C  2    0.351931    0.308425    1.034456    11.00000   -1.50000
AFIX   0
C17   1    0.217963    0.379993    0.847631    11.00000    0.02730    0.03086 =
         0.03557    0.00031    0.00932    0.00119
C18   1    0.357576    0.265945    0.851197    11.00000    0.03209    0.03601 =
         0.04267    0.00144    0.01125    0.00533
C19   1    0.476573    0.129592    0.863476    11.00000    0.04400    0.04560 =
         0.06441   -0.00414    0.01282    0.01275
C20   1   -0.089703    0.419889    0.621623    11.00000    0.04171    0.05333 =
         0.06544   -0.01205   -0.00247    0.00850
AFIX 137
H20A  2   -0.130561    0.481194    0.604132    11.00000   -1.50000
H20B  2   -0.097365    0.396803    0.682697    11.00000   -1.50000
H20C  2   -0.128092    0.374800    0.568088    11.00000   -1.50000
AFIX   0
C21   1    0.192759    0.480392    0.808620    11.00000    0.02943    0.03010 =
         0.04040   -0.00071    0.01418   -0.00047
AFIX  13
H21   2    0.265276    0.482936    0.787908    11.00000   -1.20000
AFIX   0
C22   1    0.510485   -0.059521    0.828777    11.00000    0.07312    0.05260 =
         0.11374   -0.00783    0.02259    0.03055
AFIX  43
H22   2    0.523112   -0.123883    0.817136    11.00000   -1.20000
AFIX   0
C23   1    0.610664   -0.003823    0.884697    11.00000    0.05866    0.08363 =
         0.13911   -0.02432    0.00152    0.03875
AFIX  43
H23   2    0.689904   -0.031317    0.910927    11.00000   -1.20000
AFIX   0
C24   1    0.595895    0.091944    0.902613    11.00000    0.04616    0.07429 =
         0.11156   -0.02049    0.00190    0.02372
AFIX  43
H24   2    0.663865    0.129891    0.939745    11.00000   -1.20000
AFIX   0
C25   1    0.059338    0.390033    0.932883    11.00000    0.05066    0.05172 =
         0.05495   -0.00764    0.02949   -0.00349
AFIX 137
H25A  2    0.048633    0.406906    0.994658    11.00000   -1.50000
H25B  2    0.024596    0.327305    0.911581    11.00000   -1.50000
H25C  2    0.017251    0.436419    0.881728    11.00000   -1.50000
AFIX   0
HKLF 4 1 1 0 0 0 1 0 0 0 1

REM  _qiaochuang20150108
REM R1 =  0.0556 for    3531 Fo > 4sig(Fo)  and  0.0588 for all    3866 data
REM    285 parameters refined using      0 restraints

END

WGHT      0.0718      1.1008

REM Highest difference peak  0.242,  deepest hole -0.670,  1-sigma level  0.055
Q1    1   0.1180  0.4847  0.7870  11.00000  0.05    0.24
Q2    1   0.2195  0.4968  1.0616  11.00000  0.05    0.19
Q3    1   0.0054  0.2751  0.1563  11.00000  0.05    0.19
;
_shelx_res_checksum    5062

_shelx_hkl_file
;
   0   0   2  542.17   38.33
   0   0   2  638.27   45.24
   0   0  -2  566.79   41.09
   0   0   3    3.63    0.22
   0   0   3    3.51    0.10
   0   0  -3    2.99    0.19
   0   0  -3    3.70    0.22
   0   0   4  365.43   22.47
   0   0   4  362.18   21.33
   0   0  -4  365.06   23.07
   0   0  -4  365.45   22.51
   0   0   5    2.60    0.23
   0   0   5    3.24    0.11
   0   0  -5    3.64    0.27
   0   0  -5    1.93    0.28
   0   0   6   24.52    1.05
   0   0  -6   24.25    1.04
   0   0  -6   24.89    1.27
   0   0   7    0.31    0.19
   0   0  -7    1.31    0.19
   0   0  -7    0.38    0.13
   0   0  -7    0.28    0.09
   0   0  -7    0.47    0.13
   0   0   8  148.37    7.20
   0   0   8  124.83    5.66
   0   0  -8  129.89    6.50
   0   0  -8  137.58    6.13
   0   0  -8  136.29    6.22
   0   0  -8  120.84    5.61
   0   0   9    0.14    0.19
   0   0  -9    0.11    0.19
   0   0  -9    0.25    0.12
   0   0  -9    0.14    0.12
   0   0  10   28.59    1.11
   0   0  10   25.82    1.49
   0   0 -10   25.64    1.60
   0   0 -10   26.71    1.22
   0   0  11    0.28    0.16
   0   0  11    0.57    0.21
   0   0 -11    0.37    0.23
   0   0 -11    0.22    0.16
   0   0  12   69.53    3.26
   0   0  12   61.08    3.58
   0   0 -12   67.54    3.15
   0   0 -12   59.35    2.74
   0   0  13    0.23    0.16
   0   0 -13    0.09    0.12
   0   0 -13    0.15    0.21
   0   0  14    4.84    0.40
   0   0 -14    3.31    0.29
   0   0 -14    3.97    0.42
   0   0  15    0.05    0.08
   0   0 -15   -0.05    0.12
   0   0  16    0.17    0.09
   0  -1   2  341.85   20.19
   0  -1   2  362.51   21.20
   0  -1  -2  357.34   20.85
   0  -1  -2  317.22   18.85
   0  -1  -2  458.45   27.01
   0   1  -2  353.49   21.03
   0  -1   3  451.42   27.85
   0  -1   3  374.64   23.78
   0   1   3  357.92   22.61
   0  -1  -3  366.31   23.17
   0   1  -3  458.22   28.87
   0  -1  -3  472.36   29.81
   0  -1   4   46.79    1.46
   0  -1   4   47.94    1.66
   0   1   4   45.90    1.28
   0   1   4   50.39    1.79
   0   1  -4   48.45    1.77
   0  -1  -4   47.86    1.67
   0  -1  -4   48.32    1.93
   0  -1   5   16.85    0.60
   0   1   5   15.91    0.35
   0   1   5   15.95    0.57
   0  -1   5   16.57    0.48
   0   1  -5   16.07    0.68
   0  -1  -5   16.86    0.74
   0   1  -5   17.06    0.81
   0  -1  -5   16.40    0.66
   0  -1   6    2.43    0.25
   0  -1   6    2.11    0.12
   0   1   6    3.04    0.23
   0   1  -6    2.20    0.29
   0   1  -6    2.31    0.35
   0  -1  -6    2.36    0.27
   0  -1  -6    2.40    0.39
   0   1   7    5.16    0.41
   0  -1   7    4.59    0.40
   0   1  -7    3.08    0.25
   0  -1  -7    4.61    0.27
   0   1  -7    5.66    0.40
   0  -1  -7    3.70    0.22
   0  -1  -7    4.12    0.24
   0  -1  -7    3.71    0.39
   0   1  -7    3.97    0.23
   0   1   8   20.35    0.95
   0  -1   8   19.34    1.06
   0  -1   8   19.40    0.73
   0  -1  -8   18.18    0.93
   0  -1  -8   19.86    0.82
   0   1  -8   19.61    0.69
   0  -1  -8   18.38    0.77
   0   1  -8   19.88    1.02
   0   1  -8   20.60    0.88
   0  -1  -8   19.28    0.79
   0  -1   9    0.66    0.15
   0  -1   9    0.63    0.16
   0   1   9    0.56    0.27
   0  -1   9    0.63    0.27
   0  -1  -9    1.05    0.31
   0  -1  -9    0.83    0.21
   0  -1  -9    0.97    0.18
   0   1  -9    0.84    0.15
   0   1  -9    0.69    0.24
   0   1  -9    0.68    0.28
   0  -1  -9    0.97    0.20
   0  -1  10    4.86    0.33
   0  -1  10    6.12    0.44
   0   1  10    4.06    0.46
   0  -1  10    3.39    0.31
   0  -1 -10    3.77    0.48
   0   1 -10    4.28    0.60
   0  -1 -10    3.54    0.33
   0   1 -10    4.64    0.50
   0  -1 -10    3.94    0.62
   0   1 -10    3.66    0.25
   0  -1 -10    4.61    0.45
   0   1  11    0.70    0.19
   0  -1  11    0.88    0.26
   0  -1  11    1.09    0.34
   0   1  11    0.62    0.32
   0  -1 -11    0.85    0.24
   0   1 -11    0.48    0.39
   0  -1 -11    0.73    0.22
   0   1 -11    0.79    0.32
   0   1 -11    0.74    0.19
   0   1  12    2.96    0.40
   0  -1  12    3.57    0.41
   0  -1  12    3.10    0.63
   0   1  12    1.91    0.58
   0   1 -12    3.39    0.43
   0  -1 -12    3.23    0.37
   0   1 -12    3.44    0.30
   0  -1 -12    4.35    0.46
   0  -1  13    0.69    0.24
   0   1  13    0.63    0.17
   0  -1 -13    0.80    0.22
   0  -1 -13    0.68    0.20
   0   1 -13    0.83    0.25
   0   1  14    6.56    0.48
   0  -1  14    6.04    0.49
   0   1 -14    5.86    0.61
   0  -1 -14    5.31    0.40
   0  -1 -14    6.35    0.48
   0  -1  15    0.52    0.16
   0   1  15    0.45    0.12
   0   1 -15    0.30    0.22
   0  -1 -15    0.27    0.18
   0   1  16    0.03    0.05
   0  -1  16    0.03    0.07
   0  -2   1   20.09    0.53
   0  -2   1   19.46    0.52
   0  -2  -1   20.47    0.56
   0  -2  -1   20.68    0.55
   0  -2  -1   21.53    0.59
   0  -2  -1   19.52    0.47
   0  -2   2    1.91    0.12
   0  -2   2    1.81    0.14
   0  -2  -2    1.71    0.10
   0  -2  -2    1.56    0.12
   0  -2  -2    2.15    0.14
   0   2  -2    1.84    0.10
   0  -2   3    2.50    0.16
   0  -2   3    2.63    0.16
   0  -2  -3    1.82    0.17
   0  -2  -3    2.45    0.20
   0   2  -3    2.31    0.17
   0  -2  -3    2.59    0.17
   0  -2   4    6.29    0.36
   0   2   4    6.41    0.31
   0  -2   4    6.26    0.26
   0   2  -4    6.03    0.36
   0  -2  -4    6.90    0.34
   0  -2  -4    6.99    0.34
   0  -2   5   57.33    2.30
   0   2   5   59.12    2.18
   0  -2   5   59.67    2.11
   0   2  -5   61.95    2.56
   0  -2  -5   55.58    2.28
   0  -2  -5   67.59    2.77
   0   2   6    4.73    0.30
   0  -2   6    4.57    0.22
   0  -2   6    4.16    0.38
   0   2  -6    4.67    0.39
   0  -2  -6    5.20    0.50
   0  -2  -6    3.99    0.40
   0  -2   7   99.90    4.17
   0   2   7   99.76    4.59
   0  -2   7  105.75    4.74
   0  -2   7  104.62    4.18
   0  -2  -7   92.15    4.44
   0  -2  -7   99.50    4.11
   0   2  -7  100.13    4.28
   0   2  -7  105.45    4.72
   0  -2  -7  101.53    4.20
   0  -2  -7   94.62    3.79
   0  -2   8    8.49    0.44
   0  -2   8    8.69    0.52
   0  -2   8    8.69    0.35
   0   2   8    8.59    0.53
   0  -2  -8    8.10    0.41
   0   2  -8    9.48    0.63
   0  -2  -8    8.12    0.44
   0   2  -8    7.62    0.32
   0  -2  -8    7.02    0.61
   0   2  -8    8.22    0.42
   0  -2  -8    7.77    0.43
   0  -2   9   28.97    1.55
   0   2   9   27.49    1.32
   0  -2   9   29.01    1.15
   0  -2   9   27.09    1.12
   0   2  -9   28.84    1.35
   0   2  -9   30.43    1.54
   0  -2  -9   29.26    1.22
   0   2  -9   27.09    0.98
   0  -2  -9   27.19    1.22
   0  -2  -9   27.21    1.19
   0  -2  -9   29.02    1.64
   0  -2  10   22.68    1.12
   0  -2  10   21.29    0.96
   0  -2  10   21.48    1.36
   0   2  10   21.83    1.17
   0  -2 -10   22.31    0.97
   0   2 -10   21.18    0.80
   0  -2 -10   23.02    1.00
   0  -2 -10   22.31    1.27
   0   2 -10   22.95    1.34
   0   2 -10   23.55    1.25
   0  -2  11   78.01    4.28
   0   2  11   75.88    3.91
   0  -2  11   83.05    3.97
   0  -2  11   72.41    3.28
   0   2 -11   81.71    4.26
   0   2 -11   79.50    4.18
   0  -2 -11   77.30    3.78
   0  -2 -11   78.57    3.76
   0  -2 -11   73.30    3.59
   0   2  12    0.11    0.27
   0  -2  12    0.39    0.20
   0   2  12    0.15    0.17
   0  -2  12    0.23    0.13
   0  -2  12    0.26    0.33
   0   2 -12    0.53    0.25
   0  -2 -12    0.33    0.19
   0  -2 -12    0.43    0.21
   0   2  13    5.94    0.39
   0  -2  13    5.85    0.51
   0  -2 -13    5.24    0.45
   0   2 -13    6.44    0.64
   0  -2 -13    6.27    0.45
   0  -2  14    0.15    0.14
   0   2  14    0.08    0.12
   0  -2 -14    0.03    0.12
   0  -2 -14    0.15    0.15
   0   2 -14    0.09    0.16
   0   2  15    0.44    0.14
   0  -2  15    0.46    0.17
   0  -2 -15    0.26    0.18
   0  -2 -15    0.81    0.14
   0   2 -15    0.43    0.23
   0  -3   0    0.08    0.06
   0  -3   0    0.02    0.07
   0  -3   1   68.70    2.55
   0  -3   1   64.29    2.37
   0  -3  -1   64.31    2.33
   0  -3  -1   72.55    2.56
   0  -3  -1   67.64    2.46
   0  -3   2  123.84    5.26
   0  -3   2  128.20    5.50
   0  -3  -2  114.22    4.88
   0  -3  -2  132.75    5.45
   0  -3  -2  130.67    5.44
   0  -3  -2  126.70    5.33
   0  -3   3   38.03    1.43
   0  -3   3   39.92    1.37
   0  -3  -3   40.83    1.40
   0  -3  -3   42.90    1.44
   0  -3  -3   40.65    1.32
   0  -3   4   50.24    1.79
   0  -3   4   49.91    1.86
   0  -3  -4   54.18    2.04
   0  -3  -4   48.97    1.82
   0  -3  -4   51.68    1.98
   0  -3   5    8.93    0.54
   0   3   5    8.44    0.47
   0  -3   5    9.16    0.41
   0  -3  -5    8.67    0.48
   0  -3  -5    9.37    0.58
   0  -3   6  128.71    5.66
   0  -3   6  131.07    6.38
   0   3   6  119.58    5.75
   0  -3   6  127.58    5.45
   0  -3   6  135.29    6.07
   0  -3  -6  128.16    5.61
   0  -3  -6  124.99    5.26
   0   3  -6  125.37    5.53
   0  -3  -6  125.88    6.06
   0  -3   7   39.08    1.46
   0  -3   7   37.21    1.31
   0  -3   7   37.48    1.29
   0  -3   7   38.62    1.74
   0   3   7   37.69    1.62
   0  -3  -7   37.14    1.26
   0   3  -7   36.68    1.66
   0  -3  -7   35.18    1.16
   0   3  -7   38.12    1.47
   0  -3  -7   34.85    1.66
   0  -3  -7   37.12    1.38
   0  -3   8    9.29    0.59
   0  -3   8    9.89    0.51
   0   3   8    8.95    0.58
   0  -3   8    9.90    0.39
   0   3  -8   10.15    0.58
   0  -3  -8    8.47    0.41
   0  -3  -8    8.94    0.73
   0   3  -8    9.06    0.55
   0  -3  -8    8.43    0.42
   0  -3  -8    9.55    0.43
   0  -3   9    2.76    0.47
   0  -3   9    3.22    0.30
   0   3   9    3.09    0.36
   0  -3   9    3.41    0.33
   0  -3  -9    2.68    0.32
   0   3  -9    4.15    0.39
   0   3  -9    3.12    0.39
   0  -3  -9    3.52    0.29
   0  -3  -9    3.10    0.35
   0   3  10   11.66    0.92
   0  -3  10   11.73    0.70
   0  -3  10   13.18    0.83
   0  -3  10   12.40    0.72
   0   3 -10   13.00    1.00
   0  -3 -10   12.51    0.66
   0   3 -10   12.05    0.71
   0  -3 -10   11.14    0.76
   0  -3 -10   10.58    0.74
   0  -3  11   59.74    2.63
   0  -3  11   54.28    2.52
   0   3  11   55.78    2.84
   0  -3  11   55.48    2.95
   0   3 -11   56.37    2.75
   0  -3 -11   55.63    2.79
   0  -3 -11   59.97    2.87
   0   3 -11   58.61    3.14
   0  -3 -11   57.78    2.45
   0  -3  12    0.23    0.18
   0  -3  12    0.19    0.12
   0  -3  12    0.28    0.31
   0   3  12    0.11    0.26
   0   3 -12   -0.19    0.35
   0   3 -12    0.21    0.23
   0  -3 -12    0.30    0.18
   0  -3 -12    0.07    0.16
   0   3  13    3.11    0.37
   0  -3  13    3.35    0.43
   0   3 -13    3.69    0.43
   0  -3 -13    4.18    0.38
   0  -3 -13    3.82    0.38
   0  -3  14    0.05    0.12
   0   3  14   -0.00    0.10
   0   3 -14   -0.04    0.17
   0  -3 -14    0.33    0.12
   0  -3 -14   -0.05    0.09
   0  -3  15    0.07    0.11
   0   3  15    0.07    0.09
   0  -3 -15    0.20    0.10
   0   3 -15    0.01    0.15
   0  -4   0  532.08   36.65
   0  -4   0  461.01   31.95
   0  -4   1    6.93    0.35
   0  -4   1    6.58    0.40
   0  -4  -1    7.09    0.34
   0  -4  -1    6.72    0.37
   0  -4  -1    7.54    0.32
   0  -4   2    6.98    0.39
   0  -4   2    7.60    0.40
   0  -4  -2    9.08    0.35
   0  -4  -2    7.05    0.35
   0  -4  -2    6.32    0.33
   0  -4   3   28.70    1.11
   0  -4   3   25.80    1.13
   0  -4  -3   27.65    0.87
   0  -4  -3   29.05    1.05
   0  -4  -3   29.68    1.05
   0  -4   4  220.16   12.37
   0  -4   4  235.86   12.77
   0  -4  -4  218.30   11.67
   0  -4  -4  245.96   13.14
   0  -4   5   20.05    0.86
   0  -4   5   18.24    0.84
   0  -4  -5   19.20    0.83
   0  -4   6   27.37    1.19
   0  -4   6   26.94    1.05
   0  -4   6   28.16    0.88
   0  -4   6   27.76    1.11
   0   4   6   29.32    1.28
   0   4  -6   27.28    0.98
   0  -4  -6   28.33    1.21
   0  -4  -6   27.84    0.93
   0  -4  -6   27.54    0.86
   0  -4   7    0.77    0.14
   0  -4   7    0.93    0.15
   0  -4   7    0.87    0.26
   0  -4   7    0.62    0.17
   0   4   7    1.15    0.18
   0  -4  -7    0.59    0.11
   0  -4  -7    0.32    0.20
   0   4  -7    0.60    0.17
   0  -4  -7    0.80    0.17
   0  -4  -7    0.81    0.09
   0  -4   8    7.82    0.44
   0   4   8    8.16    0.47
   0  -4   8    7.57    0.59
   0  -4   8    8.73    0.39
   0  -4  -8    8.16    0.38
   0  -4  -8    8.83    0.49
   0   4  -8    8.37    0.63
   0   4  -8    7.90    0.44
   0  -4  -8    9.17    0.46
   0  -4   9   27.33    1.18
   0  -4   9   26.93    1.29
   0  -4   9   25.87    1.53
   0   4   9   26.14    1.25
   0  -4  -9   26.02    1.26
   0   4  -9   25.23    1.13
   0  -4  -9   25.97    1.01
   0   4  -9   28.24    1.52
   0  -4  -9   26.86    1.09
   0  -4  10   30.61    1.48
   0   4  10   30.25    1.69
   0  -4  10   32.41    1.51
   0  -4  10   31.63    1.97
   0   4 -10   31.85    1.92
   0  -4 -10   30.63    1.53
   0  -4 -10   32.23    1.29
   0   4 -10   32.13    1.72
   0  -4 -10   31.63    1.55
   0  -4  11    0.75    0.24
   0  -4  11    0.21    0.38
   0   4  11    0.42    0.30
   0  -4  11    0.98    0.25
   0  -4 -11    0.61    0.30
   0   4 -11    0.79    0.33
   0   4 -11    0.32    0.38
   0  -4 -11    0.76    0.22
   0  -4 -11    0.74    0.19
   0  -4  12    2.05    0.33
   0  -4  12    1.76    0.20
   0  -4 -12    1.31    0.26
   0  -4 -12    2.00    0.30
   0  -4 -12    1.73    0.34
   0   4 -12    1.57    0.39
   0  -4  13    1.86    0.30
   0   4  13    1.64    0.23
   0  -4  13    1.39    0.20
   0   4 -13    1.54    0.28
   0  -4 -13    1.62    0.30
   0   4  14    0.45    0.12
   0  -4  14    0.46    0.19
   0  -4 -14    0.52    0.18
   0   4 -14    0.77    0.23
   0   4  15   -0.02    0.07
   0  -4  15   -0.12    0.09
   0   4 -15    0.26    0.12
   0  -4 -15   -0.07    0.07
   0  -5   0    0.07    0.09
   0  -5   0    0.06    0.12
   0  -5   1    0.61    0.17
   0  -5   1    0.67    0.16
   0  -5  -1    0.38    0.15
   0  -5  -1    0.48    0.16
   0  -5   2  160.28    7.77
   0  -5   2  167.26    8.38
   0  -5  -2  166.76    8.08
   0  -5  -2  157.49    7.67
   0  -5  -2  170.25    8.14
   0  -5   3    5.57    0.47
   0  -5   3    6.15    0.46
   0  -5  -3    6.18    0.35
   0  -5  -3    5.96    0.36
   0  -5  -3    6.37    0.38
   0  -5   4   45.53    1.93
   0  -5   4   41.04    1.72
   0  -5  -4   46.63    1.76
   0  -5  -4   45.12    1.81
   0  -5   5   85.82    3.39
   0  -5   5   88.58    3.93
   0  -5   5   83.00    3.84
   0  -5   5   94.53    3.81
   0  -5  -5   82.37    3.68
   0  -5  -5   97.23    3.82
   0  -5  -5   90.05    3.85
   0  -5  -5   87.62    3.27
   0  -5   6   96.77    3.98
   0   5   6   93.41    4.10
   0  -5   6   93.25    3.88
   0  -5   6   91.58    4.53
   0  -5   6   89.92    4.03
   0  -5  -6   96.44    4.29
   0  -5  -6   92.21    3.88
   0  -5  -6   91.59    3.50
   0   5  -6   92.53    3.83
   0   5   7   15.31    0.70
   0  -5   7   15.31    0.77
   0  -5   7   15.26    0.64
   0  -5   7   14.96    0.64
   0  -5   7   14.22    0.93
   0  -5  -7   15.29    0.50
   0  -5  -7   15.74    0.70
   0   5  -7   13.81    0.64
   0  -5   8    3.49    0.32
   0  -5   8    3.72    0.37
   0  -5   8    2.47    0.52
   0   5   8    2.92    0.41
   0  -5  -8    3.33    0.36
   0  -5  -8    3.19    0.28
   0   5  -8    3.55    0.34
   0   5  -8    3.03    0.45
   0   5   9    1.07    0.28
   0  -5   9    0.78    0.32
   0  -5   9    1.22    0.20
   0  -5   9    1.09    0.23
   0   5  -9    1.12    0.35
   0  -5  -9    1.39    0.29
   0   5  -9    1.21    0.28
   0  -5  -9    0.92    0.22
   0  -5  10    7.96    0.66
   0   5  10    7.40    0.70
   0  -5  10    8.58    0.59
   0  -5  10    8.23    0.91
   0  -5 -10    8.74    0.65
   0   5 -10    7.00    0.67
   0  -5 -10    7.21    0.59
   0   5 -10    7.65    0.85
   0  -5  11    3.77    0.78
   0  -5  11    4.52    0.39
   0  -5  11    5.06    0.45
   0   5  11    3.19    0.57
   0   5 -11    3.85    0.74
   0  -5 -11    4.88    0.49
   0  -5 -11    4.60    0.56
   0   5 -11    4.45    0.45
   0  -5  12    0.28    0.18
   0  -5  12    0.17    0.15
   0   5 -12    0.19    0.16
   0  -5 -12    0.31    0.20
   0  -5 -12    0.22    0.16
   0  -5  13    0.15    0.11
   0  -5  13    0.02    0.09
   0   5  13   -0.08    0.07
   0   5 -13   -0.07    0.14
   0  -5 -13   -0.03    0.09
   0  -5  14    1.31    0.25
   0  -5  14    1.63    0.17
   0   5  14    1.54    0.17
   0   5 -14    1.80    0.32
   0  -5 -14    1.89    0.21
   0   5  15    0.01    0.06
   0  -5  15    0.09    0.07
   0   5 -15    0.33    0.10
   0  -5 -15    0.03    0.10
   0  -6   0   21.98    1.09
   0  -6   0   20.88    0.83
   0  -6   1  178.64    9.56
   0  -6   1  177.87    9.28
   0  -6  -1  212.65   10.88
   0  -6  -1  174.65    9.00
   0  -6   2    1.26    0.29
   0  -6   2    1.60    0.30
   0  -6  -2    1.64    0.27
   0  -6  -2    1.70    0.25
   0  -6   3  122.38    6.00
   0  -6   3  122.89    5.94
   0  -6  -3  128.49    5.87
   0  -6  -3  124.55    5.79
   0  -6  -3  127.89    5.92
   0  -6   4   72.63    2.76
   0  -6   4   71.77    2.58
   0  -6   4   68.32    3.23
   0  -6   4   72.27    2.67
   0  -6   4   66.51    2.51
   0  -6   4   70.21    3.16
   0  -6  -4   72.64    3.01
   0  -6  -4   69.63    2.37
   0  -6  -4   72.82    2.97
   0  -6   5    3.99    0.45
   0  -6   5    3.77    0.28
   0  -6   5    3.50    0.24
   0  -6   5    4.91    0.39
   0  -6   5    3.74    0.21
   0   6  -5    3.70    0.20
   0  -6  -5    3.68    0.17
   0  -6  -5    3.69    0.24
   0  -6  -5    4.71    0.30
   0  -6  -5    3.69    0.33
   0  -6   6   10.57    0.55
   0  -6   6    9.65    0.77
   0   6   6   10.40    0.62
   0  -6   6   11.94    0.69
   0  -6   6   11.23    0.39
   0  -6   6   10.76    0.49
   0  -6  -6   11.21    0.35
   0   6  -6   10.58    0.46
   0  -6  -6   11.56    0.51
   0   6   7   17.13    0.91
   0  -6   7   17.41    0.89
   0  -6   7   17.61    0.95
   0  -6   7   16.53    0.95
   0  -6   7   17.47    0.68
   0  -6  -7   18.21    0.73
   0   6  -7   16.62    0.73
   0  -6  -7   17.73    0.59
   0  -6   8    1.64    0.44
   0   6   8    2.11    0.32
   0  -6   8    1.94    0.33
   0  -6   8    1.31    0.28
   0   6  -8    1.84    0.39
   0  -6  -8    1.90    0.30
   0  -6  -8    2.23    0.25
   0   6  -8    1.62    0.28
   0  -6   9    0.03    0.15
   0  -6   9    0.22    0.26
   0  -6   9    0.20    0.19
   0   6   9    0.15    0.17
   0  -6  -9    0.19    0.14
   0  -6  -9    0.27    0.14
   0   6  -9   -0.01    0.20
   0   6  -9    0.28    0.18
   0  -6  10    0.16    0.11
   0  -6  10   -0.22    0.13
   0  -6  10    0.08    0.18
   0   6  10    0.03    0.16
   0  -6 -10    0.08    0.11
   0   6 -10    0.08    0.15
   0   6 -10    0.07    0.17
   0  -6 -10   -0.03    0.15
   0  -6  11    0.96    0.21
   0  -6  11    0.98    0.26
   0  -6 -11    1.19    0.26
   0   6 -11    1.33    0.27
   0  -6 -11    0.86    0.26
   0   6 -11    0.31    0.37
   0  -6  12    0.49    0.15
   0  -6  12    0.33    0.21
   0  -6 -12    0.51    0.24
   0  -6 -12    0.53    0.24
   0   6 -12    0.42    0.23
   0  -6  13   -0.02    0.08
   0   6  13    0.06    0.09
   0  -6  13    0.11    0.12
   0  -6 -13    0.07    0.14
   0   6 -13    0.18    0.15
   0  -6  14    0.05    0.09
   0   6  14    0.10    0.08
   0  -6  14    0.16    0.08
   0   6 -14    0.06    0.11
   0  -6 -14    0.13    0.13
   0  -7   0    0.25    0.17
   0  -7   0    0.22    0.08
   0  -7   0    0.27    0.16
   0  -7   1   25.76    1.25
   0  -7   1   29.29    1.47
   0  -7   1   24.98    0.90
   0  -7  -1   25.72    0.80
   0  -7  -1   26.11    1.20
   0  -7  -1   27.91    1.17
   0  -7   2  266.32   14.95
   0  -7   2  284.22   15.89
   0  -7   2  272.46   16.55
   0  -7   2  276.13   15.67
   0  -7   2  290.41   17.85
   0  -7  -2  307.57   18.00
   0  -7  -2  274.73   15.30
   0  -7  -2  287.82   17.28
   0  -7  -2  268.73   14.86
   0  -7   3    5.42    0.28
   0  -7   3    5.06    0.23
   0  -7   3    5.39    0.42
   0  -7   3    6.10    0.23
   0  -7   3    5.51    0.46
   0  -7   3    4.77    0.21
   0  -7  -3    4.84    0.20
   0  -7  -3    5.03    0.21
   0  -7  -3    5.74    0.39
   0  -7  -3    5.00    0.38
   0  -7   4    2.33    0.18
   0  -7   4    2.37    0.21
   0  -7   4    2.09    0.37
   0  -7   4    2.46    0.35
   0  -7   4    2.00    0.18
   0  -7   4    2.32    0.19
   0  -7  -4    1.73    0.13
   0  -7  -4    2.30    0.21
   0  -7  -4    1.78    0.12
   0  -7  -4    2.03    0.15
   0  -7  -4    2.01    0.26
   0  -7   5    3.80    0.24
   0  -7   5    5.10    0.49
   0  -7   5    4.79    0.42
   0  -7   5    4.21    0.27
   0  -7   5    4.46    0.34
   0  -7  -5    4.24    0.26
   0  -7  -5    4.24    0.20
   0  -7  -5    4.04    0.37
   0  -7   6    3.14    0.44
   0  -7   6    3.39    0.54
   0  -7   6    3.06    0.25
   0  -7   6    3.75    0.24
   0  -7   6    4.39    0.35
   0   7  -6    3.21    0.25
   0  -7  -6    3.48    0.20
   0  -7  -6    3.93    0.29
   0  -7   7   46.22    2.69
   0  -7   7   52.85    1.92
   0   7   7   48.66    2.30
   0  -7   7   49.61    2.38
   0  -7   7   51.61    2.14
   0  -7   7   48.37    2.09
   0  -7  -7   51.84    2.05
   0  -7  -7   50.32    1.90
   0   7  -7   48.96    2.04
   0  -7   8    3.35    0.64
   0  -7   8    3.69    0.38
   0  -7   8    4.12    0.39
   0   7   8    2.98    0.41
   0   7  -8    3.28    0.51
   0   7  -8    3.20    0.36
   0  -7  -8    3.84    0.34
   0  -7  -8    3.48    0.31
   0  -7   9   14.57    0.83
   0  -7   9   15.16    0.99
   0  -7   9   14.32    1.28
   0   7   9   13.16    0.87
   0   7  -9   13.30    1.16
   0   7  -9   13.73    0.82
   0  -7  -9   15.11    0.90
   0  -7  -9   13.57    0.75
   0   7  10    0.01    0.13
   0  -7  10    0.00    0.14
   0  -7  10    0.13    0.13
   0  -7  10    0.11    0.26
   0   7 -10    0.21    0.24
   0   7 -10    0.01    0.12
   0  -7 -10    0.16    0.14
   0  -7 -10   -0.10    0.17
   0  -7  11    6.13    0.52
   0  -7  11    5.51    0.53
   0  -7 -11    5.08    0.50
   0  -7 -11    5.11    0.48
   0   7 -11    5.58    0.53
   0  -7  12    3.11    0.40
   0  -7  12    4.24    0.33
   0  -7 -12    3.67    0.46
   0  -7 -12    3.57    0.44
   0   7 -12    3.42    0.45
   0  -7  13   14.16    0.69
   0  -7  13   14.00    0.75
   0   7  13   13.68    0.61
   0  -7 -13   14.23    0.86
   0   7 -13   14.04    0.70
   0   7  14    0.63    0.12
   0  -7  14    0.55    0.14
   0  -7  14    0.80    0.13
   0  -7 -14    0.83    0.20
   0   7 -14    0.52    0.19
   0  -8   0   48.56    2.00
   0  -8   0   47.75    1.77
   0  -8   0   46.76    1.54
   0  -8   0   45.98    2.21
   0  -8   0   46.78    1.59
   0  -8   1   58.52    2.79
   0  -8   1   68.78    2.55
   0  -8   1   68.42    3.08
   0  -8   1   68.26    2.47
   0  -8   1   66.51    2.42
   0  -8   1   64.72    2.33
   0  -8  -1   69.01    3.18
   0  -8  -1   67.04    2.91
   0  -8  -1   69.31    2.63
   0  -8  -1   64.41    2.32
   0  -8  -1   67.39    2.44
   0  -8   2   38.23    1.97
   0  -8   2   38.52    1.84
   0  -8   2   37.71    1.31
   0  -8   2   40.29    1.40
   0  -8   2   37.28    1.29
   0  -8   2   37.43    1.46
   0  -8  -2   36.40    1.59
   0  -8  -2   42.49    1.74
   0  -8  -2   39.37    1.37
   0  -8  -2   37.86    1.25
   0  -8   3    4.10    0.26
   0  -8   3    4.63    0.28
   0  -8   3    4.65    0.42
   0  -8   3    4.80    0.29
   0  -8   3    4.84    0.46
   0  -8   3    4.05    0.27
   0  -8  -3    4.25    0.24
   0  -8  -3    4.52    0.41
   0  -8  -3    4.67    0.22
   0  -8  -3    4.09    0.18
   0  -8   4   81.63    3.41
   0  -8   4   76.74    3.18
   0  -8   4   77.95    3.97
   0  -8   4   79.19    3.28
   0  -8   4   82.24    3.24
   0  -8   4   77.64    3.99
   0  -8  -4   78.85    2.99
   0  -8  -4   83.64    3.27
   0  -8  -4   75.43    2.88
   0  -8  -4   78.61    3.50
   0  -8   5   14.98    1.12
   0  -8   5   16.45    1.02
   0  -8   5   15.49    0.69
   0  -8   5   15.98    0.69
   0  -8   5   16.18    0.70
   0  -8  -5   15.78    0.49
   0  -8  -5   15.65    0.72
   0  -8  -5   15.31    0.55
   0  -8  -5   16.06    0.64
   0  -8   6    8.73    0.75
   0  -8   6    8.84    0.52
   0  -8   6    8.58    0.85
   0  -8   6    7.75    0.52
   0  -8   6    9.64    0.46
   0  -8  -6    9.43    0.50
   0  -8  -6    8.81    0.40
   0   8   7   15.49    0.93
   0  -8   7   16.82    0.65
   0  -8   7   14.61    1.24
   0  -8   7   15.60    0.84
   0  -8   7   17.78    1.12
   0  -8   7   16.80    0.99
   0   8  -7   14.57    0.70
   0  -8  -7   16.90    0.87
   0  -8  -7   17.19    0.71
   0   8   8    2.02    0.29
   0  -8   8    1.49    0.57
   0  -8   8    2.21    0.33
   0  -8   8    2.63    0.34
   0  -8  -8    2.10    0.21
   0   8  -8    1.61    0.41
   0  -8  -8    1.73    0.37
   0   8  -8    1.84    0.26
   0  -8   9   41.18    2.24
   0   8   9   36.63    1.92
   0  -8   9   39.60    1.92
   0  -8   9   37.62    2.55
   0   8  -9   39.11    2.48
   0  -8  -9   43.57    1.93
   0  -8  -9   45.13    2.19
   0   8  -9   39.31    1.85
   0  -8  10    0.54    0.22
   0  -8  10    0.48    0.26
   0  -8 -10    0.33    0.26
   0   8 -10    0.39    0.20
   0  -8 -10    0.52    0.17
   0  -8  11   19.39    1.01
   0  -8  11   19.87    0.95
   0   8 -11   18.39    0.87
   0  -8 -11   18.27    1.01
   0  -8 -11   19.07    1.11
   0  -8  12    3.79    0.34
   0  -8  12    3.82    0.38
   0  -8 -12    2.75    0.40
   0  -8 -12    3.72    0.37
   0   8  13    1.24    0.16
   0  -8  13    1.87    0.21
   0  -8  13    1.56    0.21
   0   8 -13    1.49    0.26
   0  -8 -13    1.82    0.23
   0  -8 -14    2.04    0.25
   0  -9   0    0.19    0.17
   0  -9   0    0.01    0.06
   0  -9   0    0.07    0.06
   0  -9   0    0.12    0.15
   0  -9   0    0.07    0.10
   0  -9   1    3.22    0.34
   0  -9   1    2.63    0.19
   0  -9   1    2.51    0.16
   0  -9   1    2.93    0.23
   0  -9   1    2.33    0.38
   0  -9  -1    2.56    0.42
   0  -9  -1    3.57    0.38
   0  -9  -1    2.72    0.26
   0  -9  -1    2.45    0.16
   0  -9  -1    2.67    0.16
   0  -9   2  107.99    4.56
   0  -9   2  103.89    5.27
   0  -9   2  101.82    4.60
   0  -9   2  100.81    5.31
   0  -9   2  102.70    4.33
   0  -9   2  101.82    4.32
   0  -9  -2  103.16    4.40
   0  -9  -2  102.71    4.87
   0  -9  -2  104.06    4.18
   0  -9  -2  101.01    4.99
   0  -9  -2   98.90    4.07
   0  -9   3   21.93    0.84
   0  -9   3   22.47    0.79
   0  -9   3   24.06    0.93
   0  -9   3   22.75    0.89
   0  -9   3   23.39    1.36
   0  -9   3   21.58    1.23
   0  -9  -3   21.57    1.08
   0  -9  -3   22.95    0.78
   0  -9  -3   21.34    0.68
   0  -9  -3   21.98    0.73
   0  -9   4    0.25    0.25
   0  -9   4    0.22    0.15
   0  -9   4    0.05    0.13
   0  -9   4    0.81    0.14
   0  -9   4    0.17    0.24
   0  -9  -4    0.15    0.09
   0  -9  -4    0.18    0.09
   0  -9  -4    0.03    0.16
   0  -9   5    3.23    0.31
   0  -9   5    3.27    0.61
   0  -9   5    3.20    0.32
   0  -9   5    3.23    0.54
   0  -9   5    4.55    0.37
   0  -9  -5    4.55    0.38
   0  -9  -5    3.23    0.22
   0  -9  -5    2.96    0.17
   0  -9  -5    3.47    0.25
   0  -9   6   30.06    1.32
   0  -9   6   30.26    1.95
   0  -9   6   30.59    1.62
   0   9   6   28.67    1.32
   0  -9   6   32.53    1.22
   0  -9   6   33.39    1.56
   0  -9  -6   31.45    1.08
   0  -9  -6   32.00    1.31
   0  -9   7   63.16    2.95
   0   9   7   63.32    3.18
   0  -9   7   78.43    3.72
   0  -9   7   68.23    2.85
   0  -9   7   62.67    3.56
   0  -9   7   69.89    3.73
   0  -9  -7   68.79    2.87
   0  -9  -7   71.02    3.18
   0   9   8    4.96    0.53
   0  -9   8    4.68    0.39
   0  -9   8    5.57    0.53
   0  -9   8    4.80    0.71
   0  -9  -8    5.72    0.41
   0   9  -8    5.39    0.65
   0  -9  -8    5.53    0.52
   0  -9   9   76.79    3.77
   0  -9   9   87.82    4.57
   0  -9  -9   85.02    3.73
   0  -9  -9   85.12    4.17
   0  -9  10   17.53    0.94
   0  -9  10   16.88    0.93
   0  -9 -10   18.28    0.93
   0  -9 -10   17.80    0.92
   0  -9  11    0.19    0.13
   0  -9  11    0.23    0.15
   0  -9 -11    0.12    0.17
   0  -9 -11    0.06    0.13
   0  -9  12    0.23    0.12
   0  -9  12    0.06    0.11
   0  -9 -12    0.16    0.15
   0  -9 -12    0.05    0.10
   0  -9  13    2.99    0.18
   0  -9  13    2.93    0.25
   0   9  13    3.25    0.18
   0  -9 -13    2.99    0.25
   0 -10   0   16.64    0.69
   0 -10   0   16.61    0.59
   0 -10   0   16.67    0.63
   0 -10   0   16.66    1.01
   0 -10   0   16.39    0.96
   0 -10   1    5.55    0.34
   0 -10   1    5.37    0.53
   0 -10   1    4.16    0.55
   0 -10   1    4.90    0.31
   0 -10   1    5.14    0.29
   0 -10  -1    5.18    0.46
   0 -10  -1    5.16    0.30
   0 -10  -1    4.98    0.31
   0 -10  -1    4.97    0.51
   0 -10  -1    5.18    0.28
   0 -10   2    0.07    0.10
   0 -10   2    0.09    0.14
   0 -10   2    0.07    0.09
   0 -10   2    0.12    0.23
   0 -10   2    0.18    0.20
   0 -10   2    0.31    0.10
   0 -10  -2   -0.01    0.16
   0 -10  -2    0.08    0.09
   0 -10  -2    0.11    0.08
   0 -10  -2    0.09    0.08
   0 -10   3    1.32    0.20
   0 -10   3    1.60    0.16
   0 -10   3    1.41    0.36
   0 -10   3    1.13    0.22
   0 -10   3    1.09    0.43
   0 -10   3    1.37    0.17
   0 -10  -3    1.32    0.14
   0 -10  -3    1.12    0.13
   0 -10  -3    1.13    0.29
   0 -10  -3    1.05    0.19
   0 -10   4   91.96    4.28
   0 -10   4   89.12    4.00
   0 -10   4   87.47    4.77
   0 -10   4   87.44    4.91
   0 -10   4   88.26    3.95
   0 -10  -4   87.79    4.21
   0 -10  -4   89.13    3.64
   0 -10  -4   83.36    3.45
   0 -10   5   14.94    0.84
   0 -10   5   14.57    1.23
   0 -10   5   15.02    1.15
   0 -10   5   15.51    0.81
   0 -10   5   14.65    0.74
   0 -10  -5   14.19    0.50
   0 -10  -5   14.43    0.57
   0 -10  -5   14.06    0.83
   0  10   6    3.17    0.45
   0 -10   6    3.78    0.30
   0 -10   6    3.95    0.69
   0 -10   6    4.07    0.30
   0 -10   6    3.88    0.55
   0 -10   6    6.12    0.46
   0 -10  -6    4.06    0.32
   0 -10  -6    4.38    0.28
   0 -10   7   23.40    1.79
   0 -10   7   23.08    1.12
   0  10   7   23.80    1.18
   0 -10   7   27.16    1.38
   0 -10   7   25.16    1.65
   0 -10   7   26.13    1.04
   0 -10  -7   26.72    1.16
   0 -10  -7   25.20    0.92
   0 -10   8   14.29    0.52
   0 -10   8   11.99    0.72
   0 -10   8   14.72    0.94
   0 -10  -8   14.08    0.75
   0 -10  -8   14.86    0.68
   0 -10   9    2.67    0.31
   0 -10   9    2.68    0.21
   0 -10   9    3.24    0.43
   0 -10  -9    2.59    0.33
   0 -10  -9    2.73    0.29
   0 -10  10    3.02    0.39
   0 -10  10    2.50    0.28
   0 -10 -10    2.85    0.33
   0 -10 -10    2.45    0.27
   0 -10  11    0.77    0.16
   0 -10  11    0.89    0.16
   0 -10 -11    0.53    0.19
   0 -10 -11    0.83    0.20
   0 -10  12    0.05    0.06
   0 -10  12    0.06    0.09
   0 -10 -12    0.08    0.10
   0 -11   0    0.07    0.10
   0 -11   0   -0.04    0.08
   0 -11   0    0.04    0.09
   0 -11   0    0.06    0.15
   0 -11   0    0.08    0.07
   0 -11   0   -0.15    0.14
   0 -11   1    4.21    0.35
   0 -11   1    4.39    0.28
   0 -11   1    4.34    0.54
   0 -11   1    3.32    0.48
   0 -11   1    3.97    0.29
   0 -11  -1    4.29    0.38
   0 -11  -1    4.10    0.31
   0 -11  -1    4.22    0.47
   0 -11  -1    3.87    0.26
   0 -11   2   36.55    2.01
   0 -11   2   38.36    1.51
   0 -11   2   38.13    1.37
   0 -11   2   37.68    1.70
   0 -11   2   38.43    2.13
   0 -11  -2   38.32    1.40
   0 -11  -2   37.91    1.87
   0 -11  -2   36.58    1.39
   0 -11  -2   37.33    1.58
   0 -11   3    5.43    0.33
   0 -11   3    7.29    0.70
   0 -11   3    5.59    0.36
   0 -11   3    5.65    0.80
   0 -11   3    5.84    0.51
   0 -11  -3    5.67    0.25
   0 -11  -3    5.94    0.53
   0 -11  -3    5.85    0.37
   0 -11  -3    5.68    0.26
   0 -11   4    5.99    0.42
   0 -11   4    5.19    0.37
   0 -11   4    6.44    0.51
   0 -11   4    6.75    0.71
   0 -11   4    7.94    0.82
   0 -11  -4    5.80    0.30
   0 -11  -4    6.17    0.53
   0 -11  -4    5.53    0.27
   0 -11   5   14.47    0.61
   0 -11   5   14.59    1.07
   0 -11   5   14.83    1.22
   0 -11   5   15.74    0.70
   0 -11   5   16.58    0.74
   0 -11  -5   16.18    0.60
   0 -11  -5   14.78    0.53
   0 -11  -5   15.94    0.75
   0 -11   6    3.15    0.78
   0 -11   6    4.03    0.35
   0  11   6    3.56    0.50
   0 -11   6    4.88    0.68
   0 -11   6    4.62    0.43
   0 -11   6    4.79    0.36
   0 -11  -6    4.29    0.27
   0 -11   7   22.73    1.15
   0 -11   7   19.96    0.90
   0 -11   7   23.26    0.91
   0 -11  -7   22.77    0.87
   0 -11   8    0.09    0.11
   0 -11   8    0.07    0.10
   0 -11   8    0.07    0.16
   0 -11   8    0.03    0.07
   0 -11  -8    0.09    0.11
   0 -11  -8    0.14    0.09
   0 -11   9    6.99    0.55
   0 -11   9    7.14    0.34
   0 -11   9    6.31    0.41
   0 -11  -9    7.22    0.43
   0 -11  -9    6.71    0.36
   0 -11  10    0.10    0.09
   0 -11  10    0.14    0.15
   0 -11 -10    0.15    0.08
   0 -11 -10    0.08    0.11
   0 -11  11   -0.00    0.08
   0 -11  11    0.03    0.07
   0 -11 -11    0.02    0.07
   0 -11 -11    0.00    0.08
   0 -11  12    4.59    0.31
   0 -12   0   14.52    0.98
   0 -12   0   14.17    0.76
   0 -12   0   13.99    0.61
   0 -12   0   13.91    0.56
   0 -12   1    0.62    0.35
   0 -12   1    0.90    0.16
   0 -12   1    0.94    0.23
   0 -12   1    1.13    0.26
   0 -12  -1    1.13    0.19
   0 -12  -1    0.81    0.32
   0 -12  -1    1.06    0.15
   0 -12  -1    1.36    0.23
   0 -12   2   21.10    1.03
   0 -12   2   20.66    1.08
   0 -12   2   21.01    0.82
   0 -12   2   20.88    1.38
   0 -12   2   19.92    1.29
   0 -12  -2   21.38    0.76
   0 -12  -2   21.57    0.96
   0 -12  -2   22.59    1.24
   0 -12  -2   19.72    0.76
   0 -12   3    1.76    0.40
   0 -12   3    1.98    0.24
   0 -12   3    1.65    0.19
   0 -12  -3    1.26    0.15
   0 -12  -3    1.63    0.17
   0 -12  -3    1.68    0.17
   0 -12  -3    1.34    0.35
   0 -12   4   13.92    0.79
   0 -12   4   12.94    0.60
   0 -12   4   13.31    1.00
   0 -12   4   14.08    0.64
   0 -12  -4   14.43    0.47
   0 -12  -4   12.95    0.56
   0 -12   5    3.48    0.35
   0 -12   5    4.62    0.34
   0 -12   5    3.11    0.28
   0 -12   5    4.31    0.30
   0 -12  -5    3.26    0.22
   0 -12  -5    3.81    0.21
   0 -12   6    0.64    0.20
   0 -12   6    0.70    0.16
   0 -12   6    0.95    0.13
   0 -12   6    0.69    0.22
   0 -12  -6    0.70    0.13
   0 -12   7    0.12    0.09
   0 -12   7    0.06    0.11
   0 -12   7    0.11    0.09
   0 -12   7    0.07    0.14
   0 -12  -7    0.11    0.08
   0 -12   8    0.81    0.24
   0 -12   8    0.85    0.15
   0 -12   8    0.97    0.13
   0 -12  -8    0.83    0.14
   0 -12   9    8.61    0.31
   0 -12   9    7.29    0.37
   0 -12   9    8.49    0.56
   0 -12  -9    7.88    0.35
   0 -12  10    1.22    0.24
   0 -12  11    1.04    0.20
   0 -13   0    0.22    0.08
   0 -13   0    0.06    0.12
   0 -13   0   -0.09    0.15
   0 -13   1   20.55    0.73
   0 -13   1   21.35    1.00
   0 -13   1   21.29    0.95
   0 -13  -1   20.22    0.82
   0 -13  -1   21.48    1.00
   0 -13  -1   20.65    0.63
   0 -13   2    3.82    0.37
   0 -13   2    3.40    0.22
   0 -13   2    4.03    0.36
   0 -13  -2    3.97    0.31
   0 -13  -2    3.17    0.23
   0 -13  -2    3.32    0.20
   0 -13   3    2.76    0.21
   0 -13   3    3.27    0.32
   0 -13   3    3.27    0.33
   0 -13  -3    2.82    0.17
   0 -13  -3    2.38    0.16
   0 -13  -3    2.87    0.25
   0 -13   4    2.41    0.29
   0 -13   4    2.43    0.23
   0 -13   4    2.12    0.16
   0 -13  -4    2.43    0.19
   0 -13  -4    2.24    0.15
   0 -13   5    5.02    0.39
   0 -13   5    4.98    0.28
   0 -13   5    5.30    0.38
   0 -13   5    5.11    0.37
   0 -13  -5    5.88    0.24
   0 -13   6    0.11    0.11
   0 -13   6    0.13    0.08
   0 -13   6    0.13    0.08
   0 -13   6    0.13    0.12
   0 -13  -6    0.03    0.06
   0 -13   7    0.59    0.12
   0 -13   7    0.24    0.08
   0 -13   7    0.77    0.16
   0 -13  -7    0.20    0.07
   0 -13   8    6.22    0.43
   0 -13   8    5.60    0.30
   0 -13   9    0.78    0.08
   0 -13   9    0.93    0.19
   0 -14   0   18.46    0.89
   0 -14   0   17.53    0.67
   0 -14   1    0.11    0.12
   0 -14   1    0.08    0.14
   0 -14  -1    0.16    0.13
   0 -14  -1    0.07    0.09
   0 -14   2    5.13    0.40
   0 -14   2    4.95    0.32
   0 -14  -2    4.55    0.23
   0 -14  -2    5.03    0.35
   0 -14   3    2.64    0.27
   0 -14   3    2.54    0.29
   0 -14  -3    2.18    0.21
   0 -14   4    6.19    0.43
   0 -14   4    6.07    0.40
   0 -14  -4    5.64    0.26
   0 -14   5    4.02    0.29
   0 -14   5    3.57    0.32
   0 -14   6    0.01    0.05
   0 -14   6    0.02    0.07
   0 -14   7    0.52    0.11
   0 -14   7    0.47    0.08
   0 -14   7    0.29    0.13
   0 -14   8   16.04    0.53
   0 -15   0    0.05    0.07
   0 -15   0   -0.02    0.08
   0 -15   1    0.10    0.09
   0 -15   1    0.24    0.12
   0 -15  -1    0.11    0.07
   0 -15  -1    0.00    0.10
   0 -15   2    0.21    0.12
   0 -15   2    0.33    0.13
   0 -15  -2    0.26    0.11
   0 -15   3    0.84    0.15
   0 -15   3    0.86    0.16
   0 -15  -3    0.65    0.09
   0 -15   4    0.04    0.08
   0 -15   4    0.09    0.09
   0 -15   5    0.18    0.09
   0 -15   5    0.18    0.08
   0 -15   6    0.13    0.07
   0 -15   6    0.03    0.04
   0 -16   0    6.39    0.34
   0 -16   1    3.74    0.21
   0 -16   1    3.67    0.21
   0 -16  -1    3.59    0.25
   0 -16   2   -0.01    0.06
   0 -16   2    0.04    0.07
   0 -16  -2   -0.04    0.05
   0 -16   3    4.94    0.27
   0 -16   3    4.57    0.26
   0 -16   4    0.19    0.08
   0 -16   4    0.28    0.09
   1   0 -16    0.70    0.13
  -1   0  16    0.01    0.13
   1   0 -15    0.05    0.12
  -1   0  15    0.08    0.11
   1   0 -14   13.40    0.90
   1   0 -14   11.84    0.61
  -1   0  14   13.13    0.77
   1   0 -13   -0.05    0.11
   1   0 -13   -0.03    0.17
  -1   0  13   -0.07    0.14
   1   0 -12   -0.02    0.12
   1   0 -12    0.06    0.16
  -1   0  12    0.00    0.14
  -1   0  12    0.24    0.19
   1   0 -11    0.04    0.13
   1   0 -11    0.17    0.18
  -1   0  11    0.13    0.19
  -1   0  11    0.05    0.14
   1   0 -10   15.46    0.89
   1   0 -10   18.20    1.06
   1   0 -10   17.46    0.90
   1   0 -10   16.99    0.77
  -1   0  10   15.80    0.65
  -1   0  10   17.40    1.06
   1   0  -9    0.10    0.12
   1   0  -9    0.36    0.13
   1   0  -9    0.09    0.19
   1   0  -9   -0.03    0.08
   1   0  -9    0.06    0.13
  -1   0   9    0.14    0.12
  -1   0   9    0.06    0.08
   1   0  -8    0.47    0.27
   1   0  -8    0.55    0.14
   1   0  -8    0.43    0.11
   1   0  -8    0.38    0.10
   1   0  -8    0.31    0.17
  -1   0   8    0.76    0.19
  -1   0   8    0.34    0.10
   1   0  -7    1.07    0.18
   1   0  -7    1.21    0.10
   1   0  -7    0.75    0.27
   1   0  -7    0.62    0.13
  -1   0   7    1.21    0.22
  -1   0   7    0.45    0.10
   1   0  -6    1.22    0.19
   1   0  -6    1.06    0.27
  -1   0   6    1.22    0.23
  -1   0   6    0.89    0.09
   1   0  -5    2.21    0.19
   1   0  -5    2.49    0.34
  -1   0   5    2.28    0.25
  -1   0   5    2.34    0.13
  -1   0   4  213.57   10.85
  -1   0   4  192.59    9.44
  -1   0   3    6.34    0.30
  -1   0   3    6.60    0.22
   1   0   2  247.54   13.17
  -1   0  -2  294.52   15.78
   1   0   3    0.47    0.10
  -1   0  -3    0.45    0.12
   1   0   4   42.80    1.38
  -1   0  -4   32.73    1.23
   1   0   5    1.04    0.15
  -1   0  -5    0.82    0.21
   1   0   6   78.08    3.30
  -1   0  -6   79.65    3.00
  -1   0  -6   75.65    2.93
  -1   0  -6   79.05    3.54
   1   0   7    0.15    0.17
  -1   0  -7    0.03    0.11
  -1   0  -7    0.44    0.10
  -1   0  -7    0.01    0.16
  -1   0  -7    0.05    0.08
   1   0   8   12.86    0.81
  -1   0  -8   12.81    0.56
  -1   0  -8   11.00    0.82
  -1   0  -8   12.35    0.47
   1   0   9    0.11    0.17
   1   0   9   -0.03    0.10
  -1   0  -9    0.13    0.14
  -1   0  -9    0.08    0.10
  -1   0  -9    0.34    0.19
   1   0  10    4.94    0.51
   1   0  10    4.83    0.33
  -1   0 -10    6.04    0.50
  -1   0 -10    4.21    0.40
  -1   0 -10    5.15    0.70
   1   0  11    0.06    0.16
   1   0  11    0.11    0.13
  -1   0 -11    0.03    0.26
  -1   0 -11    0.07    0.16
  -1   0 -11    0.01    0.12
   1   0  12    3.11    0.36
  -1   0 -12    2.75    0.30
  -1   0 -12    2.85    0.45
   1   0  13    0.07    0.10
  -1   0 -13   -0.00    0.14
  -1   0 -13   -0.04    0.08
   1   0  14    0.26    0.11
  -1   0 -14    0.12    0.15
   1   0  15   -0.02    0.08
  -1   0 -15    0.17    0.12
   1   1 -16    2.87    0.32
   1  -1 -16    0.99    0.29
  -1   1  16    2.22    0.26
  -1  -1  16    3.01    0.24
   1   1 -15    0.40    0.22
   1  -1 -15    0.42    0.22
   1  -1 -15    0.25    0.11
  -1  -1  15    0.73    0.18
  -1   1  15    0.78    0.18
   1  -1 -14    3.83    0.47
   1   1 -14    3.78    0.52
   1  -1 -14    3.71    0.28
  -1   1  14    4.41    0.33
  -1  -1  14    4.76    0.43
   1  -1 -13    0.01    0.14
   1  -1 -13    0.07    0.11
   1   1 -13    0.01    0.16
   1   1 -13   -0.01    0.09
  -1  -1  13    0.02    0.13
  -1   1  13    0.11    0.13
   1   1 -12    0.72    0.30
   1  -1 -12    0.74    0.24
   1   1 -12    0.61    0.17
  -1   1  12    0.66    0.25
  -1  -1  12    0.68    0.20
  -1   1  12    0.58    0.25
  -1  -1  12    0.45    0.28
   1   1 -11    0.16    0.21
   1  -1 -11    0.26    0.20
   1   1 -11    0.21    0.25
   1   1 -11    0.22    0.13
   1  -1 -11    0.15    0.19
   1  -1 -11    0.05    0.14
  -1  -1  11    0.18    0.17
  -1  -1  11    0.12    0.13
  -1  -1  11    0.13    0.23
  -1   1  11    0.58    0.19
   1  -1 -10   71.18    3.14
   1   1 -10   68.00    2.82
   1  -1 -10   64.10    2.72
   1  -1 -10   65.50    3.12
   1   1 -10   68.03    2.98
   1   1 -10   68.50    3.40
  -1  -1  10   66.40    2.82
  -1   1  10   65.77    3.29
  -1  -1  10   68.63    3.35
  -1  -1  10   72.48    2.88
   1  -1  -9    9.34    0.70
   1  -1  -9   10.26    0.55
   1  -1  -9   10.00    0.75
   1   1  -9    9.89    0.60
   1  -1  -9    9.05    0.48
   1   1  -9   10.81    0.67
   1  -1  -9    8.92    0.47
   1   1  -9    9.18    0.41
  -1  -1   9    9.50    0.70
  -1   1   9    9.93    0.68
  -1  -1   9    8.84    0.45
   1  -1  -8    7.88    0.37
   1   1  -8    8.75    0.47
   1  -1  -8    9.27    0.42
   1   1  -8    9.69    0.76
   1   1  -8    7.96    0.33
   1   1  -8    7.25    0.36
   1   1  -8    8.36    0.56
   1  -1  -8    9.54    0.60
   1  -1  -8    8.84    0.73
   1  -1  -8    8.18    0.39
  -1  -1   8    8.32    0.39
  -1  -1   8    9.30    0.61
  -1   1   8    9.46    0.62
   1  -1  -7   36.73    1.32
   1  -1  -7   36.33    1.48
   1   1  -7   42.00    1.40
   1   1  -7   39.65    1.67
   1  -1  -7   38.58    1.31
   1  -1  -7   34.99    1.18
   1  -1  -7   39.15    1.87
   1   1  -7   34.86    1.75
  -1   1   7   39.32    1.66
  -1   1   7   38.20    1.19
  -1  -1   7   39.44    1.71
  -1  -1   7   38.22    1.29
   1  -1  -6  441.29   29.60
   1   1  -6  425.08   29.68
   1  -1  -6  423.39   29.70
  -1  -1   6  424.55   28.12
  -1  -1   6  445.31   30.26
  -1   1   6  454.05   30.68
  -1   1   6  426.33   27.65
   1   1  -5  381.78   24.31
   1  -1  -5  375.95   24.35
   1  -1  -5  361.11   22.37
  -1   1   5  374.04   23.55
  -1   1   5  358.40   21.50
  -1  -1   5  373.94   23.01
  -1  -1   5  358.07   22.60
   1  -1  -4  143.09    6.42
   1   1  -4  150.47    7.10
  -1  -1   4  143.40    6.55
  -1  -1   4  159.20    7.45
  -1   1   4  152.78    7.04
   1  -1  -3  491.55   32.45
   1  -1  -3  483.24   32.48
  -1  -1   3  433.27   29.32
  -1  -1   3  491.18   33.06
   1  -1  -2  191.29    8.68
   1  -1  -2  159.96    6.97
  -1  -1   2  175.97    7.91
  -1  -1   2  229.60   10.34
   1  -1   1  177.70    7.67
   1  -1   1  168.80    7.13
   1   1   1  139.92    5.95
  -1   1  -1  158.23    6.84
  -1  -1  -1  178.90    7.85
  -1  -1  -1  151.45    6.41
   1  -1   2  251.03   13.45
   1   1   2  229.56   12.16
   1  -1   2  263.34   13.58
  -1  -1  -2  285.26   15.44
  -1   1  -2  324.85   17.14
   1  -1   3  474.36   32.13
   1  -1   3  502.15   35.07
   1   1   3  528.21   36.38
  -1   1  -3  576.42   40.19
  -1  -1  -3  511.39   36.13
   1  -1   4   30.58    1.13
   1   1   4   31.56    1.02
  -1   1  -4   31.35    1.12
  -1  -1  -4   32.23    1.15
   1   1   5   17.21    0.71
   1  -1   5   16.47    0.72
  -1   1  -5   17.65    0.80
  -1  -1  -5   15.52    0.80
   1   1   6    0.61    0.19
   1  -1   6    1.06    0.16
  -1  -1  -6    0.63    0.10
  -1  -1  -6    0.56    0.23
  -1   1  -6    0.68    0.22
  -1  -1  -6    0.62    0.11
  -1   1  -6    0.88    0.14
   1  -1   7   44.59    1.48
   1   1   7   46.06    2.02
   1  -1   7   44.66    1.58
   1  -1   7   47.71    1.96
  -1  -1  -7   48.68    1.83
  -1   1  -7   46.25    2.09
  -1   1  -7   47.32    1.83
  -1   1  -7   45.67    1.59
  -1  -1  -7   43.97    2.03
  -1  -1  -7   46.56    1.66
  -1  -1  -7   46.20    1.70
   1  -1   8    0.36    0.12
   1  -1   8    0.39    0.23
   1  -1   8    0.38    0.10
   1   1   8    0.29    0.22
  -1   1  -8    0.45    0.22
  -1  -1  -8    0.29    0.16
  -1   1  -8    0.26    0.11
  -1  -1  -8    0.47    0.15
  -1  -1  -8    0.65    0.18
  -1  -1  -8    0.40    0.13
  -1   1  -8    0.23    0.18
   1  -1   9    0.70    0.14
   1  -1   9    0.70    0.29
   1  -1   9    0.78    0.18
   1   1   9    0.74    0.28
  -1   1  -9    0.52    0.31
  -1  -1  -9    0.62    0.30
  -1  -1  -9    0.73    0.18
  -1   1  -9    0.80    0.16
  -1  -1  -9    0.67    0.18
  -1  -1  -9    0.62    0.19
  -1   1  -9    0.52    0.25
   1  -1  10    0.30    0.25
   1  -1  10    0.19    0.16
   1   1  10    0.24    0.22
   1   1  10    0.27    0.12
  -1   1 -10   -0.01    0.29
  -1   1 -10    0.14    0.13
  -1  -1 -10    0.06    0.29
  -1  -1 -10    0.72    0.17
  -1   1 -10    0.33    0.21
  -1  -1 -10    0.19    0.20
   1  -1  11    1.48    0.31
   1  -1  11    1.51    0.48
   1   1  11    1.52    0.30
   1   1  11    1.42    0.43
  -1  -1 -11    1.87    0.30
  -1  -1 -11    2.36    0.36
  -1   1 -11    2.10    0.39
  -1   1 -11    1.24    0.57
  -1   1 -11    1.70    0.19
   1   1  12    4.89    0.33
   1  -1  12    4.58    0.43
  -1  -1 -12    4.48    0.40
  -1   1 -12    5.02    0.47
  -1  -1 -12    5.08    0.51
  -1   1 -12    3.93    0.32
   1   1  13    0.73    0.20
   1  -1  13    0.77    0.16
  -1  -1 -13    0.51    0.27
  -1   1 -13    0.85    0.29
  -1  -1 -13    0.47    0.18
   1   1  14    1.42    0.17
   1  -1  14    1.33    0.23
  -1   1 -14    1.29    0.31
  -1  -1 -14    0.92    0.18
  -1  -1 -14    1.39    0.30
   1  -1  15    0.06    0.08
   1   1  15    0.07    0.07
  -1   1 -15    0.19    0.14
  -1  -1 -15    0.01    0.12
   1   2 -16    0.56    0.15
  -1  -2  16    0.05    0.10
  -1   2  16    0.11    0.11
   1  -2 -15    1.82    0.28
   1  -2 -15    2.93    0.35
   1   2 -15    3.21    0.43
  -1  -2  15    3.64    0.33
  -1   2  15    3.62    0.32
   1   2 -14    1.21    0.27
   1  -2 -14    1.07    0.28
   1  -2 -14    0.96    0.23
  -1  -2  14    1.25    0.22
  -1   2  14    1.36    0.21
   1   2 -13    0.99    0.35
   1  -2 -13    0.95    0.27
   1  -2 -13    1.15    0.20
  -1  -2  13    1.08    0.28
  -1   2  13    1.21    0.20
   1  -2 -12   57.49    2.80
   1   2 -12   66.29    3.46
   1  -2 -12   61.30    3.01
   1  -2 -12   64.68    3.08
  -1  -2  12   60.12    2.72
  -1   2  12   60.10    3.33
  -1  -2  12   64.07    3.33
  -1  -2  12   69.61    3.04
   1   2 -11   24.13    1.01
   1  -2 -11   25.64    1.35
   1   2 -11   29.11    1.53
   1  -2 -11   26.92    1.18
   1   2 -11   26.26    1.61
   1  -2 -11   25.24    1.45
  -1  -2  11   28.15    1.33
  -1  -2  11   25.72    1.21
  -1  -2  11   28.22    1.62
  -1   2  11   25.70    1.49
   1   2 -10    6.99    0.36
   1  -2 -10    7.42    0.48
   1   2 -10    8.88    0.69
   1  -2 -10    7.05    0.54
   1   2 -10    5.37    0.61
   1  -2 -10    6.43    0.44
  -1   2  10    6.90    0.65
  -1  -2  10    7.82    0.63
  -1  -2  10    8.07    0.50
  -1  -2  10    6.88    0.47
   1   2  -9   11.15    0.76
   1  -2  -9   10.24    0.56
   1  -2  -9   11.43    0.55
   1   2  -9   10.61    0.42
   1   2  -9   11.32    0.63
   1  -2  -9    9.24    0.51
  -1   2   9   11.64    0.74
  -1  -2   9   11.08    0.71
  -1  -2   9   11.33    0.52
  -1  -2   9    9.99    0.56
   1   2  -8    9.61    0.58
   1  -2  -8    8.43    0.43
   1  -2  -8    8.72    0.77
   1   2  -8    9.15    0.83
   1  -2  -8    8.89    0.43
   1  -2  -8    8.91    0.33
   1  -2  -8    8.69    0.57
   1   2  -8    8.49    0.32
   1   2  -8    9.05    0.52
  -1  -2   8    8.67    0.37
  -1  -2   8    8.65    0.44
  -1   2   8    9.09    0.50
  -1  -2   8    8.66    0.59
   1  -2  -7   53.25    1.87
   1   2  -7   53.20    2.46
   1  -2  -7   48.82    2.09
   1   2  -7   52.49    1.88
   1  -2  -7   50.47    1.74
   1  -2  -7   51.26    2.40
   1  -2  -7   50.44    1.77
  -1   2   7   51.05    1.63
  -1   2   7   53.71    2.11
  -1  -2   7   51.59    1.93
  -1  -2   7   52.54    2.11
  -1  -2   7   51.31    1.90
   1  -2  -6    5.17    0.35
   1  -2  -6    6.54    0.55
   1   2  -6    5.36    0.41
  -1  -2   6    5.75    0.46
  -1  -2   6    7.66    0.32
  -1   2   6    6.33    0.46
   1  -2  -5   16.42    0.78
   1  -2  -5   19.28    0.68
   1   2  -5   19.69    0.88
  -1   2   5   20.34    0.81
  -1  -2   5   20.42    0.82
  -1  -2   5   20.47    0.72
   1  -2  -4  242.82   12.60
   1   2  -4  240.74   13.05
   1  -2  -4  239.31   12.61
   1  -2  -4  243.70   13.34
  -1  -2   4  247.65   13.11
  -1  -2   4  230.60   12.30
   1  -2  -3  476.63   34.39
   1  -2  -3  523.99   36.73
  -1  -2   3  706.58   49.69
  -1  -2   3  564.26   40.05
   1  -2  -2   24.36    0.55
   1  -2  -2   22.90    0.68
  -1  -2   2   23.14    0.67
  -1  -2   2   22.61    0.62
   1  -2  -1   71.43    2.55
  -1  -2   1   71.27    2.35
  -1  -2   1   78.17    2.74
  -1  -2   1   74.76    2.58
   1  -2   0    4.44    0.17
   1  -2   0    3.93    0.19
  -1  -2   0    4.62    0.22
  -1  -2   0    4.98    0.18
  -1  -2   0    4.21    0.12
   1  -2   1  142.15    6.18
   1  -2   1  141.38    6.04
  -1  -2  -1  146.59    6.24
  -1  -2  -1  156.09    6.93
  -1  -2  -1  141.05    5.89
   1  -2   2   16.29    0.60
   1  -2   2   16.49    0.48
  -1  -2  -2   16.42    0.64
  -1  -2  -2   16.26    0.44
   1   2   3  104.74    4.09
   1  -2   3   94.23    3.91
   1  -2   3  102.87    3.91
  -1  -2  -3   97.06    4.11
   1   2   4    0.43    0.09
   1  -2   4    0.34    0.07
   1  -2   4    0.25    0.14
  -1   2  -4    0.35    0.14
  -1  -2  -4    0.48    0.15
   1   2   5    0.67    0.16
   1  -2   5    0.80    0.07
   1  -2   5    0.40    0.19
  -1   2  -5    0.61    0.17
  -1  -2  -5    0.82    0.21
   1  -2   6    0.70    0.09
   1  -2   6    0.55    0.19
   1   2   6    0.64    0.18
  -1  -2  -6    0.50    0.10
  -1  -2  -6    0.47    0.22
  -1  -2  -6    0.51    0.12
  -1   2  -6    0.62    0.22
  -1   2  -6    0.46    0.10
   1   2   7    0.66    0.17
   1  -2   7    0.24    0.09
   1  -2   7    0.15    0.11
   1  -2   7    0.16    0.18
  -1  -2  -7    0.18    0.10
  -1  -2  -7    0.27    0.18
  -1   2  -7    0.24    0.18
  -1   2  -7    0.14    0.11
  -1   2  -7    0.07    0.07
  -1  -2  -7    0.43    0.12
   1   2   8   54.43    2.56
   1  -2   8   53.96    2.14
   1  -2   8   56.41    2.21
   1  -2   8   49.92    2.62
  -1  -2  -8   63.16    2.49
  -1  -2  -8   57.85    2.30
  -1  -2  -8   51.96    2.67
  -1  -2  -8   55.42    2.32
  -1   2  -8   57.06    2.56
  -1   2  -8   53.58    2.00
  -1   2  -8   58.76    2.52
   1   2   9   19.24    1.15
   1  -2   9   19.60    0.80
   1  -2   9   19.33    0.84
   1  -2   9   18.51    1.19
  -1  -2  -9   18.77    1.34
  -1  -2  -9   19.36    0.93
  -1   2  -9   17.69    0.68
  -1  -2  -9   18.99    1.00
  -1   2  -9   21.93    1.12
  -1   2  -9   19.11    1.22
  -1  -2  -9   18.17    0.82
   1  -2  10   10.23    0.54
   1  -2  10   10.51    0.94
   1  -2  10   11.33    0.68
   1   2  10   10.05    0.75
  -1  -2 -10   11.76    1.11
  -1  -2 -10   10.72    0.72
  -1   2 -10   11.23    0.89
  -1   2 -10   11.06    0.87
  -1  -2 -10   11.35    0.70
   1   2  11    3.83    0.31
   1   2  11    1.43    0.53
   1  -2  11    4.30    0.55
   1  -2  11    3.75    0.29
   1  -2  11    4.48    0.37
  -1  -2 -11    4.08    0.45
  -1   2 -11    3.86    0.76
  -1   2 -11    4.59    0.58
  -1  -2 -11    4.11    0.45
   1   2  12   12.14    0.59
   1  -2  12   12.64    0.74
  -1  -2 -12   11.06    0.71
  -1  -2 -12   11.59    0.68
  -1   2 -12   12.01    0.98
   1   2  13    0.68    0.18
   1  -2  13    0.64    0.18
  -1  -2 -13    0.57    0.24
  -1  -2 -13    0.57    0.19
  -1   2 -13    0.75    0.30
   1   2  14    0.50    0.15
   1  -2  14    0.85    0.18
  -1  -2 -14    0.56    0.19
  -1  -2 -14    0.30    0.15
  -1   2 -14    0.45    0.24
   1  -2  15    0.33    0.12
   1   2  15    0.30    0.09
  -1   2 -15    0.62    0.19
   1   3 -16    0.20    0.10
  -1  -3  16    0.03    0.06
  -1   3  16   -0.10    0.06
   1  -3 -15    0.25    0.14
   1   3 -15    0.40    0.21
  -1  -3  15    0.38    0.16
  -1   3  15    0.27    0.14
   1   3 -14    2.49    0.42
   1  -3 -14    2.59    0.34
   1  -3 -14    2.67    0.32
  -1  -3  14    2.97    0.28
  -1   3  14    2.48    0.32
   1  -3 -13   22.26    1.22
   1  -3 -13   24.77    1.21
   1   3 -13   25.85    1.27
  -1  -3  13   26.08    1.34
  -1  -3  13   23.19    1.03
   1   3 -12    5.50    0.55
   1  -3 -12    6.37    0.50
   1   3 -12    4.58    0.88
   1  -3 -12    6.13    0.46
   1  -3 -12    7.38    0.66
  -1  -3  12    5.69    0.47
  -1  -3  12    5.99    0.55
  -1  -3  12    6.77    0.84
  -1   3  12    3.83    0.75
   1   3 -11    1.11    0.32
   1   3 -11    0.76    0.37
   1  -3 -11    1.24    0.27
   1  -3 -11    0.78    0.22
   1  -3 -11    0.91    0.23
  -1  -3  11    0.85    0.20
  -1   3  11    0.94    0.32
  -1  -3  11    0.67    0.25
  -1  -3  11    1.11    0.30
   1   3 -10   76.23    3.96
   1   3 -10   77.35    3.75
   1  -3 -10   77.14    3.36
   1  -3 -10   71.89    3.35
   1  -3 -10   73.34    3.49
  -1  -3  10   76.90    3.33
  -1  -3  10   76.80    3.71
  -1   3  10   73.75    3.57
  -1  -3  10   80.67    3.40
   1  -3  -9    2.17    0.21
   1   3  -9    1.99    0.24
   1  -3  -9    1.86    0.23
   1  -3  -9    2.44    0.22
   1   3  -9    2.42    0.30
  -1  -3   9    2.12    0.22
  -1  -3   9    2.25    0.28
  -1  -3   9    2.07    0.35
  -1   3   9    1.53    0.34
   1  -3  -8   29.98    1.07
   1  -3  -8   27.89    1.12
   1   3  -8   30.35    1.13
   1  -3  -8   27.86    1.02
   1  -3  -8   30.94    1.64
  -1  -3   8   27.76    1.13
  -1  -3   8   29.28    0.97
  -1  -3   8   29.22    1.08
  -1  -3   8   30.06    1.28
  -1   3   8   29.55    1.39
   1   3  -7    0.48    0.12
   1   3  -7    0.53    0.20
   1  -3  -7    0.83    0.23
   1  -3  -7    0.48    0.13
   1  -3  -7    0.72    0.08
   1  -3  -7    0.52    0.15
  -1  -3   7    0.67    0.19
  -1  -3   7    0.57    0.14
  -1  -3   7    0.41    0.09
  -1   3   7    0.32    0.06
  -1   3   7    0.94    0.17
  -1  -3   7    0.53    0.15
   1   3  -6   41.26    1.78
   1  -3  -6   40.19    1.30
   1  -3  -6   43.39    1.57
   1  -3  -6   39.54    1.64
  -1  -3   6   41.95    1.76
  -1  -3   6   41.41    1.62
  -1   3   6   40.17    1.55
   1  -3  -5   56.39    2.12
   1   3  -5   49.69    2.01
   1  -3  -5   52.65    2.07
   1  -3  -5   56.09    1.96
  -1  -3   5   53.45    2.06
  -1  -3   5   51.56    1.96
   1  -3  -4  124.22    5.46
   1  -3  -4  123.18    5.47
   1  -3  -4  126.08    5.13
   1   3  -4  115.15    5.04
  -1  -3   4  121.65    5.34
  -1  -3   4  117.32    5.19
   1   3  -3   16.99    0.54
   1  -3  -3   17.97    0.48
   1  -3  -3   16.98    0.65
  -1  -3   3   16.05    0.58
  -1  -3   3   16.78    0.64
   1  -3  -2   16.09    0.59
  -1  -3   2   15.41    0.49
  -1  -3   2   16.17    0.60
   1  -3  -1   62.53    2.27
   1  -3  -1   67.72    2.38
  -1  -3   1   63.22    2.34
  -1  -3   1   62.55    2.35
  -1  -3   1   60.23    2.07
   1  -3   0  126.35    5.53
   1  -3   0  124.69    5.24
  -1  -3   0  125.73    5.14
  -1  -3   0  124.62    5.36
  -1  -3   0  122.45    5.35
   1  -3   1    4.33    0.30
   1  -3   1    4.46    0.24
  -1  -3  -1    4.41    0.20
  -1  -3  -1    3.92    0.29
  -1  -3  -1    5.00    0.22
   1  -3   2   14.10    0.48
   1  -3   2   13.96    0.52
  -1  -3  -2   13.41    0.43
  -1  -3  -2   13.48    0.55
  -1  -3  -2   12.70    0.40
   1  -3   3  110.36    4.55
   1  -3   3  104.72    4.64
  -1  -3  -3  107.63    4.76
  -1  -3  -3  110.92    4.38
   1  -3   4    0.56    0.11
   1   3   4    0.55    0.14
   1  -3   4    0.68    0.20
  -1  -3  -4    0.54    0.19
   1   3   5   27.91    1.07
   1  -3   5   28.28    0.91
   1  -3   5   30.45    1.21
  -1  -3  -5   27.82    1.36
  -1   3  -5   27.30    1.17
   1   3   6    9.76    0.56
   1  -3   6   10.40    0.68
   1  -3   6   10.28    0.37
   1  -3   6   10.20    0.45
   1  -3   6   10.65    0.40
  -1  -3  -6   10.15    0.45
  -1   3  -6   10.04    0.46
  -1   3  -6    9.98    0.64
  -1  -3  -6    9.20    0.71
  -1  -3  -6    9.68    0.36
   1  -3   7   61.61    2.90
   1  -3   7   60.38    2.42
   1   3   7   62.21    2.78
   1  -3   7   60.85    2.34
  -1  -3  -7   57.36    2.83
  -1  -3  -7   63.30    2.40
  -1   3  -7   61.00    2.87
  -1  -3  -7   60.99    2.31
  -1   3  -7   61.21    2.51
  -1  -3  -7   58.93    2.36
   1   3   8   18.77    1.04
   1  -3   8   20.09    1.20
   1  -3   8   19.90    0.89
   1  -3   8   20.31    0.85
  -1  -3  -8   22.06    0.83
  -1  -3  -8   20.66    0.81
  -1  -3  -8   19.79    0.92
  -1  -3  -8   18.85    1.24
  -1   3  -8   20.19    0.89
  -1   3  -8   19.98    1.16
   1  -3   9   29.67    1.29
   1  -3   9   28.38    1.69
   1   3   9   26.61    1.40
  -1  -3  -9   28.00    1.77
  -1  -3  -9   28.82    1.23
  -1   3  -9   28.29    1.62
  -1  -3  -9   29.88    1.27
  -1   3  -9   28.12    1.31
  -1  -3  -9   27.09    1.33
   1  -3  10    0.63    0.16
   1  -3  10    0.10    0.15
   1  -3  10   -0.17    0.23
   1   3  10    0.23    0.23
  -1  -3 -10    0.42    0.16
  -1  -3 -10    0.31    0.17
  -1   3 -10    0.25    0.30
  -1   3 -10    0.23    0.19
  -1  -3 -10    0.06    0.16
   1   3  11   46.38    2.39
   1  -3  11   46.62    2.07
   1  -3  11   49.54    2.69
   1  -3  11   53.90    2.36
  -1   3 -11   51.04    2.72
  -1  -3 -11   50.04    2.29
  -1   3 -11   49.63    3.04
  -1  -3 -11   46.83    2.15
   1   3  12    1.42    0.27
   1  -3  12    1.90    0.33
   1  -3  12    1.23    0.18
  -1  -3 -12    1.47    0.29
  -1   3 -12    1.47    0.38
  -1  -3 -12    1.72    0.29
   1   3  13   -0.03    0.11
   1  -3  13   -0.08    0.14
  -1  -3 -13    0.22    0.11
  -1   3 -13    0.22    0.18
  -1  -3 -13    0.05    0.13
   1   3  14    0.24    0.13
   1  -3  14    0.28    0.16
  -1  -3 -14    0.35    0.15
  -1   3 -14    0.50    0.19
   1   3  15    0.13    0.09
   1  -3  15    0.13    0.09
  -1   3 -15    0.46    0.16
   1   4 -15    0.71    0.20
   1  -4 -15    0.56    0.16
  -1   4  15    0.58    0.14
  -1  -4  15    0.37    0.13
   1   4 -14   -0.02    0.13
   1  -4 -14   -0.03    0.10
  -1   4  14   -0.04    0.10
  -1  -4  14    0.08    0.10
  -1  -4  14   -0.02    0.07
   1  -4 -13    0.89    0.22
   1   4 -13    1.20    0.25
   1  -4 -13    1.00    0.28
  -1  -4  13    0.95    0.20
  -1  -4  13    0.87    0.25
   1  -4 -12   15.40    0.78
   1   4 -12   12.84    1.32
   1  -4 -12   15.24    0.88
   1  -4 -12   14.22    0.91
   1   4 -12   14.74    0.99
  -1  -4  12   13.88    0.82
  -1  -4  12   13.74    1.34
  -1   4  12   13.56    0.92
  -1  -4  12   16.39    0.89
   1   4 -11    1.67    0.42
   1  -4 -11    2.09    0.26
   1  -4 -11    2.32    0.38
   1  -4 -11    2.61    0.31
   1   4 -11    2.38    0.34
  -1  -4  11    1.76    0.55
  -1  -4  11    2.66    0.30
  -1  -4  11    1.93    0.32
  -1   4  11    2.33    0.38
   1  -4 -10    7.30    0.43
   1   4 -10    7.70    0.52
   1  -4 -10    8.21    0.59
   1  -4 -10    7.36    0.50
   1   4 -10    7.82    0.76
  -1  -4  10    7.32    0.78
  -1  -4  10    8.40    0.52
  -1  -4  10    7.74    0.64
  -1   4  10    8.29    0.61
   1  -4  -9    0.60    0.14
   1   4  -9    0.52    0.16
   1   4  -9    0.24    0.25
   1  -4  -9    0.45    0.13
   1  -4  -9    0.31    0.16
  -1  -4   9    0.53    0.20
  -1  -4   9    0.61    0.13
  -1  -4   9    0.56    0.22
  -1   4   9    0.75    0.19
   1   4  -8    2.03    0.25
   1  -4  -8    1.96    0.21
   1  -4  -8    2.37    0.19
   1  -4  -8    2.04    0.20
  -1  -4   8    1.79    0.29
  -1  -4   8    2.78    0.35
  -1  -4   8    2.19    0.23
  -1  -4   8    2.25    0.19
  -1   4   8    1.83    0.35
   1   4  -7   70.27    2.77
   1  -4  -7   66.04    3.08
   1  -4  -7   64.71    2.59
   1  -4  -7   68.00    2.42
  -1  -4   7   63.62    2.99
  -1  -4   7   68.41    2.90
  -1   4   7   73.00    3.05
  -1  -4   7   63.45    2.43
  -1  -4   7   66.23    2.73
   1  -4  -6   29.77    1.00
   1   4  -6   29.83    1.30
   1  -4  -6   30.27    0.90
   1  -4  -6   28.13    0.98
   1  -4  -6   30.43    1.36
   1   4  -6   28.42    0.97
  -1  -4   6   29.02    1.21
  -1  -4   6   28.08    1.35
  -1  -4   6   28.45    1.05
  -1  -4   6   26.06    0.84
   1  -4  -5   39.03    1.31
   1  -4  -5   38.18    1.56
   1   4  -5   36.47    1.46
   1  -4  -5   38.17    1.62
  -1  -4   5   37.48    1.57
  -1  -4   5   36.04    1.60
   1  -4  -4  307.57   18.08
   1  -4  -4  298.08   17.53
   1  -4  -4  310.66   17.42
   1   4  -4  287.94   16.71
  -1  -4   4  287.30   17.12
  -1  -4   4  304.60   18.16
   1   4  -3   15.53    0.50
   1  -4  -3   16.14    0.69
   1  -4  -3   16.67    0.50
   1  -4  -3   16.45    0.60
  -1  -4   3   16.55    0.65
  -1  -4   3   19.19    0.68
   1   4  -2   16.42    0.44
   1  -4  -2   17.33    0.59
   1  -4  -2   16.85    0.71
  -1  -4   2   16.58    0.72
  -1  -4   2   18.85    0.66
   1  -4  -1    1.28    0.19
   1  -4  -1    1.09    0.15
  -1  -4   1    0.98    0.21
  -1  -4   1    1.30    0.13
   1  -4   0  319.08   19.43
   1  -4   0  328.28   19.63
  -1  -4   0  336.20   20.34
  -1  -4   0  314.44   18.54
  -1  -4   0  392.81   23.32
   1  -4   1   28.81    1.14
   1  -4   1   28.39    1.07
  -1  -4  -1   31.40    0.98
  -1  -4  -1   28.67    1.10
  -1  -4  -1   29.51    1.08
   1  -4   2   50.69    2.13
   1  -4   2   49.48    1.91
  -1  -4  -2   53.58    1.97
  -1  -4  -2   52.01    1.82
  -1  -4  -2   53.18    2.10
   1  -4   3  289.16   16.80
   1  -4   3  283.16   16.78
  -1  -4  -3  299.13   17.14
  -1  -4  -3  300.27   17.06
  -1  -4  -3  294.01   17.41
   1   4   4    7.10    0.39
   1  -4   4    6.63    0.46
   1  -4   4    7.19    0.37
  -1  -4  -4    7.02    0.51
   1  -4   5  108.20    4.42
   1  -4   5  108.25    5.17
   1  -4   5  101.59    4.28
   1  -4   5  105.79    4.54
   1   4   5  105.10    4.65
  -1  -4  -5  104.55    4.92
  -1   4  -5   99.49    4.15
  -1  -4  -5  103.66    4.23
   1  -4   6   65.38    2.40
   1  -4   6   66.38    2.65
   1   4   6   67.00    2.80
   1  -4   6   64.59    2.50
   1  -4   6   66.88    3.15
  -1  -4  -6   61.81    2.93
  -1   4  -6   62.31    2.89
  -1  -4  -6   69.24    2.40
  -1  -4  -6   65.98    2.62
  -1   4  -6   62.90    2.53
   1   4   7    0.29    0.15
   1  -4   7    0.25    0.11
   1  -4   7    0.22    0.14
   1  -4   7    0.14    0.21
  -1  -4  -7    0.16    0.18
  -1  -4  -7    0.21    0.10
  -1  -4  -7    0.23    0.11
  -1   4  -7    0.24    0.14
  -1   4  -7    0.18    0.21
  -1  -4  -7    0.28    0.08
   1  -4   8    5.14    0.44
   1  -4   8    5.87    0.52
   1   4   8    5.41    0.50
   1  -4   8    5.10    0.40
  -1  -4  -8    4.97    0.64
  -1  -4  -8    5.15    0.38
  -1  -4  -8    5.61    0.32
  -1  -4  -8    4.77    0.42
  -1   4  -8    4.66    0.59
  -1   4  -8    5.52    0.45
   1  -4   9    8.55    0.88
   1   4   9    8.29    0.66
   1  -4   9    8.73    0.60
   1  -4   9    9.79    0.60
  -1  -4  -9    8.45    0.46
  -1  -4  -9    8.17    0.49
  -1  -4  -9    9.19    0.62
  -1   4  -9    8.79    0.79
  -1   4  -9    9.01    0.72
   1   4  10    7.81    0.70
   1  -4  10    8.92    0.92
   1  -4  10    8.86    0.67
   1  -4  10    8.48    0.59
  -1  -4 -10    9.73    0.71
  -1  -4 -10    8.55    0.59
  -1  -4 -10    9.07    0.54
  -1   4 -10    8.09    0.65
  -1   4 -10    8.47    0.90
   1  -4  11    0.28    0.17
   1  -4  11    0.27    0.29
   1  -4  11    0.44    0.18
   1   4  11    0.28    0.26
  -1  -4 -11    0.22    0.17
  -1  -4 -11    0.44    0.22
  -1   4 -11    0.11    0.29
  -1  -4 -11    0.40    0.13
  -1   4 -11    0.32    0.26
   1   4  12   17.88    0.84
   1  -4  12   19.08    1.05
   1  -4  12   17.34    0.75
  -1  -4 -12   18.51    1.04
  -1   4 -12   19.64    1.22
   1   4  13    2.41    0.24
   1  -4  13    1.95    0.33
  -1  -4 -13    1.91    0.31
  -1   4 -13    2.48    0.41
   1   4  14    0.38    0.12
   1  -4  14    0.40    0.17
  -1  -4 -14    0.35    0.15
  -1   4 -14    0.54    0.20
   1  -4  15    4.09    0.23
  -1   4 -15    3.78    0.36
   1   5 -15    2.29    0.27
   1  -5 -15    1.28    0.23
  -1   5  15    1.26    0.19
   1   5 -14    5.25    0.48
   1  -5 -14    4.66    0.41
  -1  -5  14    4.63    0.39
  -1  -5  14    4.17    0.33
  -1   5  14    4.56    0.34
   1  -5 -13    4.10    0.38
   1  -5 -13    3.88    0.49
   1   5 -13    4.16    0.37
  -1  -5  13    3.61    0.29
  -1  -5  13    3.75    0.39
   1  -5 -12    4.05    0.44
   1   5 -12    3.50    0.48
   1  -5 -12    4.25    0.39
  -1  -5  12    4.51    0.41
  -1  -5  12    3.60    0.40
   1   5 -11    0.33    0.38
   1   5 -11    0.81    0.22
   1  -5 -11    0.48    0.27
   1  -5 -11    0.69    0.23
  -1  -5  11    1.13    0.23
  -1  -5  11    0.57    0.28
  -1  -5  11    0.67    0.40
  -1   5  11    0.55    0.31
   1   5 -10    7.49    0.66
   1   5 -10    7.20    0.60
   1  -5 -10    6.70    0.51
   1  -5 -10    7.35    0.61
  -1   5  10    7.89    0.62
  -1  -5  10    5.54    0.83
  -1  -5  10    7.97    0.64
  -1  -5  10    6.97    0.52
   1   5  -9   24.60    1.16
   1  -5  -9   24.94    1.24
   1   5  -9   23.69    1.37
   1  -5  -9   25.99    1.11
  -1  -5   9   25.02    1.08
  -1  -5   9   25.35    1.27
  -1  -5   9   25.21    1.47
  -1   5   9   23.81    1.31
   1  -5  -8    5.92    0.39
   1  -5  -8    6.13    0.31
   1   5  -8    5.79    0.41
  -1  -5   8    6.21    0.50
  -1  -5   8    6.13    0.49
  -1  -5   8    6.36    0.37
  -1  -5   8    5.91    0.60
  -1   5   8    6.72    0.46
   1   5  -7   20.23    0.80
   1  -5  -7   20.49    0.84
   1  -5  -7   20.10    0.64
  -1  -5   7   19.77    0.90
  -1  -5   7   21.26    1.03
  -1  -5   7   20.56    0.68
  -1   5   7   20.07    0.92
  -1  -5   7   19.11    1.11
  -1  -5   7   19.52    0.75
   1  -5  -6   71.72    2.66
   1   5  -6   75.17    2.93
   1  -5  -6   75.10    2.93
   1  -5  -6   77.16    3.39
   1  -5  -6   81.16    3.63
  -1  -5   6   75.71    3.38
  -1  -5   6   74.33    3.27
  -1  -5   6   75.23    2.84
  -1  -5   6   77.99    3.01
  -1  -5   6   71.16    2.66
   1  -5  -5   57.56    2.50
   1  -5  -5   57.65    1.93
   1  -5  -5   57.27    2.03
   1  -5  -5   58.59    2.44
  -1  -5   5   58.13    2.06
  -1  -5   5   58.14    2.50
  -1  -5   5   55.94    1.99
  -1  -5   5   56.40    2.52
   1  -5  -4    6.58    0.28
   1  -5  -4    7.03    0.39
   1  -5  -4    6.08    0.34
  -1  -5   4    7.21    0.51
  -1  -5   4    6.22    0.46
   1  -5  -3  225.90   11.85
   1  -5  -3  236.57   13.03
  -1  -5   3  236.68   13.01
  -1  -5   3  234.17   12.84
   1  -5  -2   65.55    2.74
   1  -5  -2   70.79    2.75
   1  -5  -2   63.82    2.18
  -1  -5   2   65.23    2.76
  -1  -5   2   68.50    2.64
   1  -5  -1   65.52    2.56
   1  -5  -1   63.59    2.06
   1  -5  -1   63.91    2.66
  -1  -5   1   69.47    2.79
  -1  -5   1   66.17    2.46
   1  -5   0    1.40    0.26
   1  -5   0    1.46    0.22
  -1  -5   0    1.75    0.24
  -1  -5   0    1.51    0.16
  -1  -5   0    1.76    0.26
   1  -5   1   61.93    2.54
   1  -5   1   63.46    2.74
  -1  -5  -1   63.76    2.62
  -1  -5  -1   62.96    2.32
  -1  -5  -1   63.48    2.56
   1  -5   2    4.19    0.32
   1  -5   2    4.51    0.45
  -1  -5  -2    4.52    0.29
  -1  -5  -2    4.72    0.35
  -1  -5  -2    4.97    0.38
   1  -5   3  491.54   37.28
   1  -5   3  540.55   39.74
  -1  -5  -3  528.06   38.25
  -1  -5  -3  577.94   41.74
  -1  -5  -3  545.73   40.30
   1  -5   4  126.47    5.93
   1  -5   4  119.82    5.08
   1  -5   4  117.94    5.10
   1  -5   4  117.97    5.92
  -1  -5  -4  123.26    5.95
  -1  -5  -4  125.13    5.34
   1   5   5    2.12    0.23
   1  -5   5    1.22    0.20
   1  -5   5    1.33    0.13
   1  -5   5    1.17    0.15
   1  -5   5    1.56    0.26
  -1  -5  -5    1.55    0.10
  -1  -5  -5    1.20    0.30
  -1   5  -5    0.87    0.15
   1  -5   6    0.47    0.27
   1   5   6    1.01    0.20
   1  -5   6    0.58    0.16
   1  -5   6    0.68    0.14
   1  -5   6    0.48    0.15
  -1  -5  -6    0.77    0.25
  -1  -5  -6    0.88    0.10
  -1  -5  -6    0.59    0.16
  -1   5  -6    0.43    0.15
   1  -5   7   12.49    0.62
   1   5   7   11.72    0.66
   1  -5   7   11.74    0.93
   1  -5   7   12.60    0.58
  -1  -5  -7   12.60    0.68
  -1   5  -7   11.25    0.66
  -1  -5  -7   10.71    0.74
  -1  -5  -7   11.51    0.43
  -1   5  -7   10.75    0.67
   1  -5   8   23.39    1.09
   1   5   8   22.76    1.20
   1  -5   8   22.98    1.18
   1  -5   8   23.95    1.47
  -1   5  -8   23.00    1.05
  -1  -5  -8   23.45    0.94
  -1  -5  -8   23.68    1.18
  -1   5  -8   22.18    1.39
   1  -5   9   22.54    1.62
   1   5   9   22.62    1.30
   1  -5   9   24.85    1.30
   1  -5   9   24.70    1.20
  -1  -5  -9   24.37    1.32
  -1  -5  -9   26.62    1.23
  -1   5  -9   23.66    1.32
  -1   5  -9   24.12    1.53
   1   5  10   11.77    0.89
   1  -5  10   12.70    0.69
   1  -5  10   12.06    1.17
   1  -5  10   13.30    0.82
  -1  -5 -10   14.54    0.88
  -1  -5 -10   12.30    0.88
  -1   5 -10   13.07    0.80
  -1   5 -10   11.30    0.95
   1  -5  11    0.29    0.18
   1  -5  11    0.19    0.14
  -1  -5 -11   -0.06    0.14
  -1  -5 -11    0.18    0.18
  -1   5 -11    0.25    0.20
   1   5  12    0.05    0.07
   1  -5  12    0.03    0.10
   1  -5  12   -0.03    0.06
  -1   5 -12   -0.08    0.12
  -1  -5 -12    0.03    0.11
   1  -5  13    0.85    0.21
   1   5  13    0.98    0.15
   1  -5  13    0.46    0.11
  -1  -5 -13    0.79    0.22
  -1   5 -13    0.48    0.20
   1   5  14    0.06    0.07
   1  -5  14    0.07    0.10
  -1  -5 -14   -0.02    0.09
  -1   5 -14    0.06    0.12
   1  -6 -15    5.27    0.32
   1   6 -15    5.30    0.41
  -1   6  15    5.55    0.30
   1   6 -14    2.76    0.34
   1  -6 -14    2.85    0.34
  -1   6  14    2.53    0.25
  -1  -6  14    2.65    0.20
  -1  -6  14    2.14    0.28
   1   6 -13    5.27    0.48
   1  -6 -13    4.52    0.54
   1  -6 -13    4.37    0.51
  -1  -6  13    5.41    0.37
  -1  -6  13    5.79    0.44
   1   6 -12    8.73    0.57
   1  -6 -12    8.17    0.72
   1  -6 -12   10.02    0.65
  -1  -6  12    8.04    0.60
  -1  -6  12    8.99    0.66
   1  -6 -11   15.23    0.98
   1   6 -11   14.05    1.08
   1   6 -11   14.25    0.79
   1  -6 -11   14.24    0.89
  -1  -6  11   14.69    0.95
  -1  -6  11   14.49    1.31
  -1  -6  11   14.46    0.81
  -1   6  11   14.11    1.05
   1  -6 -10    3.91    0.33
   1   6 -10    3.23    0.62
   1   6 -10    3.45    0.42
   1  -6 -10    3.61    0.47
  -1   6  10    3.75    0.39
  -1  -6  10    4.27    0.50
  -1  -6  10    3.74    0.38
  -1  -6  10    2.40    0.65
   1   6  -9    6.57    0.43
   1  -6  -9    7.03    0.54
   1  -6  -9    6.95    0.48
  -1  -6   9    6.94    0.46
  -1  -6   9    6.19    0.49
  -1   6   9    6.65    0.61
  -1  -6   9    6.56    0.71
   1  -6  -8   20.88    0.97
   1  -6  -8   17.58    0.67
   1   6  -8   19.13    0.85
  -1  -6   8   20.92    0.94
  -1   6   8   19.16    0.96
  -1  -6   8   21.00    1.13
  -1  -6   8   18.53    0.80
  -1  -6   8   18.59    1.21
   1  -6  -7   32.92    1.32
   1   6  -7   30.01    1.06
   1  -6  -7   31.75    1.05
  -1  -6   7   30.24    1.60
  -1  -6   7   32.98    1.37
  -1  -6   7   29.28    1.12
  -1  -6   7   31.37    1.10
  -1  -6   7   34.64    1.69
  -1   6   7   30.26    1.33
   1  -6  -6   28.12    1.28
   1   6  -6   27.72    0.96
   1  -6  -6   28.71    0.94
   1  -6  -6   29.40    1.08
  -1  -6   6   30.50    1.49
  -1  -6   6   29.43    1.02
  -1  -6   6   30.89    1.20
  -1  -6   6   26.44    1.36
  -1  -6   6   26.49    0.94
   1  -6  -5   11.02    0.61
   1  -6  -5    9.75    0.34
   1  -6  -5   10.22    0.40
  -1  -6   5   11.01    0.70
  -1  -6   5   10.31    0.42
  -1  -6   5   10.22    0.48
  -1  -6   5   10.07    0.41
  -1  -6   5   10.35    0.70
  -1  -6   5   10.06    0.38
   1  -6  -4    8.10    0.53
   1  -6  -4    8.17    0.36
   1  -6  -4    7.83    0.24
  -1  -6   4    7.83    0.32
  -1  -6   4    7.27    0.50
  -1  -6   4    8.01    0.55
  -1  -6   4    7.99    0.29
  -1  -6   4    8.34    0.30
   1  -6  -3   78.57    3.51
  -1  -6   3   80.36    3.48
  -1  -6   3   75.92    3.36
   1  -6  -2    4.92    0.45
   1  -6  -2    4.70    0.34
  -1  -6   2    5.14    0.36
  -1  -6   2    5.33    0.39
   1  -6  -1    4.17    0.32
   1  -6  -1    3.81    0.32
  -1  -6   1    3.44    0.28
  -1  -6   1    4.18    0.42
   1  -6   0   34.13    1.54
   1  -6   0   34.30    1.36
  -1  -6   0   36.42    1.63
  -1  -6   0   37.70    1.43
   1  -6   1   97.78    4.53
  -1  -6  -1  109.16    5.03
  -1  -6  -1  107.90    4.95
  -1  -6  -1  106.34    4.58
   1  -6   2  148.90    7.43
   1  -6   2  133.71    7.14
  -1  -6  -2  157.04    7.38
  -1  -6  -2  157.52    7.77
  -1  -6  -2  156.26    7.66
   1  -6   3    0.43    0.16
   1  -6   3    0.60    0.11
   1  -6   3    0.55    0.19
   1  -6   3    0.46    0.09
  -1  -6  -3    1.18    0.21
  -1  -6  -3    0.50    0.12
  -1  -6  -3    0.65    0.17
   1  -6   4   14.07    0.48
   1  -6   4   14.25    0.76
   1  -6   4   15.06    0.50
   1  -6   4   13.89    0.73
   1  -6   4   14.99    0.59
  -1  -6  -4   15.10    0.52
  -1  -6  -4   14.13    0.38
  -1  -6  -4   14.01    0.76
  -1  -6  -4   14.23    0.62
   1  -6   5   86.76    4.28
   1  -6   5   88.15    3.41
   1  -6   5   90.36    4.01
   1  -6   5   88.21    3.71
   1   6   5   84.34    3.71
   1  -6   5   87.72    3.62
  -1   6  -5   83.25    3.46
  -1  -6  -5   90.14    4.16
  -1  -6  -5   89.25    3.67
  -1  -6  -5   85.77    3.22
   1   6   6    6.20    0.44
   1  -6   6    5.72    0.35
   1  -6   6    5.84    0.40
   1  -6   6    5.99    0.61
   1  -6   6    6.26    0.47
  -1  -6  -6    5.61    0.50
  -1  -6  -6    6.21    0.26
  -1   6  -6    5.42    0.30
  -1  -6  -6    6.03    0.33
   1  -6   7   33.13    1.51
   1   6   7   31.16    1.44
   1  -6   7   30.89    1.80
   1  -6   7   33.45    1.40
  -1  -6  -7   34.28    1.24
  -1   6  -7   31.93    1.40
  -1   6  -7   23.84    1.56
  -1  -6  -7   32.74    1.44
   1  -6   8   12.76    0.84
   1   6   8   12.00    0.71
   1  -6   8   13.94    1.12
   1  -6   8   13.94    0.77
  -1  -6  -8   13.21    0.55
  -1  -6  -8   14.86    0.85
  -1   6  -8   12.96    0.78
  -1   6  -8   13.38    1.01
   1  -6   9    4.83    0.61
   1  -6   9    4.78    0.40
   1   6   9    5.45    0.50
   1  -6   9    5.36    0.54
  -1   6  -9    4.17    0.43
  -1  -6  -9    4.77    0.34
  -1   6  -9    3.95    0.57
  -1  -6  -9    6.02    0.53
   1   6  10    9.74    0.81
   1  -6  10   10.67    0.64
   1  -6  10   11.58    0.74
   1  -6  10   11.12    1.20
  -1   6 -10   10.72    0.82
  -1  -6 -10   11.56    0.81
  -1  -6 -10   12.56    0.67
  -1   6 -10   10.55    1.12
   1  -6  11   19.82    1.10
   1  -6  11   19.83    1.00
  -1  -6 -11   19.39    0.93
  -1  -6 -11   19.81    1.11
  -1   6 -11   18.70    1.11
   1   6  12    0.50    0.14
   1  -6  12    0.56    0.22
   1  -6  12    0.71    0.18
  -1  -6 -12    0.48    0.23
  -1   6 -12    0.74    0.25
   1   6  13    2.20    0.19
   1  -6  13    1.60    0.16
   1  -6  13    1.92    0.28
  -1   6 -13    2.46    0.33
  -1  -6 -13    2.29    0.29
   1   6  14    0.30    0.09
   1  -6  14    0.42    0.13
  -1  -6 -14    0.36    0.12
  -1   6 -14    0.62    0.17
   1   7 -14    5.68    0.43
   1  -7 -14    5.62    0.49
  -1  -7  14    4.91    0.29
  -1   7  14    5.56    0.32
  -1  -7  14    5.70    0.37
   1   7 -13    2.39    0.34
   1  -7 -13    2.78    0.38
   1  -7 -13    2.45    0.37
  -1  -7  13    2.32    0.31
  -1  -7  13    1.85    0.27
   1  -7 -12    3.08    0.42
   1   7 -12    3.72    0.39
   1  -7 -12    3.91    0.47
  -1  -7  12    2.81    0.38
  -1  -7  12    3.30    0.43
   1  -7 -11   24.66    1.37
   1  -7 -11   23.78    1.29
   1   7 -11   22.66    1.19
  -1  -7  11   23.95    1.15
  -1  -7  11   24.72    1.17
   1  -7 -10   29.29    1.47
   1   7 -10   26.42    1.58
   1   7 -10   27.44    1.36
   1  -7 -10   29.33    1.23
  -1  -7  10   26.59    1.22
  -1  -7  10   25.46    1.68
  -1  -7  10   27.63    1.34
  -1   7  10   25.80    1.26
   1  -7  -9   14.60    0.88
   1   7  -9   13.15    0.73
   1  -7  -9   14.06    0.71
  -1  -7   9   13.43    0.78
  -1  -7   9   12.76    0.71
  -1  -7   9   12.51    1.17
  -1   7   9   12.70    0.88
   1  -7  -8    0.36    0.12
   1   7  -8    0.25    0.16
   1  -7  -8    0.72    0.19
  -1  -7   8    0.33    0.16
  -1  -7   8    0.31    0.12
  -1  -7   8    0.50    0.26
  -1   7   8    0.60    0.19
  -1  -7   8    0.66    0.19
  -1  -7   8    0.19    0.31
   1  -7  -7    3.65    0.33
   1   7  -7    2.96    0.24
   1  -7  -7    3.49    0.21
  -1  -7   7    3.33    0.27
  -1  -7   7    3.38    0.51
  -1  -7   7    2.84    0.47
  -1  -7   7    3.15    0.27
  -1  -7   7    3.60    0.31
  -1   7   7    3.11    0.34
   1  -7  -6    2.05    0.16
   1   7  -6    0.85    0.14
   1  -7  -6    1.12    0.27
   1  -7  -6    1.67    0.18
  -1  -7   6    1.47    0.25
  -1  -7   6    1.33    0.18
  -1  -7   6    1.25    0.35
  -1  -7   6    1.15    0.35
  -1  -7   6    0.91    0.17
   1  -7  -5    0.91    0.10
   1  -7  -5    0.88    0.14
   1  -7  -5    1.00    0.08
   1  -7  -5    1.22    0.19
  -1  -7   5    1.35    0.17
  -1  -7   5    0.98    0.18
  -1  -7   5    1.04    0.33
  -1  -7   5    0.81    0.14
  -1  -7   5    0.97    0.28
  -1  -7   5    0.92    0.17
   1  -7  -4   18.55    0.59
   1  -7  -4   18.46    0.55
   1  -7  -4   18.34    0.51
   1  -7  -4   19.28    0.92
   1  -7  -4   18.76    0.57
  -1  -7   4   19.20    0.70
  -1  -7   4   18.17    0.59
  -1  -7   4   18.05    0.95
  -1  -7   4   18.57    1.15
  -1  -7   4   18.59    0.72
  -1  -7   4   19.13    0.64
   1  -7  -3   37.06    1.22
   1  -7  -3   36.81    1.18
   1  -7  -3   34.90    1.41
   1  -7  -3   35.72    1.10
  -1  -7   3   38.18    1.29
  -1  -7   3   37.48    1.37
  -1  -7   3   39.39    1.95
  -1  -7   3   38.17    1.66
  -1  -7   3   37.39    1.21
   1  -7  -2  126.89    5.53
   1  -7  -2  128.23    6.16
   1  -7  -2  130.25    5.56
   1  -7  -2  133.31    6.32
   1  -7  -2  131.89    5.71
  -1  -7   2  136.51    7.10
  -1  -7   2  130.11    6.30
  -1  -7   2  131.09    5.89
  -1  -7   2  143.02    6.24
   1  -7  -1  339.99   20.73
   1  -7  -1  365.58   23.68
   1  -7  -1  366.16   22.00
   1  -7  -1  360.24   23.04
  -1  -7   1  359.17   21.69
  -1  -7   1  343.42   21.88
  -1  -7   1  344.73   22.60
  -1  -7   1  346.60   21.29
   1  -7   0   73.78    2.67
   1  -7   0   70.63    3.12
   1  -7   0   74.38    2.76
   1  -7   0   63.83    2.91
  -1  -7   0   69.15    3.13
  -1  -7   0   70.72    2.97
  -1  -7   0   73.36    2.69
   1  -7   1  161.73    7.46
   1  -7   1  165.94    8.44
   1  -7   1  160.37    7.38
   1  -7   1  159.81    8.17
  -1  -7  -1  157.93    7.79
  -1  -7  -1  162.42    7.55
  -1  -7  -1  169.70    8.81
   1  -7   2   21.14    0.60
   1  -7   2   19.53    1.08
   1  -7   2   20.54    0.69
   1  -7   2   20.12    0.70
   1  -7   2   19.82    0.69
   1  -7   2   20.91    1.04
  -1  -7  -2   20.80    0.83
  -1  -7  -2   20.26    0.96
  -1  -7  -2   21.39    1.08
  -1  -7  -2   20.47    0.66
   1  -7   3    0.06    0.09
   1  -7   3    0.20    0.18
   1  -7   3   -0.03    0.19
   1  -7   3    0.28    0.10
   1  -7   3    0.08    0.09
  -1  -7  -3    0.65    0.15
  -1  -7  -3    0.11    0.08
  -1  -7  -3    0.34    0.12
  -1  -7  -3    0.27    0.05
  -1  -7  -3   -0.08    0.16
   1  -7   4    0.22    0.10
   1  -7   4    0.07    0.09
   1  -7   4    0.04    0.07
   1  -7   4    0.02    0.14
   1  -7   4   -0.00    0.16
  -1  -7  -4    0.09    0.13
  -1  -7  -4    0.01    0.04
  -1  -7  -4    0.02    0.07
  -1  -7  -4    0.14    0.09
   1  -7   5    7.23    0.69
   1  -7   5    6.58    0.43
   1  -7   5    7.92    0.48
   1   7   5    7.10    0.39
   1  -7   5    7.59    0.58
   1  -7   5    7.99    0.34
  -1  -7  -5    7.33    0.26
  -1  -7  -5    6.87    0.52
  -1  -7  -5    7.77    0.40
  -1   7  -5    6.99    0.37
   1   7   6   50.89    2.08
   1  -7   6   48.58    2.69
   1  -7   6   49.48    2.11
   1  -7   6   53.54    2.53
   1  -7   6   54.53    2.37
   1  -7   6   51.54    1.86
  -1  -7  -6   49.97    1.71
  -1   7  -6   47.51    1.95
  -1  -7  -6   52.19    2.17
   1  -7   7   31.21    1.57
   1  -7   7   28.62    1.85
   1   7   7   28.41    1.36
   1  -7   7   30.77    1.42
  -1  -7  -7   32.75    1.45
  -1   7  -7   28.04    1.28
  -1  -7  -7   32.08    1.21
  -1   7  -7   27.92    1.52
   1  -7   8    0.06    0.17
   1  -7   8    0.06    0.28
   1  -7   8    0.14    0.20
   1   7   8    0.50    0.16
  -1   7  -8    0.11    0.17
  -1  -7  -8    0.07    0.19
  -1   7  -8    0.18    0.21
   1  -7   9    1.64    0.29
   1  -7   9    1.21    0.51
   1  -7   9    1.63    0.31
   1   7   9    1.29    0.26
  -1  -7  -9    1.59    0.33
  -1  -7  -9    1.39    0.20
  -1   7  -9    1.43    0.32
  -1   7  -9    1.09    0.46
   1  -7  10    0.34    0.17
   1  -7  10   -0.02    0.17
  -1  -7 -10    0.13    0.18
  -1   7 -10    0.11    0.14
  -1  -7 -10    0.07    0.14
   1  -7  11    2.77    0.36
   1  -7  11    3.19    0.40
  -1  -7 -11    2.98    0.36
  -1  -7 -11    3.03    0.40
  -1   7 -11    3.27    0.33
   1  -7  12    0.60    0.17
   1   7  12    0.63    0.13
   1  -7  12    0.43    0.21
  -1   7 -12    0.72    0.19
  -1  -7 -12    0.63    0.24
   1  -7  13    0.10    0.12
   1   7  13    0.10    0.06
   1  -7  13    0.09    0.08
  -1   7 -13    0.25    0.14
  -1  -7 -13    0.27    0.15
  -1  -7 -14    0.62    0.13
   1  -8 -14    2.56    0.31
  -1  -8  14    2.91    0.19
  -1   8  14    2.73    0.19
   1  -8 -13    2.04    0.33
   1   8 -13    1.43    0.26
   1  -8 -13    2.13    0.31
  -1  -8  13    1.27    0.20
  -1  -8  13    2.11    0.21
   1   8 -12    6.62    0.51
   1  -8 -12    8.01    0.62
   1  -8 -12    6.85    0.54
  -1  -8  12    7.36    0.56
  -1  -8  12    7.05    0.45
   1  -8 -11    0.31    0.19
   1   8 -11    0.23    0.17
   1  -8 -11    0.27    0.22
  -1  -8  11    0.15    0.20
  -1  -8  11    0.15    0.15
   1  -8 -10    0.06    0.13
   1   8 -10    0.09    0.13
   1   8 -10    0.15    0.21
   1  -8 -10    0.03    0.15
  -1   8  10   -0.01    0.16
  -1  -8  10    0.14    0.15
   1   8  -9    2.44    0.28
   1  -8  -9    2.34    0.32
   1  -8  -9    2.49    0.32
  -1  -8   9    1.34    0.57
  -1   8   9    2.39    0.40
  -1  -8   9    1.79    0.29
  -1  -8   9    2.79    0.37
   1  -8  -8  123.62    5.83
   1  -8  -8  124.32    6.16
   1   8  -8  112.65    5.47
  -1  -8   8  120.19    5.49
  -1  -8   8  105.61    5.18
  -1  -8   8  105.30    6.18
  -1  -8   8  123.88    6.38
  -1  -8   8  119.02    6.47
  -1   8   8  116.84    6.23
   1  -8  -7   56.57    2.40
   1  -8  -7   55.80    2.21
  -1  -8   7   50.21    2.10
  -1  -8   7   51.16    2.88
  -1  -8   7   56.13    2.15
  -1  -8   7   62.49    2.75
  -1  -8   7   57.52    2.78
  -1   8   7   50.09    2.47
   1  -8  -6    9.04    0.42
   1  -8  -6    8.81    0.65
   1  -8  -6    8.24    0.28
   1  -8  -6    9.01    0.47
  -1  -8   6    8.22    0.43
  -1  -8   6   10.15    0.84
  -1  -8   6    9.28    0.50
  -1  -8   6    8.76    0.58
  -1  -8   6    9.09    0.79
   1  -8  -5    0.79    0.11
   1  -8  -5    1.13    0.15
   1  -8  -5    1.12    0.26
   1  -8  -5    0.75    0.14
  -1  -8   5    0.74    0.21
  -1  -8   5    1.14    0.34
  -1  -8   5    0.97    0.16
  -1  -8   5    0.83    0.15
  -1  -8   5    0.77    0.32
  -1  -8   5    0.73    0.20
   1  -8  -4   40.33    1.39
   1  -8  -4   39.58    1.34
   1  -8  -4   37.26    1.17
   1  -8  -4   39.06    1.79
  -1  -8   4   37.18    2.04
  -1  -8   4   40.74    1.56
  -1  -8   4   38.79    1.38
  -1  -8   4   38.66    1.55
  -1  -8   4   38.87    1.83
  -1  -8   4   37.46    1.32
   1  -8  -3   45.65    1.60
   1  -8  -3   43.98    2.00
   1  -8  -3   43.57    1.45
   1  -8  -3   45.48    1.57
  -1  -8   3   47.32    1.75
  -1  -8   3   44.15    2.35
  -1  -8   3   45.32    2.02
  -1  -8   3   44.21    1.52
  -1  -8   3   44.34    1.51
  -1  -8   3   45.59    1.80
   1  -8  -2   47.89    1.71
   1  -8  -2   47.10    1.68
   1  -8  -2   47.59    2.21
   1  -8  -2   46.14    1.51
  -1  -8   2   49.16    2.08
  -1  -8   2   47.35    1.85
  -1  -8   2   46.35    1.54
  -1  -8   2   46.58    1.60
  -1  -8   2   48.07    2.40
  -1  -8   2   49.96    1.70
   1  -8  -1  104.47    5.13
   1  -8  -1  109.55    4.63
   1  -8  -1  111.66    4.72
   1  -8  -1  103.70    5.06
  -1  -8   1  107.15    4.67
  -1  -8   1  105.73    4.30
  -1  -8   1  109.12    4.57
  -1  -8   1  112.42    5.65
  -1  -8   1  112.62    5.19
   1  -8   0    4.36    0.19
   1  -8   0    5.05    0.50
   1  -8   0    4.62    0.26
   1  -8   0    4.53    0.27
   1  -8   0    4.21    0.49
   1  -8   0    3.87    0.19
  -1  -8   0    3.80    0.22
  -1  -8   0    5.18    0.36
  -1  -8   0    4.09    0.17
  -1  -8   0    4.81    0.29
  -1  -8   0    4.48    0.51
   1  -8   1   47.42    1.75
   1  -8   1   49.48    2.36
   1  -8   1   50.50    1.87
   1  -8   1   52.38    1.76
   1  -8   1   49.12    2.33
   1  -8   1   47.65    1.66
  -1  -8  -1   47.99    1.76
  -1  -8  -1   50.19    1.72
  -1  -8  -1   45.58    1.84
  -1  -8  -1   47.79    1.53
  -1  -8  -1   49.15    2.22
   1  -8   2   74.49    3.68
   1  -8   2   76.86    3.09
   1  -8   2   74.38    2.98
   1  -8   2   78.62    2.91
   1  -8   2   75.88    3.69
   1  -8   2   75.37    2.96
  -1  -8  -2   74.52    2.69
  -1  -8  -2   77.11    3.23
  -1  -8  -2   77.70    2.90
  -1  -8  -2   77.71    2.91
  -1  -8  -2   76.86    3.55
   1  -8   3   55.17    2.87
   1  -8   3   60.97    2.27
   1  -8   3   59.92    2.31
   1  -8   3   56.71    2.28
   1  -8   3   60.21    2.93
  -1  -8  -3   60.75    2.44
  -1  -8  -3   60.04    2.14
  -1  -8  -3   59.17    2.54
  -1  -8  -3   57.70    2.16
  -1  -8  -3   60.76    2.19
  -1  -8  -3   56.02    1.91
   1  -8   4    4.71    0.46
   1  -8   4    4.13    0.48
   1  -8   4    3.76    0.28
   1  -8   4    3.84    0.35
   1  -8   4    4.10    0.26
  -1  -8  -4    3.33    0.17
  -1  -8  -4    3.89    0.31
  -1  -8  -4    3.21    0.19
  -1  -8  -4    3.63    0.24
  -1  -8  -4    4.36    0.43
   1  -8   5    0.20    0.16
   1  -8   5    0.21    0.27
   1  -8   5    0.34    0.11
   1   8   5    0.17    0.15
   1  -8   5    0.27    0.15
   1  -8   5    0.29    0.22
  -1  -8  -5    0.23    0.08
  -1  -8  -5    0.31    0.13
   1  -8   6    1.26    0.15
   1  -8   6    1.35    0.42
   1   8   6    1.34    0.26
   1  -8   6    1.32    0.24
   1  -8   6    1.11    0.31
   1  -8   6    1.17    0.26
  -1   8  -6    0.98    0.20
  -1  -8  -6    1.11    0.23
  -1  -8  -6    1.08    0.15
   1  -8   7   32.06    1.91
   1  -8   7   35.60    1.52
   1  -8   7   35.88    1.63
   1   8   7   32.18    1.54
  -1  -8  -7   35.65    1.53
  -1   8  -7   32.23    2.05
  -1   8  -7   33.23    1.50
  -1  -8  -7   37.32    1.44
   1  -8   8    0.25    0.24
   1   8   8    0.11    0.18
   1  -8   8    0.51    0.34
   1  -8   8    0.24    0.21
   1  -8   8    0.32    0.10
  -1   8  -8    0.35    0.32
  -1  -8  -8    0.36    0.22
  -1   8  -8    0.37    0.18
  -1  -8  -8    0.10    0.14
   1   8   9    5.71    0.56
   1  -8   9    6.28    0.50
   1  -8   9    6.31    0.54
   1  -8   9    5.17    0.90
  -1   8  -9    4.61    0.87
  -1  -8  -9    5.86    0.58
  -1   8  -9    5.77    0.52
  -1  -8  -9    6.05    0.36
   1  -8  10   18.53    1.02
   1  -8  10   19.72    0.92
  -1  -8 -10   17.98    0.89
  -1  -8 -10   18.02    1.12
  -1   8 -10   17.80    1.01
   1  -8  11   22.54    0.98
   1  -8  11   23.11    1.03
  -1  -8 -11   23.76    1.11
  -1   8 -11   20.79    1.15
  -1  -8 -11   21.51    1.22
   1  -8  12    0.98    0.19
   1  -8  12    1.46    0.17
   1   8  12    1.03    0.13
  -1  -8 -12    1.24    0.25
  -1   8 -12    1.22    0.24
   1   8  13    7.37    0.25
   1  -8  13    8.52    0.39
   1  -8  13    9.25    0.42
  -1   8 -13    7.24    0.49
  -1  -8 -13    8.93    0.53
   1  -9 -13   -0.14    0.07
   1  -9 -13    0.13    0.09
  -1  -9  13    0.08    0.08
   1  -9 -12    6.42    0.51
   1  -9 -12    6.23    0.53
  -1  -9  12    6.45    0.48
  -1  -9  12    5.47    0.33
   1  -9 -11    0.18    0.19
   1  -9 -11    0.18    0.17
  -1  -9  11    0.35    0.13
  -1  -9  11    0.40    0.20
   1  -9 -10    1.11    0.25
   1  -9 -10    0.82    0.22
  -1  -9  10    0.73    0.24
  -1  -9  10    0.67    0.14
   1   9  -9    2.11    0.46
   1  -9  -9    2.34    0.37
   1  -9  -9    2.03    0.29
  -1  -9   9    2.43    0.45
  -1   9   9    2.16    0.40
  -1  -9   9    2.32    0.27
   1  -9  -8    1.60    0.22
   1  -9  -8    1.68    0.23
  -1  -9   8    1.73    0.24
  -1  -9   8    1.24    0.48
  -1  -9   8    1.27    0.39
  -1   9   8    1.88    0.30
  -1  -9   8    0.90    0.52
  -1  -9   8    1.61    0.23
   1  -9  -7    0.06    0.12
   1  -9  -7    0.06    0.13
  -1  -9   7    0.09    0.13
  -1  -9   7    0.10    0.24
  -1  -9   7    0.10    0.17
  -1   9   7    0.21    0.18
  -1  -9   7    0.38    0.23
   1  -9  -6   17.37    0.71
   1  -9  -6   15.22    0.92
   1  -9  -6   16.10    0.50
   1  -9  -6   17.10    0.68
  -1  -9   6   16.12    1.21
  -1  -9   6   17.18    0.84
  -1  -9   6   16.32    1.17
  -1  -9   6   18.11    0.80
  -1  -9   6   15.13    0.66
   1  -9  -5   59.91    2.84
   1  -9  -5   59.51    2.17
   1  -9  -5   59.52    2.34
  -1  -9   5   56.63    2.22
  -1  -9   5   61.91    2.48
  -1  -9   5   58.78    2.72
  -1  -9   5   61.70    2.50
  -1  -9   5   63.63    2.69
  -1  -9   5   61.17    3.08
   1  -9  -4   27.92    0.90
   1  -9  -4   26.64    1.21
   1  -9  -4   28.03    0.87
   1  -9  -4   26.32    0.98
  -1  -9   4   28.51    1.79
  -1  -9   4   28.59    1.14
  -1  -9   4   27.46    0.95
  -1  -9   4   29.44    1.47
  -1  -9   4   29.02    1.24
  -1  -9   4   28.00    1.08
   1  -9  -3    8.53    0.34
   1  -9  -3    8.20    0.62
   1  -9  -3    8.30    0.39
   1  -9  -3    8.20    0.40
  -1  -9   3    8.15    0.40
  -1  -9   3    8.09    0.62
  -1  -9   3    8.26    0.34
  -1  -9   3    7.93    0.88
  -1  -9   3    7.99    0.46
  -1  -9   3    8.27    0.52
   1  -9  -2    0.79    0.15
   1  -9  -2    0.78    0.13
   1  -9  -2    0.74    0.16
   1  -9  -2    1.07    0.27
  -1  -9   2    0.76    0.12
  -1  -9   2    0.77    0.23
  -1  -9   2    0.83    0.20
  -1  -9   2    0.58    0.35
  -1  -9   2    0.84    0.11
  -1  -9   2    0.60    0.15
   1  -9  -1    6.43    0.29
   1  -9  -1    6.55    0.49
   1  -9  -1    6.90    0.33
   1  -9  -1    6.00    0.50
   1  -9  -1    6.85    0.33
  -1  -9   1    6.66    0.36
  -1  -9   1    6.80    0.28
  -1  -9   1    6.49    0.56
  -1  -9   1    6.59    0.26
  -1  -9   1    7.03    0.51
   1  -9   0   15.76    1.01
   1  -9   0   16.99    0.74
   1  -9   0   17.16    0.57
   1  -9   0   17.93    0.93
   1  -9   0   18.26    0.63
  -1  -9   0   16.63    0.60
  -1  -9   0   15.93    0.90
  -1  -9   0   16.15    0.82
  -1  -9   0   16.58    0.66
  -1  -9   0   16.56    0.54
   1  -9   1   68.43    3.49
   1  -9   1   63.65    2.40
   1  -9   1   65.68    2.67
   1  -9   1   66.15    2.67
   1  -9   1   69.19    2.57
   1  -9   1   62.89    3.24
  -1  -9  -1   66.41    3.22
  -1  -9  -1   66.90    2.84
  -1  -9  -1   68.83    2.74
  -1  -9  -1   69.58    2.61
  -1  -9  -1   65.27    2.31
   1  -9   2    7.22    0.69
   1  -9   2    6.71    0.39
   1  -9   2    6.76    0.34
   1  -9   2    7.00    0.70
   1  -9   2    6.52    0.41
  -1  -9  -2    6.04    0.22
  -1  -9  -2    7.91    0.60
  -1  -9  -2    6.96    0.29
  -1  -9  -2    6.67    0.43
  -1  -9  -2    6.82    0.36
   1  -9   3    0.77    0.28
   1  -9   3    0.59    0.15
   1  -9   3    0.72    0.16
   1  -9   3    0.35    0.30
   1  -9   3    0.43    0.16
  -1  -9  -3    0.36    0.17
  -1  -9  -3    0.47    0.08
  -1  -9  -3    0.41    0.18
  -1  -9  -3    0.29    0.11
   1  -9   4    3.15    0.48
   1  -9   4    2.66    0.53
   1  -9   4    3.12    0.30
   1  -9   4    2.77    0.30
   1  -9   4    2.78    0.26
  -1  -9  -4    2.28    0.28
  -1  -9  -4    2.30    0.17
  -1  -9  -4    2.46    0.22
  -1  -9  -4    2.51    0.15
   1   9   5   21.62    1.09
   1  -9   5   25.82    1.04
   1  -9   5   24.92    1.07
   1  -9   5   21.91    1.66
   1  -9   5   23.43    1.38
   1  -9   5   23.77    1.16
  -1  -9  -5   24.74    0.99
  -1  -9  -5   24.03    0.80
   1   9   6    5.83    0.50
   1  -9   6    5.75    0.49
   1  -9   6    6.17    0.72
   1  -9   6    5.92    0.37
   1  -9   6    5.32    0.53
   1  -9   6    5.79    0.44
  -1  -9  -6    5.78    0.32
  -1  -9  -6    6.61    0.46
   1   9   7   26.52    1.40
   1  -9   7   31.87    1.50
   1  -9   7   26.70    2.20
   1  -9   7   29.66    1.08
   1  -9   7   30.12    1.55
  -1   9  -7   27.23    1.90
  -1  -9  -7   31.05    1.48
  -1  -9  -7   31.45    1.25
   1   9   8   18.39    0.95
   1  -9   8   20.71    0.81
   1  -9   8   20.81    1.79
   1  -9   8   21.41    1.33
   1  -9   8   20.81    1.17
  -1   9  -8   20.35    1.42
  -1  -9  -8   21.02    1.04
  -1  -9  -8   21.90    0.93
   1  -9   9    0.78    0.25
   1  -9   9    0.70    0.27
  -1  -9  -9    0.73    0.18
  -1   9  -9    0.71    0.22
  -1  -9  -9    0.89    0.21
   1  -9  10    1.23    0.24
   1  -9  10    0.99    0.25
  -1  -9 -10    0.74    0.21
  -1  -9 -10    1.01    0.27
  -1   9 -10    0.73    0.22
   1  -9  11    1.37    0.24
   1  -9  11    1.56    0.23
  -1  -9 -11    1.33    0.23
  -1  -9 -11    1.18    0.21
   1  -9  12    0.10    0.08
   1  -9  12    0.10    0.09
   1   9  12    0.00    0.06
  -1  -9 -12    0.04    0.12
  -1 -10  13    1.04    0.13
   1 -10 -12    0.03    0.10
   1 -10 -12    0.02    0.11
  -1 -10  12    0.09    0.11
   1 -10 -11    0.71    0.19
   1 -10 -11    0.59    0.18
  -1 -10  11    1.00    0.20
  -1 -10  11    0.59    0.14
   1 -10 -10    1.45    0.23
   1 -10 -10    1.52    0.23
  -1 -10  10    1.25    0.18
  -1 -10  10    1.78    0.33
  -1 -10  10    1.43    0.13
   1 -10  -9    2.88    0.28
   1 -10  -9    2.25    0.30
  -1 -10   9    2.20    0.23
  -1 -10   9    2.35    0.41
   1 -10  -8    8.88    0.50
   1 -10  -8    9.18    0.53
  -1 -10   8    8.93    0.70
  -1 -10   8    8.69    0.38
  -1 -10   8    7.97    0.44
  -1  10   8    8.46    0.73
   1 -10  -7    0.28    0.15
   1 -10  -7    0.29    0.15
  -1 -10   7    0.32    0.18
  -1 -10   7    0.18    0.34
  -1  10   7    0.31    0.24
  -1 -10   7    0.86    0.18
  -1 -10   7    0.55    0.13
   1 -10  -6    4.23    0.25
   1 -10  -6    4.62    0.46
   1 -10  -6    4.37    0.21
  -1 -10   6    4.81    0.46
  -1 -10   6    4.54    0.42
  -1 -10   6    4.59    0.62
  -1 -10   6    3.80    0.69
  -1 -10   6    3.97    0.23
   1 -10  -5   62.76    2.54
   1 -10  -5   60.32    2.72
   1 -10  -5   63.42    2.39
  -1 -10   5   58.77    3.13
  -1 -10   5   60.37    2.68
  -1 -10   5   54.34    2.84
  -1 -10   5   62.25    2.81
  -1 -10   5   56.31    2.22
   1 -10  -4    8.08    0.35
   1 -10  -4    8.32    0.67
   1 -10  -4    7.65    0.31
   1 -10  -4    7.97    0.43
  -1 -10   4    7.53    0.35
  -1 -10   4    7.34    0.46
  -1 -10   4    7.80    0.44
  -1 -10   4    6.73    0.67
  -1 -10   4    7.78    0.49
  -1 -10   4    7.93    0.75
   1 -10  -3   74.57    3.07
   1 -10  -3   72.44    3.53
   1 -10  -3   72.20    2.94
   1 -10  -3   70.82    2.75
  -1 -10   3   72.02    2.87
  -1 -10   3   73.10    3.79
  -1 -10   3   73.02    3.12
  -1 -10   3   74.61    3.59
  -1 -10   3   71.47    2.78
   1 -10  -2    3.56    0.34
   1 -10  -2    3.93    0.52
   1 -10  -2    3.65    0.27
   1 -10  -2    4.09    0.31
  -1 -10   2    3.84    0.34
  -1 -10   2    4.47    0.50
  -1 -10   2    3.89    0.23
  -1 -10   2    3.71    0.43
  -1 -10   2    3.87    0.26
   1 -10  -1   14.10    0.59
   1 -10  -1   12.97    0.52
   1 -10  -1   12.36    0.53
   1 -10  -1   13.19    0.80
  -1 -10   1   13.00    0.71
  -1 -10   1   13.34    0.49
  -1 -10   1   11.17    0.95
  -1 -10   1   13.39    0.83
  -1 -10   1   13.07    0.46
   1 -10   0   13.85    0.43
   1 -10   0   13.01    0.61
   1 -10   0   13.44    0.80
   1 -10   0   13.36    0.63
   1 -10   0   12.53    0.98
   1 -10   0   14.44    0.68
  -1 -10   0   13.74    0.76
  -1 -10   0   14.14    0.55
  -1 -10   0   12.36    1.01
  -1 -10   0   13.82    0.69
  -1 -10   0   13.76    0.46
   1 -10   1   17.88    1.04
   1 -10   1   18.26    0.78
   1 -10   1   17.92    0.73
   1 -10   1   17.67    0.65
   1 -10   1   16.89    1.22
  -1 -10  -1   17.74    0.55
  -1 -10  -1   17.95    1.02
  -1 -10  -1   18.21    0.65
  -1 -10  -1   18.17    0.86
  -1 -10  -1   18.75    0.79
   1 -10   2   25.98    1.02
   1 -10   2   25.19    0.96
   1 -10   2   25.53    1.60
   1 -10   2   25.30    1.53
   1 -10   2   26.06    1.12
  -1 -10  -2   28.24    1.22
  -1 -10  -2   26.02    1.02
  -1 -10  -2   26.96    1.41
  -1 -10  -2   26.63    0.94
  -1 -10  -2   25.56    0.88
  -1 -10  -2   24.88    0.78
   1 -10   3    2.20    0.47
   1 -10   3    3.28    0.31
   1 -10   3    2.49    0.25
   1 -10   3    2.40    0.52
   1 -10   3    2.23    0.28
  -1 -10  -3    2.26    0.29
  -1 -10  -3    2.21    0.14
  -1 -10  -3    2.27    0.21
   1 -10   4    9.52    0.62
   1 -10   4    9.33    0.48
   1 -10   4    9.24    0.70
   1 -10   4   10.43    0.86
   1 -10   4    7.97    0.52
  -1 -10  -4    9.13    0.38
  -1 -10  -4    9.24    0.53
  -1 -10  -4    9.24    0.35
   1 -10   5    0.87    0.19
   1 -10   5    0.49    0.26
   1 -10   5    0.71    0.25
   1 -10   5    0.59    0.35
   1 -10   5    0.69    0.19
   1  10   5    0.51    0.22
  -1 -10  -5    0.72    0.12
   1  10   6    9.97    0.69
   1 -10   6    9.36    0.68
   1 -10   6   10.19    0.51
   1 -10   6   10.08    0.51
   1 -10   6   10.42    0.75
   1 -10   6    9.73    0.94
  -1 -10  -6   10.41    0.46
  -1 -10  -6   10.34    0.56
  -1  10  -6    9.17    0.98
   1 -10   7    0.36    0.19
   1 -10   7   -0.02    0.36
   1 -10   7    0.23    0.13
   1 -10   7    0.18    0.10
   1 -10   7    0.26    0.22
  -1 -10  -7    0.25    0.12
  -1 -10  -7    0.37    0.17
  -1  10  -7    0.31    0.30
   1 -10   8    0.74    0.18
   1 -10   8    0.71    0.14
   1 -10   8    0.74    0.28
  -1 -10  -8    0.58    0.14
  -1 -10  -8    0.45    0.21
   1 -10   9    2.18    0.31
   1 -10   9    2.48    0.37
  -1 -10  -9    1.99    0.23
  -1 -10  -9    1.93    0.30
   1 -10  10    4.18    0.40
   1 -10  10    4.22    0.36
  -1 -10 -10    4.75    0.30
  -1 -10 -10    4.60    0.33
   1 -10  11    1.06    0.19
   1 -10  11    1.32    0.21
  -1 -10 -11    1.15    0.23
   1 -10  12    3.64    0.21
  -1 -10 -12    3.63    0.31
   1 -11 -12    1.84    0.22
  -1 -11  12    2.53    0.21
   1 -11 -11    0.03    0.09
   1 -11 -11    0.05    0.09
  -1 -11  11    0.11    0.13
   1 -11 -10    0.09    0.11
   1 -11 -10    0.20    0.13
  -1 -11  10    0.36    0.14
  -1 -11  10    0.23    0.08
   1 -11  -9    7.94    0.39
   1 -11  -9    8.00    0.46
  -1 -11   9    8.52    0.65
  -1 -11   9    7.62    0.37
   1 -11  -8    0.64    0.16
  -1 -11   8    0.64    0.13
  -1 -11   8    0.54    0.24
  -1 -11   8    0.38    0.13
   1 -11  -7    4.80    0.33
  -1 -11   7    5.37    0.40
  -1 -11   7    5.45    0.31
  -1 -11   7    4.47    0.29
   1 -11  -6    3.10    0.27
   1 -11  -6    3.06    0.26
   1 -11  -6    3.24    0.19
  -1 -11   6    3.22    0.36
  -1 -11   6    3.07    0.67
  -1 -11   6    3.90    0.37
  -1 -11   6    3.08    0.21
   1 -11  -5   12.82    0.59
   1 -11  -5   13.00    0.52
   1 -11  -5   12.63    0.89
  -1 -11   5   12.44    1.16
  -1 -11   5   12.87    0.79
  -1 -11   5   12.16    0.50
  -1 -11   5   12.77    0.68
   1 -11  -4    1.33    0.21
   1 -11  -4    1.15    0.13
   1 -11  -4    1.19    0.28
   1 -11  -4    1.40    0.19
  -1 -11   4    1.32    0.21
  -1 -11   4    1.35    0.16
  -1 -11   4    1.94    0.26
  -1 -11   4    1.61    0.21
  -1 -11   4    1.02    0.39
   1 -11  -3   16.77    0.75
   1 -11  -3   16.34    0.63
   1 -11  -3   17.48    0.73
   1 -11  -3   17.60    1.13
  -1 -11   3   16.79    0.82
  -1 -11   3   16.09    1.18
  -1 -11   3   16.75    0.64
  -1 -11   3   16.91    0.83
   1 -11  -2   18.05    1.15
   1 -11  -2   18.65    0.75
   1 -11  -2   17.33    0.82
   1 -11  -2   18.00    0.74
  -1 -11   2   18.90    0.95
  -1 -11   2   17.31    0.61
  -1 -11   2   17.31    1.32
  -1 -11   2   17.46    0.80
   1 -11  -1    2.65    0.27
   1 -11  -1    2.71    0.31
   1 -11  -1    2.58    0.26
   1 -11  -1    2.87    0.48
  -1 -11   1    2.86    0.36
  -1 -11   1    2.34    0.54
  -1 -11   1    2.64    0.25
  -1 -11   1    2.42    0.17
  -1 -11   1    2.56    0.37
   1 -11   0   50.91    2.03
   1 -11   0   51.30    2.13
   1 -11   0   50.15    1.96
   1 -11   0   50.46    2.76
  -1 -11   0   52.43    1.91
  -1 -11   0   50.68    2.28
  -1 -11   0   50.50    1.79
  -1 -11   0   54.48    2.91
  -1 -11   0   51.45    2.21
   1 -11   1    2.25    0.34
   1 -11   1    2.56    0.41
   1 -11   1    2.38    0.28
   1 -11   1    2.62    0.30
  -1 -11  -1    2.35    0.24
  -1 -11  -1    2.32    0.16
  -1 -11  -1    2.08    0.20
  -1 -11  -1    1.81    0.31
  -1 -11  -1    2.04    0.47
  -1 -11  -1    2.53    0.24
   1 -11   2   46.42    2.76
   1 -11   2   50.09    2.21
   1 -11   2   48.96    2.14
   1 -11   2   48.46    1.87
   1 -11   2   47.73    2.08
  -1 -11  -2   47.61    1.64
  -1 -11  -2   48.91    2.01
  -1 -11  -2   49.57    2.16
  -1 -11  -2   46.94    1.72
   1 -11   3    9.13    0.59
   1 -11   3    9.21    0.49
   1 -11   3    9.47    0.63
   1 -11   3    8.76    0.83
   1 -11   3    8.80    0.50
  -1 -11  -3    8.74    0.47
  -1 -11  -3    8.57    0.33
   1 -11   4   68.00    3.17
   1 -11   4   70.76    3.07
   1 -11   4   74.07    3.29
   1 -11   4   67.11    2.84
   1 -11   4   69.11    4.14
  -1 -11  -4   66.01    2.59
  -1 -11  -4   69.80    2.60
   1 -11   5   14.24    0.67
   1 -11   5   13.81    0.79
   1 -11   5   12.36    1.29
   1 -11   5   14.01    0.71
   1 -11   5   13.43    0.79
  -1 -11  -5   15.13    0.52
   1 -11   6   32.82    2.54
   1 -11   6   37.62    1.56
   1 -11   6   40.70    1.55
   1 -11   6   37.50    1.77
   1 -11   6   34.46    1.62
  -1 -11  -6   38.18    1.34
  -1  11  -6   35.82    2.25
   1 -11   7    0.84    0.21
   1 -11   7    0.67    0.17
   1 -11   7    0.89    0.13
   1 -11   7    0.71    0.22
  -1 -11  -7    0.78    0.12
   1 -11   8    6.67    0.57
   1 -11   8    6.69    0.34
   1 -11   8    6.25    0.48
  -1 -11  -8    6.88    0.33
  -1 -11  -8    6.43    0.43
   1 -11   9    3.44    0.26
   1 -11   9    3.28    0.40
  -1 -11  -9    3.62    0.31
  -1 -11  -9    3.20    0.24
   1 -11  10    1.46    0.22
   1 -11  10    2.84    0.31
  -1 -11 -10    1.94    0.20
   1 -11  11    0.11    0.09
   1 -11  11   -0.00    0.06
  -1 -12  11    0.51    0.13
   1 -12 -10    0.63    0.15
  -1 -12  10    1.11    0.11
  -1 -12  10    0.94    0.22
   1 -12  -9    2.61    0.20
  -1 -12   9    3.08    0.22
  -1 -12   9    2.98    0.34
   1 -12  -8    0.69    0.15
  -1 -12   8    0.82    0.22
  -1 -12   8    0.82    0.17
  -1 -12   8    0.64    0.14
   1 -12  -7   11.70    0.54
  -1 -12   7   11.36    0.69
  -1 -12   7   11.12    0.56
   1 -12  -6    4.28    0.21
   1 -12  -6    4.75    0.30
  -1 -12   6    4.73    0.40
  -1 -12   6    5.04    0.39
   1 -12  -5   26.82    1.53
   1 -12  -5   29.84    1.14
   1 -12  -5   29.94    1.09
  -1 -12   5   28.19    2.02
  -1 -12   5   28.84    1.22
  -1 -12   5   29.65    1.33
   1 -12  -4    4.54    0.33
   1 -12  -4    4.80    0.33
   1 -12  -4    5.92    0.60
  -1 -12   4    4.58    0.45
  -1 -12   4    5.57    0.69
   1 -12  -3    0.95    0.16
   1 -12  -3    0.98    0.36
   1 -12  -3    1.24    0.17
   1 -12  -3    1.12    0.18
  -1 -12   3    1.24    0.27
  -1 -12   3    1.53    0.48
   1 -12  -2    6.12    0.36
   1 -12  -2    6.03    0.38
   1 -12  -2    8.12    0.67
   1 -12  -2    5.78    0.35
  -1 -12   2    6.33    0.39
  -1 -12   2    6.58    0.83
  -1 -12   2    5.75    0.54
   1 -12  -1   18.02    0.77
   1 -12  -1   17.63    0.67
   1 -12  -1   17.82    1.05
   1 -12  -1   19.29    0.74
  -1 -12   1   16.97    1.10
  -1 -12   1   18.16    0.86
  -1 -12   1   18.07    0.76
   1 -12   0    1.73    0.19
   1 -12   0    1.29    0.43
   1 -12   0    1.41    0.22
   1 -12   0    1.70    0.27
  -1 -12   0    1.27    0.44
  -1 -12   0    1.48    0.22
  -1 -12   0    1.18    0.18
  -1 -12   0    1.43    0.26
   1 -12   1   13.07    0.67
   1 -12   1   13.42    1.15
   1 -12   1   13.82    0.78
   1 -12   1   13.28    0.72
  -1 -12  -1   14.53    0.77
  -1 -12  -1   13.39    0.57
   1 -12   2   55.35    2.46
   1 -12   2   56.97    3.27
   1 -12   2   56.58    2.50
   1 -12   2   54.79    2.37
  -1 -12  -2   57.72    2.41
  -1 -12  -2   53.95    2.05
   1 -12   3   12.35    0.61
   1 -12   3   12.42    0.76
   1 -12   3   12.64    0.72
   1 -12   3   12.15    0.71
   1 -12   3   14.13    1.35
  -1 -12  -3   12.36    0.57
   1 -12   4   11.30    0.56
   1 -12   4   11.65    1.25
   1 -12   4   10.49    0.51
   1 -12   4   11.55    0.61
   1 -12   4   10.65    0.64
  -1 -12  -4    9.67    0.41
   1 -12   5   24.08    0.99
   1 -12   5   22.79    1.05
   1 -12   5   24.82    0.98
   1 -12   5   25.18    1.16
   1 -12   6    0.21    0.13
   1 -12   6    0.15    0.12
   1 -12   6    0.24    0.10
   1 -12   6    0.19    0.14
   1 -12   7    6.20    0.35
   1 -12   7    5.84    0.51
   1 -12   7    6.19    0.27
   1 -12   7    5.40    0.41
   1 -12   8    9.15    0.57
   1 -12   8    7.03    0.43
   1 -12   8    7.77    0.29
   1 -12   9    0.02    0.08
   1 -12   9    0.04    0.09
   1 -12  10    7.83    0.48
  -1 -13  10    0.50    0.12
   1 -13  -9    5.05    0.29
  -1 -13   9    5.52    0.28
  -1 -13   9    6.01    0.39
   1 -13  -8    0.34    0.10
  -1 -13   8    0.36    0.09
  -1 -13   8    0.24    0.09
  -1 -13   8    0.25    0.15
   1 -13  -7    1.49    0.17
  -1 -13   7    1.87    0.18
  -1 -13   7    1.32    0.24
  -1 -13   7    1.94    0.20
   1 -13  -6    0.14    0.09
  -1 -13   6    0.09    0.10
  -1 -13   6    0.04    0.10
  -1 -13   6    0.10    0.11
   1 -13  -5    8.29    0.38
   1 -13  -5    8.09    0.36
  -1 -13   5    8.21    0.46
  -1 -13   5    8.60    0.44
   1 -13  -4    0.05    0.07
   1 -13  -4    0.05    0.10
  -1 -13   4    0.15    0.11
  -1 -13   4    0.07    0.13
   1 -13  -3    0.43    0.15
   1 -13  -3    0.50    0.13
   1 -13  -3    0.38    0.10
  -1 -13   3    0.64    0.16
  -1 -13   3    0.25    0.19
   1 -13  -2   22.38    0.86
   1 -13  -2   22.84    0.93
   1 -13  -2   22.70    0.90
  -1 -13   2   23.56    1.20
  -1 -13   2   22.96    1.06
   1 -13  -1    1.39    0.19
   1 -13  -1    1.60    0.21
   1 -13  -1    1.40    0.21
  -1 -13   1    1.70    0.19
  -1 -13   1    1.73    0.25
   1 -13   0    2.05    0.23
   1 -13   0    2.29    0.27
   1 -13   0    2.94    0.27
  -1 -13   0    2.56    0.33
  -1 -13   0    2.61    0.22
   1 -13   1   25.35    1.17
   1 -13   1   25.87    1.17
   1 -13   1   24.55    0.99
  -1 -13  -1   24.89    0.95
  -1 -13  -1   25.71    1.17
   1 -13   2    5.09    0.35
   1 -13   2    4.99    0.40
   1 -13   2    4.46    0.33
  -1 -13  -2    4.93    0.24
  -1 -13  -2    4.67    0.37
   1 -13   3    8.71    0.48
   1 -13   3    8.66    0.50
   1 -13   3    8.01    0.53
  -1 -13  -3    8.60    0.42
   1 -13   4    3.84    0.31
   1 -13   4    3.78    0.25
   1 -13   4    4.17    0.30
   1 -13   4    3.66    0.34
  -1 -13  -4    3.26    0.20
   1 -13   5    0.09    0.11
   1 -13   5    0.05    0.12
   1 -13   5    0.07    0.11
   1 -13   5    0.10    0.09
   1 -13   6    6.78    0.35
   1 -13   6    8.05    0.43
   1 -13   6    7.48    0.35
   1 -13   6    7.55    0.49
   1 -13   7    3.15    0.26
   1 -13   7    3.27    0.23
   1 -13   7    3.29    0.27
   1 -13   8    0.62    0.14
   1 -13   8    0.76    0.20
   1 -13   8    1.01    0.11
   1 -13   9    4.75    0.33
  -1 -14   8    0.78    0.14
  -1 -14   8    0.99    0.10
   1 -14  -7    0.01    0.06
  -1 -14   7    0.10    0.07
  -1 -14   7    0.08    0.07
   1 -14  -6    0.26    0.07
  -1 -14   6    0.17    0.11
  -1 -14   6    0.20    0.12
   1 -14  -5    7.38    0.29
   1 -14  -5    8.42    0.32
  -1 -14   5    7.51    0.46
  -1 -14   5    5.87    0.45
   1 -14  -4    0.28    0.08
   1 -14  -4    0.23    0.09
  -1 -14   4    0.37    0.15
  -1 -14   4    0.41    0.16
   1 -14  -3    8.06    0.45
   1 -14  -3    8.66    0.37
  -1 -14   3    8.44    0.46
  -1 -14   3    8.68    0.55
   1 -14  -2    0.12    0.09
   1 -14  -2    0.17    0.13
   1 -14  -2    0.10    0.09
  -1 -14   2    0.22    0.13
  -1 -14   2    0.26    0.14
   1 -14  -1    0.06    0.13
   1 -14  -1    0.10    0.08
   1 -14  -1    0.17    0.11
  -1 -14   1   -0.01    0.15
  -1 -14   1    0.23    0.12
   1 -14   0    2.15    0.28
   1 -14   0    1.93    0.18
   1 -14   0    1.84    0.23
  -1 -14   0    1.83    0.21
  -1 -14   0    1.91    0.28
   1 -14   1    0.95    0.21
   1 -14   1    1.09    0.16
   1 -14   1    0.94    0.14
  -1 -14  -1    0.84    0.13
  -1 -14  -1    0.96    0.20
   1 -14   2    0.44    0.15
   1 -14   2    0.39    0.15
   1 -14   2    0.39    0.11
  -1 -14  -2    0.34    0.11
   1 -14   3   13.16    0.62
   1 -14   3   13.86    0.65
   1 -14   3   12.31    0.52
  -1 -14  -3   13.52    0.54
   1 -14   4    2.08    0.19
   1 -14   4    1.92    0.22
   1 -14   4    1.71    0.24
   1 -14   5    2.22    0.21
   1 -14   5    1.59    0.18
   1 -14   5    2.49    0.18
   1 -14   6    1.25    0.20
   1 -14   6    2.11    0.14
   1 -14   6    2.20    0.15
   1 -14   6    1.14    0.17
   1 -14   7    0.13    0.10
   1 -14   7    0.16    0.07
  -1 -15   7    4.47    0.20
  -1 -15   6    0.61    0.11
  -1 -15   6    0.48    0.12
  -1 -15   5    7.87    0.37
  -1 -15   5    6.86    0.36
   1 -15  -4    0.14    0.07
  -1 -15   4    0.02    0.10
  -1 -15   4    0.05    0.11
   1 -15  -3    2.42    0.21
  -1 -15   3    3.23    0.28
  -1 -15   3    2.67    0.27
   1 -15  -2    8.24    0.44
   1 -15  -2    7.98    0.29
  -1 -15   2    8.89    0.45
  -1 -15   2    8.21    0.43
   1 -15  -1    0.42    0.13
   1 -15  -1    0.36    0.06
  -1 -15   1    0.40    0.10
  -1 -15   1    0.43    0.15
   1 -15   0    1.25    0.15
   1 -15   0    1.25    0.19
  -1 -15   0    1.06    0.14
  -1 -15   0    1.21    0.20
   1 -15   1    0.57    0.13
   1 -15   1    0.43    0.08
   1 -15   1    0.44    0.14
  -1 -15  -1    0.58    0.13
  -1 -15  -1    0.37    0.08
   1 -15   2    0.14    0.09
   1 -15   2    0.08    0.10
  -1 -15  -2    0.07    0.08
   1 -15   3    0.09    0.08
   1 -15   3    0.07    0.08
  -1 -15  -3    0.03    0.04
   1 -15   4    0.08    0.09
   1 -15   4    0.10    0.07
   1 -15   5    0.01    0.06
   1 -15   5    0.05    0.05
   1 -15   6    0.61    0.09
  -1 -16   5    2.81    0.18
  -1 -16   4    0.22    0.09
  -1 -16   4    0.16    0.08
   1 -16  -3   13.49    0.46
  -1 -16   3   13.06    0.56
  -1 -16   3   14.08    0.53
   1 -16  -2    0.10    0.06
  -1 -16   2    0.17    0.10
  -1 -16   2    0.18    0.08
   1 -16  -1    3.21    0.18
  -1 -16   1    3.28    0.25
  -1 -16   1    3.03    0.15
   1 -16   0    0.80    0.11
  -1 -16   0    0.78    0.14
   1 -16   1    0.33    0.09
  -1 -16  -1    0.07    0.06
   1 -16   2    0.86    0.08
   1 -16   2    0.87    0.13
  -1 -16  -2    1.04    0.08
   1 -16   3    0.25    0.09
   1 -16   3    0.35    0.07
   2   0 -16   11.92    0.81
  -2   0  16   13.47    0.58
   2   0 -15    0.02    0.11
   2   0 -15    0.01    0.07
  -2   0  15   -0.11    0.10
   2   0 -14    0.57    0.17
   2   0 -14    0.40    0.24
  -2   0  14    0.38    0.20
   2   0 -13    0.16    0.15
   2   0 -13    0.17    0.22
  -2   0  13    0.17    0.21
  -2   0  13    0.26    0.14
   2   0 -12    1.75    0.28
   2   0 -12    1.80    0.31
  -2   0  12    1.59    0.24
  -2   0  12    1.41    0.33
   2   0 -11   -0.09    0.15
   2   0 -11    0.07    0.09
   2   0 -11    0.17    0.11
  -2   0  11    0.03    0.09
  -2   0  11   -0.19    0.17
   2   0 -10    0.53    0.13
   2   0 -10    0.63    0.16
   2   0 -10    0.58    0.18
   2   0 -10    0.68    0.31
  -2   0  10    0.38    0.23
  -2   0  10    0.57    0.14
   2   0  -9    0.11    0.22
   2   0  -9    0.03    0.12
   2   0  -9   -0.04    0.10
   2   0  -9    0.19    0.14
   2   0  -9    0.10    0.07
  -2   0   9    0.20    0.09
  -2   0   9    0.12    0.12
   2   0  -8   15.02    0.64
   2   0  -8   15.46    0.55
   2   0  -8   14.96    1.06
   2   0  -8   15.57    0.72
   2   0  -8   14.65    0.56
  -2   0   8   17.56    0.85
  -2   0   8   14.46    0.55
  -2   0   8   15.63    0.58
   2   0  -7    0.09    0.07
   2   0  -7    0.04    0.14
  -2   0   7   -0.02    0.11
  -2   0   7   -0.01    0.06
  -2   0   6   91.19    3.61
  -2   0   6   90.30    3.81
  -2   0   5    1.11    0.13
  -2   0   5    0.96    0.18
  -2   0   4 1018.67   92.52
  -2   0   4  898.64   81.96
   2   0  -3    3.20    0.21
   2   0  -2  219.92   11.54
  -2   0   2  262.26   13.19
   2   0  -1    3.71    0.11
  -2   0   1    3.34    0.15
   2   0   0  191.22    9.00
  -2   0   0  217.20   10.56
   2   0   1    0.50    0.06
  -2   0  -1    0.13    0.11
   2   0   2    0.63    0.09
  -2   0  -2    0.63    0.12
   2   0   3    0.24    0.09
  -2   0  -3    0.09    0.14
   2   0   4  127.73    5.84
  -2   0  -4  136.43    6.55
   2   0   5    1.95    0.26
  -2   0  -5    2.19    0.35
   2   0   6    2.39    0.25
  -2   0  -6    2.38    0.37
  -2   0  -6    2.34    0.18
  -2   0  -6    3.55    0.24
   2   0   7   -0.01    0.13
   2   0   7   -0.08    0.06
  -2   0  -7   -0.08    0.07
  -2   0  -7    0.02    0.11
  -2   0  -7   -0.01    0.13
   2   0   8    0.25    0.17
   2   0   8    0.03    0.10
  -2   0  -8    0.11    0.11
  -2   0  -8    0.16    0.21
  -2   0  -8    0.14    0.14
   2   0   9    0.12    0.21
   2   0   9    0.22    0.16
  -2   0  -9    0.12    0.13
  -2   0  -9    0.06    0.26
  -2   0  -9    0.23    0.18
   2   0  10    0.03    0.14
   2   0  10   -0.05    0.09
  -2   0 -10   -0.09    0.15
  -2   0 -10    0.09    0.11
  -2   0 -10    0.45    0.23
   2   0  11    0.11    0.10
   2   0  11   -0.12    0.17
  -2   0 -11    0.20    0.17
  -2   0 -11   -0.03    0.11
  -2   0 -11    0.02    0.29
   2   0  12    2.62    0.32
  -2   0 -12    2.63    0.47
  -2   0 -12    2.65    0.27
   2   0  13   -0.10    0.12
  -2   0 -13   -0.04    0.17
   2   0  14    0.28    0.12
  -2   0 -14    0.22    0.18
   2  -1 -16    3.00    0.34
   2   1 -16    2.37    0.40
  -2   1  16    3.64    0.29
  -2  -1  16    2.83    0.23
   2   1 -15    0.37    0.27
   2  -1 -15    0.69    0.24
   2  -1 -15    0.56    0.17
  -2  -1  15    1.16    0.21
  -2   1  15    0.99    0.20
   2   1 -14    0.20    0.14
   2   1 -14    0.00    0.08
   2  -1 -14   -0.10    0.10
   2  -1 -14   -0.05    0.09
  -2  -1  14   -0.04    0.11
  -2   1  14    0.04    0.10
   2  -1 -13   16.90    0.89
   2   1 -13   17.89    1.14
   2  -1 -13   16.72    0.89
   2   1 -13   16.13    0.77
  -2  -1  13   17.89    0.97
  -2   1  13   17.62    0.92
  -2   1  13   15.95    1.15
  -2  -1  13   16.39    1.30
   2  -1 -12   55.20    2.63
   2   1 -12   59.41    3.04
   2   1 -12   52.99    2.36
   2  -1 -12   54.07    2.56
   2  -1 -12   59.33    2.95
  -2  -1  12   56.29    2.81
  -2   1  12   55.39    3.05
  -2  -1  12   62.29    2.65
  -2  -1  12   53.46    2.37
   2  -1 -11    1.68    0.33
   2   1 -11    1.59    0.27
   2   1 -11    1.51    0.22
   2  -1 -11    1.38    0.32
   2  -1 -11    1.51    0.27
  -2  -1  11    1.28    0.35
  -2  -1  11    1.31    0.20
  -2   1  11    1.23    0.35
  -2  -1  11    1.35    0.25
   2   1 -10    0.22    0.15
   2  -1 -10    0.26    0.12
   2   1 -10    0.10    0.14
   2   1 -10    0.07    0.24
   2   1 -10    0.05    0.09
   2  -1 -10    0.03    0.09
   2  -1 -10    0.09    0.20
   2  -1 -10   -0.06    0.11
  -2  -1  10   -0.10    0.16
  -2   1  10   -0.00    0.16
  -2  -1  10    0.12    0.11
   2   1  -9    5.16    0.39
   2  -1  -9    4.28    0.33
   2   1  -9    4.79    0.41
   2  -1  -9    4.87    0.61
   2   1  -9    3.53    0.28
   2  -1  -9    4.99    0.37
   2   1  -9    4.60    0.28
   2  -1  -9    4.84    0.31
   2   1  -9    4.90    0.64
  -2   1   9    4.52    0.25
  -2  -1   9    4.72    0.32
  -2  -1   9    6.04    0.46
  -2   1   9    4.62    0.39
   2   1  -8   46.21    1.86
   2   1  -8   57.82    2.93
   2  -1  -8   50.65    1.87
   2   1  -8   54.56    2.00
   2  -1  -8   56.90    2.31
   2   1  -8   59.16    2.53
   2  -1  -8   55.38    2.16
   2  -1  -8   54.72    2.79
   2  -1  -8   56.56    2.16
   2   1  -8   58.21    2.18
  -2  -1   8   56.76    2.15
  -2  -1   8   55.41    2.00
  -2   1   8   54.78    2.42
  -2   1   8   56.23    2.03
  -2  -1   8   58.44    2.52
  -2   1   8   52.94    1.91
   2  -1  -7  212.33   11.04
   2  -1  -7  233.69   13.87
   2   1  -7  245.38   12.97
   2  -1  -7  246.51   13.35
   2   1  -7  223.36   13.35
   2  -1  -7  224.76   11.99
   2  -1  -7  238.57   12.68
  -2  -1   7  240.45   13.60
  -2   1   7  245.36   13.01
  -2   1   7  234.82   13.03
  -2  -1   7  240.16   13.11
   2  -1  -6  210.71   10.72
   2   1  -6  209.93   11.69
  -2  -1   6  219.52   11.76
  -2   1   6  188.39   10.38
  -2  -1   6  212.01   11.07
  -2   1   6  216.56   11.02
   2  -1  -5   89.44    3.45
  -2  -1   5   96.28    3.98
  -2  -1   5   91.47    3.82
  -2   1   5   92.47    3.96
   2  -1  -4  669.64   50.22
  -2  -1   4  624.77   48.09
  -2  -1   4  592.13   45.17
   2  -1  -3  756.55   58.07
   2  -1  -3  711.96   55.78
  -2  -1   3  597.30   47.48
  -2  -1   3  660.55   50.78
   2  -1  -2   13.52    0.44
   2   1  -2   15.19    0.48
   2  -1  -2   15.50    0.56
  -2  -1   2   14.34    0.51
  -2   1   2   13.47    0.33
   2  -1  -1  873.99   70.49
  -2  -1   1  647.40   53.13
  -2  -1   1  818.46   66.91
  -2   1   1  788.59   63.57
   2  -1   0    6.35    0.23
  -2  -1   0    6.41    0.27
  -2   1   0    6.48    0.23
   2  -1   1  156.51    6.90
   2   1   1  144.91    6.13
  -2   1  -1  152.78    6.72
  -2  -1  -1  147.62    6.24
  -2  -1  -1  157.88    7.32
   2  -1   2   41.88    1.39
   2   1   2   41.00    1.27
  -2  -1  -2   41.24    1.13
  -2  -1  -2   40.98    1.59
  -2   1  -2   41.77    1.49
   2  -1   3    2.11    0.19
  -2  -1  -3    1.80    0.28
  -2   1  -3    2.04    0.20
   2  -1   4   16.03    0.60
   2   1   4   16.51    0.63
  -2   1  -4   16.70    0.79
  -2  -1  -4   12.27    0.79
   2   1   5    5.65    0.36
   2  -1   5    5.87    0.40
  -2  -1  -5    5.46    0.54
  -2   1  -5    6.08    0.42
  -2   1  -5    6.17    0.29
   2  -1   6   35.36    1.61
   2   1   6   37.90    1.48
   2  -1   6   35.92    1.18
  -2  -1  -6   37.94    1.36
  -2  -1  -6   35.97    1.27
  -2   1  -6   35.77    1.38
  -2   1  -6   36.33    1.66
  -2   1  -6   34.03    1.15
  -2  -1  -6   36.21    1.75
  -2  -1  -6   38.46    1.40
   2  -1   7    6.87    0.31
   2   1   7    7.87    0.47
   2  -1   7    7.25    0.34
   2  -1   7    7.81    0.51
  -2   1  -7    7.92    0.51
  -2   1  -7    7.47    0.54
  -2   1  -7    7.01    0.34
  -2  -1  -7    7.02    0.56
  -2  -1  -7    7.52    0.36
  -2  -1  -7    7.04    0.42
  -2  -1  -7    8.01    0.46
   2  -1   8   20.03    0.81
   2   1   8   19.60    0.75
   2  -1   8   18.45    0.70
   2  -1   8   19.79    1.17
   2   1   8   19.74    1.09
  -2  -1  -8   19.74    0.88
  -2   1  -8   21.03    1.04
  -2  -1  -8   21.20    0.97
  -2   1  -8   20.43    1.27
  -2   1  -8   19.71    0.76
  -2  -1  -8   19.99    1.23
   2  -1   9   29.13    1.50
   2   1   9   30.51    1.23
   2  -1   9   28.42    1.09
   2   1   9   27.49    1.53
  -2  -1  -9   29.94    1.46
  -2   1  -9   28.02    1.60
  -2   1  -9   30.58    1.56
  -2  -1  -9   27.65    1.78
  -2  -1  -9   28.56    1.29
  -2   1  -9   26.81    1.10
   2  -1  10    3.55    0.38
   2   1  10    3.16    0.34
   2  -1  10    3.40    0.46
   2   1  10    2.80    0.43
  -2  -1 -10    2.86    0.71
  -2   1 -10    2.77    0.70
  -2  -1 -10    4.11    0.45
  -2  -1 -10    3.73    0.40
  -2   1 -10    3.33    0.28
  -2   1 -10    3.83    0.51
   2   1  11    0.21    0.14
   2  -1  11    0.02    0.29
   2  -1  11    0.26    0.13
   2   1  11    0.11    0.25
  -2   1 -11    0.35    0.19
  -2   1 -11    0.14    0.12
  -2   1 -11    0.27    0.36
  -2  -1 -11    0.10    0.16
  -2  -1 -11    0.06    0.20
   2   1  12    0.77    0.20
   2  -1  12    0.75    0.18
  -2  -1 -12    0.67    0.20
  -2  -1 -12    0.84    0.29
  -2   1 -12    0.88    0.27
   2  -1  13    0.07    0.10
   2   1  13    0.04    0.10
  -2  -1 -13    0.04    0.11
  -2  -1 -13   -0.06    0.10
  -2   1 -13    0.10    0.13
   2   1  14    0.19    0.09
   2  -1  14    0.22    0.12
  -2  -1 -14    0.30    0.16
  -2   1 -14    0.18    0.14
   2  -2 -16    0.62    0.10
   2   2 -16    0.04    0.19
   2  -2 -16    0.09    0.16
  -2  -2  16    0.14    0.13
  -2   2  16    0.32    0.11
   2   2 -15    0.97    0.30
   2  -2 -15    0.93    0.24
   2  -2 -15    0.97    0.17
  -2  -2  15    1.01    0.18
  -2   2  15    1.32    0.22
   2   2 -14    7.03    0.72
   2  -2 -14    7.36    0.59
   2  -2 -14    7.20    0.51
  -2  -2  14    8.18    0.53
  -2   2  14    8.07    0.47
   2   2 -13    0.77    0.29
   2  -2 -13    0.81    0.25
   2  -2 -13    0.78    0.23
  -2  -2  13    0.69    0.23
  -2  -2  13    0.49    0.17
   2   2 -12    6.34    0.41
   2  -2 -12    8.21    0.63
   2   2 -12    8.53    0.75
   2  -2 -12    6.70    0.62
   2  -2 -12    6.53    0.69
  -2  -2  12    7.17    0.56
  -2  -2  12    7.57    0.57
  -2   2  12    6.92    0.76
  -2  -2  12    7.82    0.79
   2  -2 -11    5.23    0.41
   2  -2 -11    6.34    0.51
   2   2 -11    5.36    0.35
   2  -2 -11    5.41    0.54
   2   2 -11    6.89    0.63
   2   2 -11    5.11    0.59
  -2  -2  11    6.49    0.66
  -2  -2  11    5.83    0.45
  -2  -2  11    5.69    0.49
  -2   2  11    6.82    0.52
   2  -2 -10    3.93    0.37
   2   2 -10    4.12    0.47
   2   2 -10    4.08    0.47
   2   2 -10    3.79    0.25
   2   2 -10    4.10    0.69
   2  -2 -10    3.33    0.35
   2  -2 -10    3.87    0.36
   2  -2 -10    4.44    0.64
  -2  -2  10    3.48    0.47
  -2   2  10    4.58    0.48
  -2  -2  10    3.79    0.26
  -2  -2  10    4.48    0.37
   2   2  -9    3.76    0.22
   2   2  -9    3.79    0.37
   2   2  -9    3.51    0.40
   2   2  -9    4.28    0.48
   2  -2  -9    4.05    0.26
   2  -2  -9    3.82    0.33
   2  -2  -9    3.38    0.58
   2  -2  -9    3.36    0.23
  -2  -2   9    3.35    0.21
  -2  -2   9    4.07    0.33
  -2  -2   9    4.06    0.34
  -2   2   9    4.66    0.41
   2   2  -8  181.90    9.13
   2  -2  -8  188.31    9.32
   2  -2  -8  187.40    9.56
   2  -2  -8  188.36    9.54
   2   2  -8  185.86   10.78
   2  -2  -8  184.96   10.67
   2   2  -8  195.19    9.94
  -2   2   8  200.35   10.62
  -2  -2   8  194.73   10.61
  -2  -2   8  187.97    9.70
  -2  -2   8  186.59    9.85
  -2   2   8  191.79    9.58
   2   2  -7  110.11    5.65
   2  -2  -7  111.79    4.82
   2  -2  -7  101.67    5.45
   2  -2  -7  115.02    4.88
   2  -2  -7  112.37    4.88
   2  -2  -7  109.34    4.57
   2   2  -7  116.77    5.06
  -2  -2   7  105.48    5.21
  -2  -2   7  115.55    5.00
  -2   2   7  109.48    4.67
  -2  -2   7  112.63    5.11
  -2   2   7  124.65    5.98
   2  -2  -6  518.02   36.51
   2  -2  -6  510.91   37.69
   2   2  -6  518.62   38.06
  -2  -2   6  555.94   40.33
  -2   2   6  507.63   37.22
  -2  -2   6  513.99   37.32
   2  -2  -5  204.92    9.70
   2  -2  -5  189.46    9.65
  -2  -2   5  194.14    9.85
  -2  -2   5  200.48   10.22
   2  -2  -4  101.15    4.28
  -2  -2   4  101.56    4.17
  -2  -2   4  106.02    4.34
   2  -2  -3   10.65    0.45
   2  -2  -3   10.10    0.36
  -2  -2   3    9.35    0.30
  -2  -2   3   10.35    0.39
   2  -2  -2  230.68   11.86
   2  -2  -2  231.56   11.81
   2   2  -2  222.00   11.38
  -2  -2   2  224.94   11.84
  -2  -2   2  222.03   10.86
  -2  -2   2  249.38   12.67
   2   2  -1    1.32    0.10
   2  -2  -1    1.40    0.15
  -2  -2   1    1.83    0.11
  -2   2   1    1.13    0.07
  -2  -2   1    1.45    0.14
   2  -2   0    2.06    0.14
  -2  -2   0    3.19    0.24
  -2  -2   0    1.90    0.14
   2   2   1  132.85    5.39
   2  -2   1  139.47    6.06
  -2  -2  -1  140.87    6.35
  -2   2  -1  135.56    5.89
  -2  -2  -1  138.43    5.83
   2   2   2    8.43    0.27
   2  -2   2    9.61    0.42
  -2  -2  -2    9.04    0.27
  -2  -2  -2    8.56    0.52
  -2   2  -2    8.87    0.34
   2   2   3    3.25    0.17
   2  -2   3    3.26    0.28
  -2  -2  -3    2.91    0.33
  -2  -2  -3    2.82    0.07
  -2   2  -3    2.78    0.23
   2   2   4   86.11    3.45
   2  -2   4   84.73    3.71
  -2  -2  -4   78.57    3.73
  -2   2  -4   85.30    3.74
   2   2   5    8.60    0.46
   2  -2   5    8.22    0.29
   2  -2   5    7.89    0.48
  -2  -2  -5    7.90    0.66
  -2  -2  -5    8.31    0.35
  -2   2  -5    8.82    0.34
  -2   2  -5    8.59    0.58
   2  -2   6  115.64    5.41
   2  -2   6  109.85    4.69
   2   2   6  110.37    5.13
   2  -2   6  108.50    4.60
  -2  -2  -6  103.70    4.45
  -2  -2  -6  115.35    4.93
  -2  -2  -6  104.53    5.37
  -2  -2  -6  111.42    4.89
  -2   2  -6  109.21    5.51
  -2   2  -6  115.20    5.16
   2  -2   7  101.79    4.39
   2  -2   7  104.74    5.07
   2  -2   7  104.30    4.54
   2   2   7   99.73    4.81
  -2  -2  -7  106.99    4.71
  -2  -2  -7   96.66    5.10
  -2   2  -7  111.27    5.14
  -2   2  -7  102.93    5.00
  -2   2  -7   96.35    4.12
  -2  -2  -7  109.43    4.87
  -2  -2  -7  103.49    4.52
   2  -2   8   11.57    0.87
   2  -2   8   11.05    0.53
   2   2   8   11.93    0.77
   2  -2   8   11.39    0.49
  -2  -2  -8   11.21    0.65
  -2  -2  -8   11.65    0.66
  -2  -2  -8   11.97    0.97
  -2   2  -8   12.23    0.80
  -2   2  -8   11.88    0.78
  -2   2  -8   10.26    0.45
  -2  -2  -8   12.95    0.63
   2   2   9    1.66    0.37
   2  -2   9    2.16    0.39
   2  -2   9    1.97    0.23
   2  -2   9    1.81    0.21
  -2  -2  -9    2.17    0.32
  -2  -2  -9    2.11    0.27
  -2   2  -9    1.83    0.51
  -2  -2  -9    2.03    0.49
  -2   2  -9    2.48    0.33
   2   2  10   25.39    1.03
   2  -2  10   26.31    1.26
   2  -2  10   23.08    1.69
   2   2  10   24.61    1.48
   2  -2  10   22.23    0.90
  -2   2 -10   25.53    1.88
  -2  -2 -10   23.67    1.28
  -2  -2 -10   23.06    1.91
  -2   2 -10   27.36    1.55
  -2  -2 -10   25.54    1.33
   2   2  11    1.62    0.52
   2  -2  11    2.55    0.52
   2  -2  11    2.58    0.30
   2   2  11    2.22    0.30
  -2  -2 -11    2.79    0.41
  -2  -2 -11    2.39    0.35
  -2   2 -11    2.71    0.52
  -2   2 -11    1.71    0.72
   2   2  12    0.31    0.17
   2  -2  12    0.50    0.16
  -2   2 -12    0.57    0.30
  -2  -2 -12    0.38    0.18
  -2  -2 -12    0.47    0.19
   2   2  13    3.69    0.31
   2  -2  13    4.02    0.35
  -2  -2 -13    3.25    0.26
  -2   2 -13    3.31    0.52
  -2  -2 -13    3.83    0.41
   2   2  14    0.38    0.10
   2  -2  14    0.34    0.14
  -2   2 -14    0.41    0.18
  -2  -2 -14    0.44    0.14
   2  -3 -16    1.14    0.17
   2   3 -16    2.06    0.26
  -2   3  16    0.98    0.18
  -2  -3  16    0.73    0.16
   2   3 -15    0.65    0.23
   2  -3 -15    1.26    0.18
   2  -3 -15    0.80    0.20
  -2  -3  15    0.89    0.17
  -2   3  15    1.20    0.17
   2   3 -14    0.09    0.14
   2  -3 -14    0.23    0.15
   2  -3 -14    0.18    0.15
  -2  -3  14   -0.02    0.11
  -2  -3  14    0.26    0.14
  -2   3  14    0.14    0.14
   2   3 -13    0.18    0.20
   2  -3 -13   -0.03    0.15
   2  -3 -13   -0.01    0.16
   2  -3 -13    0.27    0.19
  -2  -3  13    0.31    0.15
  -2  -3  13    0.14    0.12
   2  -3 -12   16.23    1.09
   2  -3 -12   16.96    1.02
   2   3 -12   17.13    1.13
   2  -3 -12   16.57    0.90
  -2   3  12   15.25    1.07
  -2  -3  12   16.35    0.99
  -2  -3  12   16.39    1.29
  -2  -3  12   17.49    0.90
   2  -3 -11   22.20    1.20
   2  -3 -11   21.71    1.01
   2  -3 -11   21.41    1.15
   2   3 -11   21.30    1.27
   2   3 -11   21.93    1.35
  -2  -3  11   20.81    1.22
  -2  -3  11   22.39    0.92
  -2   3  11   21.30    1.30
  -2  -3  11   21.42    1.12
   2  -3 -10   37.58    2.27
   2   3 -10   38.87    1.86
   2   3 -10   39.56    1.96
   2  -3 -10   38.90    1.62
   2  -3 -10   35.75    1.66
   2  -3 -10   32.81    1.45
  -2  -3  10   37.77    1.39
  -2  -3  10   36.51    1.69
  -2  -3  10   35.11    1.68
  -2   3  10   39.44    1.90
   2   3  -9    3.88    0.36
   2  -3  -9    3.79    0.29
   2  -3  -9    3.50    0.27
   2  -3  -9    5.03    0.46
   2  -3  -9    3.55    0.33
   2   3  -9    3.16    0.56
  -2  -3   9    3.86    0.25
  -2  -3   9    4.55    0.42
  -2   3   9    3.06    0.43
  -2  -3   9    3.60    0.36
   2   3  -8   32.89    1.79
   2  -3  -8   33.32    1.19
   2  -3  -8   33.09    1.32
   2   3  -8   35.51    1.31
   2  -3  -8   32.36    1.79
   2  -3  -8   33.41    1.10
  -2   3   8   36.75    1.52
  -2  -3   8   33.93    1.42
  -2  -3   8   33.65    1.36
  -2   3   8   33.52    1.09
  -2  -3   8   34.61    1.41
  -2  -3   8   33.45    1.08
   2   3  -7   14.09    0.50
   2  -3  -7   14.68    0.59
   2  -3  -7   13.18    0.89
   2  -3  -7   13.45    0.45
   2   3  -7   13.03    0.84
  -2  -3   7   13.84    0.52
  -2  -3   7   13.60    0.73
  -2  -3   7   14.05    0.68
  -2  -3   7   13.00    0.41
  -2   3   7   14.83    0.69
   2  -3  -6   33.77    1.61
   2  -3  -6   31.73    1.20
   2   3  -6   32.72    1.47
  -2  -3   6   34.19    1.40
  -2  -3   6   32.47    1.33
   2  -3  -5   71.30    2.87
  -2  -3   5   68.85    2.72
  -2  -3   5   70.88    2.89
   2  -3  -4   27.11    0.94
  -2  -3   4   26.44    1.04
  -2  -3   4   26.15    0.88
   2  -3  -3    1.06    0.13
   2  -3  -3    1.13    0.16
  -2  -3   3    1.01    0.11
  -2  -3   3    0.97    0.17
   2  -3  -2    4.06    0.24
   2  -3  -2    3.84    0.20
  -2  -3   2    4.67    0.30
  -2  -3   2    4.31    0.31
  -2   3   2    3.81    0.09
  -2  -3   2    4.05    0.16
   2   3  -1  260.74   14.14
   2  -3  -1  282.29   15.71
  -2  -3   1  272.51   14.45
  -2  -3   1  308.40   17.29
  -2  -3   1  276.32   15.50
   2  -3   0  152.23    6.99
  -2  -3   0  155.24    6.57
  -2  -3   0  148.80    6.86
  -2  -3   0  157.67    7.54
   2  -3   1   35.49    1.34
  -2  -3  -1   35.88    1.46
  -2  -3  -1   35.78    1.21
   2   3   2   43.55    1.41
   2  -3   2   43.61    1.75
  -2   3  -2   42.16    1.50
  -2  -3  -2   51.24    2.08
  -2  -3  -2   44.57    1.49
   2  -3   3   60.04    2.35
   2   3   3   57.99    2.07
  -2  -3  -3   60.65    2.03
  -2  -3  -3   59.81    2.49
  -2   3  -3   59.05    2.29
   2  -3   4    0.36    0.19
  -2  -3  -4    0.46    0.22
  -2   3  -4    0.33    0.18
   2   3   5  107.27    4.69
   2  -3   5  102.86    4.20
   2  -3   5  104.29    4.25
   2  -3   5  106.54    5.22
  -2  -3  -5  102.22    4.23
  -2   3  -5  104.67    4.48
  -2   3  -5  106.01    4.86
  -2  -3  -5   99.56    5.12
   2   3   6   14.46    0.77
   2  -3   6   14.92    0.55
   2  -3   6   15.57    0.86
   2  -3   6   14.41    0.51
  -2  -3  -6   14.18    0.52
  -2  -3  -6   14.69    0.64
  -2  -3  -6   15.01    0.56
  -2   3  -6   15.34    0.91
  -2   3  -6   14.61    0.62
  -2  -3  -6   13.60    0.97
   2  -3   7   46.70    2.43
   2   3   7   46.40    1.92
   2  -3   7   45.13    1.78
   2  -3   7   44.92    1.68
  -2  -3  -7   44.58    2.43
  -2   3  -7   47.33    2.33
  -2  -3  -7   45.84    1.94
  -2   3  -7   47.25    1.93
  -2  -3  -7   48.48    1.85
  -2  -3  -7   45.33    1.76
   2   3   8   10.99    0.72
   2  -3   8   11.73    0.61
   2  -3   8   12.09    0.99
   2  -3   8   11.87    0.63
  -2  -3  -8   12.43    0.61
  -2  -3  -8   11.55    0.71
  -2   3  -8   12.83    0.70
  -2  -3  -8   12.20    0.66
  -2  -3  -8   11.95    1.03
  -2   3  -8   11.00    0.77
   2   3   9    6.25    0.64
   2  -3   9    6.11    0.45
   2  -3   9    7.29    0.50
   2  -3   9    6.89    0.68
  -2  -3  -9    7.63    0.52
  -2  -3  -9    6.51    0.48
  -2   3  -9    5.91    0.68
  -2   3  -9    8.05    0.81
  -2  -3  -9    6.01    0.87
  -2  -3  -9    7.39    0.47
   2   3  10    0.10    0.11
   2   3  10    0.03    0.20
   2  -3  10    0.11    0.17
   2  -3  10    0.18    0.28
   2  -3  10    0.21    0.12
  -2   3 -10    0.16    0.29
  -2  -3 -10    0.20    0.16
  -2  -3 -10    0.08    0.19
  -2   3 -10    0.08    0.19
   2  -3  11    0.00    0.08
   2  -3  11    0.17    0.15
   2   3  11    0.07    0.09
  -2  -3 -11    0.19    0.15
  -2   3 -11   -0.03    0.20
  -2  -3 -11    0.08    0.14
   2   3  12    0.46    0.15
   2  -3  12    0.35    0.20
  -2  -3 -12    0.43    0.19
  -2  -3 -12    0.49    0.19
  -2   3 -12    0.32    0.29
   2   3  13    5.30    0.35
   2  -3  13    6.17    0.44
  -2  -3 -13    5.31    0.42
  -2   3 -13    5.92    0.63
   2  -3  14    4.52    0.32
   2   3  14    4.10    0.28
  -2  -3 -14    4.06    0.33
  -2   3 -14    5.02    0.39
   2  -4 -16    1.95    0.20
   2   4 -16    1.74    0.26
  -2   4  16    1.37    0.20
   2   4 -15    1.12    0.24
   2  -4 -15    0.72    0.16
  -2  -4  15    0.38    0.13
  -2   4  15    1.06    0.19
   2   4 -14    0.49    0.18
   2  -4 -14    0.52    0.19
  -2  -4  14    0.29    0.16
  -2  -4  14    0.35    0.17
   2   4 -13    2.83    0.41
   2  -4 -13    2.70    0.39
   2  -4 -13    2.53    0.40
   2  -4 -13    2.51    0.24
  -2  -4  13    3.05    0.34
  -2  -4  13    2.32    0.32
   2   4 -12   17.41    1.46
   2   4 -12   18.37    1.14
   2  -4 -12   17.93    1.06
   2  -4 -12   18.92    1.11
   2  -4 -12   19.21    0.91
  -2  -4  12   20.68    1.00
  -2  -4  12   19.19    1.50
  -2   4  12   17.62    1.27
  -2  -4  12   19.13    1.07
   2   4 -11    0.08    0.15
   2   4 -11    0.14    0.22
   2  -4 -11    0.06    0.12
   2  -4 -11    0.12    0.16
   2  -4 -11    0.06    0.18
  -2  -4  11    0.16    0.13
  -2  -4  11    0.05    0.18
  -2   4  11    0.32    0.20
  -2  -4  11    0.13    0.23
   2   4 -10   14.75    0.90
   2   4 -10   15.38    1.04
   2  -4 -10   15.80    0.91
   2  -4 -10   16.43    0.72
   2  -4 -10   15.71    0.82
  -2  -4  10   16.43    0.95
  -2   4  10   15.59    0.96
  -2  -4  10   15.63    0.72
  -2  -4  10   15.13    1.08
   2   4  -9    1.39    0.32
   2  -4  -9    1.39    0.17
   2  -4  -9    1.25    0.18
   2  -4  -9    1.34    0.21
   2  -4  -9    1.16    0.39
   2   4  -9    1.43    0.21
  -2  -4   9    1.21    0.32
  -2  -4   9    1.29    0.26
  -2  -4   9    1.09    0.31
  -2   4   9    1.12    0.25
  -2  -4   9    1.76    0.18
   2   4  -8    1.72    0.24
   2  -4  -8    1.61    0.17
   2  -4  -8    1.68    0.23
   2  -4  -8    2.03    0.37
   2  -4  -8    1.82    0.17
   2   4  -8    1.62    0.36
  -2  -4   8    2.18    0.30
  -2  -4   8    1.46    0.15
  -2  -4   8    1.84    0.26
  -2  -4   8    2.06    0.31
  -2  -4   8    1.35    0.16
  -2   4   8    1.72    0.33
   2   4  -7   89.09    3.65
   2   4  -7   83.04    3.89
   2  -4  -7   90.28    3.71
   2  -4  -7   86.88    3.39
   2  -4  -7   87.72    3.95
  -2  -4   7   86.86    3.64
  -2  -4   7   88.18    3.44
  -2  -4   7   87.54    3.95
  -2  -4   7   80.18    3.16
  -2   4   7   91.22    3.97
  -2  -4   7   83.80    3.87
   2  -4  -6    1.40    0.29
   2  -4  -6    1.16    0.10
   2  -4  -6    1.63    0.26
   2   4  -6    1.39    0.23
   2  -4  -6    1.38    0.15
  -2  -4   6    1.26    0.10
  -2  -4   6    1.58    0.24
  -2  -4   6    1.18    0.24
  -2  -4   6    1.32    0.13
   2   4  -5   24.53    0.99
   2  -4  -5   25.38    1.09
  -2  -4   5   24.97    1.02
  -2  -4   5   25.89    1.14
   2  -4  -4   29.90    1.20
  -2  -4   4   31.90    1.17
  -2  -4   4   31.59    1.30
   2  -4  -3   15.22    0.49
   2  -4  -3   16.93    0.65
  -2  -4   3   15.10    0.73
  -2  -4   3   16.53    0.57
   2  -4  -2   76.48    3.23
   2  -4  -2   76.22    2.88
  -2  -4   2   77.38    2.83
  -2  -4   2   83.84    3.39
  -2  -4   2   78.42    3.19
   2  -4  -1  323.95   20.32
  -2  -4   1  372.98   21.98
  -2  -4   1  349.68   21.51
  -2  -4   1  364.88   22.62
   2   4   0   33.90    0.95
   2  -4   0   34.53    1.28
  -2  -4   0   36.23    1.05
  -2  -4   0   35.14    1.47
  -2  -4   0   34.43    1.33
   2  -4   1    9.97    0.44
   2  -4   1    9.01    0.57
  -2  -4  -1   11.19    0.65
  -2  -4  -1   10.34    0.48
  -2  -4  -1   10.32    0.33
   2  -4   2   27.37    1.11
   2  -4   2   27.60    0.99
  -2  -4  -2   27.91    1.31
  -2  -4  -2   29.19    1.05
   2   4   3  309.84   18.27
   2  -4   3  311.85   18.43
   2  -4   3  310.82   19.04
  -2  -4  -3  319.54   18.68
  -2  -4  -3  325.29   20.35
   2  -4   4    9.75    0.37
   2  -4   4   10.30    0.38
   2  -4   4    8.93    0.59
   2   4   4    9.91    0.45
  -2   4  -4    9.77    0.62
  -2  -4  -4   10.78    0.41
  -2  -4  -4   10.11    0.74
   2   4   5  191.34    9.96
   2  -4   5  198.94   10.01
   2  -4   5  199.73   11.19
   2  -4   5  197.53   10.00
  -2  -4  -5  198.74   10.22
  -2  -4  -5  180.87   10.42
  -2   4  -5  191.59    9.89
  -2   4  -5  195.21   11.01
  -2  -4  -5  210.38   10.32
   2  -4   6   52.91    2.12
   2  -4   6   51.14    2.54
   2  -4   6   51.54    1.98
   2   4   6   52.91    2.21
  -2  -4  -6   47.03    2.41
  -2   4  -6   50.55    2.08
  -2   4  -6   51.71    2.52
  -2  -4  -6   56.05    2.00
  -2  -4  -6   52.32    2.13
   2   4   7   11.32    0.67
   2  -4   7   11.61    0.60
   2  -4   7   11.65    0.63
   2  -4   7   11.99    0.95
  -2  -4  -7   11.72    0.67
  -2  -4  -7   12.34    0.52
  -2  -4  -7   12.76    0.58
  -2  -4  -7   11.19    0.91
  -2   4  -7   10.72    0.88
  -2   4  -7   11.13    0.71
   2  -4   8    1.48    0.21
   2   4   8    0.98    0.29
   2  -4   8    1.36    0.26
   2  -4   8    1.40    0.33
  -2  -4  -8    1.18    0.44
  -2  -4  -8    1.54    0.30
  -2  -4  -8    1.28    0.22
  -2  -4  -8    1.26    0.26
  -2   4  -8    1.47    0.26
  -2   4  -8    1.32    0.31
   2   4   9    0.09    0.21
   2  -4   9    0.25    0.28
   2  -4   9    0.24    0.17
   2  -4   9    0.20    0.16
  -2  -4  -9    0.17    0.15
  -2  -4  -9    0.28    0.15
  -2  -4  -9    0.23    0.18
  -2   4  -9    0.19    0.26
  -2   4  -9    0.21    0.23
   2   4  10   25.92    1.57
   2  -4  10   27.03    1.89
   2  -4  10   27.70    1.37
   2  -4  10   25.39    1.18
  -2  -4 -10   26.33    1.28
  -2  -4 -10   27.05    1.21
  -2   4 -10   27.03    1.86
  -2   4 -10   28.69    1.49
   2   4  11    0.11    0.09
   2  -4  11    0.06    0.10
   2  -4  11    0.10    0.16
  -2   4 -11    0.05    0.21
  -2  -4 -11    0.19    0.16
   2   4  12    8.28    0.44
   2  -4  12    7.92    0.50
  -2  -4 -12    8.83    0.59
  -2   4 -12    8.88    0.76
   2   4  13    0.06    0.08
   2  -4  13    0.02    0.11
  -2  -4 -13    0.00    0.11
  -2   4 -13    0.04    0.12
   2  -4  14    0.56    0.15
   2   4  14    0.51    0.11
  -2  -4 -14    0.48    0.16
  -2   4 -14    0.63    0.21
  -2   5  16    0.17    0.09
   2   5 -15    0.40    0.20
   2  -5 -15    0.19    0.17
  -2  -5  15    0.61    0.13
  -2  -5  15    0.37    0.13
  -2   5  15    0.58    0.13
   2   5 -14    2.83    0.40
   2  -5 -14    3.14    0.40
  -2  -5  14    3.68    0.30
  -2  -5  14    3.76    0.32
   2   5 -13    0.74    0.25
   2  -5 -13    0.40    0.22
   2  -5 -13    0.86    0.26
  -2  -5  13    1.07    0.21
  -2  -5  13    0.67    0.22
   2   5 -12   16.03    0.93
   2   5 -12   16.67    1.43
   2  -5 -12   14.72    0.97
   2  -5 -12   15.21    0.99
  -2  -5  12   15.75    0.82
  -2  -5  12   15.50    0.82
  -2  -5  12   15.10    1.37
  -2   5  12   14.22    1.12
   2   5 -11   28.67    1.54
   2   5 -11   30.28    1.86
   2  -5 -11   30.65    1.57
   2  -5 -11   31.00    1.59
  -2  -5  11   27.22    1.92
  -2   5  11   27.23    1.45
  -2  -5  11   29.25    1.30
  -2  -5  11   31.60    1.50
   2   5 -10    5.59    0.41
   2   5 -10    6.15    0.64
   2  -5 -10    5.89    0.54
   2  -5 -10    4.91    0.36
  -2  -5  10    6.25    0.56
  -2  -5  10    3.92    0.54
  -2   5  10    5.65    0.57
  -2  -5  10    5.61    0.38
   2   5  -9    1.25    0.20
   2  -5  -9    1.28    0.22
   2  -5  -9    1.25    0.22
   2  -5  -9    0.86    0.33
  -2  -5   9    0.81    0.31
  -2  -5   9    2.45    0.35
  -2  -5   9    1.07    0.30
  -2   5   9    1.16    0.34
   2   5  -8   16.37    0.87
   2   5  -8   15.21    0.76
   2  -5  -8   15.81    0.78
   2  -5  -8   16.68    0.65
   2  -5  -8   17.08    1.04
  -2  -5   8   16.20    0.59
  -2  -5   8   16.10    0.96
  -2  -5   8   17.01    0.63
  -2  -5   8   15.99    0.94
  -2   5   8   16.41    0.99
  -2  -5   8   15.88    0.81
   2   5  -7   42.32    1.60
   2   5  -7   41.69    1.91
   2  -5  -7   42.76    1.54
   2  -5  -7   42.17    1.92
   2  -5  -7   42.91    1.49
  -2  -5   7   42.89    1.52
  -2  -5   7   41.89    2.00
  -2  -5   7   42.76    1.73
  -2  -5   7   39.26    1.40
  -2  -5   7   41.04    1.87
  -2  -5   7   41.87    1.43
   2   5  -6   69.67    2.67
   2   5  -6   67.47    2.90
   2  -5  -6   72.74    3.34
   2  -5  -6   71.13    2.61
   2  -5  -6   75.74    3.36
   2  -5  -6   73.51    2.85
  -2  -5   6   72.70    3.28
  -2  -5   6   72.30    2.90
  -2  -5   6   75.82    3.25
  -2  -5   6   73.95    2.71
  -2  -5   6   72.26    2.70
   2   5  -5  112.17    5.08
   2  -5  -5  126.99    5.99
   2  -5  -5  118.59    4.82
   2  -5  -5  119.72    5.68
  -2  -5   5  121.61    5.16
  -2  -5   5  116.93    4.91
  -2  -5   5  125.42    5.93
  -2  -5   5  116.96    5.07
  -2  -5   5  120.54    5.86
   2   5  -4   33.86    1.18
   2  -5  -4   36.10    1.54
  -2  -5   4   36.07    1.40
  -2  -5   4   35.48    1.56
   2  -5  -3    0.25    0.12
  -2  -5   3    0.10    0.12
  -2  -5   3    0.08    0.09
   2  -5  -2  149.01    7.30
   2  -5  -2  144.14    6.38
  -2  -5   2  144.29    6.51
  -2  -5   2  145.42    7.27
   2  -5  -1  323.10   20.04
  -2  -5   1  323.38   20.12
  -2  -5   1  321.28   18.82
  -2  -5   1  330.83   20.36
   2  -5   0   93.70    4.15
   2  -5   0   95.10    3.93
  -2  -5   0   90.23    3.48
  -2  -5   0   97.11    4.09
  -2  -5   0   84.96    4.02
   2  -5   1  142.37    7.11
   2  -5   1  141.47    6.75
  -2  -5  -1  143.54    6.91
  -2  -5  -1  142.13    7.16
  -2  -5  -1  148.55    6.56
   2  -5   2    3.48    0.31
   2  -5   2    2.64    0.36
  -2  -5  -2    3.12    0.44
  -2  -5  -2    3.08    0.22
  -2  -5  -2    3.59    0.29
   2   5   3  375.90   23.82
   2  -5   3  363.44   22.44
   2  -5   3  371.87   23.26
   2  -5   3  374.83   24.03
   2  -5   3  372.14   25.04
  -2  -5  -3  376.66   24.00
  -2  -5  -3  387.44   25.51
   2   5   4    6.53    0.35
   2  -5   4    6.72    0.32
   2  -5   4    6.86    0.32
   2  -5   4    6.77    0.57
   2  -5   4    6.20    0.34
  -2  -5  -4    6.22    0.58
  -2  -5  -4    6.25    0.28
  -2  -5  -4    6.66    0.28
  -2   5  -4    6.25    0.48
  -2   5  -4    6.65    0.28
   2   5   5    8.34    0.43
   2  -5   5    8.04    0.44
   2  -5   5    7.84    0.64
   2  -5   5    8.18    0.41
  -2  -5  -5    8.20    0.28
  -2  -5  -5    8.11    0.35
  -2  -5  -5    7.45    0.62
  -2  -5  -5    7.72    0.43
  -2   5  -5    7.64    0.42
  -2   5  -5    7.37    0.60
   2   5   6   27.01    1.15
   2  -5   6   28.67    1.23
   2  -5   6   28.04    1.13
   2  -5   6   27.09    1.40
  -2  -5  -6   25.94    1.45
  -2  -5  -6   27.01    1.01
  -2  -5  -6   29.65    0.97
  -2  -5  -6   30.25    1.25
  -2   5  -6   27.39    1.08
  -2   5  -6   26.58    1.37
   2   5   7   15.34    0.85
   2  -5   7   15.75    1.12
   2  -5   7   15.91    0.74
   2  -5   7   16.47    0.81
  -2  -5  -7   14.11    1.08
  -2  -5  -7   16.48    0.67
  -2  -5  -7   14.17    0.61
  -2  -5  -7   16.37    0.77
  -2   5  -7   15.33    0.89
  -2   5  -7   15.32    1.08
   2   5   8   41.43    1.83
   2  -5   8   44.60    2.30
   2  -5   8   45.65    1.87
   2  -5   8   44.24    2.05
  -2  -5  -8   44.53    1.95
  -2  -5  -8   37.80    2.33
  -2  -5  -8   39.94    1.60
  -2  -5  -8   44.44    1.87
  -2   5  -8   45.03    2.04
  -2   5  -8   42.58    2.21
   2   5   9    7.02    0.63
   2  -5   9    8.42    0.61
   2  -5   9    8.63    0.91
   2  -5   9    8.65    0.64
  -2  -5  -9    7.67    0.68
  -2  -5  -9    8.80    0.59
  -2   5  -9    8.18    0.87
  -2   5  -9    8.09    0.64
   2   5  10    3.86    0.52
   2  -5  10    4.54    0.33
   2  -5  10    3.32    0.61
   2  -5  10    4.33    0.39
  -2  -5 -10    4.18    0.50
  -2  -5 -10    4.03    0.28
  -2   5 -10    3.67    0.76
  -2   5 -10    4.04    0.56
   2   5  11    0.46    0.14
   2  -5  11    0.41    0.16
   2  -5  11    0.67    0.22
  -2  -5 -11    0.69    0.19
  -2   5 -11    0.60    0.26
   2   5  12    5.98    0.34
   2  -5  12    5.48    0.33
   2  -5  12    6.76    0.41
  -2  -5 -12    5.10    0.50
  -2   5 -12    6.43    0.60
   2   5  13    0.26    0.10
   2  -5  13    0.46    0.17
  -2  -5 -13    0.29    0.16
  -2   5 -13    0.70    0.21
   2  -5  14    0.34    0.11
  -2  -5 -14    0.80    0.15
  -2   5 -14    0.82    0.20
   2   6 -15    0.21    0.13
   2  -6 -15    0.18    0.12
  -2  -6  15   -0.01    0.09
  -2  -6  15    0.05    0.08
  -2   6  15    0.09    0.10
   2   6 -14    0.31    0.17
   2  -6 -14    0.29    0.15
   2  -6 -14    0.17    0.18
  -2  -6  14    0.18    0.12
  -2  -6  14    0.38    0.15
   2  -6 -13    0.93    0.23
   2  -6 -13    1.01    0.29
   2   6 -13    0.95    0.25
  -2  -6  13    1.05    0.20
  -2  -6  13    0.59    0.19
   2  -6 -12    1.31    0.27
   2   6 -12    1.53    0.28
   2  -6 -12    1.46    0.27
  -2  -6  12    0.89    0.22
  -2  -6  12    1.55    0.29
   2  -6 -11    1.68    0.31
   2   6 -11    1.70    0.32
   2   6 -11    1.71    0.51
   2  -6 -11    2.37    0.36
  -2  -6  11    2.25    0.31
  -2  -6  11    0.85    0.50
  -2   6  11    1.74    0.38
  -2  -6  11    1.61    0.21
   2   6 -10    4.59    0.45
   2  -6 -10    4.69    0.37
   2  -6 -10    4.84    0.52
  -2  -6  10    5.72    0.47
  -2  -6  10    4.09    0.35
  -2  -6  10    3.36    0.64
  -2   6  10    4.90    0.45
   2  -6  -9   35.34    1.69
   2   6  -9   34.37    1.51
   2  -6  -9   37.13    1.57
  -2  -6   9   35.53    1.93
  -2  -6   9   31.98    1.21
  -2  -6   9   36.52    1.80
  -2  -6   9   32.36    1.82
  -2   6   9   36.72    1.95
   2   6  -8    6.64    0.43
   2  -6  -8    7.64    0.41
   2  -6  -8    7.18    0.57
   2  -6  -8    7.17    0.42
  -2  -6   8    7.47    0.37
  -2  -6   8    7.97    0.68
  -2  -6   8    7.10    0.62
  -2  -6   8    7.79    0.48
  -2  -6   8    7.57    0.38
  -2   6   8    6.73    0.65
   2  -6  -7   14.65    0.58
   2  -6  -7   15.53    0.87
   2   6  -7   15.29    0.62
   2  -6  -7   16.07    0.90
   2  -6  -7   15.33    0.68
  -2  -6   7   13.77    0.53
  -2  -6   7   14.57    0.56
  -2  -6   7   15.10    0.79
  -2  -6   7   14.65    0.61
  -2  -6   7   15.04    0.98
  -2  -6   7   14.93    0.84
   2  -6  -6  104.63    4.50
   2  -6  -6  110.80    5.29
   2   6  -6  102.00    4.53
   2   6  -6  100.44    4.27
   2  -6  -6  108.60    4.40
   2  -6  -6  103.08    4.02
   2  -6  -6  102.98    4.80
  -2  -6   6  104.93    4.48
  -2  -6   6  106.97    4.59
  -2  -6   6  103.66    4.52
  -2  -6   6  107.27    5.13
  -2  -6   6  104.24    4.33
  -2  -6   6  107.37    5.43
   2  -6  -5  110.42    4.65
   2   6  -5  105.66    4.66
   2  -6  -5  112.50    5.34
   2  -6  -5  109.26    5.01
   2  -6  -5  105.35    4.35
   2  -6  -5  111.94    4.44
  -2  -6   5  108.24    5.05
  -2  -6   5  110.30    5.56
  -2  -6   5  109.57    4.71
  -2  -6   5  107.91    4.52
  -2  -6   5  110.08    4.76
   2  -6  -4  145.05    7.14
   2  -6  -4  141.47    6.14
   2  -6  -4  136.56    5.81
   2   6  -4  130.34    5.88
   2  -6  -4  143.94    6.74
  -2  -6   4  142.71    6.48
  -2  -6   4  139.97    6.31
  -2  -6   4  145.46    7.00
  -2  -6   4  147.36    6.64
  -2  -6   4  144.74    7.47
   2  -6  -3   47.00    1.58
   2  -6  -3   47.32    1.67
   2  -6  -3   49.03    2.21
  -2  -6   3   48.10    1.60
  -2  -6   3   46.70    1.58
  -2  -6   3   49.43    1.89
  -2  -6   3   47.67    2.06
   2  -6  -2  123.04    5.13
   2  -6  -2  120.20    5.60
  -2  -6   2  117.07    5.10
  -2  -6   2  117.04    5.74
   2  -6  -1   15.13    0.88
  -2  -6   1   15.82    0.90
  -2  -6   1   15.95    0.56
   2  -6   0   57.67    2.62
   2  -6   0   57.97    2.28
  -2  -6   0   58.77    2.71
  -2  -6   0   58.13    2.10
  -2  -6   0   59.72    2.62
   2  -6   1   55.11    2.29
   2  -6   1   55.06    2.56
   2  -6   1   53.84    1.91
  -2  -6  -1   55.31    2.00
  -2  -6  -1   56.51    2.56
  -2  -6  -1   58.40    2.52
   2  -6   2   10.34    0.72
   2  -6   2   10.60    0.35
   2  -6   2   10.08    0.40
   2  -6   2    9.74    0.55
   2  -6   2   10.21    0.35
  -2  -6  -2   10.43    0.60
  -2  -6  -2   10.60    0.42
  -2  -6  -2   11.12    0.62
   2  -6   3  135.33    5.91
   2  -6   3  136.84    6.10
   2  -6   3  138.77    6.93
   2  -6   3  127.10    6.22
   2  -6   3  138.91    6.31
  -2  -6  -3  142.93    6.37
  -2  -6  -3  139.80    6.22
  -2  -6  -3  141.02    7.20
  -2  -6  -3  139.90    6.66
   2   6   4    8.31    0.40
   2  -6   4    7.09    0.27
   2  -6   4    7.64    0.35
   2  -6   4    7.84    0.57
   2  -6   4    7.95    0.42
   2  -6   4    7.53    0.34
  -2  -6  -4    7.09    0.64
  -2  -6  -4    7.68    0.33
  -2   6  -4    7.44    0.40
  -2  -6  -4    7.46    0.32
  -2  -6  -4    7.86    0.22
   2   6   5   17.52    0.74
   2  -6   5   17.86    0.76
   2  -6   5   17.70    1.11
   2  -6   5   16.53    0.75
  -2  -6  -5   17.19    0.51
  -2  -6  -5   16.16    1.01
  -2  -6  -5   16.25    0.60
  -2   6  -5   16.78    0.73
  -2   6  -5   15.45    0.99
  -2  -6  -5   17.02    0.73
   2  -6   6    0.18    0.06
   2  -6   6    0.09    0.15
   2  -6   6    0.14    0.22
   2  -6   6    0.05    0.13
  -2  -6  -6    0.38    0.21
  -2  -6  -6    0.14    0.14
  -2  -6  -6    0.09    0.09
  -2   6  -6    0.07    0.14
  -2   6  -6   -0.03    0.21
   2   6   7    1.57    0.28
   2  -6   7    1.82    0.24
   2  -6   7    2.27    0.32
   2  -6   7    1.88    0.37
  -2  -6  -7    1.71    0.20
  -2  -6  -7    1.15    0.43
  -2  -6  -7    1.08    0.18
  -2   6  -7    2.01    0.35
  -2   6  -7    1.55    0.32
  -2  -6  -7    1.61    0.31
   2   6   8    9.02    0.67
   2  -6   8   11.03    0.58
   2  -6   8    9.52    0.90
   2  -6   8   10.04    0.63
  -2  -6  -8    9.50    0.61
  -2  -6  -8   10.77    0.56
  -2   6  -8   10.78    0.77
  -2   6  -8    9.16    0.94
   2   6   9    6.68    0.53
   2  -6   9    8.66    0.80
   2  -6   9    8.44    0.63
   2  -6   9    7.89    0.53
  -2  -6  -9    8.53    0.55
  -2  -6  -9    7.65    0.68
  -2   6  -9    8.05    0.92
  -2   6  -9    8.08    0.72
   2  -6  10    0.37    0.19
   2  -6  10    0.27    0.16
  -2  -6 -10    0.31    0.22
  -2  -6 -10    0.26    0.13
  -2   6 -10    0.23    0.21
   2   6  11    3.95    0.22
   2  -6  11    5.57    0.38
   2  -6  11    4.60    0.34
  -2  -6 -11    4.40    0.39
  -2   6 -11    4.59    0.43
   2   6  12    0.11    0.08
   2  -6  12    0.18    0.10
   2  -6  12    0.11    0.15
  -2  -6 -12    0.20    0.15
  -2   6 -12    0.07    0.14
   2   6  13    0.01    0.05
   2  -6  13    0.05    0.10
  -2   6 -13    0.01    0.09
  -2  -6 -13   -0.00    0.10
   2  -7 -15    9.77    0.47
  -2   7  15    9.47    0.43
   2   7 -14    1.55    0.25
   2  -7 -14    2.01    0.24
   2  -7 -14    1.73    0.24
  -2  -7  14    0.71    0.17
  -2  -7  14    1.75    0.24
   2   7 -13    3.64    0.38
   2  -7 -13    3.68    0.46
   2  -7 -13    3.70    0.47
  -2  -7  13    3.04    0.27
  -2  -7  13    3.39    0.40
   2   7 -12    3.33    0.38
   2  -7 -12    3.39    0.47
   2  -7 -12    2.81    0.41
  -2  -7  12    3.25    0.30
  -2  -7  12    3.23    0.34
   2   7 -11    4.23    0.75
   2  -7 -11    5.22    0.54
   2   7 -11    4.76    0.44
   2  -7 -11    5.04    0.47
  -2  -7  11    5.35    0.53
  -2  -7  11    5.09    0.36
  -2   7  11    3.56    0.58
   2   7 -10    5.12    0.43
   2  -7 -10    5.37    0.40
   2  -7 -10    5.67    0.54
  -2  -7  10    4.43    0.74
  -2  -7  10    5.92    0.59
  -2  -7  10    4.97    0.36
  -2   7  10    4.57    0.48
   2   7  -9    8.74    0.53
   2  -7  -9    9.40    0.64
   2  -7  -9    8.50    0.54
  -2   7   9   10.00    0.76
  -2  -7   9    9.68    0.74
  -2  -7   9    9.51    0.44
  -2  -7   9    7.41    0.45
  -2  -7   9    8.59    0.80
  -2  -7   9    7.61    0.82
   2  -7  -8    5.65    0.37
   2   7  -8    5.28    0.35
   2  -7  -8    6.15    0.49
  -2  -7   8    5.15    0.63
  -2  -7   8    6.65    0.38
  -2  -7   8    6.86    0.71
  -2  -7   8    6.66    0.54
  -2  -7   8    5.05    0.31
  -2   7   8    6.07    0.57
   2   7  -7    7.65    0.36
   2  -7  -7    7.87    0.46
   2  -7  -7    6.86    0.62
   2  -7  -7    7.13    0.38
   2  -7  -7    7.56    0.25
  -2  -7   7    7.43    0.62
  -2  -7   7    8.37    0.46
  -2  -7   7    8.47    0.56
  -2  -7   7    7.02    0.33
  -2  -7   7    8.01    0.75
  -2  -7   7    8.06    0.39
   2  -7  -6   54.04    2.02
   2  -7  -6   54.08    2.31
   2  -7  -6   53.54    2.03
   2  -7  -6   54.06    1.79
  -2  -7   6   55.78    2.26
  -2  -7   6   53.83    2.71
  -2  -7   6   46.43    1.67
  -2  -7   6   52.66    2.11
  -2  -7   6   51.34    1.94
  -2  -7   6   49.12    2.23
   2  -7  -5    6.54    0.30
   2  -7  -5    6.57    0.54
   2  -7  -5    6.35    0.23
   2  -7  -5    6.67    0.30
  -2  -7   5    5.93    0.50
  -2  -7   5    6.85    0.38
  -2  -7   5    6.68    0.24
  -2  -7   5    7.49    0.67
  -2  -7   5    6.47    0.39
  -2  -7   5    6.83    0.37
   2  -7  -4    0.22    0.06
   2  -7  -4    0.34    0.15
   2  -7  -4    0.30    0.06
   2  -7  -4    0.27    0.09
  -2  -7   4    0.38    0.19
  -2  -7   4    0.44    0.16
  -2  -7   4    0.24    0.11
  -2  -7   4    0.44    0.11
  -2  -7   4    0.30    0.10
   2  -7  -3    2.00    0.31
   2  -7  -3    1.54    0.11
   2  -7  -3    1.99    0.16
   2  -7  -3    1.40    0.13
  -2  -7   3    1.60    0.19
  -2  -7   3    1.63    0.14
  -2  -7   3    1.96    0.22
  -2  -7   3    1.41    0.14
  -2  -7   3    1.62    0.38
   2  -7  -2   88.25    3.53
   2  -7  -2   91.92    3.51
   2  -7  -2   91.71    3.52
   2  -7  -2   92.42    4.15
  -2  -7   2   94.06    3.97
  -2  -7   2   97.21    4.45
  -2  -7   2   91.90    3.69
  -2  -7   2   95.58    3.89
   2  -7  -1   39.39    1.85
   2  -7  -1   37.61    1.28
   2  -7  -1   38.84    1.22
   2  -7  -1   40.14    1.38
  -2  -7   1   44.32    1.47
  -2  -7   1   40.98    1.50
  -2  -7   1   40.65    1.97
  -2  -7   1   41.18    1.47
   2  -7   0    2.21    0.16
   2  -7   0    2.59    0.20
   2  -7   0    2.16    0.15
   2  -7   0    1.99    0.15
   2  -7   0    2.54    0.36
   2  -7   0    2.19    0.12
  -2  -7   0    2.25    0.36
  -2  -7   0    2.55    0.17
  -2  -7   0    2.48    0.18
  -2  -7   0    2.05    0.19
  -2  -7   0    2.37    0.28
   2  -7   1   27.15    0.89
   2  -7   1   27.62    0.91
   2  -7   1   25.54    1.33
   2  -7   1   27.59    1.28
   2  -7   1   26.18    0.92
  -2  -7  -1   26.99    0.92
  -2  -7  -1   26.74    1.34
  -2  -7  -1   26.00    1.26
  -2  -7  -1   28.78    0.87
  -2  -7  -1   27.71    0.90
   2  -7   2   18.80    0.72
   2  -7   2   19.75    0.63
   2  -7   2   18.26    1.13
   2  -7   2   19.50    0.64
   2  -7   2   19.40    0.97
  -2  -7  -2   21.00    0.67
  -2  -7  -2   20.13    1.04
  -2  -7  -2   18.53    0.91
  -2  -7  -2   19.18    0.61
  -2  -7  -2   20.25    0.74
  -2  -7  -2   19.27    0.64
   2  -7   3    4.33    0.41
   2  -7   3    4.15    0.29
   2  -7   3    3.90    0.22
   2  -7   3    3.92    0.29
   2  -7   3    4.88    0.52
  -2  -7  -3    4.24    0.46
  -2  -7  -3    4.41    0.38
  -2  -7  -3    3.58    0.12
  -2  -7  -3    4.04    0.24
  -2  -7  -3    4.34    0.23
   2   7   4   50.71    1.99
   2  -7   4   52.44    1.98
   2  -7   4   47.55    2.49
   2  -7   4   54.28    2.19
   2  -7   4   52.71    1.85
   2  -7   4   51.67    2.06
  -2  -7  -4   51.22    2.42
  -2  -7  -4   51.28    1.65
  -2  -7  -4   50.44    1.94
  -2  -7  -4   52.38    1.91
  -2   7  -4   48.65    1.96
   2   7   5    6.65    0.42
   2  -7   5    6.58    0.27
   2  -7   5    6.53    0.45
   2  -7   5    6.93    0.49
   2  -7   5    7.15    0.72
  -2  -7  -5    6.67    0.44
  -2  -7  -5    7.34    0.35
  -2  -7  -5    6.90    0.63
  -2   7  -5    5.96    0.42
  -2   7  -5    6.43    0.62
  -2  -7  -5    6.69    0.25
   2   7   6   33.43    1.45
   2  -7   6   34.20    1.19
   2  -7   6   34.05    1.81
   2  -7   6   35.73    1.49
   2  -7   6   35.40    1.45
  -2  -7  -6   34.41    1.55
  -2  -7  -6   33.13    1.80
  -2  -7  -6   34.23    1.24
  -2  -7  -6   34.52    1.19
  -2   7  -6   34.37    1.92
  -2   7  -6   32.70    1.48
   2   7   7    1.05    0.25
   2  -7   7    1.20    0.31
   2  -7   7    1.07    0.12
   2  -7   7    1.04    0.36
   2  -7   7    1.29    0.28
  -2  -7  -7    1.25    0.16
  -2  -7  -7    1.09    0.29
  -2   7  -7    1.21    0.41
  -2   7  -7    1.35    0.28
   2   7   8    6.80    0.60
   2  -7   8    7.65    0.55
   2  -7   8    7.59    0.76
   2  -7   8    7.39    0.50
  -2  -7  -8    8.08    0.46
  -2  -7  -8    7.46    0.54
  -2   7  -8    6.99    0.53
  -2   7  -8    7.39    0.84
   2   7   9    0.04    0.17
   2  -7   9    0.02    0.12
   2  -7   9    0.11    0.15
   2  -7   9    0.28    0.28
  -2   7  -9    0.06    0.25
  -2   7  -9    0.13    0.16
  -2  -7  -9    0.14    0.14
  -2  -7  -9    0.01    0.13
   2  -7  10    0.36    0.20
   2  -7  10    0.30    0.17
  -2  -7 -10    0.32    0.16
  -2  -7 -10    0.37    0.18
  -2   7 -10    0.34    0.17
   2  -7  11    1.92    0.29
   2   7  11    1.59    0.16
   2  -7  11    1.66    0.24
  -2  -7 -11    1.52    0.32
  -2   7 -11    1.78    0.34
   2   7  12    0.66    0.11
   2  -7  12    0.76    0.15
   2  -7  12    0.75    0.16
  -2  -7 -12    0.69    0.21
  -2   7 -12    0.88    0.23
   2  -7  13    0.41    0.14
  -2  -7 -13    0.45    0.16
  -2   7 -13    0.49    0.17
   2   8 -14   -0.00    0.07
   2  -8 -14    0.03    0.10
  -2  -8  14   -0.02    0.06
   2   8 -13   -0.00    0.11
   2  -8 -13    0.39    0.19
   2  -8 -13    0.44    0.18
  -2  -8  13    0.27    0.16
   2   8 -12    5.37    0.41
   2  -8 -12    6.03    0.54
   2  -8 -12    5.36    0.48
  -2  -8  12    5.64    0.51
  -2  -8  12    4.98    0.32
   2  -8 -11    0.38    0.23
   2   8 -11    0.44    0.17
   2  -8 -11    0.44    0.20
  -2  -8  11    0.64    0.23
  -2  -8  11    0.30    0.13
   2   8 -10   43.02    1.91
   2  -8 -10   49.97    2.24
  -2  -8  10   48.30    2.20
  -2  -8  10   42.44    1.76
  -2   8  10   44.84    2.39
   2   8  -9    4.17    0.35
   2  -8  -9    5.25    0.48
   2  -8  -9    4.23    0.34
  -2  -8   9    4.23    0.31
  -2  -8   9    3.85    0.30
  -2  -8   9    4.78    0.47
  -2   8   9    5.19    0.46
   2  -8  -8    7.97    0.49
   2  -8  -8    7.55    0.45
  -2  -8   8    7.30    0.70
  -2  -8   8    8.89    0.64
  -2  -8   8    7.12    0.82
  -2  -8   8    8.03    0.49
  -2  -8   8    6.92    0.37
  -2   8   8    6.76    0.69
   2  -8  -7    2.41    0.13
   2  -8  -7    2.48    0.25
   2  -8  -7    2.48    0.39
   2  -8  -7    2.97    0.28
  -2  -8   7    2.99    0.37
  -2  -8   7    2.55    0.45
  -2  -8   7    2.04    0.19
  -2  -8   7    3.46    0.25
  -2  -8   7    3.01    0.43
   2  -8  -6   14.36    0.91
   2  -8  -6   13.63    0.61
   2  -8  -6   14.03    0.46
   2  -8  -6   13.98    0.60
  -2  -8   6   14.20    0.72
  -2  -8   6   14.10    1.13
  -2  -8   6   14.79    0.74
  -2  -8   6   11.90    0.45
  -2  -8   6   12.36    0.78
  -2  -8   6   14.73    0.78
   2  -8  -5   10.86    0.42
   2  -8  -5   10.87    0.41
   2  -8  -5   12.81    0.78
   2  -8  -5    9.94    0.38
  -2  -8   5   10.52    0.55
  -2  -8   5    9.78    0.64
  -2  -8   5    9.76    0.95
  -2  -8   5   10.27    0.58
  -2  -8   5   10.70    0.56
   2  -8  -4   11.63    0.43
   2  -8  -4   10.91    0.75
   2  -8  -4   10.73    0.37
   2  -8  -4   10.90    0.48
  -2  -8   4   10.36    0.54
  -2  -8   4   11.72    0.93
  -2  -8   4   10.49    0.57
  -2  -8   4    9.75    0.49
  -2  -8   4   10.61    0.62
   2  -8  -3   90.48    4.45
   2  -8  -3   92.86    3.59
   2  -8  -3   96.90    3.83
   2  -8  -3   94.02    3.90
  -2  -8   3   97.56    4.15
  -2  -8   3   95.71    5.06
  -2  -8   3   96.77    4.34
  -2  -8   3   95.66    3.89
  -2  -8   3   93.25    4.06
   2  -8  -2    0.54    0.11
   2  -8  -2    0.56    0.11
   2  -8  -2    0.50    0.10
   2  -8  -2    0.82    0.25
  -2  -8   2    0.56    0.28
  -2  -8   2    0.49    0.14
  -2  -8   2    0.54    0.16
  -2  -8   2    0.68    0.17
   2  -8  -1   67.43    3.37
   2  -8  -1   69.35    2.52
   2  -8  -1   69.91    2.75
   2  -8  -1   69.94    2.62
   2  -8  -1   69.20    2.62
  -2  -8   1   71.09    2.71
  -2  -8   1   67.37    3.10
  -2  -8   1   72.47    2.93
  -2  -8   1   73.50    2.72
   2  -8   0    2.66    0.20
   2  -8   0    2.62    0.21
   2  -8   0    2.62    0.42
   2  -8   0    2.91    0.23
   2  -8   0    2.60    0.18
  -2  -8   0    2.74    0.20
  -2  -8   0    3.01    0.41
  -2  -8   0    3.00    0.24
  -2  -8   0    2.98    0.23
   2  -8   1   19.54    0.64
   2  -8   1   18.97    0.77
   2  -8   1   18.88    0.61
   2  -8   1   19.60    0.68
   2  -8   1   19.57    0.77
   2  -8   1   19.47    1.15
  -2  -8  -1   20.45    1.09
  -2  -8  -1   19.98    0.72
  -2  -8  -1   20.99    0.66
  -2  -8  -1   20.30    0.78
   2  -8   2    1.94    0.20
   2  -8   2    2.17    0.22
   2  -8   2    2.21    0.24
   2  -8   2    1.79    0.43
   2  -8   2    2.00    0.29
  -2  -8  -2    2.22    0.21
  -2  -8  -2    2.43    0.18
  -2  -8  -2    2.02    0.33
  -2  -8  -2    2.15    0.32
  -2  -8  -2    2.38    0.18
   2  -8   3   13.64    0.63
   2  -8   3   11.68    1.04
   2  -8   3   13.24    0.65
   2  -8   3   13.57    0.48
   2  -8   3   13.67    0.59
  -2  -8  -3   13.43    0.78
  -2  -8  -3   13.41    0.53
  -2  -8  -3   13.97    0.52
  -2  -8  -3   13.06    0.36
  -2  -8  -3   13.40    0.88
  -2  -8  -3   13.69    0.49
  -2  -8  -3   13.42    0.49
   2  -8   4   13.20    1.02
   2   8   4   11.59    0.56
   2  -8   4   12.15    0.67
   2  -8   4   11.95    0.55
   2  -8   4   12.51    0.50
  -2  -8  -4   10.90    0.90
  -2  -8  -4   12.05    0.56
  -2  -8  -4   12.20    0.35
  -2  -8  -4   12.02    0.47
   2   8   5   17.56    0.83
   2  -8   5   18.35    0.73
   2  -8   5   18.50    0.94
   2  -8   5   18.50    0.96
   2  -8   5   17.37    1.14
   2  -8   5   18.01    0.64
  -2   8  -5   16.86    1.00
  -2  -8  -5   17.45    1.13
  -2  -8  -5   18.45    0.75
  -2  -8  -5   18.28    0.61
  -2   8  -5   17.30    0.83
  -2  -8  -5   18.41    0.67
   2  -8   6   40.40    2.01
   2  -8   6   44.38    1.95
   2  -8   6   42.23    1.60
   2   8   6   37.92    1.73
   2  -8   6   41.51    2.57
  -2   8  -6   40.18    1.80
  -2  -8  -6   44.20    2.04
  -2   8  -6   41.04    2.17
  -2  -8  -6   42.74    1.53
   2  -8   7   24.28    1.16
   2  -8   7   23.15    1.72
   2   8   7   21.94    1.12
   2  -8   7   23.41    0.82
   2  -8   7   17.82    1.20
  -2  -8  -7   22.86    0.86
  -2  -8  -7   24.37    1.30
  -2   8  -7   22.01    1.14
  -2   8  -7   23.95    1.65
   2  -8   8   14.30    1.35
   2  -8   8   13.42    0.76
   2  -8   8   10.34    0.83
  -2  -8  -8   13.56    0.87
  -2  -8  -8   13.94    0.66
  -2   8  -8   14.25    1.21
  -2   8  -8   12.89    0.83
   2  -8   9   10.34    0.68
   2  -8   9    9.77    0.59
  -2   8  -9   10.05    0.57
  -2  -8  -9    8.99    0.73
  -2  -8  -9   10.69    0.55
   2  -8  10    0.81    0.25
   2  -8  10    0.80    0.21
  -2  -8 -10    0.91    0.25
  -2  -8 -10    0.62    0.14
  -2   8 -10    0.73    0.24
   2  -8  11    9.71    0.47
   2  -8  11   10.03    0.61
   2   8  11    9.10    0.37
  -2  -8 -11    9.08    0.65
  -2   8 -11    9.63    0.63
   2  -8  12   -0.00    0.10
   2  -8  12   -0.02    0.08
  -2  -8 -12    0.07    0.12
  -2   8 -12    0.15    0.12
   2  -9 -14    3.67    0.25
  -2  -9  14    4.08    0.28
   2  -9 -13    2.12    0.32
   2  -9 -13    2.03    0.30
  -2  -9  13    2.30    0.23
   2  -9 -12    0.02    0.10
   2  -9 -12   -0.02    0.12
  -2  -9  12    0.08    0.10
   2  -9 -11    3.63    0.43
   2  -9 -11    3.85    0.31
  -2  -9  11    4.17    0.41
   2  -9 -10    6.25    0.47
   2  -9 -10    5.82    0.40
  -2  -9  10    5.39    0.32
  -2  -9  10    6.18    0.62
   2  -9  -9   11.49    0.68
   2  -9  -9   10.04    0.65
  -2   9   9   10.73    0.88
  -2  -9   9   11.11    0.70
  -2  -9   9    8.95    0.47
  -2  -9   9   10.73    0.54
   2  -9  -8   61.94    2.67
  -2  -9   8   62.03    3.63
  -2  -9   8   61.45    3.01
  -2  -9   8   56.47    2.26
  -2   9   8   56.85    2.99
  -2  -9   8   61.95    2.72
   2  -9  -7   22.11    0.94
   2  -9  -7   20.90    0.81
   2  -9  -7   20.58    0.64
   2  -9  -7   21.39    1.04
  -2  -9   7   19.77    1.14
  -2  -9   7   20.72    1.02
  -2  -9   7   20.68    1.54
   2  -9  -6    1.73    0.16
   2  -9  -6    1.69    0.31
   2  -9  -6    1.74    0.19
   2  -9  -6    1.80    0.25
  -2  -9   6    2.09    0.25
  -2  -9   6    1.78    0.31
  -2  -9   6    1.68    0.31
  -2  -9   6    1.86    0.40
   2  -9  -5    0.95    0.23
   2  -9  -5    0.73    0.13
   2  -9  -5    0.79    0.17
  -2  -9   5    0.96    0.37
  -2  -9   5    0.70    0.22
  -2  -9   5    0.67    0.20
  -2  -9   5    0.86    0.23
  -2  -9   5    0.60    0.27
   2  -9  -4   20.97    0.85
   2  -9  -4   20.98    1.05
   2  -9  -4   23.13    0.76
   2  -9  -4   21.20    0.71
  -2  -9   4   22.40    1.06
  -2  -9   4   21.93    0.78
  -2  -9   4   22.82    0.98
  -2  -9   4   22.36    1.49
  -2  -9   4   21.93    1.10
   2  -9  -3   13.48    0.53
   2  -9  -3   13.08    0.54
   2  -9  -3   13.30    0.78
   2  -9  -3   13.34    0.50
  -2  -9   3   13.49    0.71
  -2  -9   3   13.64    0.74
  -2  -9   3   13.46    1.06
  -2  -9   3   13.08    0.50
  -2  -9   3   13.28    0.65
   2  -9  -2   13.75    0.55
   2  -9  -2   13.28    0.60
   2  -9  -2   13.59    0.81
   2  -9  -2   14.75    0.58
  -2  -9   2   14.02    0.65
  -2  -9   2   14.61    0.71
  -2  -9   2   13.98    0.87
  -2  -9   2   14.16    0.64
   2  -9  -1    1.64    0.21
   2  -9  -1    1.62    0.21
   2  -9  -1    1.08    0.31
   2  -9  -1    1.52    0.23
   2  -9  -1    1.36    0.14
  -2  -9   1    1.43    0.21
  -2  -9   1    1.52    0.20
  -2  -9   1    1.44    0.41
  -2  -9   1    1.59    0.25
   2  -9   0   92.73    3.80
   2  -9   0   86.62    4.59
   2  -9   0   87.62    3.77
   2  -9   0   92.11    4.03
   2  -9   0   92.95    3.95
  -2  -9   0   92.57    3.99
  -2  -9   0   95.90    4.06
  -2  -9   0  105.60    4.50
  -2  -9   0   92.41    4.82
   2  -9   1   17.06    0.64
   2  -9   1   17.65    0.67
   2  -9   1   17.58    1.03
   2  -9   1   17.70    0.73
   2  -9   1   16.80    0.71
  -2  -9  -1   17.49    0.91
  -2  -9  -1   17.45    0.73
  -2  -9  -1   19.89    0.74
  -2  -9  -1   18.00    0.67
   2  -9   2    1.80    0.22
   2  -9   2    1.75    0.22
   2  -9   2    2.14    0.44
   2  -9   2    2.05    0.24
   2  -9   2    2.02    0.22
  -2  -9  -2    1.38    0.20
  -2  -9  -2    1.75    0.36
  -2  -9  -2    1.63    0.19
  -2  -9  -2    2.06    0.19
   2  -9   3    0.54    0.18
   2  -9   3    0.38    0.31
   2  -9   3    0.38    0.17
   2  -9   3    0.49    0.12
   2  -9   3    0.42    0.13
  -2  -9  -3    0.28    0.10
  -2  -9  -3    0.37    0.20
  -2  -9  -3    0.33    0.12
   2  -9   4   11.14    0.54
   2   9   4   10.04    0.56
   2  -9   4    9.90    0.86
   2  -9   4   10.48    0.60
   2  -9   4   12.27    0.59
   2  -9   4   10.92    0.59
  -2  -9  -4   10.91    0.45
  -2  -9  -4   11.01    0.36
  -2  -9  -4   10.92    0.73
  -2  -9  -4   10.37    0.50
   2   9   5    9.79    0.59
   2  -9   5   11.36    0.76
   2  -9   5    9.87    0.47
   2  -9   5    9.65    1.16
   2  -9   5   10.75    0.52
   2  -9   5   11.21    0.79
  -2  -9  -5   10.58    0.38
  -2  -9  -5   10.41    0.52
  -2   9  -5   10.20    0.78
   2  -9   6   76.52    3.85
   2  -9   6   72.41    4.51
   2  -9   6   79.33    4.02
   2  -9   6   76.65    3.36
   2  -9   6   76.16    3.07
  -2  -9  -6   76.87    3.11
  -2  -9  -6   74.90    3.55
  -2   9  -6   77.89    4.44
   2  -9   7    5.64    0.58
   2  -9   7    5.10    0.89
   2  -9   7    5.23    0.32
   2  -9   7    6.51    0.63
  -2  -9  -7    5.95    0.34
  -2  -9  -7    5.97    0.54
  -2   9  -7    5.33    0.68
   2  -9   8   18.75    1.05
   2  -9   8   17.75    0.88
  -2  -9  -8   18.80    0.75
  -2  -9  -8   18.26    0.99
  -2   9  -8   16.73    0.91
   2  -9   9    0.75    0.23
   2  -9   9    0.79    0.22
  -2  -9  -9    0.53    0.15
  -2  -9  -9    0.77    0.23
  -2   9  -9    0.53    0.21
   2  -9  10    0.06    0.12
   2  -9  10   -0.04    0.11
  -2   9 -10    0.07    0.11
  -2  -9 -10    0.02    0.13
   2  -9  11    1.34    0.17
   2  -9  11    1.14    0.24
  -2  -9 -11    1.50    0.28
   2  -9  12    2.71    0.18
   2  -9  12    3.08    0.24
  -2  -9 -12    3.00    0.25
   2 -10 -13    0.19    0.13
   2 -10 -13    0.25    0.14
  -2 -10  13    0.58    0.14
   2 -10 -12    2.44    0.23
   2 -10 -12    2.76    0.31
  -2 -10  12    2.67    0.29
   2 -10 -11    0.11    0.13
   2 -10 -11    0.14    0.13
  -2 -10  11    0.17    0.14
   2 -10 -10    0.46    0.19
   2 -10 -10    0.66    0.19
  -2 -10  10    0.86    0.25
   2 -10  -9   31.53    1.36
   2 -10  -9   31.84    1.41
  -2 -10   9   31.11    1.25
  -2 -10   9   32.21    1.70
   2 -10  -8   17.27    0.79
   2 -10  -8   16.34    0.71
  -2 -10   8   14.88    1.41
  -2  10   8   14.88    0.91
  -2 -10   8   16.14    0.82
  -2 -10   8   18.29    1.05
   2 -10  -7    2.47    0.34
   2 -10  -7    2.59    0.30
   2 -10  -7    2.83    0.16
  -2 -10   7    2.07    0.63
  -2 -10   7    2.56    0.39
  -2 -10   7    2.55    0.35
   2 -10  -6    5.92    0.41
   2 -10  -6    6.30    0.31
   2 -10  -6    5.89    0.60
  -2 -10   6    5.57    0.89
  -2 -10   6    6.29    0.47
  -2 -10   6    6.65    0.42
  -2 -10   6    6.15    0.56
   2 -10  -5   42.39    2.01
   2 -10  -5   43.91    1.87
   2 -10  -5   44.30    1.58
  -2 -10   5   43.28    1.89
  -2 -10   5   43.70    2.43
  -2 -10   5   44.14    1.93
  -2 -10   5   47.15    2.12
   2 -10  -4   25.63    0.83
   2 -10  -4   26.81    1.15
   2 -10  -4   28.58    1.56
   2 -10  -4   26.77    1.07
  -2 -10   4   27.41    1.27
  -2 -10   4   26.28    1.03
  -2 -10   4   26.27    1.86
  -2 -10   4   26.37    1.32
   2 -10  -3   51.80    1.98
   2 -10  -3   52.02    2.08
   2 -10  -3   52.42    1.97
   2 -10  -3   50.74    2.55
  -2 -10   3   54.07    2.32
  -2 -10   3   42.09    2.45
  -2 -10   3   54.06    2.24
   2 -10  -2   35.89    1.34
   2 -10  -2   31.37    1.81
   2 -10  -2   34.69    1.40
   2 -10  -2   35.63    1.49
  -2 -10   2   33.36    1.57
  -2 -10   2   33.53    2.07
  -2 -10   2   35.38    1.33
   2 -10  -1    3.81    0.30
   2 -10  -1    2.80    0.32
   2 -10  -1    3.62    0.23
   2 -10  -1    2.55    0.53
  -2 -10   1    2.47    0.53
  -2 -10   1    2.50    0.29
  -2 -10   1    2.69    0.34
   2 -10   0    9.03    0.39
   2 -10   0    8.78    0.57
   2 -10   0    9.47    0.46
   2 -10   0    9.54    0.43
   2 -10   0    9.37    0.88
  -2 -10   0    6.68    0.54
  -2 -10   0    8.91    0.46
  -2 -10   0    9.78    0.83
   2 -10   1    3.34    0.31
   2 -10   1    3.26    0.28
   2 -10   1    3.09    0.26
   2 -10   1    3.20    0.32
   2 -10   1    2.76    0.46
  -2 -10  -1    2.88    0.31
  -2 -10  -1    3.06    0.53
  -2 -10  -1    3.25    0.26
   2 -10   2    9.31    0.58
   2 -10   2    9.25    0.48
   2 -10   2    9.90    0.53
   2 -10   2    8.92    0.64
   2 -10   2    9.37    0.97
  -2 -10  -2    9.32    0.50
  -2 -10  -2   11.54    0.82
  -2 -10  -2   10.44    0.46
   2 -10   3  107.99    4.90
   2 -10   3  103.11    5.20
   2 -10   3  107.16    4.86
   2 -10   3  100.62    5.99
   2 -10   3  109.37    4.88
  -2 -10  -3  105.67    4.60
  -2 -10  -3  108.62    4.76
   2 -10   4    1.50    0.36
   2 -10   4    1.59    0.33
   2 -10   4    1.66    0.30
   2 -10   4    1.67    0.27
   2 -10   4    1.27    0.55
  -2  10  -4    1.27    0.43
   2 -10   5   35.59    1.81
   2 -10   5   33.21    2.33
   2 -10   5   35.55    1.79
   2 -10   5   35.96    1.43
   2 -10   5   36.13    1.43
  -2 -10  -5   34.40    1.46
  -2  10  -5   34.50    2.14
   2 -10   6   41.00    1.48
   2 -10   6   38.77    1.77
   2 -10   6   40.02    2.01
   2 -10   6   36.04    2.33
   2 -10   6   39.25    1.60
  -2 -10  -6   39.06    1.75
  -2  10  -6   39.44    2.51
   2 -10   7    0.20    0.20
   2 -10   7    0.12    0.10
   2 -10   7    0.34    0.19
  -2 -10  -7    0.23    0.15
   2 -10   8    3.29    0.19
   2 -10   8    3.19    0.34
   2 -10   8    4.45    0.36
  -2 -10  -8    3.22    0.36
   2 -10   9    0.02    0.08
   2 -10   9    0.07    0.10
  -2 -10  -9   -0.08    0.08
   2 -10  10    2.45    0.27
   2 -10  10    2.05    0.28
  -2 -10 -10    1.87    0.29
   2 -10  11    1.41    0.19
   2 -10  11    1.36    0.15
  -2 -10 -11    0.78    0.21
   2 -11 -12    1.29    0.19
  -2 -11  12    1.19    0.22
   2 -11 -11    1.53    0.23
   2 -11 -11    2.05    0.26
  -2 -11  11    2.71    0.33
  -2 -11  11    2.27    0.16
   2 -11 -10    0.08    0.11
  -2 -11  10    0.04    0.15
   2 -11  -9    0.03    0.10
  -2 -11   9    0.19    0.12
  -2 -11   9   -0.00    0.09
   2 -11  -8    0.38    0.12
  -2 -11   8    0.59    0.22
  -2 -11   8    0.50    0.16
   2 -11  -7    0.33    0.08
   2 -11  -7    0.38    0.15
  -2 -11   7    0.36    0.37
  -2 -11   7    0.57    0.17
  -2 -11   7    0.58    0.20
   2 -11  -6    5.65    0.34
   2 -11  -6    5.98    0.50
   2 -11  -6    5.19    0.28
  -2 -11   6    5.22    0.87
  -2 -11   6    5.65    0.45
  -2 -11   6    5.18    0.52
   2 -11  -5   88.21    3.93
   2 -11  -5   85.31    4.50
   2 -11  -5   90.79    3.71
  -2 -11   5   87.55    4.18
  -2 -11   5   88.13    4.39
  -2 -11   5   84.30    3.84
  -2 -11   5   83.19    5.07
   2 -11  -4    0.84    0.17
   2 -11  -4    0.62    0.18
   2 -11  -4    0.54    0.29
   2 -11  -4    0.43    0.10
  -2 -11   4    0.85    0.23
  -2 -11   4    0.46    0.15
  -2 -11   4    0.44    0.32
  -2 -11   4    0.60    0.20
   2 -11  -3    4.55    0.63
   2 -11  -3    5.04    0.31
   2 -11  -3    5.21    0.38
   2 -11  -3    5.21    0.40
  -2 -11   3    4.13    0.79
  -2 -11   3    5.90    0.52
  -2 -11   3    5.61    0.36
   2 -11  -2    0.10    0.14
   2 -11  -2    0.19    0.25
   2 -11  -2    0.19    0.12
   2 -11  -2    0.16    0.13
  -2 -11   2    0.24    0.14
  -2 -11   2    0.18    0.28
  -2 -11   2    0.21    0.17
   2 -11  -1    0.64    0.19
   2 -11  -1    0.87    0.18
   2 -11  -1    0.61    0.20
   2 -11  -1    0.79    0.35
  -2 -11   1    0.82    0.23
  -2 -11   1    0.52    0.17
  -2 -11   1    0.42    0.37
   2 -11   0    9.61    0.58
   2 -11   0   10.66    0.60
   2 -11   0    9.88    0.82
   2 -11   0    9.59    0.58
  -2 -11   0   10.16    0.49
  -2 -11   0    9.15    0.62
  -2 -11   0    9.75    0.97
   2 -11   1   17.67    0.70
   2 -11   1   19.42    1.45
   2 -11   1   17.07    0.89
   2 -11   1   17.32    0.89
   2 -11   1   19.92    0.98
  -2 -11  -1   17.72    0.74
  -2 -11  -1   17.26    1.33
  -2 -11  -1   17.05    0.85
   2 -11   2    3.32    0.30
   2 -11   2    2.88    0.39
   2 -11   2    2.66    0.38
   2 -11   2    3.49    0.53
   2 -11   2    3.18    0.33
  -2 -11  -2    2.67    0.42
  -2 -11  -2    2.55    0.24
  -2 -11  -2    2.50    0.29
   2 -11   3   52.74    3.45
   2 -11   3   60.45    2.50
   2 -11   3   61.46    2.62
   2 -11   3   63.23    2.99
  -2 -11  -3   57.12    2.29
  -2  11  -3   56.82    3.16
   2 -11   4    0.83    0.20
   2 -11   4    1.06    0.23
   2 -11   4    0.77    0.27
   2 -11   4    0.74    0.48
   2 -11   4    0.91    0.21
  -2  11  -4    0.66    0.31
   2 -11   5   35.15    1.56
   2 -11   5   38.20    1.64
   2 -11   5   37.94    1.81
   2 -11   5   35.29    1.39
   2 -11   5   33.02    2.15
  -2  11  -5   35.55    2.33
   2 -11   6    0.22    0.20
   2 -11   6    0.30    0.14
   2 -11   6    0.30    0.18
   2 -11   6    0.39    0.10
   2 -11   7   34.29    1.50
   2 -11   7   35.88    1.24
   2 -11   7   36.84    1.80
  -2 -11  -7   34.41    1.49
   2 -11   8    0.35    0.08
   2 -11   8    0.41    0.21
   2 -11   8    0.44    0.15
  -2 -11  -8    0.38    0.16
   2 -11   9    0.37    0.17
   2 -11   9    0.26    0.15
  -2 -11  -9    0.23    0.14
   2 -11  10    0.04    0.12
   2 -11  10    0.02    0.14
  -2 -11 -10    0.55    0.10
   2 -12 -11    3.22    0.25
  -2 -12  11    2.62    0.29
   2 -12 -10    1.28    0.19
  -2 -12  10    1.60    0.20
  -2 -12  10    1.22    0.12
   2 -12  -9    0.12    0.11
  -2 -12   9    0.11    0.08
  -2 -12   9    0.14    0.14
   2 -12  -8    1.80    0.21
  -2 -12   8    1.56    0.30
  -2 -12   8    1.62    0.22
   2 -12  -7    2.80    0.28
  -2 -12   7    3.16    0.35
  -2 -12   7    3.23    0.25
   2 -12  -6    2.57    0.19
   2 -12  -6    2.45    0.20
  -2 -12   6    2.41    0.31
  -2 -12   6    3.44    0.27
   2 -12  -5    0.80    0.14
   2 -12  -5    0.38    0.30
   2 -12  -5    0.73    0.15
  -2 -12   5    0.59    0.16
  -2 -12   5    0.92    0.24
  -2 -12   5    0.74    0.45
   2 -12  -4   15.18    1.13
   2 -12  -4   15.80    0.64
   2 -12  -4   14.86    0.69
  -2 -12   4   15.94    0.95
  -2 -12   4   15.59    0.81
  -2 -12   4   15.43    1.48
   2 -12  -3    1.35    0.23
   2 -12  -3    1.44    0.14
   2 -12  -3    1.09    0.34
   2 -12  -3    1.40    0.22
  -2 -12   3    1.57    0.25
  -2 -12   3    1.16    0.31
  -2 -12   3    1.06    0.50
   2 -12  -2    3.85    0.31
   2 -12  -2    3.75    0.59
   2 -12  -2    3.85    0.35
   2 -12  -2    4.09    0.37
  -2 -12   2    4.37    0.44
  -2 -12   2    1.65    0.70
  -2 -12   2    3.71    0.35
   2 -12  -1    2.50    0.23
   2 -12  -1    1.78    0.51
   2 -12  -1    1.98    0.29
   2 -12  -1    1.94    0.25
  -2 -12   1    2.23    0.25
  -2 -12   1    1.44    0.55
  -2 -12   1    2.05    0.31
   2 -12   0    0.81    0.21
   2 -12   0    0.51    0.18
   2 -12   0    0.91    0.20
   2 -12   0    0.47    0.40
  -2 -12   0    0.69    0.22
  -2 -12   0    0.50    0.40
  -2 -12   0    0.76    0.16
   2 -12   1   18.20    0.78
   2 -12   1   16.86    1.41
   2 -12   1   17.78    0.87
   2 -12   1   17.94    0.90
  -2 -12  -1   17.61    0.71
  -2 -12  -1   16.07    1.08
  -2 -12  -1   17.14    0.84
  -2 -12  -1   16.10    0.64
   2 -12   2    6.42    0.41
   2 -12   2    7.95    0.95
   2 -12   2    6.67    0.45
   2 -12   2    6.84    0.40
   2 -12   2    6.78    0.42
  -2 -12  -2    6.33    0.40
   2 -12   3   19.88    0.95
   2 -12   3   20.37    0.90
   2 -12   3   17.55    0.97
   2 -12   3   19.26    1.66
   2 -12   3   19.02    0.88
  -2 -12  -3   17.30    0.70
   2 -12   4    0.79    0.23
   2 -12   4    1.03    0.23
   2 -12   4    0.97    0.17
   2 -12   4    0.86    0.22
   2 -12   5    2.86    0.29
   2 -12   5    3.05    0.35
   2 -12   5    3.10    0.19
   2 -12   5    2.79    0.37
   2 -12   6    3.72    0.20
   2 -12   6    3.41    0.40
   2 -12   6    3.00    0.37
   2 -12   6    3.41    0.27
   2 -12   7   14.45    0.77
   2 -12   7   15.87    0.75
   2 -12   7   15.45    0.51
   2 -12   8    0.19    0.13
   2 -12   8    0.13    0.15
   2 -12   9    7.49    0.39
   2 -12   9    6.55    0.37
   2 -12  10    0.51    0.11
   2 -13 -10    0.99    0.13
  -2 -13  10    0.76    0.17
  -2 -13  10    0.77    0.11
   2 -13  -9    1.14    0.15
  -2 -13   9    1.06    0.20
  -2 -13   9    1.24    0.15
  -2 -13   9    1.13    0.12
   2 -13  -8   -0.02    0.08
  -2 -13   8    0.10    0.08
  -2 -13   8    0.17    0.10
  -2 -13   8    0.07    0.10
   2 -13  -7    1.03    0.14
  -2 -13   7    0.95    0.19
  -2 -13   7    1.38    0.16
   2 -13  -6    5.47    0.25
   2 -13  -6    5.84    0.33
  -2 -13   6    5.67    0.44
   2 -13  -5    2.51    0.24
   2 -13  -5    2.40    0.17
  -2 -13   5    2.44    0.33
   2 -13  -4   33.43    1.36
   2 -13  -4   31.13    1.14
  -2 -13   4   34.71    1.58
   2 -13  -3   11.85    0.53
   2 -13  -3   11.94    0.59
  -2 -13   3   12.41    0.68
  -2 -13   3   11.89    0.55
   2 -13  -2    0.27    0.15
   2 -13  -2    0.30    0.12
   2 -13  -2    0.46    0.13
  -2 -13   2    0.24    0.14
  -2 -13   2    0.37    0.21
   2 -13  -1    1.59    0.24
   2 -13  -1    1.55    0.18
   2 -13  -1    1.71    0.26
  -2 -13   1    1.69    0.22
  -2 -13   1    1.45    0.23
  -2 -13   1    1.56    0.24
   2 -13   0   13.66    0.63
   2 -13   0   14.20    0.70
   2 -13   0   13.42    0.68
  -2 -13   0   13.28    0.57
  -2 -13   0   12.42    0.56
  -2 -13   0   13.91    0.73
   2 -13   1    3.14    0.28
   2 -13   1    4.20    0.36
   2 -13   1    3.62    0.27
  -2 -13  -1    3.18    0.23
  -2 -13  -1    3.73    0.34
   2 -13   2    4.62    0.31
   2 -13   2    4.77    0.31
   2 -13   2    4.70    0.34
  -2 -13  -2    4.74    0.32
   2 -13   3    2.93    0.29
   2 -13   3    3.03    0.27
   2 -13   3    3.04    0.25
   2 -13   3    3.48    0.28
  -2 -13  -3    3.08    0.21
   2 -13   4    6.52    0.42
   2 -13   4    6.00    0.39
   2 -13   4    5.27    0.47
   2 -13   4    5.84    0.33
   2 -13   5    0.75    0.17
   2 -13   5    0.63    0.20
   2 -13   5    0.81    0.13
   2 -13   5    0.99    0.13
   2 -13   6    1.23    0.22
   2 -13   6    1.11    0.21
   2 -13   6    1.28    0.15
   2 -13   6    0.97    0.10
   2 -13   7    0.20    0.13
   2 -13   7    0.10    0.06
   2 -13   7    0.13    0.10
   2 -13   8    0.15    0.09
   2 -13   8    0.11    0.09
  -2 -14   9    1.27    0.13
  -2 -14   8    0.03    0.06
  -2 -14   8    0.08    0.06
   2 -14  -7    0.08    0.07
  -2 -14   7    0.07    0.09
  -2 -14   7    0.11    0.10
   2 -14  -6    1.11    0.11
   2 -14  -6    1.56    0.16
  -2 -14   6    1.86    0.19
  -2 -14   6    1.62    0.22
   2 -14  -5    5.46    0.29
   2 -14  -5    5.36    0.29
  -2 -14   5    5.84    0.36
  -2 -14   5    5.53    0.43
   2 -14  -4    9.89    0.46
   2 -14  -4   10.42    0.49
  -2 -14   4    9.72    0.50
  -2 -14   4   10.12    0.61
   2 -14  -3    0.23    0.12
   2 -14  -3    0.25    0.11
  -2 -14   3    0.15    0.12
  -2 -14   3    0.29    0.14
   2 -14  -2   14.52    0.60
   2 -14  -2   14.41    0.59
  -2 -14   2   13.86    0.59
  -2 -14   2   13.71    0.67
   2 -14  -1    1.58    0.21
   2 -14  -1    1.78    0.23
   2 -14  -1    1.32    0.19
  -2 -14   1    2.02    0.25
  -2 -14   1    1.15    0.21
   2 -14   0    1.45    0.18
   2 -14   0    1.32    0.23
   2 -14   0    1.65    0.18
  -2 -14   0    1.69    0.17
  -2 -14   0    1.51    0.25
   2 -14   1    2.82    0.29
   2 -14   1    3.35    0.30
   2 -14   1    3.45    0.28
  -2 -14  -1    2.72    0.29
   2 -14   2    0.60    0.13
   2 -14   2    0.60    0.17
   2 -14   2    0.67    0.15
  -2 -14  -2    0.60    0.14
   2 -14   3    0.09    0.10
   2 -14   3    0.20    0.12
   2 -14   3    0.15    0.11
   2 -14   4    8.71    0.42
   2 -14   4    8.37    0.37
   2 -14   4    7.47    0.42
   2 -14   5    0.20    0.10
   2 -14   5    0.15    0.08
   2 -14   5    0.19    0.08
   2 -14   5    0.16    0.07
   2 -14   6    0.26    0.12
   2 -14   6    0.30    0.10
   2 -14   6    0.38    0.07
  -2 -15   7    0.08    0.07
  -2 -15   7    0.06    0.06
  -2 -15   6    0.89    0.17
  -2 -15   6    1.35    0.15
   2 -15  -5    0.26    0.07
   2 -15  -5    0.46    0.08
  -2 -15   5    0.30    0.13
  -2 -15   5    0.28    0.12
   2 -15  -4    3.42    0.19
   2 -15  -4    3.82    0.23
  -2 -15   4    4.06    0.30
  -2 -15   4    3.68    0.25
   2 -15  -3    0.73    0.14
   2 -15  -3    0.69    0.11
  -2 -15   3    0.88    0.19
  -2 -15   3    0.69    0.16
   2 -15  -2    9.40    0.39
  -2 -15   2    9.33    0.56
  -2 -15   2    9.88    0.47
   2 -15  -1    5.83    0.37
  -2 -15   1    5.27    0.24
  -2 -15   1    5.36    0.33
   2 -15   0    0.94    0.13
   2 -15   0    1.02    0.13
  -2 -15   0    0.79    0.13
  -2 -15   0    0.56    0.11
   2 -15   1    2.62    0.22
   2 -15   1    2.47    0.19
   2 -15   1    2.60    0.21
  -2 -15  -1    2.01    0.16
   2 -15   2    2.59    0.21
   2 -15   2    2.37    0.14
   2 -15   2    2.43    0.18
  -2 -15  -2    2.42    0.16
   2 -15   3    1.46    0.12
   2 -15   3    1.13    0.14
   2 -15   3    1.64    0.13
   2 -15   4    2.65    0.15
   2 -15   4    2.70    0.15
   2 -15   4    2.38    0.17
  -2 -16   5    1.20    0.10
  -2 -16   5    0.57    0.10
  -2 -16   4    0.89    0.12
  -2 -16   4    0.74    0.13
   2 -16  -3    2.40    0.15
  -2 -16   3    1.86    0.23
  -2 -16   3    2.38    0.14
   2 -16  -2    4.14    0.20
  -2 -16   2    3.50    0.21
  -2 -16   2    4.37    0.29
   2 -16  -1    0.49    0.11
  -2 -16   1    0.53    0.12
   2 -16   0    1.55    0.16
  -2 -16   0    1.15    0.14
   2 -16   1    0.24    0.09
   2 -16   2    0.58    0.09
   3   0 -16    0.28    0.17
  -3   0  16    0.67    0.15
   3   0 -15   -0.06    0.08
   3   0 -15    0.16    0.12
  -3   0  15    0.00    0.09
   3   0 -14    0.22    0.16
   3   0 -14    0.14    0.13
  -3   0  14    0.14    0.14
   3   0 -13    0.05    0.19
   3   0 -13    0.21    0.11
  -3   0  13    0.02    0.24
  -3   0  13    0.05    0.15
   3   0 -12    3.08    0.64
   3   0 -12    4.48    0.48
   3   0 -12    3.37    0.37
  -3   0  12    2.89    0.31
  -3   0  12    3.14    0.51
   3   0 -11    0.45    0.16
   3   0 -11    0.28    0.15
   3   0 -11    0.27    0.18
   3   0 -11    0.15    0.28
  -3   0  11    0.12    0.22
  -3   0  11    0.28    0.15
   3   0 -10    0.50    0.16
   3   0 -10    0.51    0.14
   3   0 -10    0.40    0.16
   3   0 -10    0.46    0.28
  -3   0  10    0.48    0.20
  -3   0  10    0.47    0.15
   3   0  -9    0.12    0.11
   3   0  -9    0.09    0.10
   3   0  -9    0.08    0.13
   3   0  -9    0.54    0.13
   3   0  -9    0.28    0.24
  -3   0   9   -0.02    0.12
  -3   0   9    0.07    0.12
  -3   0   9    0.25    0.11
   3   0  -8   26.64    1.57
   3   0  -8   26.27    1.03
   3   0  -8   22.94    0.79
   3   0  -8   25.45    0.92
   3   0  -8   27.23    1.06
  -3   0   8   27.71    1.18
  -3   0   8   27.00    0.96
  -3   0   8   25.77    0.96
   3   0  -7    0.62    0.11
   3   0  -7    0.60    0.08
  -3   0   7    0.60    0.15
  -3   0   7    0.78    0.17
  -3   0   6    2.71    0.23
  -3   0   6    3.14    0.24
  -3   0   5    0.98    0.16
  -3   0   5    1.36    0.16
   3   0  -4  233.35   12.42
  -3   0   4  218.32   11.39
   3   0  -3    7.11    0.41
  -3   0   3    5.75    0.26
   3   0  -2  289.11   15.52
  -3   0   2  279.68   15.58
   3   0  -1    0.96    0.08
  -3   0   1    1.72    0.15
   3   0   0   34.39    1.00
  -3   0   0   34.84    1.18
   3   0   1    0.39    0.08
  -3   0  -1    0.23    0.14
   3   0   2   66.15    2.36
  -3   0  -2   62.93    2.03
  -3   0  -2   64.74    2.55
   3   0   3    1.44    0.13
  -3   0  -3    0.66    0.27
   3   0   4    0.70    0.17
  -3   0  -4    0.97    0.26
   3   0   5    0.07    0.05
   3   0   5    0.08    0.10
  -3   0  -5    0.27    0.16
  -3   0  -5   -0.04    0.09
  -3   0  -5    0.06    0.07
   3   0   6    4.88    0.23
   3   0   6    5.69    0.37
  -3   0  -6    5.55    0.47
  -3   0  -6    5.67    0.37
  -3   0  -6    4.95    0.30
   3   0   7    0.05    0.06
   3   0   7    0.08    0.13
  -3   0  -7    0.02    0.18
  -3   0  -7    0.01    0.13
  -3   0  -7    0.01    0.09
   3   0   8    3.18    0.28
   3   0   8    3.38    0.45
  -3   0  -8    3.33    0.36
  -3   0  -8    3.61    0.60
  -3   0  -8    2.98    0.31
   3   0   9   -0.16    0.18
   3   0   9    0.14    0.11
  -3   0  -9   -0.04    0.11
  -3   0  -9   -0.04    0.24
  -3   0  -9    0.18    0.16
   3   0  10    6.91    0.83
   3   0  10    7.21    0.47
  -3   0 -10    3.36    0.85
  -3   0 -10    7.29    0.50
  -3   0 -10    8.63    0.72
   3   0  11   -0.02    0.10
  -3   0 -11    0.13    0.16
  -3   0 -11   -0.07    0.10
   3   0  12    0.39    0.15
  -3   0 -12    0.13    0.14
  -3   0 -12    0.27    0.19
   3   0  13    0.02    0.08
  -3   0 -13    0.08    0.14
   3   0  14    0.61    0.10
   3  -1 -16    1.28    0.17
   3   1 -16    0.75    0.26
   3  -1 -16    0.47    0.20
  -3   1  16    1.05    0.15
  -3  -1  16    1.10    0.15
   3   1 -15    2.51    0.40
   3  -1 -15    1.85    0.28
   3  -1 -15    2.25    0.38
  -3   1  15    2.92    0.24
  -3  -1  15    2.86    0.30
   3   1 -14    0.19    0.21
   3  -1 -14    0.21    0.16
   3   1 -14    0.18    0.12
   3  -1 -14    0.17    0.20
  -3   1  14    0.20    0.16
  -3  -1  14    0.24    0.15
   3   1 -13   10.13    0.60
   3  -1 -13   10.48    0.70
   3  -1 -13   10.96    0.67
   3   1 -13   10.79    0.89
  -3  -1  13   10.55    0.60
  -3  -1  13   11.23    0.98
  -3  -1  13   11.83    0.68
  -3   1  13   10.52    0.80
   3   1 -12    1.56    0.25
   3  -1 -12    1.19    0.49
   3  -1 -12    1.87    0.26
   3  -1 -12    1.46    0.35
   3  -1 -12    2.17    0.30
   3   1 -12    1.95    0.41
  -3  -1  12    1.31    0.40
  -3   1  12    1.14    0.41
  -3  -1  12    1.94    0.26
  -3  -1  12    1.71    0.23
   3  -1 -11    3.80    0.34
   3  -1 -11    4.48    0.62
   3  -1 -11    5.51    0.47
   3  -1 -11    4.39    0.47
   3   1 -11    5.32    0.50
   3   1 -11    3.67    0.35
   3   1 -11    4.33    0.74
  -3   1  11    3.88    0.50
  -3   1  11    4.52    0.30
  -3  -1  11    4.45    0.34
  -3  -1  11    3.82    0.50
   3   1 -10    9.32    0.93
   3  -1 -10    9.90    0.77
   3  -1 -10    9.22    0.54
   3  -1 -10    9.69    0.61
   3  -1 -10    9.72    0.47
   3   1 -10   10.92    0.68
   3   1 -10    8.80    0.55
   3   1 -10    9.96    0.49
   3   1 -10   10.13    0.57
  -3  -1  10    9.49    0.68
  -3   1  10   10.46    0.59
  -3  -1  10    9.08    0.56
  -3   1  10    8.88    0.43
   3   1  -9    3.52    0.31
   3   1  -9    4.39    0.28
   3  -1  -9    4.03    0.36
   3   1  -9    3.73    0.31
   3   1  -9    4.05    0.37
   3  -1  -9    5.79    0.50
   3  -1  -9    3.94    0.33
   3   1  -9    4.18    0.61
   3  -1  -9    3.89    0.24
  -3   1   9    3.91    0.30
  -3   1   9    4.65    0.44
  -3  -1   9    3.92    0.28
  -3  -1   9    4.78    0.37
  -3   1   9    4.29    0.29
  -3  -1   9    3.80    0.39
   3   1  -8    2.56    0.37
   3  -1  -8    1.70    0.23
   3  -1  -8    1.82    0.12
   3  -1  -8    1.88    0.18
   3  -1  -8    1.93    0.45
   3   1  -8    1.92    0.15
   3   1  -8    2.29    0.24
  -3  -1   8    2.14    0.28
  -3  -1   8    2.23    0.24
  -3   1   8    1.85    0.18
  -3   1   8    1.37    0.19
  -3   1   8    2.34    0.29
  -3  -1   8    1.40    0.26
   3   1  -7  172.75    8.34
   3  -1  -7  173.01    8.29
   3  -1  -7  183.63    8.88
   3  -1  -7  167.66    8.07
  -3  -1   7  179.51    9.26
  -3   1   7  168.80    8.41
  -3  -1   7  166.39    8.16
  -3  -1   7  171.31    8.80
  -3   1   7  185.71    9.72
   3  -1  -6    0.38    0.08
  -3  -1   6    0.44    0.14
  -3   1   6    0.28    0.12
  -3  -1   6    0.51    0.13
  -3   1   6    0.61    0.16
   3  -1  -5  113.48    4.67
  -3  -1   5  111.38    4.62
  -3  -1   5  114.99    5.04
   3  -1  -4  301.48   17.39
   3  -1  -4  347.56   20.45
  -3  -1   4  313.06   17.61
  -3  -1   4  286.38   16.90
   3  -1  -3   12.98    0.51
   3  -1  -3   12.03    0.39
   3   1  -3   12.71    0.58
  -3  -1   3   11.05    0.45
  -3  -1   3   11.89    0.47
  -3   1   3   11.46    0.33
  -3  -1   3   10.97    0.29
   3   1  -2   98.69    4.10
   3  -1  -2  106.12    4.14
  -3  -1   2  102.08    4.20
  -3  -1   2  101.66    4.17
  -3   1   2  104.41    4.00
  -3  -1   2   87.28    3.02
   3  -1  -1  236.68   12.04
   3   1  -1  214.52   10.21
  -3  -1   1  218.48   11.32
  -3  -1   1  238.24   12.60
  -3   1   1  238.46   12.22
   3   1   0   86.24    2.98
   3  -1   0   90.23    3.39
  -3   1   0   86.99    3.41
  -3  -1   0   87.67    3.66
  -3  -1   0   73.85    2.78
   3   1   1  194.17    9.01
   3  -1   1  200.26    9.66
  -3  -1  -1  172.58    8.13
  -3   1  -1  184.87    9.19
  -3  -1  -1  188.48    9.69
   3  -1   2   78.25    3.04
   3   1   2   75.31    2.76
  -3  -1  -2   77.71    3.36
  -3  -1  -2   73.18    2.55
  -3   1  -2   78.60    3.28
   3  -1   3    4.18    0.25
   3   1   3    4.46    0.24
  -3   1  -3    4.18    0.37
  -3  -1  -3    4.19    0.37
   3  -1   4    0.39    0.14
   3   1   4    0.34    0.12
  -3  -1  -4    0.57    0.17
  -3   1  -4    0.28    0.11
  -3   1  -4    0.28    0.20
   3   1   5    0.58    0.07
   3  -1   5    0.56    0.09
   3  -1   5    0.65    0.16
   3   1   5    0.77    0.16
  -3  -1  -5    0.55    0.11
  -3   1  -5    0.50    0.10
  -3   1  -5    0.47    0.15
  -3   1  -5    0.44    0.19
  -3  -1  -5    0.47    0.25
  -3  -1  -5    0.61    0.10
   3  -1   6    2.02    0.16
   3   1   6    2.40    0.13
   3  -1   6    2.45    0.18
   3  -1   6    2.58    0.35
   3   1   6    2.34    0.29
  -3  -1  -6    2.41    0.24
  -3   1  -6    2.18    0.30
  -3  -1  -6    2.37    0.43
  -3  -1  -6    3.23    0.26
  -3   1  -6    2.22    0.18
  -3   1  -6    2.41    0.41
   3   1   7    1.02    0.24
   3  -1   7    0.92    0.13
   3  -1   7    1.34    0.27
   3   1   7    0.99    0.14
   3  -1   7    0.78    0.11
  -3  -1  -7    0.57    0.36
  -3   1  -7    0.66    0.28
  -3   1  -7    0.88    0.22
  -3  -1  -7    0.99    0.24
  -3   1  -7    0.92    0.16
  -3  -1  -7    0.94    0.20
   3  -1   8    1.15    0.16
   3   1   8    1.47    0.31
   3   1   8    1.15    0.17
   3  -1   8    1.25    0.33
  -3  -1  -8    0.66    0.34
  -3  -1  -8    1.62    0.29
  -3  -1  -8    1.12    0.25
  -3   1  -8    1.10    0.19
  -3   1  -8    1.52    0.32
  -3   1  -8    0.99    0.41
   3   1   9    0.30    0.24
   3  -1   9    0.37    0.28
   3  -1   9    0.19    0.17
   3   1   9    0.40    0.14
  -3  -1  -9    0.28    0.23
  -3   1  -9    0.33    0.20
  -3  -1  -9    0.25    0.15
  -3   1  -9    0.21    0.27
  -3   1  -9    0.30    0.14
  -3  -1  -9    0.74    0.35
   3   1  10    4.14    0.38
   3  -1  10    4.87    0.41
   3  -1  10    4.49    0.72
   3   1  10    4.28    0.66
  -3   1 -10    3.14    0.88
  -3   1 -10    4.48    0.36
  -3   1 -10    5.85    0.62
  -3  -1 -10    4.74    0.55
  -3  -1 -10    3.75    0.90
  -3  -1 -10    4.55    0.43
   3  -1  11    0.56    0.19
   3   1  11    0.45    0.17
  -3  -1 -11    0.39    0.20
  -3  -1 -11    0.43    0.18
  -3   1 -11    0.28    0.29
   3   1  12    2.05    0.26
   3  -1  12    1.82    0.27
  -3  -1 -12    1.92    0.38
  -3   1 -12    1.90    0.41
   3   1  13   -0.01    0.09
   3  -1  13    0.05    0.09
  -3   1 -13   -0.06    0.16
  -3  -1 -13    0.17    0.10
  -3  -1 -13    0.10    0.14
   3   1  14    0.37    0.08
   3  -1  14    0.72    0.11
  -3   1 -14    0.37    0.18
   3  -2 -16    0.42    0.11
   3  -2 -16    0.11    0.14
   3   2 -16    0.04    0.16
  -3   2  16    0.03    0.11
  -3  -2  16    0.07    0.08
   3  -2 -15    1.74    0.30
   3  -2 -15    1.53    0.26
   3   2 -15    1.65    0.37
  -3  -2  15    1.72    0.25
  -3   2  15    2.36    0.26
   3   2 -14    3.29    0.48
   3  -2 -14    3.13    0.40
   3  -2 -14    3.08    0.37
  -3  -2  14    2.92    0.32
  -3   2  14    3.28    0.27
  -3  -2  14    2.17    0.27
   3   2 -13   23.72    1.44
   3  -2 -13   23.53    1.12
   3  -2 -13   22.62    1.33
   3   2 -13   23.16    0.96
   3  -2 -13   23.09    1.21
  -3  -2  13   23.94    1.01
  -3  -2  13   22.00    1.44
  -3  -2  13   24.44    1.18
  -3   2  13   22.40    1.49
   3  -2 -12    0.37    0.25
   3  -2 -12    0.30    0.21
   3  -2 -12    0.39    0.22
   3   2 -12    0.37    0.14
   3   2 -12    0.45    0.26
  -3  -2  12    0.41    0.21
  -3  -2  12    0.41    0.17
  -3   2  12    0.19    0.25
  -3  -2  12    0.26    0.27
   3   2 -11    3.78    0.29
   3  -2 -11    4.55    0.43
   3  -2 -11    4.64    0.42
   3  -2 -11    4.99    0.45
   3  -2 -11    3.65    0.71
   3   2 -11    4.23    0.51
   3   2 -11    3.81    0.80
  -3  -2  11    3.90    0.37
  -3   2  11    3.66    0.52
  -3  -2  11    4.31    0.28
  -3  -2  11    3.78    0.40
   3  -2 -10   26.63    1.80
   3   2 -10   29.08    1.14
   3  -2 -10   31.38    1.41
   3  -2 -10   27.88    1.21
   3  -2 -10   29.90    1.19
   3   2 -10   28.36    1.86
   3   2 -10   31.76    1.47
   3   2 -10   30.90    1.49
  -3  -2  10   28.93    1.10
  -3  -2  10   29.15    1.22
  -3  -2  10   30.19    1.55
  -3   2  10   30.95    1.43
   3   2  -9  141.84    8.23
   3   2  -9  146.93    7.01
   3  -2  -9  146.20    7.07
   3  -2  -9  152.99    7.50
   3   2  -9  143.84    7.05
   3  -2  -9  140.59    6.60
   3  -2  -9  143.34    8.13
  -3  -2   9  153.03    7.88
  -3   2   9  145.89    6.97
  -3   2   9  146.11    7.05
  -3   2   9  152.19    7.67
  -3  -2   9  147.01    7.10
  -3  -2   9  154.00    8.03
   3   2  -8   41.36    1.49
   3   2  -8   44.63    1.70
   3  -2  -8   43.58    2.34
   3  -2  -8   41.62    1.56
   3  -2  -8   39.19    1.43
   3  -2  -8   43.55    1.69
   3   2  -8   43.76    2.13
  -3  -2   8   43.43    1.79
  -3  -2   8   41.98    1.85
  -3  -2   8   42.08    1.45
  -3  -2   8   43.32    1.91
  -3   2   8   45.57    2.14
  -3   2   8   41.85    1.56
  -3   2   8   41.14    1.48
   3  -2  -7  421.10   27.79
   3  -2  -7  452.09   30.22
   3  -2  -7  449.63   30.48
   3   2  -7  451.70   30.62
  -3  -2   7  448.80   31.35
  -3  -2   7  454.51   30.93
  -3   2   7  430.47   30.40
  -3  -2   7  440.28   30.93
   3  -2  -6   71.67    2.70
  -3  -2   6   71.93    3.05
  -3  -2   6   72.25    2.91
   3  -2  -5    2.29    0.21
  -3  -2   5    1.44    0.16
  -3  -2   5    1.73    0.23
   3  -2  -4    6.37    0.33
   3  -2  -4    6.68    0.36
  -3  -2   4    5.86    0.22
  -3  -2   4    6.43    0.38
   3   2  -3  123.96    5.57
   3  -2  -3  129.79    5.68
   3  -2  -3  129.85    5.73
  -3  -2   3  129.45    5.74
  -3  -2   3  129.99    5.18
  -3  -2   3  125.26    5.74
   3   2  -2  167.79    8.01
   3  -2  -2  173.32    8.22
  -3  -2   2  167.71    8.15
  -3  -2   2  175.21    8.62
  -3   2   2  171.30    7.76
   3  -2  -1  145.57    6.50
  -3   2   1  145.56    6.33
  -3  -2   1  148.76    6.92
  -3  -2   1  133.57    6.05
   3  -2   0   11.76    0.46
   3   2   0   10.92    0.24
  -3  -2   0   10.20    0.39
  -3   2   0   11.38    0.40
  -3  -2   0   12.02    0.60
   3   2   1   48.74    1.47
   3  -2   1   47.91    1.74
  -3  -2  -1   46.93    1.57
  -3   2  -1   46.16    1.71
  -3  -2  -1   48.71    2.07
   3  -2   2   62.61    2.48
   3   2   2   60.47    2.08
  -3  -2  -2   58.44    2.00
  -3   2  -2   59.23    2.42
  -3  -2  -2   62.53    2.82
   3   2   3    2.94    0.19
   3  -2   3    3.66    0.33
  -3   2  -3    3.41    0.29
  -3  -2  -3    3.45    0.37
   3   2   4   13.53    0.58
   3  -2   4   13.43    0.38
   3  -2   4   13.93    0.73
  -3  -2  -4   12.92    0.49
  -3  -2  -4   14.86    0.92
  -3   2  -4   13.33    0.80
  -3   2  -4   13.78    0.50
   3  -2   5    4.22    0.22
   3  -2   5    4.83    0.46
   3  -2   5    4.12    0.23
   3   2   5    4.85    0.33
  -3  -2  -5    5.37    0.51
  -3  -2  -5    4.12    0.24
  -3   2  -5    4.29    0.29
  -3   2  -5    5.35    0.47
  -3  -2  -5    4.30    0.24
  -3  -2  -5    4.13    0.27
   3   2   6   14.76    0.72
   3  -2   6   14.51    0.90
   3  -2   6   14.17    0.56
   3  -2   6   13.80    0.47
  -3  -2  -6   13.49    1.01
  -3  -2  -6   14.42    0.65
  -3   2  -6   15.08    0.98
  -3   2  -6   12.86    0.49
  -3   2  -6   14.77    0.72
  -3  -2  -6   14.34    0.66
   3   2   7    0.22    0.11
   3   2   7    0.14    0.08
   3  -2   7   -0.07    0.10
   3  -2   7    0.13    0.09
   3  -2   7    0.02    0.15
  -3  -2  -7   -0.00    0.13
  -3  -2  -7    0.12    0.13
  -3   2  -7    0.03    0.21
  -3   2  -7    0.01    0.17
  -3   2  -7    0.16    0.08
  -3  -2  -7    0.05    0.18
   3   2   8    7.56    0.65
   3  -2   8    8.38    0.72
   3  -2   8    8.11    0.48
   3  -2   8    6.90    0.36
   3   2   8    8.20    0.43
  -3   2  -8    6.74    0.36
  -3   2  -8    9.07    0.68
  -3   2  -8    8.79    0.75
  -3  -2  -8    8.35    0.59
  -3  -2  -8    7.57    0.88
  -3  -2  -8    8.63    0.59
   3  -2   9    4.81    0.38
   3  -2   9    5.35    0.66
   3  -2   9    4.46    0.28
   3   2   9    5.03    0.35
   3   2   9    4.84    0.60
  -3  -2  -9    4.71    0.40
  -3  -2  -9    5.47    0.49
  -3   2  -9    4.42    0.63
  -3   2  -9    5.46    0.63
  -3  -2  -9    3.44    0.78
   3   2  10    6.43    0.46
   3  -2  10    7.71    0.87
   3  -2  10    6.74    0.56
   3   2  10    6.20    0.76
  -3  -2 -10    7.23    0.65
  -3  -2 -10    6.75    0.59
  -3   2 -10    5.96    1.05
  -3   2 -10    8.24    0.67
  -3  -2 -10    4.21    1.12
   3   2  11    1.71    0.25
   3  -2  11    1.96    0.24
  -3  -2 -11    1.61    0.35
  -3   2 -11    1.90    0.47
  -3  -2 -11    1.61    0.30
   3  -2  12   -0.04    0.09
   3   2  12   -0.01    0.09
  -3  -2 -12    0.03    0.11
  -3   2 -12    0.07    0.17
  -3  -2 -12   -0.05    0.10
  -3  -2 -12   -0.06    0.10
   3  -2  13    2.91    0.29
   3   2  13    2.90    0.23
  -3  -2 -13    2.23    0.33
  -3  -2 -13    2.13    0.27
  -3   2 -13    3.05    0.44
   3  -2  14    2.47    0.19
  -3   2 -14    1.79    0.32
   3   3 -16    0.13    0.14
   3  -3 -16    0.37    0.11
  -3  -3  16    0.08    0.07
  -3   3  16    0.02    0.11
   3   3 -15    2.11    0.27
   3  -3 -15    1.84    0.28
   3  -3 -15    2.28    0.27
  -3  -3  15    1.76    0.18
  -3   3  15    2.16    0.27
  -3  -3  15    1.32    0.20
   3  -3 -14    0.63    0.18
   3  -3 -14    0.34    0.20
  -3  -3  14    0.43    0.18
  -3  -3  14    0.72    0.18
   3   3 -13   14.48    0.95
   3  -3 -13   13.20    0.68
   3  -3 -13   12.42    0.82
   3  -3 -13   12.94    0.74
  -3  -3  13   13.32    0.76
  -3  -3  13   12.86    0.60
   3  -3 -12    3.70    0.35
   3   3 -12    4.25    0.51
   3  -3 -12    3.97    0.39
   3  -3 -12    4.19    0.39
  -3  -3  12    3.64    0.57
  -3   3  12    2.40    0.48
  -3  -3  12    3.61    0.46
  -3  -3  12    2.98    0.32
   3   3 -11    5.98    0.89
   3   3 -11    6.54    0.64
   3  -3 -11    5.69    0.74
   3  -3 -11    6.00    0.42
   3  -3 -11    5.92    0.55
   3   3 -11    7.15    0.65
   3  -3 -11    6.15    0.49
  -3  -3  11    6.05    0.53
  -3   3  11    6.07    0.59
  -3  -3  11    6.05    0.38
  -3  -3  11    5.60    0.56
   3   3 -10   13.78    0.85
   3   3 -10   13.80    0.87
   3  -3 -10   12.95    0.70
   3  -3 -10   13.10    1.09
   3  -3 -10   12.94    0.66
   3   3 -10   12.11    0.50
   3  -3 -10   12.59    0.58
   3   3 -10   12.94    1.12
  -3  -3  10   12.67    0.83
  -3  -3  10   12.88    0.54
  -3   3  10   13.13    0.80
  -3  -3  10   12.90    0.81
   3   3  -9    8.52    0.38
   3  -3  -9    9.64    0.87
   3  -3  -9    9.46    0.50
   3   3  -9   10.46    0.62
   3  -3  -9   10.12    0.60
   3   3  -9    9.38    0.75
   3  -3  -9    8.15    0.46
  -3  -3   9    8.77    0.37
  -3  -3   9   10.07    0.61
  -3  -3   9    9.69    0.69
  -3   3   9    9.40    0.45
  -3  -3   9    9.11    0.65
  -3   3   9    9.23    0.71
  -3  -3   9    8.84    0.37
   3   3  -8  112.49    4.93
   3  -3  -8  112.47    4.87
   3  -3  -8  119.14    6.28
   3   3  -8  116.87    6.26
   3  -3  -8  119.69    5.32
   3   3  -8  118.69    5.49
   3  -3  -8  119.73    5.18
  -3  -3   8  112.14    5.40
  -3  -3   8  118.40    5.53
  -3   3   8  123.70    6.03
  -3   3   8  118.37    5.23
  -3  -3   8  121.27    5.92
  -3  -3   8  120.57    5.20
  -3  -3   8  108.58    4.67
   3   3  -7   17.80    0.88
   3   3  -7   16.85    0.69
   3  -3  -7   17.31    0.64
   3  -3  -7   16.82    0.61
   3  -3  -7   16.23    0.54
  -3  -3   7   16.53    0.89
  -3  -3   7   15.63    0.80
  -3  -3   7   16.73    0.74
  -3  -3   7   16.53    0.56
  -3  -3   7   18.51    0.57
   3  -3  -6   14.87    0.49
   3  -3  -6   15.08    0.72
  -3  -3   6   15.47    0.58
  -3  -3   6   14.68    0.78
  -3  -3   6   13.94    0.64
   3  -3  -5   45.86    1.70
  -3  -3   5   44.54    1.86
  -3  -3   5   42.06    1.51
   3  -3  -4   22.31    0.91
   3  -3  -4   21.51    0.88
  -3  -3   4   22.52    0.68
  -3  -3   4   22.06    0.94
   3  -3  -3   26.16    0.99
   3  -3  -3   26.43    1.01
  -3  -3   3   25.83    1.15
  -3  -3   3   26.18    0.70
  -3  -3   3   26.11    1.09
   3   3  -2   47.84    1.71
   3  -3  -2   48.55    1.85
  -3  -3   2   48.83    1.88
  -3  -3   2   47.22    1.88
  -3   3   2   46.60    1.43
   3   3  -1  133.10    6.03
   3  -3  -1  147.89    6.94
  -3  -3   1  149.68    7.20
  -3  -3   1  148.69    6.97
  -3   3   1  148.17    6.45
   3   3   0   38.93    1.03
   3  -3   0   40.98    1.57
  -3  -3   0   41.17    1.64
  -3  -3   0   38.79    1.41
  -3   3   0   37.70    1.31
   3  -3   1  430.00   30.13
   3   3   1  464.84   30.58
  -3  -3  -1  506.42   34.29
  -3  -3  -1  475.05   33.72
  -3   3  -1  478.57   32.73
   3  -3   2   89.71    3.76
   3   3   2   88.45    3.33
  -3  -3  -2   85.06    3.33
  -3  -3  -2   84.98    4.08
  -3   3  -2   84.40    3.66
   3   3   3   95.34    3.90
   3  -3   3   94.98    4.33
  -3  -3  -3   94.94    3.65
  -3   3  -3   88.16    4.10
  -3  -3  -3   98.78    4.61
   3   3   4  116.51    5.17
   3  -3   4  115.82    5.01
   3  -3   4  118.23    5.00
   3  -3   4  118.78    5.85
  -3  -3  -4  119.91    5.24
  -3   3  -4  117.17    5.81
  -3   3  -4  114.83    5.15
  -3  -3  -4  115.36    6.02
   3   3   5    6.61    0.40
   3  -3   5    6.64    0.30
   3  -3   5    6.58    0.29
   3  -3   5    6.95    0.61
  -3  -3  -5    6.20    0.38
  -3  -3  -5    6.98    0.66
  -3  -3  -5    6.16    0.33
  -3  -3  -5    7.19    0.31
  -3   3  -5    6.88    0.45
  -3   3  -5    6.62    0.62
   3   3   6    0.90    0.22
   3  -3   6    1.06    0.17
   3  -3   6    0.93    0.17
   3  -3   6    0.81    0.31
  -3  -3  -6    0.99    0.20
  -3  -3  -6    0.87    0.17
  -3  -3  -6    0.82    0.15
  -3   3  -6    0.80    0.25
  -3   3  -6    0.83    0.32
  -3  -3  -6    1.38    0.29
   3   3   7   17.31    0.94
   3  -3   7   18.63    0.80
   3  -3   7   16.72    1.18
   3  -3   7   17.38    0.75
  -3  -3  -7   18.69    0.71
  -3  -3  -7   17.47    0.93
  -3  -3  -7   17.89    1.33
  -3   3  -7   19.55    1.23
  -3   3  -7   18.85    0.93
  -3  -3  -7   18.31    0.85
   3   3   8   15.62    0.95
   3  -3   8   17.11    0.85
   3  -3   8   16.06    0.75
   3  -3   8   17.54    1.19
   3   3   8   16.67    0.66
  -3  -3  -8   17.28    0.97
  -3  -3  -8   16.09    1.30
  -3  -3  -8   17.23    0.86
  -3   3  -8   17.53    1.12
  -3   3  -8   15.60    1.29
   3   3   9    5.67    0.37
   3   3   9    6.00    0.60
   3  -3   9    3.55    0.76
   3  -3   9    5.09    0.51
   3  -3   9    4.70    0.35
  -3  -3  -9    5.52    0.49
  -3  -3  -9    4.60    0.65
  -3   3  -9    6.71    0.70
  -3  -3  -9    5.66    0.55
  -3   3  -9    4.44    0.80
   3   3  10    5.42    0.32
   3  -3  10    6.06    0.44
   3  -3  10    4.80    0.33
   3  -3  10    4.04    0.70
   3   3  10    5.80    0.67
  -3  -3 -10    5.60    0.51
  -3   3 -10    4.54    0.92
  -3   3 -10    4.65    0.59
  -3  -3 -10    5.78    0.47
   3   3  11   19.09    0.77
   3  -3  11   19.38    0.91
  -3  -3 -11   17.60    1.03
  -3  -3 -11   18.36    0.86
  -3   3 -11   19.82    1.39
  -3  -3 -11   18.47    0.90
   3   3  12    3.74    0.28
   3  -3  12    4.03    0.31
  -3  -3 -12    3.09    0.38
  -3   3 -12    3.41    0.59
   3   3  13    0.05    0.07
   3  -3  13   -0.04    0.07
  -3  -3 -13    0.06    0.10
  -3   3 -13    0.12    0.16
  -3   3 -14    0.34    0.15
   3   4 -16    0.78    0.15
   3  -4 -16    0.03    0.12
  -3   4  16    0.03    0.11
   3   4 -15    0.80    0.22
   3  -4 -15    0.40    0.19
  -3   4  15    0.80    0.16
  -3  -4  15    0.55    0.14
  -3  -4  15    0.56    0.15
   3  -4 -14    0.10    0.15
   3  -4 -14    0.02    0.12
   3  -4 -14    0.07    0.13
   3   4 -14    0.08    0.17
  -3  -4  14    0.23    0.11
  -3  -4  14    0.04    0.12
   3  -4 -13    0.07    0.18
   3  -4 -13    0.32    0.20
   3  -4 -13    0.08    0.14
   3   4 -13    0.27    0.19
  -3  -4  13    0.15    0.13
  -3  -4  13    0.23    0.16
   3  -4 -12    6.88    0.63
   3  -4 -12    7.36    0.52
   3  -4 -12    7.64    0.50
   3   4 -12    6.94    0.64
  -3   4  12    7.31    0.60
  -3  -4  12    7.08    0.46
  -3  -4  12    7.51    0.83
  -3  -4  12    7.36    0.65
   3  -4 -11    6.85    0.46
   3  -4 -11    5.22    0.49
   3  -4 -11    5.67    0.57
   3  -4 -11    8.60    0.91
   3   4 -11    5.40    0.67
   3   4 -11    6.47    0.61
  -3   4  11    5.28    0.58
  -3  -4  11    6.45    0.60
  -3  -4  11    6.71    0.68
  -3  -4  11    5.77    0.37
   3  -4 -10   33.94    1.61
   3  -4 -10   31.68    1.40
   3  -4 -10   33.13    1.37
   3  -4 -10   31.66    1.94
   3   4 -10   31.87    1.55
   3   4 -10   30.87    2.08
  -3   4  10   32.69    1.68
  -3  -4  10   30.59    1.18
  -3  -4  10   31.88    1.68
  -3  -4  10   31.64    1.42
   3  -4  -9   46.64    2.30
   3  -4  -9   49.20    1.93
   3  -4  -9   51.36    2.26
   3  -4  -9   50.33    1.86
   3   4  -9   48.75    2.13
   3   4  -9   44.09    2.46
  -3   4   9   54.27    2.52
  -3  -4   9   45.31    1.69
  -3  -4   9   50.00    2.37
  -3  -4   9   49.58    1.83
  -3  -4   9   49.20    2.19
  -3  -4   9   48.12    2.19
   3  -4  -8    5.96    0.31
   3  -4  -8    5.85    0.44
   3  -4  -8    5.95    0.62
   3  -4  -8    5.40    0.25
   3   4  -8    6.01    0.59
   3   4  -8    5.65    0.37
  -3   4   8    6.31    0.44
  -3  -4   8    5.74    0.42
  -3  -4   8    6.00    0.52
  -3  -4   8    5.50    0.29
  -3  -4   8    5.07    0.23
  -3  -4   8    5.54    0.35
   3  -4  -7   30.51    1.40
   3  -4  -7   30.20    1.51
   3  -4  -7   30.42    1.06
   3  -4  -7   29.91    1.00
   3   4  -7   27.95    1.42
   3  -4  -7   29.85    0.96
   3   4  -7   28.14    0.97
  -3   4   7   29.46    0.93
  -3  -4   7   28.49    0.99
  -3  -4   7   30.77    1.31
  -3  -4   7   29.00    1.26
  -3  -4   7   29.99    0.96
  -3  -4   7   30.27    1.17
   3  -4  -6   65.06    2.78
   3  -4  -6   60.87    2.11
   3  -4  -6   64.73    2.38
   3   4  -6   58.56    2.15
  -3  -4   6   60.34    2.71
  -3  -4   6   60.45    2.16
  -3  -4   6   62.17    2.22
  -3  -4   6   59.14    2.35
  -3  -4   6   64.35    2.42
   3  -4  -5   44.15    1.79
  -3  -4   5   43.11    1.84
  -3  -4   5   46.27    1.67
   3  -4  -4   34.10    1.33
   3  -4  -4   34.57    1.30
  -3  -4   4   36.57    1.19
  -3  -4   4   33.80    1.48
   3  -4  -3   37.41    1.42
   3  -4  -3   36.13    1.33
  -3  -4   3   36.60    1.54
  -3  -4   3   36.49    1.08
   3  -4  -2    1.22    0.22
  -3   4   2    0.92    0.08
  -3  -4   2    0.98    0.18
  -3  -4   2    0.99    0.25
  -3  -4   2    1.11    0.05
   3  -4  -1   11.52    0.54
   3   4  -1   11.57    0.41
  -3   4   1   11.18    0.37
  -3  -4   1   12.23    0.61
  -3  -4   1   11.69    0.24
  -3  -4   1   11.43    0.61
   3  -4   0    4.09    0.35
   3   4   0    3.37    0.10
  -3   4   0    3.27    0.22
  -3  -4   0    3.27    0.30
   3  -4   1   69.00    2.96
   3   4   1   64.77    2.18
  -3   4  -1   65.49    2.57
  -3  -4  -1   65.99    2.65
  -3  -4  -1   66.48    3.13
   3  -4   2    6.16    0.54
   3   4   2    6.76    0.23
  -3   4  -2    6.84    0.44
  -3  -4  -2    8.47    0.54
  -3  -4  -2    6.85    0.35
   3  -4   3   42.68    1.93
   3  -4   3   41.43    1.39
   3  -4   3   40.50    1.43
   3   4   3   39.07    1.32
  -3   4  -3   40.84    1.42
  -3   4  -3   40.07    1.80
  -3  -4  -3   41.95    1.44
  -3  -4  -3   40.70    1.89
  -3  -4  -3   43.05    1.52
   3  -4   4    0.11    0.08
   3  -4   4    0.13    0.16
   3  -4   4    0.59    0.09
   3   4   4    0.21    0.10
  -3   4  -4    0.13    0.10
  -3   4  -4    0.54    0.15
  -3  -4  -4    0.00    0.22
  -3  -4  -4    0.01    0.12
   3  -4   5   33.91    1.22
   3  -4   5   34.55    1.59
   3  -4   5   33.01    1.14
   3   4   5   33.96    1.32
  -3   4  -5   32.24    1.37
  -3   4  -5   33.30    1.70
  -3  -4  -5   32.74    1.32
  -3  -4  -5   32.29    1.79
  -3  -4  -5   35.36    1.18
   3  -4   6   11.36    0.77
   3  -4   6   11.56    0.60
   3  -4   6   10.93    0.49
   3   4   6   11.53    0.63
  -3   4  -6   11.61    0.79
  -3   4  -6   11.61    0.73
  -3  -4  -6   11.53    0.83
  -3  -4  -6   11.97    0.58
  -3  -4  -6   13.35    0.55
   3  -4   7    1.50    0.34
   3  -4   7    1.38    0.24
   3  -4   7    1.40    0.20
   3   4   7    1.11    0.28
  -3   4  -7    1.32    0.39
  -3   4  -7    1.25    0.27
  -3  -4  -7    1.38    0.23
  -3  -4  -7    1.46    0.24
  -3  -4  -7    1.51    0.45
  -3  -4  -7    1.40    0.22
   3  -4   8    1.01    0.21
   3  -4   8    0.86    0.31
   3  -4   8    0.85    0.19
   3   4   8    0.77    0.28
  -3   4  -8    0.73    0.34
  -3   4  -8    0.59    0.40
  -3  -4  -8    0.83    0.27
  -3  -4  -8    0.58    0.42
  -3  -4  -8    1.08    0.20
   3  -4   9    1.01    0.25
   3  -4   9    0.52    0.40
   3  -4   9    0.81    0.19
   3   4   9    0.72    0.15
   3   4   9    0.77    0.24
  -3   4  -9    0.66    0.36
  -3   4  -9    0.68    0.34
  -3  -4  -9    1.00    0.29
  -3  -4  -9    0.43    0.48
  -3  -4  -9    0.45    0.21
   3  -4  10   28.00    1.15
   3  -4  10   30.13    1.48
   3   4  10   28.81    1.15
  -3   4 -10   30.84    1.76
  -3  -4 -10   30.92    1.34
  -3  -4 -10   27.80    1.55
   3  -4  11    0.33    0.12
   3  -4  11    0.29    0.19
   3   4  11    0.41    0.13
  -3   4 -11    0.60    0.22
  -3  -4 -11    0.45    0.17
   3  -4  12    0.87    0.20
   3   4  12    0.69    0.13
  -3   4 -12    0.72    0.23
  -3  -4 -12    0.81    0.22
   3  -4  13    0.29    0.12
   3   4  13    0.13    0.08
  -3   4 -13    0.32    0.15
  -3  -4 -13    0.31    0.14
   3  -5 -16    0.13    0.12
   3   5 -16    0.17    0.14
  -3   5  16    0.24    0.10
   3  -5 -15    0.29    0.18
   3   5 -15    0.49    0.18
  -3   5  15    0.64    0.16
  -3  -5  15    0.43    0.11
   3  -5 -14    0.74    0.23
   3  -5 -14    0.85    0.20
   3   5 -14    0.65    0.23
  -3  -5  14    0.51    0.12
  -3  -5  14    0.79    0.20
   3  -5 -13    0.03    0.15
   3  -5 -13    0.08    0.17
  -3  -5  13    0.11    0.11
  -3  -5  13    0.11    0.12
   3  -5 -12    5.91    0.59
   3  -5 -12    5.11    0.50
   3   5 -12    5.25    0.51
  -3   5  12    4.65    0.62
  -3  -5  12    4.95    0.37
  -3  -5  12    6.55    0.58
   3  -5 -11    0.92    0.28
   3  -5 -11    0.66    0.24
   3  -5 -11    0.52    0.16
   3   5 -11    0.29    0.33
   3   5 -11    0.85    0.21
  -3   5  11    0.30    0.26
  -3  -5  11    0.77    0.16
  -3  -5  11    0.36    0.34
  -3  -5  11    0.72    0.29
   3  -5 -10   24.81    1.03
   3  -5 -10   23.54    1.69
   3  -5 -10   23.04    1.24
   3  -5 -10   23.33    0.93
   3   5 -10   22.92    1.21
  -3   5  10   22.97    1.32
  -3  -5  10   21.24    0.85
  -3  -5  10   21.30    1.31
  -3  -5  10   23.37    1.28
   3  -5  -9   17.12    0.88
   3  -5  -9   16.62    0.67
   3  -5  -9   16.31    0.73
   3  -5  -9   14.51    1.15
   3   5  -9   14.88    1.09
   3   5  -9   15.64    0.83
  -3   5   9   17.59    0.89
  -3  -5   9   16.32    0.64
  -3  -5   9   15.49    0.94
  -3  -5   9   16.37    0.94
  -3  -5   9   15.84    1.06
  -3  -5   9   15.29    0.59
   3  -5  -8   74.95    3.56
   3  -5  -8   80.41    3.53
   3  -5  -8   75.37    2.99
   3  -5  -8   77.24    3.12
   3   5  -8   70.72    3.62
   3   5  -8   74.18    3.20
  -3   5   8   76.68    3.70
  -3  -5   8   71.75    3.32
  -3  -5   8   76.79    3.40
  -3  -5   8   77.71    3.88
  -3  -5   8   77.12    3.14
  -3  -5   8   72.23    2.82
  -3  -5   8   73.10    2.74
   3  -5  -7    4.56    0.24
   3  -5  -7    4.73    0.46
   3  -5  -7    4.89    0.48
   3  -5  -7    4.96    0.33
   3   5  -7    4.40    0.46
   3   5  -7    3.66    0.27
  -3  -5   7    4.87    0.37
  -3  -5   7    4.40    0.44
  -3  -5   7    4.51    0.24
  -3  -5   7    4.70    0.37
   3  -5  -6    1.57    0.13
   3  -5  -6    1.39    0.29
   3  -5  -6    1.64    0.17
   3  -5  -6    1.24    0.08
   3   5  -6    1.20    0.14
   3   5  -6    0.97    0.22
  -3  -5   6    1.22    0.31
  -3  -5   6    1.46    0.20
  -3  -5   6    1.39    0.15
  -3  -5   6    1.45    0.16
  -3  -5   6    1.22    0.13
   3  -5  -5    8.86    0.52
   3  -5  -5    8.40    0.27
   3  -5  -5    8.56    0.26
   3  -5  -5    9.20    0.34
  -3  -5   5    8.51    0.37
  -3  -5   5    9.12    0.65
  -3  -5   5    8.72    0.42
  -3  -5   5    8.57    0.35
  -3  -5   5    9.07    0.38
   3  -5  -4   12.93    0.40
   3  -5  -4   13.65    0.71
  -3  -5   4   12.49    0.66
  -3  -5   4   12.77    0.46
  -3  -5   4   12.64    0.39
  -3  -5   4   13.06    0.41
   3  -5  -3   23.75    1.09
   3  -5  -3   24.65    0.93
  -3  -5   3   23.13    1.19
  -3  -5   3   23.56    0.72
   3  -5  -2  183.86    9.72
  -3   5   2  190.71    9.01
  -3  -5   2  189.82   10.27
  -3  -5   2  190.52   10.00
  -3  -5   2  186.43    8.70
   3  -5  -1    2.73    0.33
  -3   5   1    2.20    0.16
  -3  -5   1    2.63    0.41
  -3  -5   1    3.23    0.35
   3  -5   0  137.93    6.81
   3   5   0  130.05    5.62
  -3   5   0  130.82    5.96
  -3  -5   0  149.95    7.21
  -3  -5   0  140.78    6.95
  -3  -5   0  147.09    6.09
   3  -5   1   45.32    1.86
   3   5   1   43.78    1.38
  -3   5  -1   42.50    1.62
  -3  -5  -1   46.38    2.17
  -3  -5  -1   43.74    1.84
   3  -5   2   20.31    1.08
   3  -5   2   19.78    0.67
   3  -5   2   19.81    0.67
   3   5   2   20.15    0.64
  -3   5  -2   19.22    0.88
  -3  -5  -2   20.68    1.21
  -3  -5  -2   19.38    0.88
  -3  -5  -2   19.81    0.69
  -3  -5  -2   20.17    0.69
   3  -5   3   15.47    0.45
   3  -5   3   17.31    0.56
   3  -5   3   17.35    1.02
   3  -5   3   15.66    0.53
   3   5   3   16.47    0.56
  -3   5  -3   15.71    0.66
  -3   5  -3   17.05    0.88
  -3  -5  -3   16.69    0.65
  -3  -5  -3   15.84    0.99
  -3  -5  -3   16.70    0.57
  -3  -5  -3   16.19    0.61
   3  -5   4    2.75    0.12
   3  -5   4    3.76    0.47
   3  -5   4    3.05    0.24
   3  -5   4    3.21    0.22
   3   5   4    2.72    0.20
  -3   5  -4    3.32    0.29
  -3   5  -4    3.14    0.41
  -3  -5  -4    2.86    0.19
  -3  -5  -4    3.96    0.46
  -3  -5  -4    3.21    0.22
   3  -5   5    3.82    0.33
   3  -5   5    3.36    0.29
   3  -5   5    4.22    0.46
   3   5   5    4.17    0.29
  -3   5  -5    3.14    0.48
  -3   5  -5    3.63    0.36
  -3  -5  -5    3.81    0.36
  -3  -5  -5    3.43    0.54
  -3  -5  -5    3.46    0.19
  -3  -5  -5    3.39    0.29
   3  -5   6   75.47    3.77
   3  -5   6   75.21    3.35
   3  -5   6   77.22    3.21
   3   5   6   76.43    3.43
  -3   5  -6   74.31    3.91
  -3   5  -6   76.85    3.61
  -3  -5  -6   77.53    3.56
  -3  -5  -6   71.32    3.09
  -3  -5  -6   68.27    3.80
  -3  -5  -6   79.17    3.12
   3  -5   7   22.76    1.08
   3  -5   7   22.38    0.97
   3  -5   7   21.66    1.52
   3   5   7   21.41    1.07
  -3   5  -7   23.24    1.28
  -3   5  -7   22.66    1.53
  -3  -5  -7   21.04    0.96
  -3  -5  -7   20.56    1.52
  -3  -5  -7   23.46    1.25
  -3  -5  -7   24.47    0.99
   3  -5   8    0.79    0.24
   3  -5   8    0.61    0.40
   3  -5   8    1.00    0.23
   3   5   8    0.86    0.26
  -3   5  -8    1.07    0.32
  -3   5  -8    0.49    0.38
  -3  -5  -8    0.65    0.20
  -3  -5  -8    0.53    0.45
  -3  -5  -8    0.84    0.20
  -3  -5  -8    0.89    0.22
   3  -5   9    0.65    0.42
   3  -5   9    0.54    0.19
   3  -5   9    0.50    0.22
   3   5   9    0.65    0.12
   3   5   9    0.48    0.28
  -3   5  -9    0.61    0.29
  -3   5  -9    0.65    0.32
  -3  -5  -9    0.47    0.18
  -3  -5  -9    0.60    0.26
   3  -5  10    1.61    0.28
   3  -5  10    1.37    0.22
   3   5  10    1.48    0.15
  -3   5 -10    1.65    0.31
  -3  -5 -10    1.60    0.32
   3  -5  11    0.61    0.20
   3  -5  11    0.53    0.14
   3   5  11    0.40    0.12
  -3   5 -11    0.64    0.28
  -3  -5 -11    0.61    0.18
   3  -5  12    0.67    0.14
   3   5  12    0.37    0.10
  -3   5 -12    0.44    0.23
  -3  -5 -12    0.38    0.19
   3  -5  13    3.54    0.23
  -3   5 -13    3.87    0.39
  -3  -5 -13    3.11    0.31
   3  -6 -15   -0.04    0.12
   3   6 -15    0.07    0.09
  -3   6  15    0.04    0.10
  -3  -6  15    0.16    0.10
   3  -6 -14    0.07    0.09
   3  -6 -14   -0.25    0.10
   3   6 -14   -0.03    0.10
  -3  -6  14    0.15    0.08
   3  -6 -13    1.81    0.32
   3  -6 -13    1.46    0.22
   3   6 -13    1.26    0.21
  -3  -6  13    1.26    0.22
  -3  -6  13    0.65    0.17
   3  -6 -12    2.07    0.39
   3  -6 -12    2.32    0.34
   3   6 -12    2.15    0.26
  -3  -6  12    1.45    0.21
  -3  -6  12    2.50    0.34
   3  -6 -11    6.87    0.50
   3  -6 -11    7.31    0.66
   3   6 -11    6.17    0.79
   3   6 -11    6.05    0.56
  -3   6  11    7.64    0.61
  -3  -6  11    6.96    0.37
  -3  -6  11    6.55    0.56
   3  -6 -10    0.30    0.12
   3  -6 -10    0.41    0.16
   3   6 -10    0.47    0.13
  -3   6  10    0.04    0.18
  -3  -6  10    0.18    0.11
  -3  -6  10    0.15    0.11
  -3  -6  10    0.18    0.21
   3  -6  -9    3.26    0.32
   3  -6  -9    5.01    0.39
   3  -6  -9    3.77    0.57
   3   6  -9    3.40    0.35
  -3   6   9    3.79    0.49
  -3  -6   9    4.57    0.37
  -3  -6   9    3.26    0.29
  -3  -6   9    3.36    0.22
  -3  -6   9    3.92    0.56
  -3  -6   9    2.38    0.45
   3  -6  -8    5.91    0.61
   3  -6  -8    7.12    0.37
   3  -6  -8    6.82    0.46
   3   6  -8    5.89    0.39
   3   6  -8    5.41    0.65
  -3   6   8    5.86    0.27
  -3  -6   8    5.87    0.33
  -3  -6   8    5.84    0.48
  -3  -6   8    6.38    0.65
  -3  -6   8    6.04    0.51
  -3  -6   8    6.87    0.38
   3  -6  -7    2.53    0.33
   3  -6  -7    2.26    0.13
   3  -6  -7    3.30    0.22
   3  -6  -7    2.85    0.38
   3  -6  -7    2.17    0.17
   3   6  -7    1.91    0.36
   3   6  -7    2.45    0.22
  -3  -6   7    2.28    0.29
  -3  -6   7    2.45    0.32
  -3  -6   7    2.54    0.47
  -3  -6   7    2.45    0.25
  -3  -6   7    3.86    0.27
   3  -6  -6   30.38    1.08
   3  -6  -6   31.92    0.97
   3  -6  -6   31.65    1.44
   3  -6  -6   31.82    1.56
   3  -6  -6   31.80    1.16
   3   6  -6   27.64    1.18
   3   6  -6   28.63    1.00
  -3  -6   6   29.37    1.22
  -3  -6   6   31.75    1.71
  -3  -6   6   31.82    1.22
  -3  -6   6   30.45    1.08
  -3  -6   6   30.44    1.23
   3  -6  -5   14.06    0.42
   3  -6  -5   13.84    0.50
   3  -6  -5   14.54    0.51
   3  -6  -5   14.74    0.74
   3   6  -5   12.34    0.58
  -3  -6   5   13.54    0.60
  -3  -6   5   14.28    0.83
  -3  -6   5   13.92    0.56
  -3  -6   5   14.96    0.59
  -3  -6   5   13.85    0.56
   3  -6  -4    0.08    0.07
   3  -6  -4    0.13    0.04
   3  -6  -4    0.18    0.17
  -3  -6   4    0.08    0.07
  -3  -6   4    0.08    0.08
  -3  -6   4   -0.02    0.18
  -3  -6   4    0.12    0.08
  -3  -6   4    0.10    0.09
   3  -6  -3    0.36    0.22
   3  -6  -3    0.43    0.06
   3  -6  -3    0.43    0.06
   3  -6  -3    0.33    0.09
   3  -6  -3    0.51    0.14
  -3  -6   3    0.49    0.09
  -3  -6   3    0.67    0.09
  -3  -6   3    0.71    0.18
  -3  -6   3    0.34    0.09
   3  -6  -2   89.51    3.62
   3  -6  -2   84.06    3.23
   3  -6  -2   88.63    4.12
   3  -6  -2   86.79    3.16
   3  -6  -2   84.79    3.14
  -3   6   2   85.56    3.23
  -3  -6   2   87.29    3.42
  -3  -6   2   75.99    3.55
  -3  -6   2   88.27    3.47
  -3  -6   2   85.48    3.18
   3  -6  -1   12.57    0.41
   3  -6  -1   13.90    0.67
   3  -6  -1   13.34    0.40
   3  -6  -1   11.93    0.38
  -3   6   1   12.20    0.44
  -3  -6   1   13.19    0.37
  -3  -6   1   11.69    0.83
  -3  -6   1   12.82    0.68
  -3  -6   1   12.52    0.44
  -3  -6   1   13.24    0.48
   3  -6   0    5.05    0.21
   3  -6   0    5.29    0.20
   3  -6   0    5.12    0.21
   3  -6   0    5.31    0.23
   3  -6   0    6.09    0.42
  -3  -6   0    5.44    0.22
  -3   6   0    5.63    0.28
  -3  -6   0    5.36    0.45
  -3  -6   0    4.75    0.47
  -3  -6   0    5.59    0.19
   3  -6   1    4.66    0.20
   3  -6   1    4.60    0.25
   3  -6   1    4.97    0.20
   3  -6   1    5.17    0.24
   3  -6   1    4.82    0.44
  -3   6  -1    4.69    0.31
  -3  -6  -1    5.21    0.50
  -3  -6  -1    6.04    0.43
  -3  -6  -1    4.11    0.26
   3  -6   2    6.85    0.33
   3  -6   2    6.35    0.23
   3  -6   2    7.26    0.66
   3  -6   2    6.26    0.26
   3  -6   2    6.63    0.24
   3   6   2    6.96    0.26
  -3   6  -2    6.20    0.33
  -3   6  -2    6.40    0.45
  -3  -6  -2    6.64    0.27
  -3  -6  -2    6.55    0.60
  -3  -6  -2    5.93    0.47
  -3  -6  -2    6.97    0.32
   3  -6   3   34.26    1.06
   3  -6   3   34.98    1.82
   3  -6   3   35.04    1.26
   3  -6   3   33.41    1.23
   3  -6   3   34.81    1.06
   3   6   3   34.05    1.18
  -3   6  -3   33.54    1.32
  -3   6  -3   34.67    1.61
  -3  -6  -3   33.85    1.76
  -3  -6  -3   33.83    1.15
  -3  -6  -3   34.81    1.30
  -3  -6  -3   34.03    1.36
   3  -6   4    5.67    0.66
   3  -6   4    6.00    0.37
   3  -6   4    6.13    0.24
   3  -6   4    5.51    0.19
   3  -6   4    5.76    0.38
   3   6   4    5.99    0.29
  -3   6  -4    5.85    0.40
  -3   6  -4    5.62    0.57
  -3  -6  -4    4.44    0.37
  -3  -6  -4    5.50    0.34
  -3  -6  -4    6.45    0.65
   3  -6   5    1.73    0.20
   3  -6   5    1.67    0.36
   3  -6   5    1.54    0.11
   3  -6   5    1.50    0.26
   3   6   5    1.99    0.21
  -3   6  -5    1.64    0.29
  -3   6  -5    1.61    0.38
  -3  -6  -5    1.78    0.27
  -3  -6  -5    1.47    0.44
  -3  -6  -5    1.99    0.14
  -3  -6  -5    1.38    0.17
   3  -6   6    9.38    0.88
   3  -6   6    8.34    0.47
   3  -6   6    8.67    0.58
   3   6   6    7.97    0.55
  -3   6  -6    7.53    0.61
  -3   6  -6    8.04    0.80
  -3  -6  -6    8.22    0.61
  -3  -6  -6    9.41    0.87
  -3  -6  -6    7.60    0.46
  -3  -6  -6    9.00    0.38
   3  -6   7    0.68    0.23
   3  -6   7    0.65    0.41
   3  -6   7    0.64    0.25
   3   6   7    0.49    0.21
  -3   6  -7    0.83    0.23
  -3   6  -7    0.61    0.29
  -3  -6  -7    0.92    0.16
  -3  -6  -7    0.77    0.26
  -3  -6  -7    0.61    0.41
  -3  -6  -7    0.52    0.18
   3  -6   8    0.13    0.11
   3  -6   8   -0.04    0.12
   3  -6   8   -0.05    0.20
   3   6   8    0.09    0.13
  -3   6  -8    0.01    0.19
  -3   6  -8   -0.04    0.12
  -3  -6  -8    0.06    0.11
  -3  -6  -8   -0.01    0.08
  -3  -6  -8   -0.04    0.09
   3  -6   9    0.61    0.17
   3  -6   9    0.32    0.41
   3  -6   9    0.45    0.18
  -3   6  -9    0.30    0.40
  -3   6  -9    0.50    0.25
  -3  -6  -9    0.51    0.20
   3  -6  10    2.81    0.34
   3  -6  10    2.43    0.28
   3   6  10    2.37    0.18
  -3   6 -10    2.42    0.43
  -3  -6 -10    2.30    0.32
   3  -6  11   -0.06    0.11
   3  -6  11    0.10    0.08
   3   6  11   -0.01    0.05
  -3   6 -11    0.04    0.14
  -3  -6 -11   -0.03    0.12
   3  -6  12    5.09    0.38
   3  -6  12    4.57    0.27
  -3   6 -12    5.00    0.47
  -3  -6 -12    5.25    0.41
   3  -6  13   -0.02    0.10
  -3   6 -13    0.10    0.13
  -3  -6 -13    0.45    0.12
   3  -7 -15    8.30    0.52
   3   7 -15    6.75    0.39
  -3   7  15    8.62    0.42
  -3  -7  15    8.10    0.43
   3  -7 -14    1.21    0.25
   3  -7 -14    1.28    0.27
   3   7 -14    0.75    0.20
  -3  -7  14    1.02    0.23
   3  -7 -13    3.13    0.39
   3  -7 -13    2.91    0.37
   3   7 -13    2.36    0.27
  -3  -7  13    2.34    0.36
   3  -7 -12    0.08    0.18
   3  -7 -12    0.38    0.16
   3   7 -12    0.14    0.15
  -3  -7  12    0.04    0.19
   3  -7 -11   13.03    0.75
   3  -7 -11   14.38    0.90
   3   7 -11   11.41    0.68
   3   7 -11   12.77    1.13
  -3   7  11   12.45    0.92
  -3  -7  11   13.41    0.77
   3  -7 -10    0.10    0.12
   3  -7 -10    0.27    0.20
   3   7 -10    0.16    0.15
  -3   7  10    0.26    0.18
  -3  -7  10    0.46    0.17
  -3  -7  10    0.09    0.12
   3  -7  -9    0.95    0.23
   3  -7  -9    1.66    0.28
   3   7  -9    1.26    0.22
  -3   7   9    0.87    0.36
  -3  -7   9    1.52    0.32
  -3  -7   9    1.38    0.44
  -3  -7   9    1.55    0.23
   3  -7  -8    0.76    0.19
   3  -7  -8    1.25    0.18
   3   7  -8    0.90    0.17
  -3  -7   8    1.08    0.13
  -3  -7   8    1.05    0.40
  -3  -7   8    1.28    0.22
  -3  -7   8    1.04    0.22
   3  -7  -7   13.87    0.64
   3  -7  -7   17.48    0.54
   3  -7  -7   17.15    0.75
   3  -7  -7   17.12    1.03
   3   7  -7   15.50    0.61
  -3  -7   7   16.02    0.78
  -3  -7   7   16.27    1.15
  -3  -7   7   16.51    0.83
  -3  -7   7   17.11    0.79
   3  -7  -6    5.30    0.22
   3  -7  -6    5.18    0.31
   3  -7  -6    5.77    0.54
   3  -7  -6    5.13    0.26
  -3  -7   6    5.15    0.37
  -3  -7   6    4.29    0.38
  -3  -7   6    4.98    0.40
  -3  -7   6    5.06    0.37
  -3  -7   6    4.86    0.63
   3  -7  -5   54.98    2.04
   3  -7  -5   54.13    1.81
   3  -7  -5   56.68    2.06
  -3  -7   5   55.85    2.93
  -3  -7   5   55.40    2.18
  -3  -7   5   55.03    2.21
  -3  -7   5   55.67    2.27
  -3  -7   5   55.55    2.18
   3  -7  -4   30.01    0.92
   3  -7  -4   30.10    0.99
   3  -7  -4   31.49    1.11
  -3  -7   4   29.91    1.19
  -3  -7   4   29.07    1.04
  -3  -7   4   30.02    1.11
  -3  -7   4   30.49    1.73
  -3  -7   4   30.95    1.13
   3  -7  -3   15.55    0.47
   3  -7  -3   17.04    0.48
   3  -7  -3   15.87    0.49
   3  -7  -3   17.04    0.62
   3  -7  -3   14.44    0.82
  -3  -7   3   17.16    0.59
  -3  -7   3   16.56    0.57
  -3  -7   3   16.95    0.90
  -3  -7   3   17.00    0.60
  -3  -7   3   15.85    0.53
   3  -7  -2    0.41    0.18
   3  -7  -2    0.31    0.08
   3  -7  -2    0.35    0.11
   3  -7  -2    0.27    0.08
   3  -7  -2    0.25    0.08
   3  -7  -2    0.23    0.12
  -3  -7   2    0.39    0.22
  -3  -7   2    0.24    0.11
  -3  -7   2    0.50    0.11
  -3  -7   2    0.32    0.08
   3  -7  -1   22.92    0.81
   3  -7  -1   22.94    0.75
   3  -7  -1   23.66    0.70
   3  -7  -1   23.09    0.74
   3  -7  -1   21.66    1.23
  -3  -7   1   23.33    0.85
  -3  -7   1   22.54    1.10
  -3  -7   1   23.46    0.71
  -3  -7   1   23.75    1.18
   3  -7   0   19.52    0.60
   3  -7   0   19.45    0.62
   3  -7   0   20.26    0.73
   3  -7   0   20.05    1.17
   3  -7   0   19.92    0.68
  -3  -7   0   19.78    0.68
  -3  -7   0   19.98    0.94
  -3  -7   0   20.41    0.63
  -3  -7   0   20.13    0.74
  -3  -7   0   19.96    1.15
   3  -7   1    0.46    0.08
   3  -7   1    0.58    0.12
   3  -7   1    0.45    0.08
   3  -7   1    0.68    0.21
   3  -7   1    0.34    0.13
  -3   7  -1    0.38    0.15
  -3  -7  -1    0.39    0.20
  -3  -7  -1    0.42    0.12
  -3  -7  -1    0.52    0.11
  -3  -7  -1    1.24    0.26
   3  -7   2    9.64    0.39
   3  -7   2    9.00    0.36
   3  -7   2    9.21    0.35
   3  -7   2    8.63    0.37
   3  -7   2    8.59    0.77
   3   7   2    9.56    0.35
  -3   7  -2    8.80    0.58
  -3  -7  -2    9.40    0.59
  -3  -7  -2    8.89    0.36
  -3  -7  -2    9.32    0.76
  -3  -7  -2    9.15    0.41
  -3  -7  -2    9.18    0.43
   3  -7   3    4.47    0.62
   3  -7   3    4.49    0.33
   3  -7   3    4.60    0.22
   3  -7   3    4.37    0.24
   3  -7   3    4.82    0.35
   3   7   3    4.95    0.28
  -3   7  -3    4.35    0.33
  -3   7  -3    4.84    0.46
  -3  -7  -3    4.48    0.59
  -3  -7  -3    4.70    0.30
  -3  -7  -3    4.78    0.30
  -3  -7  -3    3.95    0.40
   3  -7   4   42.59    2.38
   3  -7   4   44.82    1.57
   3  -7   4   45.52    1.88
   3  -7   4   41.68    1.38
   3  -7   4   44.22    1.84
   3   7   4   44.31    1.72
  -3   7  -4   44.26    2.21
  -3   7  -4   40.98    1.77
  -3  -7  -4   42.67    1.66
  -3  -7  -4   43.76    1.81
  -3  -7  -4   40.60    2.24
   3  -7   5    8.61    0.34
   3  -7   5    8.79    0.50
   3  -7   5    8.59    0.72
   3  -7   5    8.96    0.61
   3   7   5    8.78    0.48
  -3   7  -5    8.69    0.68
  -3   7  -5    8.39    0.59
  -3  -7  -5    8.59    0.60
  -3  -7  -5    9.60    0.85
  -3  -7  -5    8.49    0.46
   3  -7   6    2.92    0.36
   3  -7   6    2.96    0.57
   3  -7   6    2.98    0.38
   3  -7   6    2.42    0.15
  -3   7  -6    2.50    0.51
  -3   7  -6    2.56    0.38
  -3  -7  -6    2.35    0.26
  -3  -7  -6    1.74    0.56
  -3  -7  -6    2.95    0.39
  -3  -7  -6    3.09    0.20
   3  -7   7   32.83    1.95
   3  -7   7   34.93    1.51
   3  -7   7   33.10    1.46
  -3   7  -7   31.05    1.66
  -3   7  -7   31.81    2.05
  -3  -7  -7   30.66    1.28
  -3  -7  -7   34.17    1.52
  -3  -7  -7   37.77    1.43
   3  -7   8    2.50    0.69
   3  -7   8    2.59    0.40
   3  -7   8    2.72    0.31
  -3   7  -8    2.30    0.65
  -3   7  -8    2.71    0.46
  -3  -7  -8    3.49    0.28
  -3  -7  -8    2.79    0.42
   3  -7   9    0.03    0.14
   3  -7   9    0.02    0.09
  -3   7  -9    0.10    0.14
  -3  -7  -9    0.06    0.15
   3  -7  10    0.18    0.16
   3  -7  10    0.21    0.13
   3   7  10    0.12    0.07
  -3   7 -10    0.22    0.18
  -3  -7 -10    0.23    0.18
   3  -7  11    0.69    0.17
   3  -7  11    0.65    0.16
  -3   7 -11    0.69    0.24
  -3  -7 -11    0.84    0.24
   3  -7  12    0.51    0.11
   3  -7  12    0.53    0.16
  -3   7 -12    0.94    0.20
  -3  -7 -12    0.68    0.19
  -3   8  15    0.27    0.09
   3  -8 -14    4.61    0.36
   3  -8 -14    4.89    0.35
  -3  -8  14    4.78    0.37
   3  -8 -13    7.38    0.60
   3  -8 -13    7.17    0.56
   3   8 -13    5.99    0.43
  -3  -8  13    7.80    0.55
   3  -8 -12    4.20    0.47
   3  -8 -12    4.23    0.49
   3   8 -12    4.32    0.36
  -3  -8  12    4.10    0.48
   3  -8 -11    0.08    0.13
   3  -8 -11    0.32    0.15
   3   8 -11    0.01    0.12
  -3  -8  11    0.05    0.20
   3  -8 -10   17.53    0.98
   3  -8 -10   16.97    0.90
   3   8 -10   14.98    0.75
  -3   8  10   16.42    1.13
  -3  -8  10   17.83    1.08
  -3  -8  10   16.56    0.73
   3  -8  -9    2.05    0.24
   3  -8  -9    2.47    0.34
  -3   8   9    1.99    0.35
  -3  -8   9    1.85    0.28
  -3  -8   9    1.69    0.54
  -3  -8   9    2.62    0.41
   3  -8  -8    4.18    0.35
   3  -8  -8    5.49    0.38
   3  -8  -8    5.10    0.43
  -3  -8   8    5.64    0.43
  -3  -8   8    4.54    0.77
  -3  -8   8    5.66    0.53
   3  -8  -7    4.02    0.50
   3  -8  -7    3.90    0.33
   3  -8  -7    3.82    0.20
   3  -8  -7    3.58    0.32
  -3  -8   7    4.00    0.41
  -3  -8   7    4.03    0.43
  -3  -8   7    3.67    0.66
  -3  -8   7    4.49    0.39
   3  -8  -6   57.17    2.06
   3  -8  -6   57.99    2.28
   3  -8  -6   53.85    2.52
   3  -8  -6   57.99    2.34
  -3  -8   6   54.05    3.14
  -3  -8   6   57.62    2.53
  -3  -8   6   57.24    2.51
  -3  -8   6   57.79    2.53
   3  -8  -5   20.50    1.07
   3  -8  -5   21.78    0.78
   3  -8  -5   20.91    0.77
  -3  -8   5   20.94    1.43
  -3  -8   5   21.15    0.84
  -3  -8   5   21.27    0.90
  -3  -8   5   20.94    0.99
   3  -8  -4   25.54    0.89
   3  -8  -4   23.17    1.26
   3  -8  -4   25.19    0.96
   3  -8  -4   24.41    0.80
  -3  -8   4   24.94    0.94
  -3  -8   4   24.63    1.09
  -3  -8   4   23.77    1.57
  -3  -8   4   25.04    0.93
   3  -8  -3    4.61    0.22
   3  -8  -3    4.77    0.21
   3  -8  -3    5.84    0.55
   3  -8  -3    4.84    0.32
  -3  -8   3    4.83    0.62
  -3  -8   3    5.76    0.26
  -3  -8   3    4.90    0.29
  -3  -8   3    5.03    0.38
   3  -8  -2    3.68    0.36
   3  -8  -2    3.11    0.20
   3  -8  -2    2.58    0.20
   3  -8  -2    2.96    0.19
   3  -8  -2    2.85    0.17
  -3  -8   2    3.80    0.27
  -3  -8   2    2.56    0.40
  -3  -8   2    3.09    0.24
   3  -8  -1    1.76    0.16
   3  -8  -1    1.77    0.17
   3  -8  -1    1.78    0.17
   3  -8  -1    1.61    0.21
   3  -8  -1    1.57    0.32
  -3  -8   1    2.31    0.20
  -3  -8   1    2.19    0.21
  -3  -8   1    1.80    0.32
   3  -8   0    2.81    0.45
   3  -8   0    2.80    0.18
   3  -8   0    2.47    0.22
   3  -8   0    2.43    0.19
   3  -8   0    3.38    0.25
  -3  -8   0    3.07    0.25
  -3  -8   0    3.09    0.24
  -3  -8   0    2.85    0.41
  -3  -8   0    3.42    0.29
   3  -8   1    0.09    0.07
   3  -8   1    0.26    0.09
   3  -8   1    0.15    0.09
   3  -8   1    0.09    0.18
   3  -8   1    0.14    0.10
  -3   8  -1    0.10    0.15
  -3  -8  -1    0.17    0.11
  -3  -8  -1   -0.02    0.19
  -3  -8  -1    0.21    0.21
  -3  -8  -1    0.16    0.07
   3  -8   2    3.37    0.25
   3  -8   2    3.40    0.29
   3  -8   2    3.72    0.45
   3  -8   2    4.13    0.31
   3  -8   2    3.31    0.20
  -3   8  -2    3.27    0.40
  -3  -8  -2    3.42    0.22
  -3  -8  -2    3.93    0.27
  -3  -8  -2    3.52    0.27
  -3  -8  -2    3.94    0.44
  -3  -8  -2    3.58    0.44
   3  -8   3    5.46    0.42
   3  -8   3    5.88    0.58
   3  -8   3    4.69    0.38
   3  -8   3    5.05    0.27
   3  -8   3    4.80    0.31
  -3   8  -3    5.33    0.55
  -3  -8  -3    4.60    0.65
  -3  -8  -3    4.71    0.44
  -3  -8  -3    4.99    0.28
  -3  -8  -3    4.59    0.28
   3  -8   4   15.34    0.71
   3  -8   4   14.27    0.59
   3  -8   4   14.61    1.03
   3  -8   4   14.59    0.77
   3  -8   4   14.03    0.50
  -3   8  -4   14.78    0.99
  -3   8  -4   12.74    0.74
  -3  -8  -4   14.70    0.71
  -3  -8  -4   14.07    0.56
  -3  -8  -4   14.37    1.11
   3  -8   5   59.52    3.36
   3  -8   5   55.76    2.37
   3  -8   5   58.16    2.23
   3  -8   5   58.41    2.50
  -3   8  -5   51.72    2.37
  -3   8  -5   55.19    2.78
  -3  -8  -5   55.76    2.29
  -3  -8  -5   51.73    3.02
  -3  -8  -5   56.95    2.58
   3  -8   6   56.10    3.48
   3  -8   6   58.68    2.84
   3  -8   6   61.95    2.96
   3  -8   6   56.25    2.00
  -3   8  -6   53.09    2.55
  -3   8  -6   55.25    3.18
  -3  -8  -6   55.71    2.31
  -3  -8  -6   58.59    2.76
   3  -8   7    9.47    0.57
   3  -8   7    7.93    0.90
   3  -8   7    8.35    0.69
  -3   8  -7    8.74    0.98
  -3   8  -7    7.77    0.65
  -3  -8  -7   10.01    0.71
   3  -8   8    7.37    0.49
   3  -8   8    7.05    0.52
  -3   8  -8    6.46    0.56
  -3  -8  -8    6.64    0.58
   3  -8   9   -0.03    0.09
   3  -8   9    0.03    0.10
  -3   8  -9   -0.04    0.13
  -3  -8  -9    0.22    0.13
   3  -8  10    4.47    0.36
   3  -8  10    4.13    0.36
  -3   8 -10    4.23    0.44
  -3  -8 -10    4.15    0.46
   3  -8  11    0.47    0.17
   3  -8  11    0.49    0.14
  -3   8 -11    0.37    0.18
  -3  -8 -11    0.67    0.22
   3  -8  12    0.86    0.13
  -3  -8 -12    0.75    0.20
   3  -9 -14    0.83    0.19
   3  -9 -14    0.81    0.19
  -3  -9  14    0.83    0.14
   3  -9 -13    1.63    0.27
   3  -9 -13    1.66    0.28
  -3  -9  13    1.83    0.23
   3  -9 -12    0.39    0.18
   3  -9 -12    0.24    0.17
  -3  -9  12    0.21    0.17
   3  -9 -11    8.85    0.60
   3  -9 -11    7.57    0.47
  -3  -9  11    8.53    0.60
   3  -9 -10    2.91    0.32
   3  -9 -10    2.46    0.26
  -3  -9  10    2.86    0.43
  -3  -9  10    1.90    0.23
   3  -9  -9   51.45    2.32
   3  -9  -9   50.23    2.28
  -3   9   9   46.15    2.66
  -3  -9   9   47.77    3.20
  -3  -9   9   46.94    2.14
  -3  -9   9   51.03    2.64
   3  -9  -8    5.27    0.44
   3  -9  -8    6.04    0.44
  -3  -9   8    3.84    0.84
  -3  -9   8    5.78    0.48
  -3  -9   8    6.19    0.50
   3  -9  -7    8.44    0.47
   3  -9  -7    8.07    0.35
   3  -9  -7    8.52    0.44
   3  -9  -7    8.77    0.64
  -3  -9   7    9.03    0.62
  -3  -9   7    8.13    0.66
  -3  -9   7    8.04    0.98
  -3  -9   7    8.71    0.65
   3  -9  -6   53.91    2.35
   3  -9  -6   56.22    2.14
   3  -9  -6   55.51    2.92
  -3  -9   6   59.18    2.55
  -3  -9   6   55.02    3.48
  -3  -9   6   57.16    2.72
  -3  -9   6   59.46    2.62
   3  -9  -5   15.53    1.07
   3  -9  -5   17.06    0.68
   3  -9  -5   15.46    0.76
  -3  -9   5   15.22    1.33
  -3  -9   5   16.09    0.76
  -3  -9   5   16.26    0.77
  -3  -9   5   15.64    0.90
   3  -9  -4    0.75    0.18
   3  -9  -4    0.93    0.15
   3  -9  -4    0.68    0.30
   3  -9  -4    0.86    0.10
  -3  -9   4    0.72    0.40
  -3  -9   4    0.64    0.24
  -3  -9   4    0.66    0.14
  -3  -9   4    0.48    0.20
   3  -9  -3    0.81    0.21
   3  -9  -3    0.80    0.34
   3  -9  -3    1.09    0.13
   3  -9  -3    1.35    0.13
  -3  -9   3    0.94    0.26
  -3  -9   3    0.88    0.22
  -3  -9   3    0.70    0.42
   3  -9  -2   95.82    4.29
   3  -9  -2   94.88    4.79
   3  -9  -2   99.98    4.24
   3  -9  -2   99.33    4.16
   3  -9  -2   96.10    3.89
  -3  -9   2   99.82    4.37
  -3  -9   2   98.80    4.26
  -3  -9   2   92.47    4.79
   3  -9  -1    0.96    0.27
   3  -9  -1    0.69    0.15
   3  -9  -1    0.58    0.15
   3  -9  -1    0.63    0.14
   3  -9  -1    0.53    0.13
  -3  -9   1    0.35    0.31
  -3  -9   1    0.60    0.20
  -3  -9   1    0.74    0.18
   3  -9   0   15.48    0.99
   3  -9   0   16.27    0.65
   3  -9   0   15.92    0.60
   3  -9   0   16.83    0.69
   3  -9   0   15.91    0.76
  -3   9   0   15.76    0.83
  -3  -9   0   15.81    1.10
  -3  -9   0   15.94    0.73
  -3  -9   0   16.57    0.66
   3  -9   1    0.05    0.10
   3  -9   1    0.11    0.17
   3  -9   1    0.11    0.09
   3  -9   1    0.10    0.10
   3  -9   1    0.07    0.10
  -3   9  -1    0.01    0.14
  -3  -9  -1    0.02    0.10
  -3  -9  -1    0.14    0.11
  -3  -9  -1    0.02    0.19
   3  -9   2   17.05    0.72
   3  -9   2   16.58    0.71
   3  -9   2   15.55    1.27
   3  -9   2   16.06    0.61
   3  -9   2   16.40    0.84
  -3   9  -2   15.96    0.89
  -3  -9  -2   16.10    0.63
  -3  -9  -2   15.85    1.03
  -3  -9  -2   16.02    1.02
  -3  -9  -2   17.72    0.74
   3  -9   3    0.56    0.15
   3  -9   3    0.41    0.19
   3  -9   3    0.72    0.20
   3  -9   3    0.33    0.34
   3  -9   3    0.38    0.15
  -3   9  -3    0.37    0.27
  -3  -9  -3    0.27    0.31
  -3  -9  -3    0.31    0.15
  -3  -9  -3    0.32    0.15
   3  -9   4   87.21    3.64
   3  -9   4   86.45    4.13
   3  -9   4   87.58    4.03
   3  -9   4   86.92    3.83
   3  -9   4   82.90    4.89
  -3  -9  -4   85.44    3.79
  -3  -9  -4   85.25    3.94
  -3  -9  -4   82.94    4.73
  -3   9  -4   87.89    4.68
   3  -9   5    0.79    0.12
   3  -9   5    1.05    0.24
   3  -9   5    1.03    0.31
   3  -9   5    0.85    0.45
   3  -9   5    0.82    0.19
  -3   9  -5    0.51    0.38
  -3  -9  -5    1.02    0.23
  -3  -9  -5    0.61    0.18
   3  -9   6   36.92    1.89
   3  -9   6   36.55    1.84
   3  -9   6   34.00    2.44
   3  -9   6   35.51    1.31
  -3   9  -6   34.45    2.30
  -3  -9  -6   34.62    1.69
   3  -9   7    2.45    0.15
   3  -9   7    2.59    0.30
   3  -9   7    2.19    0.36
  -3   9  -7    2.05    0.31
  -3  -9  -7    2.00    0.35
   3  -9   8    0.54    0.18
   3  -9   8    0.58    0.21
  -3   9  -8    0.49    0.20
  -3  -9  -8    0.66    0.23
   3  -9   9    2.41    0.24
   3  -9   9    2.20    0.33
  -3   9  -9    2.05    0.30
  -3  -9  -9    2.53    0.30
   3  -9  10    5.30    0.37
   3  -9  10    5.08    0.35
  -3   9 -10    4.10    0.39
  -3  -9 -10    5.11    0.45
   3  -9  11    1.72    0.22
   3  -9  11    1.89    0.19
  -3  -9 -11    0.75    0.25
   3 -10 -13    0.06    0.11
   3 -10 -13    0.07    0.10
  -3 -10  13    0.08    0.13
   3 -10 -12    1.53    0.24
   3 -10 -12    1.17    0.21
  -3 -10  12    1.49    0.30
   3 -10 -11    0.11    0.11
   3 -10 -11    0.33    0.13
  -3 -10  11    0.34    0.20
   3 -10 -10    1.65    0.25
   3 -10 -10    1.81    0.26
  -3 -10  10    1.61    0.20
  -3 -10  10    1.75    0.36
   3 -10  -9    3.01    0.28
   3 -10  -9    2.68    0.34
  -3 -10   9    3.43    0.36
  -3 -10   9    3.22    0.24
   3 -10  -8    1.67    0.22
   3 -10  -8    1.59    0.22
  -3 -10   8    1.45    0.30
  -3 -10   8    1.57    0.33
  -3 -10   8    1.42    0.59
   3 -10  -7   16.79    1.13
   3 -10  -7   17.30    0.63
   3 -10  -7   16.88    0.86
  -3 -10   7   18.46    1.02
  -3 -10   7   17.27    0.95
  -3 -10   7   17.98    0.87
  -3 -10   7   17.21    1.52
   3 -10  -6   20.45    0.85
   3 -10  -6   20.21    0.70
   3 -10  -6   19.51    1.11
  -3 -10   6   20.11    1.10
  -3 -10   6   21.85    1.07
  -3 -10   6   19.76    0.85
  -3 -10   6   19.66    1.63
   3 -10  -5    3.78    0.29
   3 -10  -5    3.98    0.36
   3 -10  -5    3.87    0.57
  -3 -10   5    4.18    0.45
  -3 -10   5    4.36    0.50
  -3 -10   5    4.00    0.34
  -3 -10   5    3.33    0.76
   3 -10  -4   22.70    1.26
   3 -10  -4   24.52    0.97
   3 -10  -4   24.69    0.89
  -3 -10   4   23.27    1.18
  -3 -10   4   23.76    1.78
  -3 -10   4   23.92    1.30
   3 -10  -3   15.65    1.10
   3 -10  -3   15.06    0.67
   3 -10  -3   15.52    0.75
   3 -10  -3   16.31    0.67
  -3 -10   3   14.60    0.79
  -3 -10   3   14.74    0.76
  -3 -10   3   14.43    1.07
   3 -10  -2    8.73    0.44
   3 -10  -2    8.41    0.53
   3 -10  -2    8.80    0.51
   3 -10  -2    8.07    0.82
  -3 -10   2    8.30    0.86
  -3 -10   2    8.50    0.60
  -3 -10   2    8.34    0.46
   3 -10  -1    2.10    0.37
   3 -10  -1    1.97    0.26
   3 -10  -1    1.48    0.17
   3 -10  -1    1.70    0.24
   3 -10  -1    1.91    0.23
  -3 -10   1    1.48    0.30
  -3 -10   1    2.44    0.23
  -3 -10   1    1.29    0.48
   3 -10   0   16.64    1.31
   3 -10   0   15.80    0.64
   3 -10   0   15.71    0.86
   3 -10   0   15.58    0.65
   3 -10   0   16.36    0.76
  -3 -10   0   16.21    0.78
  -3 -10   0   14.54    1.16
  -3 -10   0   17.08    0.80
   3 -10   1    0.59    0.15
   3 -10   1    0.28    0.18
   3 -10   1    0.53    0.30
   3 -10   1    0.52    0.18
   3 -10   1    0.68    0.18
  -3 -10  -1    0.54    0.18
  -3 -10  -1    0.57    0.15
  -3 -10  -1    0.17    0.30
   3 -10   2   14.14    0.78
   3 -10   2   12.71    1.28
   3 -10   2   13.23    0.70
   3 -10   2   12.96    0.76
   3 -10   2   14.40    0.82
  -3  10  -2   13.35    0.96
  -3 -10  -2   12.98    0.60
  -3 -10  -2   13.49    1.05
  -3 -10  -2   13.78    0.70
   3 -10   3   56.61    2.44
   3 -10   3   52.44    3.34
   3 -10   3   58.05    2.64
   3 -10   3   54.98    2.84
   3 -10   3   58.09    2.76
  -3  10  -3   56.70    3.02
  -3 -10  -3   54.26    2.32
   3 -10   4    2.23    0.32
   3 -10   4    1.96    0.32
   3 -10   4    1.93    0.25
   3 -10   4    1.84    0.60
   3 -10   4    1.92    0.41
  -3  10  -4    2.16    0.51
  -3 -10  -4    1.96    0.28
  -3 -10  -4    1.85    0.24
   3 -10   5   76.09    3.81
   3 -10   5   72.86    3.17
   3 -10   5   69.16    4.44
   3 -10   5   75.48    3.01
   3 -10   5   77.56    3.83
  -3  10  -5   72.10    4.22
  -3 -10  -5   75.52    3.51
   3 -10   6    2.11    0.21
   3 -10   6    2.94    0.40
   3 -10   6    2.66    0.39
  -3 -10  -6    2.30    0.31
   3 -10   7    8.35    0.31
   3 -10   7    7.82    0.51
  -3 -10  -7    7.19    0.55
   3 -10   8    0.19    0.16
   3 -10   8    0.09    0.16
  -3 -10  -8    0.22    0.15
   3 -10   9    0.44    0.18
   3 -10   9    0.45    0.17
  -3 -10  -9    0.40    0.15
   3 -10  10    0.06    0.10
   3 -10  10    0.08    0.10
  -3 -10 -10    0.07    0.12
   3 -11 -12    2.65    0.25
  -3 -11  12    2.63    0.33
   3 -11 -11    3.78    0.32
  -3 -11  11    3.49    0.40
   3 -11 -10    3.58    0.34
  -3 -11  10    3.02    0.43
  -3 -11  10    3.38    0.20
   3 -11  -9    0.02    0.13
  -3 -11   9    0.19    0.17
  -3 -11   9    0.20    0.12
   3 -11  -8    2.27    0.23
  -3 -11   8    2.72    0.25
  -3 -11   8    2.57    0.36
   3 -11  -7    1.71    0.46
   3 -11  -7    2.74    0.16
   3 -11  -7    2.76    0.29
  -3 -11   7    2.80    0.35
  -3 -11   7    2.56    0.36
   3 -11  -6   72.79    3.92
   3 -11  -6   77.46    3.21
   3 -11  -6   78.08    3.52
  -3 -11   6   75.23    3.47
  -3 -11   6   73.53    3.65
  -3 -11   6   76.24    3.76
  -3 -11   6   77.04    4.87
   3 -11  -5    7.47    0.63
   3 -11  -5    6.94    0.44
   3 -11  -5    7.23    0.53
  -3 -11   5    6.32    0.43
  -3 -11   5    7.71    0.87
  -3 -11   5    7.01    0.55
  -3 -11   5    6.87    0.62
   3 -11  -4   20.52    1.20
   3 -11  -4   22.47    0.84
   3 -11  -4   21.54    0.88
  -3 -11   4   16.43    1.45
  -3 -11   4   20.50    1.02
  -3 -11   4   21.64    1.09
   3 -11  -3    6.45    0.38
   3 -11  -3    7.04    0.48
   3 -11  -3    7.79    0.46
   3 -11  -3    6.00    0.64
  -3 -11   3    6.31    0.92
  -3 -11   3    6.64    0.60
  -3 -11   3    6.88    0.53
   3 -11  -2    2.55    0.28
   3 -11  -2    2.44    0.22
   3 -11  -2    2.11    0.53
   3 -11  -2    2.43    0.32
  -3 -11   2    1.77    0.59
  -3 -11   2    2.62    0.33
  -3 -11   2    2.27    0.37
   3 -11  -1    7.98    0.89
   3 -11  -1    7.09    0.42
   3 -11  -1    7.39    0.58
   3 -11  -1    7.43    0.54
  -3 -11   1    8.56    0.89
  -3 -11   1    8.50    0.56
  -3 -11   1    7.79    0.59
   3 -11   0   63.64    3.01
   3 -11   0   68.34    2.82
   3 -11   0   64.40    2.62
   3 -11   0   60.78    3.71
   3 -11   0   69.20    3.09
  -3 -11   0   65.84    3.02
  -3 -11   0   66.42    2.95
  -3 -11   0   61.65    3.63
   3 -11   1    0.79    0.20
   3 -11   1    0.41    0.24
   3 -11   1    0.82    0.24
   3 -11   1    0.85    0.36
   3 -11   1    0.64    0.24
  -3 -11  -1    0.73    0.20
  -3 -11  -1    0.59    0.20
  -3 -11  -1    0.32    0.37
   3 -11   2   85.43    5.23
   3 -11   2   89.91    4.60
   3 -11   2   93.80    4.15
   3 -11   2   91.12    4.12
   3 -11   2   94.52    4.38
  -3 -11  -2   92.29    4.19
  -3 -11  -2   86.70    3.83
   3 -11   3   22.80    1.17
   3 -11   3   25.04    1.26
   3 -11   3   22.50    1.57
   3 -11   3   25.24    1.12
   3 -11   3   24.03    1.22
  -3 -11  -3   23.72    1.02
   3 -11   4   45.57    2.27
   3 -11   4   47.35    1.83
   3 -11   4   48.91    2.29
   3 -11   4   47.18    2.00
   3 -11   4   44.78    3.05
   3 -11   5    0.09    0.18
   3 -11   5    0.22    0.11
   3 -11   5    0.13    0.18
   3 -11   5    0.14    0.06
   3 -11   6    1.14    0.26
   3 -11   6    1.23    0.22
   3 -11   6    0.92    0.14
  -3 -11  -6    0.77    0.21
   3 -11   7    3.95    0.33
   3 -11   7    3.36    0.15
   3 -11   7    3.29    0.38
  -3 -11  -7    3.60    0.33
   3 -11   8    0.45    0.13
   3 -11   8    0.23    0.14
  -3 -11  -8    0.12    0.14
   3 -11   9    0.26    0.15
   3 -11   9    0.27    0.15
  -3 -11  -9    0.54    0.12
   3 -11  10    0.18    0.10
   3 -11  10    0.26    0.08
   3 -12 -11    0.37    0.14
  -3 -12  11    0.36    0.16
  -3 -12  11    0.55    0.09
   3 -12 -10    1.14    0.15
  -3 -12  10    0.68    0.13
  -3 -12  10    1.04    0.23
   3 -12  -9   16.49    0.78
  -3 -12   9   17.02    0.73
  -3 -12   9   16.18    0.88
   3 -12  -8   10.31    0.53
  -3 -12   8   11.35    0.60
  -3 -12   8   11.49    0.67
   3 -12  -7    0.13    0.11
   3 -12  -7    0.05    0.06
  -3 -12   7    0.00    0.09
  -3 -12   7    0.12    0.13
   3 -12  -6    0.20    0.14
   3 -12  -6    0.24    0.08
  -3 -12   6    0.25    0.18
  -3 -12   6    0.28    0.13
   3 -12  -5    3.28    0.29
   3 -12  -5    3.01    0.32
  -3 -12   5    3.57    0.41
  -3 -12   5    3.89    0.37
   3 -12  -4    0.22    0.30
   3 -12  -4    0.28    0.14
   3 -12  -4    0.30    0.15
  -3 -12   4    0.14    0.38
  -3 -12   4    0.59    0.22
  -3 -12   4    0.42    0.19
   3 -12  -3   11.77    0.66
   3 -12  -3   12.47    0.54
   3 -12  -3   11.19    0.89
  -3 -12   3   12.63    0.72
  -3 -12   3   12.21    1.25
  -3 -12   3   12.82    0.85
   3 -12  -2    1.75    0.23
   3 -12  -2    2.70    0.30
   3 -12  -2    1.87    0.28
   3 -12  -2    1.57    0.49
  -3 -12   2    1.84    0.28
  -3 -12   2    1.32    0.48
  -3 -12   2    1.90    0.24
   3 -12  -1   31.91    1.39
   3 -12  -1   40.35    1.75
   3 -12  -1   36.65    2.09
   3 -12  -1   39.37    1.60
  -3 -12   1   40.99    1.70
  -3 -12   1   40.80    1.87
  -3 -12   1   37.74    2.51
   3 -12   0    7.41    0.54
   3 -12   0    8.68    0.46
   3 -12   0    8.28    0.62
   3 -12   0    7.60    1.01
  -3 -12   0    8.58    0.51
  -3 -12   0    7.55    0.55
  -3 -12   0    8.47    1.00
   3 -12   1    2.98    0.36
   3 -12   1    3.15    0.28
   3 -12   1    3.72    0.32
   3 -12   1    3.28    0.40
   3 -12   1    3.26    0.73
  -3 -12  -1    3.40    0.31
  -3 -12  -1    2.42    0.67
  -3 -12  -1    3.21    0.26
   3 -12   2    3.85    0.35
   3 -12   2    4.19    0.27
   3 -12   2    4.00    0.38
   3 -12   2    4.27    0.31
  -3 -12  -2    3.25    0.28
  -3 -12  -2    3.84    0.30
   3 -12   3    3.43    0.33
   3 -12   3    3.40    0.29
   3 -12   3    3.35    0.33
   3 -12   3    3.25    0.27
   3 -12   4   12.07    0.59
   3 -12   4   12.40    0.73
   3 -12   4   11.52    0.75
   3 -12   4   12.77    0.52
   3 -12   5    2.10    0.31
   3 -12   5    1.90    0.16
   3 -12   5    1.91    0.21
   3 -12   5    2.12    0.32
   3 -12   6    1.15    0.13
   3 -12   6    0.99    0.25
   3 -12   6    1.46    0.26
   3 -12   7    5.03    0.35
   3 -12   7    4.77    0.39
   3 -12   8    1.00    0.16
   3 -12   8    0.86    0.18
   3 -12   9    1.15    0.15
   3 -12   9    1.28    0.20
   3 -13 -10    1.74    0.18
  -3 -13  10    1.74    0.19
   3 -13  -9    0.20    0.08
  -3 -13   9    0.12    0.09
  -3 -13   9   -0.04    0.10
   3 -13  -8    1.28    0.19
  -3 -13   8    1.33    0.19
  -3 -13   8    1.04    0.19
   3 -13  -7    2.81    0.21
  -3 -13   7    2.74    0.31
   3 -13  -6    4.52    0.26
   3 -13  -6    4.39    0.27
  -3 -13   6    4.75    0.41
   3 -13  -5    1.40    0.19
   3 -13  -5    1.49    0.22
  -3 -13   5    1.65    0.31
   3 -13  -4    1.73    0.24
   3 -13  -4    2.35    0.26
  -3 -13   4    1.60    0.36
  -3 -13   4    1.99    0.30
   3 -13  -3    4.19    0.38
   3 -13  -3    4.15    0.27
  -3 -13   3    4.33    0.39
  -3 -13   3    4.27    0.46
   3 -13  -2    1.36    0.25
   3 -13  -2    1.32    0.24
  -3 -13   2    1.22    0.20
  -3 -13   2    1.76    0.29
   3 -13  -1    0.00    0.10
   3 -13  -1   -0.03    0.08
   3 -13  -1   -0.16    0.09
  -3 -13   1    0.13    0.10
  -3 -13   1   -0.06    0.09
  -3 -13   1    0.02    0.10
   3 -13   0   17.06    0.79
   3 -13   0   14.89    0.81
   3 -13   0   17.18    0.82
  -3 -13   0   14.45    0.59
  -3 -13   0   15.48    0.72
  -3 -13   0   15.26    0.82
   3 -13   1   20.14    0.90
   3 -13   1   19.02    0.86
   3 -13   1   18.49    0.97
  -3 -13  -1   16.96    0.79
  -3 -13  -1   18.30    0.76
   3 -13   2    2.93    0.27
   3 -13   2    3.35    0.26
   3 -13   2    3.44    0.30
   3 -13   2    2.86    0.29
  -3 -13  -2    2.69    0.23
   3 -13   3    1.19    0.16
   3 -13   3    1.17    0.16
   3 -13   3    1.12    0.19
   3 -13   3    1.11    0.24
   3 -13   4    1.00    0.18
   3 -13   4    1.23    0.14
   3 -13   4    1.00    0.24
   3 -13   4    0.96    0.21
   3 -13   5    6.85    0.32
   3 -13   5    6.86    0.25
   3 -13   5    7.09    0.45
   3 -13   5    6.57    0.47
   3 -13   6    0.29    0.13
   3 -13   6    0.20    0.13
   3 -13   7    0.05    0.09
   3 -13   7    0.09    0.08
   3 -13   8    0.95    0.16
   3 -14  -9    0.63    0.09
  -3 -14   9    0.24    0.10
   3 -14  -8    0.08    0.07
  -3 -14   8    0.02    0.07
  -3 -14   8    0.18    0.08
   3 -14  -7    0.48    0.11
  -3 -14   7    0.36    0.15
  -3 -14   7    0.54    0.11
   3 -14  -6    1.45    0.14
   3 -14  -6    1.63    0.17
  -3 -14   6    1.71    0.19
   3 -14  -5    7.37    0.34
   3 -14  -5    7.12    0.32
  -3 -14   5    8.28    0.50
   3 -14  -4    0.28    0.13
   3 -14  -4    0.33    0.13
  -3 -14   4    0.39    0.18
  -3 -14   4    0.20    0.16
   3 -14  -3    9.92    0.43
   3 -14  -3   10.00    0.51
  -3 -14   3    9.41    0.63
  -3 -14   3    9.35    0.55
   3 -14  -2    0.06    0.09
   3 -14  -2    0.00    0.07
  -3 -14   2   -0.03    0.08
  -3 -14   2    0.08    0.08
  -3 -14   2    0.03    0.12
   3 -14  -1    4.78    0.35
   3 -14  -1    4.95    0.33
  -3 -14   1    4.50    0.38
  -3 -14   1    4.75    0.31
  -3 -14   1    4.53    0.29
   3 -14   0    2.52    0.19
   3 -14   0    2.64    0.25
   3 -14   0    2.75    0.27
  -3 -14   0    1.91    0.28
  -3 -14   0    2.43    0.21
   3 -14   1    4.08    0.37
   3 -14   1    5.03    0.32
   3 -14   1    4.50    0.33
  -3 -14  -1    4.65    0.31
   3 -14   2    0.24    0.14
   3 -14   2    0.23    0.12
   3 -14   2    0.28    0.09
   3 -14   3    1.70    0.19
   3 -14   3    1.71    0.23
   3 -14   3    1.78    0.15
   3 -14   4    1.60    0.15
   3 -14   4    1.17    0.12
   3 -14   4    1.02    0.20
   3 -14   4    1.72    0.10
   3 -14   5    0.99    0.17
   3 -14   5    0.91    0.17
   3 -14   6    0.24    0.11
   3 -14   6    0.34    0.10
  -3 -15   7    0.63    0.11
  -3 -15   7    0.41    0.12
   3 -15  -6    0.02    0.04
  -3 -15   6   -0.02    0.06
  -3 -15   6    0.07    0.06
   3 -15  -5    0.08    0.07
   3 -15  -5    0.08    0.06
  -3 -15   5    0.04    0.10
  -3 -15   5    0.12    0.10
   3 -15  -4    1.85    0.16
   3 -15  -4    1.55    0.17
  -3 -15   4    2.08    0.26
  -3 -15   4    1.83    0.18
   3 -15  -3    3.62    0.19
   3 -15  -3    3.47    0.26
  -3 -15   3    3.15    0.29
  -3 -15   3    3.67    0.26
   3 -15  -2    0.50    0.10
  -3 -15   2    0.34    0.16
  -3 -15   2    0.29    0.11
   3 -15  -1    1.79    0.18
  -3 -15   1    0.96    0.13
  -3 -15   1    1.40    0.16
   3 -15   0    0.25    0.10
   3 -15   0    0.32    0.11
  -3 -15   0    0.19    0.10
   3 -15   1    2.36    0.19
   3 -15   1    2.45    0.19
  -3 -15  -1    1.93    0.17
   3 -15   2    3.33    0.20
   3 -15   2    3.02    0.23
   3 -15   3    1.89    0.13
   3 -15   3    1.38    0.16
   3 -15   4    0.94    0.12
  -3 -16   4    0.17    0.10
   3 -16  -3    0.05    0.05
  -3 -16   3    0.32    0.08
   3 -16  -2    1.30    0.11
  -3 -16   2    0.97    0.16
   3 -16  -1    1.19    0.13
  -3 -16   1    0.89    0.13
   3 -16   0    0.33    0.09
   3 -16   1    0.03    0.05
   4   0 -17   -0.01    0.07
   4   0 -16    0.01    0.08
  -4   0  16    0.01    0.06
   4   0 -15    0.07    0.15
   4   0 -15    0.04    0.10
  -4   0  15    0.07    0.10
   4   0 -14   11.75    0.76
   4   0 -14   11.49    0.66
  -4   0  14   12.59    0.66
   4   0 -13   -0.04    0.19
   4   0 -13    0.11    0.10
   4   0 -13    0.93    0.27
  -4   0  13   -0.00    0.12
  -4   0  13    0.02    0.09
  -4   0  13   -0.03    0.21
   4   0 -12    9.86    0.78
   4   0 -12    8.84    0.50
   4   0 -12    7.32    1.18
  -4   0  12    9.18    0.65
  -4   0  12    9.19    0.58
   4   0 -11   -0.06    0.18
   4   0 -11   -0.09    0.11
   4   0 -11    0.09    0.10
   4   0 -11    0.13    0.11
  -4   0  11    0.06    0.11
  -4   0  11   -0.08    0.10
   4   0 -10   15.51    0.75
   4   0 -10   16.06    0.86
   4   0 -10   13.91    0.62
   4   0 -10   15.50    1.30
  -4   0  10   16.33    0.85
  -4   0  10   17.16    0.87
  -4   0  10   16.08    0.79
   4   0  -9    0.06    0.10
   4   0  -9    0.10    0.18
   4   0  -9   -0.08    0.10
   4   0  -9    0.21    0.07
  -4   0   9    0.02    0.06
  -4   0   9    0.04    0.12
  -4   0   9    0.03    0.08
  -4   0   9    0.12    0.12
   4   0  -8    2.02    0.20
   4   0  -8    1.61    0.21
  -4   0   8    2.01    0.24
  -4   0   8    3.40    0.27
  -4   0   8    2.07    0.14
  -4   0   8    2.64    0.27
   4   0  -7    0.71    0.13
   4   0  -7    1.15    0.15
  -4   0   7    0.78    0.16
  -4   0   7    0.89    0.18
  -4   0   7    0.55    0.07
  -4   0   7    0.89    0.11
  -4   0   6   95.33    4.01
  -4   0   6   96.11    4.05
  -4   0   5    0.70    0.21
  -4   0   5    2.24    0.14
   4   0  -4   23.21    1.09
   4   0  -4   22.97    0.64
  -4   0   4   22.92    0.79
  -4   0   4   23.19    0.81
   4   0  -3    2.33    0.30
   4   0  -3    1.93    0.10
  -4   0   3    2.48    0.20
   4   0  -2  633.34   48.05
  -4   0   2  668.25   52.20
   4   0  -1    6.38    0.26
  -4   0   1    7.06    0.46
   4   0   0  182.51    8.57
  -4   0   0  177.36    9.16
   4   0   1    1.01    0.12
  -4   0  -1    0.69    0.09
  -4   0  -1    0.89    0.18
   4   0   2   19.59    0.70
  -4   0  -2   19.38    0.54
  -4   0  -2   17.81    0.83
   4   0   3    0.08    0.09
  -4   0  -3    0.05    0.07
  -4   0  -3    0.06    0.15
   4   0   4   52.96    1.73
   4   0   4   48.74    1.98
  -4   0  -4   55.98    2.21
  -4   0  -4   49.52    1.83
  -4   0  -4   53.90    2.38
   4   0   5    0.06    0.11
   4   0   5    0.03    0.04
  -4   0  -5    0.07    0.09
  -4   0  -5   -0.09    0.16
  -4   0  -5    0.09    0.08
   4   0   6    0.46    0.11
   4   0   6    0.61    0.21
  -4   0  -6    0.03    0.31
  -4   0  -6    0.50    0.17
  -4   0  -6    0.42    0.15
   4   0   7   -0.02    0.07
   4   0   7   -0.04    0.14
  -4   0  -7   -0.06    0.10
  -4   0  -7    0.08    0.14
  -4   0  -7    0.00    0.20
   4   0   8    1.52    0.35
   4   0   8    1.78    0.24
  -4   0  -8    1.65    0.56
  -4   0  -8    2.68    0.34
  -4   0  -8    1.86    0.23
   4   0   9    0.01    0.08
   4   0   9    0.01    0.18
  -4   0  -9    0.00    0.11
  -4   0  -9    0.08    0.25
  -4   0  -9    0.06    0.13
   4   0  10    5.48    0.41
  -4   0 -10    4.66    0.64
  -4   0 -10    5.85    0.44
   4   0  11    0.03    0.11
  -4   0 -11    0.05    0.09
  -4   0 -11    0.20    0.18
   4   0  12    2.27    0.25
  -4   0 -12    2.73    0.32
   4   0  13    0.08    0.07
  -4   0 -13   -0.06    0.12
   4   1 -17    2.42    0.29
   4   1 -16    0.44    0.16
   4  -1 -16    0.53    0.17
   4  -1 -16    0.13    0.11
  -4   1  16    0.43    0.12
  -4  -1  16    0.36    0.12
   4  -1 -15    2.60    0.30
   4  -1 -15    2.65    0.38
   4   1 -15    1.75    0.24
   4   1 -15    2.80    0.32
  -4   1  15    3.40    0.27
  -4  -1  15    2.21    0.25
   4  -1 -14    1.43    0.34
   4   1 -14    1.23    0.22
   4   1 -14    1.42    0.37
   4  -1 -14    1.43    0.25
  -4  -1  14    1.20    0.22
  -4  -1  14    1.07    0.21
  -4   1  14    1.38    0.20
   4   1 -13    1.26    0.36
   4   1 -13    0.91    0.22
   4   1 -13    0.84    0.37
   4  -1 -13    1.34    0.26
   4  -1 -13    0.92    0.49
   4  -1 -13    1.43    0.32
  -4  -1  13    0.89    0.25
  -4  -1  13    0.98    0.20
  -4  -1  13    0.64    0.40
  -4   1  13    0.65    0.37
   4   1 -12    0.10    0.23
   4   1 -12    0.08    0.15
   4  -1 -12    0.18    0.29
   4   1 -12    0.01    0.12
   4  -1 -12    0.14    0.17
   4  -1 -12   -0.04    0.14
   4  -1 -12    0.01    0.14
  -4  -1  12    0.12    0.09
  -4  -1  12    0.09    0.14
  -4  -1  12    0.33    0.17
  -4   1  12   -0.08    0.11
  -4   1  12    0.06    0.16
   4   1 -11   10.44    0.61
   4  -1 -11   10.51    0.69
   4  -1 -11    9.62    0.61
   4   1 -11   10.73    1.11
   4   1 -11   11.57    0.69
   4  -1 -11   10.64    0.72
   4  -1 -11   11.20    0.91
  -4   1  11   10.73    0.75
  -4  -1  11   13.81    0.78
  -4   1  11   10.29    0.57
  -4  -1  11   10.51    0.70
   4  -1 -10    0.43    0.11
   4  -1 -10   -0.01    0.19
   4   1 -10    0.17    0.16
   4   1 -10    0.33    0.15
   4   1 -10    1.02    0.33
   4   1 -10    0.75    0.15
   4  -1 -10    0.29    0.18
   4  -1 -10    0.21    0.32
  -4   1  10    0.30    0.19
  -4  -1  10    0.25    0.20
  -4  -1  10    0.45    0.20
  -4   1  10    0.37    0.17
  -4   1  10    0.26    0.16
  -4  -1  10    0.40    0.18
   4   1  -9    0.53    0.14
   4  -1  -9    0.43    0.25
   4   1  -9    0.42    0.18
   4   1  -9    0.35    0.12
   4  -1  -9    0.29    0.17
   4  -1  -9    0.52    0.16
  -4  -1   9    0.49    0.18
  -4  -1   9    0.53    0.19
  -4  -1   9    0.31    0.08
  -4   1   9    0.34    0.07
  -4  -1   9    0.15    0.16
  -4   1   9    0.47    0.14
  -4   1   9    0.54    0.16
   4  -1  -8   61.33    2.21
   4   1  -8   59.78    2.36
   4   1  -8   63.42    2.59
   4  -1  -8   62.19    2.49
   4  -1  -8   65.55    2.53
  -4   1   8   66.95    2.80
  -4   1   8   65.56    2.59
  -4  -1   8   61.83    2.60
  -4  -1   8   63.75    2.79
  -4  -1   8   65.26    2.68
  -4   1   8   65.46    2.70
  -4   1   8   62.86    2.23
  -4  -1   8   62.65    2.29
   4   1  -7    1.62    0.15
   4   1  -7    1.23    0.17
   4  -1  -7    1.00    0.17
   4  -1  -7    1.14    0.14
  -4   1   7    1.01    0.19
  -4  -1   7    1.41    0.23
  -4  -1   7    1.81    0.15
  -4  -1   7    0.88    0.10
  -4   1   7    1.22    0.22
  -4   1   7    1.48    0.15
  -4   1   6   19.13    0.75
  -4  -1   6   20.12    0.70
  -4  -1   6   17.38    0.78
  -4   1   6   18.50    0.79
   4  -1  -5   70.48    3.05
   4  -1  -5   70.52    2.65
  -4  -1   5   74.24    2.64
  -4  -1   5   73.47    3.08
   4   1  -4   85.77    3.78
   4  -1  -4   85.36    3.65
   4  -1  -4   85.16    3.26
  -4  -1   4   82.21    3.39
  -4  -1   4   84.86    3.38
  -4  -1   4   82.18    2.93
   4   1  -3    2.39    0.25
   4  -1  -3    2.33    0.27
   4  -1  -3    2.51    0.17
  -4  -1   3    2.49    0.25
  -4   1   3    2.35    0.16
   4  -1  -2  518.61   35.53
  -4   1   2  462.56   32.28
  -4  -1   2  563.96   38.85
  -4  -1   2  456.69   32.42
   4  -1  -1  101.85    4.11
   4   1  -1   98.45    3.56
  -4  -1   1  101.69    4.27
  -4  -1   1  102.98    4.62
  -4   1   1  100.28    4.28
   4   1   0  140.91    5.94
   4  -1   0  141.30    6.32
  -4  -1   0  134.15    6.67
  -4  -1   0  144.06    6.44
  -4   1   0  132.66    6.31
   4   1   1   29.61    0.91
   4  -1   1   28.35    0.98
  -4  -1  -1   28.82    1.31
  -4  -1  -1   27.53    0.90
  -4   1  -1   27.86    1.19
   4  -1   2    0.41    0.13
   4   1   2    0.34    0.09
  -4   1  -2    0.42    0.15
  -4  -1  -2    0.41    0.21
  -4  -1  -2    0.32    0.07
   4  -1   3   15.41    0.69
   4   1   3   16.15    0.59
  -4  -1  -3   14.54    0.53
  -4  -1  -3   16.74    0.57
  -4   1  -3   16.29    0.79
  -4   1  -3   16.34    0.68
  -4  -1  -3   15.57    0.94
   4   1   4    1.82    0.09
   4   1   4    1.71    0.21
   4  -1   4    2.39    0.27
   4  -1   4    2.11    0.12
  -4  -1  -4    1.67    0.38
  -4   1  -4    1.87    0.16
  -4  -1  -4    1.91    0.19
  -4  -1  -4    2.00    0.23
  -4   1  -4    2.40    0.41
  -4   1  -4    2.35    0.24
   4   1   5    7.41    0.47
   4   1   5    7.72    0.26
   4  -1   5    7.01    0.28
   4  -1   5    8.25    0.32
   4  -1   5    7.86    0.48
  -4   1  -5    7.33    0.74
  -4  -1  -5    7.91    0.50
  -4  -1  -5    6.24    0.39
  -4   1  -5    7.20    0.37
  -4   1  -5    8.33    0.53
  -4  -1  -5    8.15    0.73
   4   1   6    0.88    0.11
   4   1   6    1.15    0.19
   4  -1   6    0.97    0.15
   4  -1   6    0.83    0.12
   4  -1   6    0.98    0.28
  -4  -1  -6    1.09    0.20
  -4   1  -6    1.27    0.28
  -4  -1  -6    0.85    0.37
  -4  -1  -6    1.17    0.26
  -4   1  -6    1.17    0.38
  -4   1  -6    0.89    0.17
   4  -1   7    6.17    0.65
   4   1   7    6.55    0.34
   4   1   7    6.56    0.58
   4  -1   7    6.48    0.38
  -4   1  -7    5.80    0.40
  -4  -1  -7    6.39    0.79
  -4  -1  -7    6.83    0.56
  -4   1  -7    6.64    0.52
  -4   1  -7    6.10    0.76
  -4  -1  -7    6.52    0.48
   4   1   8   10.42    0.52
   4   1   8   10.57    0.83
   4  -1   8   11.01    0.78
   4  -1   8   11.20    0.62
  -4  -1  -8   10.29    0.68
  -4  -1  -8   10.20    1.16
  -4  -1  -8   11.45    0.82
  -4   1  -8    8.46    1.11
  -4   1  -8   12.59    0.95
  -4   1  -8    9.39    0.56
   4   1   9    0.25    0.13
   4  -1   9    0.02    0.28
   4  -1   9    0.18    0.15
   4   1   9    0.20    0.26
  -4   1  -9    0.22    0.13
  -4  -1  -9    0.05    0.21
  -4   1  -9   -0.02    0.34
  -4   1  -9    0.08    0.26
  -4  -1  -9    0.20    0.35
  -4  -1  -9    0.18    0.18
   4   1  10    4.90    0.38
   4  -1  10    5.65    0.42
  -4   1 -10    5.13    0.39
  -4  -1 -10    5.96    0.62
  -4   1 -10    6.57    0.72
  -4  -1 -10    4.89    0.45
   4   1  11    9.99    0.47
   4  -1  11    9.96    0.59
  -4   1 -11   10.05    0.87
  -4  -1 -11   10.03    0.54
  -4  -1 -11    9.77    0.69
   4   1  12    1.37    0.19
   4  -1  12    1.36    0.22
  -4  -1 -12    1.61    0.25
  -4  -1 -12    1.42    0.21
  -4  -1 -12    1.56    0.24
  -4   1 -12    1.90    0.29
   4  -1  13    2.28    0.19
   4   1  13    2.27    0.16
  -4   1 -13    1.23    0.25
   4   2 -17    1.40    0.25
   4  -2 -16    0.57    0.18
   4   2 -16    0.69    0.18
   4  -2 -16    0.46    0.15
  -4   2  16    0.59    0.12
  -4  -2  16    0.36    0.12
   4   2 -15    2.35    0.30
   4  -2 -15    2.27    0.28
   4  -2 -15    2.93    0.31
  -4  -2  15    1.57    0.18
  -4  -2  15    1.31    0.21
  -4   2  15    1.99    0.26
   4   2 -14    0.89    0.33
   4  -2 -14    0.89    0.29
   4  -2 -14    0.88    0.21
  -4  -2  14    1.08    0.19
  -4  -2  14    0.71    0.22
   4   2 -13    8.00    0.49
   4   2 -13    8.56    0.81
   4  -2 -13    8.43    0.67
   4  -2 -13    9.22    0.68
   4  -2 -13    8.57    0.83
   4  -2 -13    8.79    0.72
  -4  -2  13    9.29    0.50
  -4  -2  13    8.18    0.52
  -4   2  13    8.44    0.69
   4   2 -12   12.57    0.88
   4   2 -12   10.46    0.56
   4   2 -12   10.07    1.30
   4  -2 -12    9.70    1.02
   4  -2 -12   11.86    0.70
   4  -2 -12   11.05    0.80
   4  -2 -12   10.42    0.71
  -4  -2  12   11.07    0.79
  -4  -2  12   11.49    0.55
  -4  -2  12   12.21    0.89
  -4   2  12   11.69    0.87
   4   2 -11    2.48    0.41
   4   2 -11    2.32    0.25
   4   2 -11    1.96    0.59
   4  -2 -11    1.45    0.46
   4  -2 -11    2.17    0.30
   4  -2 -11    2.50    0.38
   4  -2 -11    2.10    0.30
  -4  -2  11    2.21    0.21
  -4  -2  11    1.87    0.37
  -4  -2  11    2.51    0.30
  -4   2  11    2.11    0.39
  -4   2  11    1.68    0.23
   4   2 -10   64.81    2.94
   4   2 -10   60.87    3.34
   4   2 -10   65.48    3.06
   4   2 -10   63.62    2.67
   4  -2 -10   63.38    2.79
   4  -2 -10   61.21    3.54
   4  -2 -10   63.22    2.64
   4  -2 -10   67.92    3.07
  -4  -2  10   61.98    2.41
  -4  -2  10   65.32    3.06
  -4  -2  10   66.37    3.03
  -4  -2  10   65.35    3.23
  -4  -2  10   63.60    2.52
  -4   2  10   63.73    3.06
  -4   2  10   65.26    2.81
   4   2  -9   10.90    0.51
   4   2  -9   11.41    0.68
   4   2  -9   10.67    1.01
   4  -2  -9   11.67    0.67
   4  -2  -9   10.08    0.85
   4  -2  -9   11.25    0.49
   4  -2  -9   11.54    0.65
  -4  -2   9   11.92    0.76
  -4  -2   9   11.01    0.61
  -4  -2   9   11.74    0.70
  -4  -2   9   11.61    0.47
  -4   2   9   11.54    0.73
  -4   2   9   12.37    0.58
  -4   2   9   11.38    0.36
  -4   2   9   11.53    0.55
   4   2  -8   28.52    1.23
   4   2  -8   26.86    1.00
   4  -2  -8   28.67    1.24
   4  -2  -8   29.29    1.07
   4  -2  -8   26.91    0.90
  -4  -2   8   29.44    1.02
  -4  -2   8   28.75    1.24
  -4  -2   8   28.87    1.13
  -4  -2   8   27.88    1.42
  -4   2   8   30.52    1.40
  -4   2   8   28.34    1.07
  -4   2   8   29.68    1.20
  -4   2   8   28.36    0.88
   4   2  -7   75.96    2.95
   4   2  -7   78.93    3.27
   4  -2  -7   80.74    3.28
   4  -2  -7   82.02    3.24
   4  -2  -7   73.21    2.68
  -4  -2   7   79.12    3.29
  -4  -2   7   78.86    3.04
  -4  -2   7   79.33    3.16
  -4  -2   7   78.80    3.65
  -4   2   7   75.50    2.79
  -4   2   7   74.61    3.38
  -4   2   7   76.03    3.00
   4  -2  -6   68.80    2.54
   4  -2  -6   66.76    2.66
   4   2  -6   66.87    2.49
  -4  -2   6   68.51    2.49
  -4  -2   6   63.32    2.83
  -4  -2   6   66.28    2.52
   4  -2  -5   28.03    1.02
   4  -2  -5   28.66    1.35
  -4  -2   5   28.08    1.22
  -4  -2   5   28.35    0.86
   4  -2  -4   36.28    1.25
   4   2  -4   34.74    1.43
   4  -2  -4   30.24    1.45
  -4  -2   4   35.98    1.42
  -4  -2   4   32.81    1.34
  -4  -2   4   35.23    0.97
   4  -2  -3   67.40    2.93
   4   2  -3   67.61    2.85
   4  -2  -3   72.56    2.76
  -4  -2   3   69.71    2.94
  -4   2   3   69.73    2.42
  -4  -2   3   67.32    2.80
   4   2  -2    1.01    0.16
   4  -2  -2    0.80    0.14
  -4  -2   2    0.45    0.17
  -4   2   2    0.63    0.12
  -4  -2   2    0.82    0.16
   4  -2  -1  170.63    8.04
  -4  -2   1  152.78    7.43
  -4  -2   1  161.53    8.19
  -4   2   1  162.36    7.75
   4   2   0   27.95    0.72
   4  -2   0   29.14    1.10
  -4  -2   0   28.90    1.33
  -4  -2   0   25.31    0.93
  -4   2   0   29.24    1.10
   4   2   1    2.63    0.13
   4  -2   1    3.23    0.26
  -4  -2  -1    2.92    0.38
  -4  -2  -1    2.45    0.19
  -4   2  -1    2.77    0.29
   4   2   2   11.85    0.40
   4  -2   2   12.62    0.53
  -4  -2  -2   13.26    0.88
  -4  -2  -2   11.57    0.40
  -4   2  -2   12.72    0.65
   4   2   3   33.64    1.15
   4  -2   3   32.41    1.04
   4  -2   3   33.84    1.43
   4  -2   3   33.14    1.02
  -4   2  -3   32.70    1.25
  -4   2  -3   33.94    1.60
  -4  -2  -3   34.18    1.70
  -4  -2  -3   32.29    1.07
   4   2   4   36.27    1.37
   4  -2   4   34.62    1.18
   4  -2   4   36.80    1.20
   4  -2   4   36.32    1.62
  -4  -2  -4   34.50    1.25
  -4  -2  -4   38.01    1.30
  -4   2  -4   38.03    1.92
  -4   2  -4   32.49    1.13
  -4  -2  -4   35.87    1.90
   4  -2   5  115.37    4.99
   4   2   5  112.37    4.60
   4   2   5  112.87    5.21
   4  -2   5  113.84    5.73
   4  -2   5  110.57    4.77
  -4  -2  -5  116.03    5.29
  -4  -2  -5  112.67    6.11
  -4   2  -5  113.27    6.13
  -4   2  -5  108.88    4.83
  -4  -2  -5  109.53    5.06
  -4   2  -5  116.90    5.37
   4   2   6    0.16    0.07
   4   2   6    0.22    0.15
   4  -2   6    0.23    0.10
   4  -2   6    0.02    0.17
   4  -2   6    0.24    0.11
  -4   2  -6    0.22    0.19
  -4  -2  -6    0.04    0.15
  -4  -2  -6    0.29    0.15
  -4  -2  -6    0.07    0.22
  -4   2  -6    0.37    0.20
  -4   2  -6    0.24    0.10
   4   2   7    0.15    0.17
   4   2   7    0.12    0.08
   4  -2   7    0.09    0.21
   4  -2   7    0.12    0.09
   4  -2   7    0.14    0.10
  -4  -2  -7    0.23    0.16
  -4  -2  -7    0.13    0.27
  -4   2  -7    0.06    0.25
  -4   2  -7    0.27    0.21
  -4   2  -7    0.08    0.10
   4  -2   8    1.46    0.17
   4  -2   8    1.39    0.45
   4   2   8    1.53    0.19
   4   2   8    1.59    0.38
   4  -2   8    1.90    0.27
  -4  -2  -8    1.59    0.33
  -4   2  -8    1.64    0.43
  -4  -2  -8    1.14    0.55
  -4  -2  -8    1.52    0.32
  -4   2  -8    1.69    0.43
   4  -2   9   24.62    1.25
   4   2   9   24.51    1.03
   4   2   9   23.71    1.55
   4  -2   9   24.46    1.78
  -4  -2  -9   23.46    1.91
  -4  -2  -9   25.61    1.43
  -4  -2  -9   23.89    1.30
  -4   2  -9   27.45    1.77
  -4   2  -9   22.65    1.96
   4   2  10    9.04    0.50
   4  -2  10    9.42    0.61
  -4  -2 -10    8.65    0.73
  -4  -2 -10    9.09    0.68
  -4   2 -10    9.46    0.97
   4  -2  11    2.80    0.27
   4   2  11    2.93    0.22
  -4   2 -11    3.02    0.52
  -4  -2 -11    2.58    0.36
  -4  -2 -11    3.15    0.42
   4   2  12   12.68    0.54
   4  -2  12   14.23    0.68
  -4  -2 -12   12.39    0.66
  -4  -2 -12   13.02    0.74
  -4   2 -12   13.10    0.83
  -4  -2 -12   13.34    0.64
   4  -2  13    2.24    0.19
  -4   2 -13    1.08    0.31
   4  -3 -16    0.04    0.09
   4   3 -16    0.04    0.12
   4  -3 -16    0.04    0.11
  -4   3  16    0.03    0.08
   4   3 -15    0.52    0.22
   4  -3 -15    0.48    0.19
   4  -3 -15    0.83    0.15
  -4  -3  15    0.32    0.13
  -4  -3  15    0.24    0.15
  -4   3  15    0.51    0.16
   4   3 -14   23.97    1.39
   4  -3 -14   22.75    1.10
   4  -3 -14   23.50    1.24
   4  -3 -14   23.06    1.11
  -4  -3  14   24.40    1.19
  -4  -3  14   23.34    0.98
   4   3 -13    0.79    0.29
   4  -3 -13    0.76    0.25
   4  -3 -13    0.62    0.25
   4  -3 -13    0.75    0.26
  -4  -3  13    0.59    0.23
  -4  -3  13    0.73    0.15
   4   3 -12   21.64    1.87
   4  -3 -12   23.62    1.22
   4  -3 -12   21.08    1.77
   4  -3 -12   21.83    1.16
   4  -3 -12   21.97    1.24
   4   3 -12   24.09    1.44
  -4  -3  12   20.68    0.87
  -4  -3  12   21.42    1.30
  -4   3  12   20.92    1.30
   4  -3 -11   20.66    1.06
   4   3 -11   18.66    1.53
   4   3 -11   20.29    1.08
   4  -3 -11   19.88    0.96
   4  -3 -11   19.72    0.98
   4  -3 -11   17.57    1.53
   4   3 -11   18.04    0.77
  -4  -3  11   18.95    1.12
  -4  -3  11   19.75    0.76
  -4  -3  11   20.28    1.16
  -4   3  11   21.23    1.22
   4   3 -10   31.08    1.62
   4   3 -10   31.91    1.28
   4   3 -10   30.89    2.07
   4  -3 -10   31.22    2.08
   4  -3 -10   34.29    1.51
   4  -3 -10   31.42    1.25
   4  -3 -10   33.53    1.50
  -4  -3  10   31.27    1.52
  -4  -3  10   30.81    1.10
  -4  -3  10   33.24    1.23
  -4  -3  10   31.04    1.67
  -4  -3  10   31.95    1.67
  -4   3  10   33.52    1.52
   4   3  -9  146.96    8.33
   4   3  -9  153.43    7.96
   4   3  -9  148.74    7.26
   4  -3  -9  152.85    8.75
   4  -3  -9  151.04    7.39
   4  -3  -9  158.81    7.99
   4  -3  -9  157.68    8.15
  -4  -3   9  150.44    8.30
  -4  -3   9  157.59    7.72
  -4  -3   9  155.94    8.13
  -4  -3   9  145.49    6.94
  -4  -3   9  152.56    7.72
  -4   3   9  166.58    8.93
  -4   3   9  156.04    7.86
  -4   3   9  153.77    7.18
  -4   3   9  157.08    7.69
   4   3  -8    4.92    0.38
   4   3  -8    4.15    0.24
   4  -3  -8    5.31    0.41
   4  -3  -8    4.92    0.25
   4  -3  -8    4.58    0.28
  -4  -3   8    4.55    0.52
  -4  -3   8    4.43    0.23
  -4  -3   8    4.38    0.43
  -4  -3   8    4.79    0.30
  -4  -3   8    5.37    0.38
  -4   3   8    5.26    0.47
  -4   3   8    4.77    0.28
  -4   3   8    4.75    0.21
   4   3  -7   67.71    2.58
   4   3  -7   68.11    2.74
   4  -3  -7   72.48    2.94
   4  -3  -7   72.61    2.82
   4  -3  -7   75.23    2.90
   4  -3  -7   66.82    2.42
  -4  -3   7   70.79    2.71
  -4  -3   7   70.68    2.84
  -4  -3   7   67.97    2.54
  -4  -3   7   75.53    3.06
  -4  -3   7   73.65    3.49
  -4   3   7   71.34    2.77
  -4   3   7   68.26    2.51
   4   3  -6    0.93    0.10
   4  -3  -6    0.92    0.20
   4  -3  -6    0.79    0.08
   4  -3  -6    1.12    0.16
  -4  -3   6    1.29    0.13
  -4  -3   6    1.25    0.17
  -4   3   6    1.16    0.08
   4  -3  -5   24.24    1.02
   4  -3  -5   24.62    0.97
  -4  -3   5   24.83    1.02
  -4  -3   5   22.80    0.68
   4  -3  -4   25.57    1.17
   4  -3  -4   25.58    1.01
  -4  -3   4   22.76    1.05
   4  -3  -3   61.35    2.54
   4   3  -3   59.69    2.41
   4  -3  -3   63.88    2.50
  -4  -3   3   60.81    2.66
  -4  -3   3   57.02    2.46
  -4   3   3   56.75    1.80
   4   3  -2  148.43    7.10
   4  -3  -2  158.92    7.67
  -4   3   2  155.94    7.05
  -4  -3   2  158.26    7.81
  -4  -3   2  145.00    7.18
   4  -3  -1  265.72   15.06
  -4  -3   1  246.40   14.20
  -4  -3   1  269.22   15.79
  -4   3   1  265.62   14.66
   4  -3   0   56.08    2.27
  -4  -3   0   49.72    2.04
  -4   3   0   53.55    2.03
  -4  -3   0   50.73    2.42
   4   3   1   57.97    1.90
   4  -3   1   61.73    2.62
  -4  -3  -1   59.36    2.95
  -4  -3  -1   58.21    2.28
  -4   3  -1   61.66    2.57
   4   3   2   52.07    1.76
   4  -3   2   52.60    1.75
   4  -3   2   54.75    2.33
  -4  -3  -2   50.85    1.86
  -4  -3  -2   51.34    1.86
  -4  -3  -2   47.50    2.27
  -4   3  -2   50.12    2.16
  -4   3  -2   51.79    2.01
   4   3   3  206.16   10.59
   4  -3   3  213.32   10.80
   4  -3   3  209.93   11.68
   4  -3   3  200.95   10.29
  -4  -3  -3  208.33   12.08
  -4  -3  -3  212.15   11.07
  -4   3  -3  205.28   10.93
  -4   3  -3  201.92   11.32
   4   3   4   22.53    0.86
   4  -3   4   23.28    1.21
   4  -3   4   22.83    0.80
   4  -3   4   21.51    0.80
  -4  -3  -4   22.45    0.85
  -4  -3  -4   22.50    1.35
  -4  -3  -4   22.25    0.89
  -4   3  -4   23.97    1.17
  -4   3  -4   22.86    1.03
   4   3   5   13.07    0.38
   4   3   5   13.55    0.66
   4  -3   5   13.32    0.56
   4  -3   5   13.86    0.55
   4  -3   5   13.69    0.90
  -4  -3  -5   14.05    0.63
  -4  -3  -5   13.18    0.58
  -4  -3  -5   12.87    1.02
  -4   3  -5   13.30    0.84
  -4   3  -5   13.34    0.67
   4   3   6    7.34    0.52
   4   3   6    7.92    0.28
   4  -3   6    7.67    0.45
   4  -3   6    7.76    0.43
   4  -3   6    8.68    0.73
  -4  -3  -6    8.38    0.51
  -4  -3  -6    8.55    0.46
  -4  -3  -6    9.25    0.88
  -4   3  -6    7.33    0.65
  -4   3  -6    7.90    0.86
   4  -3   7    0.77    0.38
   4   3   7    0.93    0.13
   4  -3   7    1.11    0.21
   4   3   7    0.98    0.27
   4  -3   7    0.99    0.15
  -4  -3  -7    0.97    0.24
  -4  -3  -7    1.04    0.22
  -4  -3  -7    0.58    0.44
  -4   3  -7    1.08    0.35
  -4   3  -7    0.73    0.43
   4   3   8    0.87    0.32
   4   3   8    0.96    0.13
   4  -3   8    0.85    0.42
   4  -3   8    1.22    0.25
   4  -3   8    1.18    0.19
  -4  -3  -8    1.46    0.26
  -4  -3  -8    0.78    0.41
  -4  -3  -8    1.09    0.21
  -4   3  -8    0.86    0.40
  -4   3  -8    0.85    0.47
   4   3   9  122.38    5.80
   4  -3   9  123.17    6.27
   4  -3   9  112.59    5.33
   4   3   9  113.93    6.61
   4  -3   9  113.37    6.85
  -4  -3  -9  114.31    6.19
  -4  -3  -9  111.81    7.08
  -4  -3  -9  123.29    6.37
  -4   3  -9  125.59    7.21
  -4   3  -9  109.84    7.10
   4   3  10    6.01    0.38
   4  -3  10    5.99    0.52
  -4  -3 -10    6.80    0.53
  -4  -3 -10    6.51    0.52
  -4  -3 -10    6.16    0.60
  -4   3 -10    7.79    0.82
   4   3  11   16.53    0.70
   4  -3  11   17.28    0.88
  -4  -3 -11   17.73    1.00
  -4  -3 -11   16.22    0.79
  -4   3 -11   16.87    1.25
   4   3  12   11.43    0.47
   4  -3  12   13.10    0.61
  -4  -3 -12   11.48    0.64
  -4   3 -12   12.45    0.92
   4  -3  13    0.05    0.08
  -4   3 -13    0.28    0.15
   4   4 -16    8.70    0.56
   4  -4 -16    8.90    0.42
  -4   4  16    8.64    0.45
   4   4 -15    0.31    0.18
   4  -4 -15    0.23    0.17
  -4  -4  15    0.25    0.14
  -4   4  15    0.29    0.14
   4   4 -14    6.48    0.48
   4  -4 -14    5.81    0.44
   4  -4 -14    6.06    0.55
   4  -4 -14    7.27    0.57
  -4  -4  14    6.10    0.48
  -4  -4  14    5.64    0.33
   4   4 -13    1.10    0.29
   4  -4 -13    0.95    0.25
   4  -4 -13    0.91    0.24
   4  -4 -13    1.08    0.31
  -4  -4  13    1.15    0.28
  -4  -4  13    0.95    0.16
   4   4 -12    0.02    0.19
   4  -4 -12    0.06    0.12
   4  -4 -12    0.24    0.15
   4  -4 -12    0.06    0.16
   4  -4 -12    0.41    0.32
  -4  -4  12    0.12    0.09
  -4   4  12    0.04    0.19
  -4  -4  12    0.00    0.19
   4   4 -11   11.48    0.91
   4   4 -11   11.53    0.94
   4  -4 -11   12.70    1.20
   4   4 -11   12.40    0.85
   4  -4 -11   11.84    0.68
   4  -4 -11   11.83    0.62
   4  -4 -11   12.55    0.85
  -4  -4  11   11.14    0.47
  -4  -4  11   12.40    0.75
  -4   4  11   11.29    0.70
   4  -4 -10   25.49    1.09
   4   4 -10   25.15    1.48
   4   4 -10   26.08    1.34
   4  -4 -10   27.34    1.17
   4  -4 -10   28.57    1.31
   4  -4 -10   27.24    1.79
  -4  -4  10   27.03    1.04
  -4  -4  10   26.25    1.56
  -4  -4  10   24.44    0.86
  -4  -4  10   26.70    1.40
  -4  -4  10   26.34    1.24
  -4   4  10   25.81    1.38
   4   4  -9    0.95    0.26
   4   4  -9    1.19    0.39
   4  -4  -9    1.14    0.29
   4  -4  -9    0.86    0.43
   4  -4  -9    1.03    0.18
   4  -4  -9    1.35    0.21
  -4  -4   9    1.33    0.31
  -4  -4   9    1.49    0.19
  -4  -4   9    1.16    0.36
  -4  -4   9    1.00    0.27
  -4   4   9    1.26    0.31
  -4   4   9    1.21    0.10
  -4   4   9    1.37    0.19
   4   4  -8   24.09    1.22
   4  -4  -8   25.86    0.90
   4  -4  -8   27.09    0.92
   4  -4  -8   27.10    1.53
   4   4  -8   24.66    1.03
   4  -4  -8   28.26    1.10
  -4  -4   8   26.49    1.04
  -4  -4   8   26.62    1.42
  -4  -4   8   25.68    0.85
  -4  -4   8   23.91    1.08
  -4  -4   8   26.21    1.18
  -4   4   8   26.01    1.24
  -4   4   8   26.91    0.86
  -4   4   8   24.93    0.89
   4   4  -7   10.45    0.37
   4  -4  -7   12.19    0.60
   4  -4  -7   11.43    0.40
   4  -4  -7   12.82    0.59
   4   4  -7   11.64    0.50
   4  -4  -7   11.52    0.45
  -4  -4   7   10.91    0.38
  -4  -4   7   11.79    0.43
  -4  -4   7   10.98    0.51
  -4  -4   7   11.27    0.69
  -4  -4   7   12.34    0.60
  -4   4   7   11.11    0.44
  -4   4   7   10.77    0.40
   4   4  -6   22.45    0.76
   4  -4  -6   23.15    0.75
   4  -4  -6   22.24    0.63
   4  -4  -6   23.51    0.87
   4  -4  -6   23.74    1.07
  -4  -4   6   24.56    0.83
  -4  -4   6   22.56    0.75
  -4  -4   6   23.46    1.24
  -4  -4   6   23.05    0.83
  -4  -4   6   22.81    0.80
  -4   4   6   23.17    0.78
   4  -4  -5    0.76    0.19
   4  -4  -5    0.82    0.08
   4  -4  -5    0.56    0.07
  -4  -4   5    0.71    0.24
  -4  -4   5    0.88    0.10
  -4  -4   5    0.86    0.12
  -4  -4   5    0.77    0.08
  -4  -4   5    0.47    0.09
   4  -4  -4   11.68    0.64
   4  -4  -4   10.59    0.50
  -4  -4   4   10.51    0.59
  -4  -4   4   10.81    0.35
   4  -4  -3   11.81    0.63
   4  -4  -3   12.00    0.68
  -4  -4   3   12.08    0.78
  -4  -4   3   12.33    0.76
   4   4  -2   18.14    0.74
   4  -4  -2   18.62    0.79
  -4  -4   2   17.63    0.82
  -4  -4   2   18.26    0.98
  -4   4   2   18.38    0.57
   4   4  -1  111.77    4.95
   4  -4  -1  124.25    5.76
  -4  -4   1  110.60    5.26
  -4  -4   1  116.77    5.80
  -4   4   1  122.58    5.26
   4  -4   0   42.00    1.84
  -4  -4   0   43.73    2.16
  -4   4   0   38.81    1.48
  -4  -4   0   37.49    1.63
   4   4   1  417.30   26.20
   4  -4   1  426.61   28.67
   4  -4   1  389.74   25.31
  -4  -4  -1  402.12   27.00
  -4  -4  -1  414.24   27.05
  -4  -4  -1  409.75   28.39
  -4  -4  -1  421.39   27.36
  -4   4  -1  428.68   28.76
   4   4   2   36.32    1.14
   4  -4   2   37.46    1.58
   4  -4   2   36.48    1.23
   4  -4   2   35.11    1.18
  -4  -4  -2   34.81    1.83
  -4  -4  -2   33.93    1.30
  -4  -4  -2   34.49    1.20
  -4  -4  -2   34.78    1.29
  -4   4  -2   32.57    1.51
  -4   4  -2   34.24    1.35
   4   4   3   10.12    0.38
   4  -4   3    9.75    0.27
   4  -4   3   10.15    0.46
   4  -4   3   11.15    0.78
   4  -4   3   10.67    0.38
  -4  -4  -3   10.11    0.51
  -4  -4  -3   10.67    0.43
  -4  -4  -3   12.05    0.82
  -4   4  -3   10.18    0.57
  -4   4  -3   10.55    0.61
   4   4   4    8.28    0.39
   4  -4   4    8.22    0.34
   4  -4   4    7.76    0.41
   4  -4   4    9.23    0.68
  -4  -4  -4    7.76    0.40
  -4  -4  -4    8.35    0.63
  -4   4  -4    7.90    0.53
  -4   4  -4    7.63    0.66
   4  -4   5   10.96    0.55
   4  -4   5   11.71    0.73
   4  -4   5   11.00    0.56
   4   4   5   12.13    0.57
  -4  -4  -5   11.35    0.98
  -4  -4  -5   11.91    0.66
  -4   4  -5   10.97    0.86
  -4   4  -5   11.09    0.63
   4   4   6    0.18    0.06
   4   4   6    0.13    0.14
   4  -4   6    0.34    0.14
   4  -4   6    0.14    0.24
   4  -4   6    0.22    0.14
  -4  -4  -6    0.35    0.18
  -4  -4  -6    0.40    0.28
  -4  -4  -6    0.12    0.13
  -4   4  -6    0.38    0.21
  -4   4  -6    0.07    0.27
   4   4   7   14.43    0.50
   4   4   7   13.46    0.81
   4  -4   7   11.87    1.08
   4  -4   7   13.76    0.60
   4  -4   7   13.77    0.77
  -4  -4  -7   13.59    0.86
  -4  -4  -7   12.61    1.26
  -4  -4  -7   14.05    0.70
  -4   4  -7   12.76    1.24
  -4   4  -7   14.47    0.86
   4   4   8   14.20    0.53
   4  -4   8   14.96    1.23
   4  -4   8   15.78    0.85
   4  -4   8   14.39    0.74
  -4  -4  -8   14.53    1.36
  -4  -4  -8   14.82    0.99
  -4  -4  -8   14.64    0.82
  -4   4  -8   15.19    1.19
  -4   4  -8   14.00    1.12
   4   4   9    0.69    0.14
   4  -4   9    0.83    0.16
   4  -4   9    0.37    0.34
   4  -4   9    0.72    0.24
  -4  -4  -9    0.26    0.49
  -4  -4  -9    0.68    0.28
  -4  -4  -9    0.41    0.21
  -4   4  -9    0.31    0.39
  -4   4  -9    0.84    0.29
   4   4  10   17.66    0.69
   4  -4  10   18.73    0.96
   4  -4  10   16.79    0.68
  -4  -4 -10   17.56    1.06
  -4  -4 -10   18.88    0.91
  -4   4 -10   19.92    1.29
   4   4  11    0.23    0.08
   4  -4  11    0.30    0.12
  -4   4 -11    0.32    0.20
  -4  -4 -11    0.23    0.19
   4  -4  12    1.57    0.22
  -4  -4 -12    1.79    0.25
  -4   4 -12    1.86    0.34
  -4   4 -13   -0.09    0.14
   4   5 -16    0.10    0.11
   4  -5 -16    0.04    0.08
  -4   5  16    0.06    0.08
   4   5 -15    0.09    0.13
   4  -5 -15    0.08    0.14
  -4  -5  15    0.11    0.12
   4   5 -14    1.00    0.28
   4  -5 -14    1.52    0.23
   4  -5 -14    1.33    0.29
  -4  -5  14    1.08    0.28
   4   5 -13    0.06    0.17
   4  -5 -13    0.20    0.16
   4  -5 -13    0.18    0.16
  -4  -5  13    0.18    0.14
   4  -5 -12    9.03    0.53
   4  -5 -12    8.54    0.54
   4  -5 -12    7.22    0.73
   4   5 -12    7.79    0.63
  -4  -5  12    9.27    0.71
  -4   5  12    8.12    0.63
   4   5 -11    0.12    0.17
   4  -5 -11    0.03    0.28
   4  -5 -11    0.41    0.22
   4  -5 -11    0.26    0.15
   4  -5 -11    0.21    0.18
   4   5 -11    0.86    0.27
  -4  -5  11    0.22    0.23
  -4   5  11    0.35    0.22
   4   5 -10    1.32    0.36
   4   5 -10    0.90    0.19
   4  -5 -10    0.63    0.26
   4  -5 -10    0.65    0.16
   4  -5 -10    0.88    0.17
   4  -5 -10    0.47    0.32
  -4  -5  10    0.70    0.16
  -4  -5  10    0.57    0.35
  -4  -5  10    0.48    0.23
  -4   5  10    0.67    0.23
   4   5  -9    0.37    0.26
   4   5  -9    0.16    0.13
   4  -5  -9    0.34    0.11
   4  -5  -9    0.25    0.12
   4  -5  -9    0.38    0.20
   4  -5  -9    0.05    0.23
  -4  -5   9    0.37    0.20
  -4  -5   9    0.26    0.14
  -4   5   9    0.25    0.07
  -4   5   9    0.60    0.17
  -4  -5   9    0.24    0.26
   4   5  -8   14.95    0.97
   4  -5  -8   15.49    1.09
   4  -5  -8   15.02    0.53
   4  -5  -8   16.41    0.83
   4  -5  -8   14.97    0.63
   4  -5  -8   15.75    0.61
   4   5  -8   14.00    0.66
  -4  -5   8   14.75    0.57
  -4  -5   8   15.54    0.70
  -4  -5   8   15.80    0.81
  -4  -5   8   14.51    1.03
  -4   5   8   15.67    0.58
   4   5  -7   24.56    1.25
   4   5  -7   24.12    0.93
   4  -5  -7   25.86    0.92
   4  -5  -7   24.20    0.86
   4  -5  -7   26.16    1.30
   4  -5  -7   30.39    1.17
  -4  -5   7   25.60    1.48
  -4  -5   7   26.19    1.04
  -4  -5   7   24.35    0.95
  -4  -5   7   25.94    1.01
   4  -5  -6   23.01    0.87
   4  -5  -6   21.25    0.59
   4  -5  -6   22.39    0.73
   4  -5  -6   21.09    0.71
   4  -5  -6   21.95    1.13
   4   5  -6   20.39    0.71
  -4  -5   6   20.65    1.10
  -4   5   6   20.16    0.70
  -4  -5   6   21.41    0.86
  -4  -5   6   21.54    0.77
  -4  -5   6   21.04    0.78
   4  -5  -5    1.69    0.23
   4  -5  -5    1.58    0.11
   4  -5  -5    1.30    0.12
   4  -5  -5    1.36    0.15
  -4  -5   5    1.65    0.17
  -4  -5   5    1.85    0.18
  -4  -5   5    1.38    0.15
  -4   5   5    1.27    0.15
  -4  -5   5    1.32    0.35
   4  -5  -4    7.41    0.46
   4  -5  -4    6.63    0.23
   4  -5  -4    6.24    0.22
   4  -5  -4    7.53    0.43
  -4  -5   4    6.18    0.57
  -4  -5   4    6.71    0.30
  -4  -5   4    6.80    0.33
  -4  -5   4    6.34    0.28
   4  -5  -3    3.38    0.17
   4  -5  -3    3.56    0.40
   4  -5  -3    3.39    0.14
   4  -5  -3    3.35    0.32
  -4  -5   3    4.00    0.45
  -4  -5   3    3.66    0.17
  -4  -5   3    3.17    0.19
  -4  -5   3    3.32    0.35
   4  -5  -2   37.68    1.70
   4  -5  -2   41.03    1.29
   4  -5  -2   37.65    1.22
   4  -5  -2   37.86    1.15
  -4  -5   2   37.41    1.21
  -4  -5   2   37.97    1.21
  -4  -5   2   35.42    1.63
  -4  -5   2   37.42    1.62
  -4   5   2   37.41    1.21
   4   5  -1   55.24    2.10
   4  -5  -1   60.19    1.98
   4  -5  -1   58.55    2.03
   4  -5  -1   59.03    2.62
   4  -5  -1   57.52    2.01
   4  -5  -1   55.43    1.83
  -4  -5   1   54.69    2.50
  -4  -5   1   60.36    2.85
  -4   5   1   57.53    2.10
  -4  -5   1   61.95    2.15
   4   5   0    1.37    0.15
   4  -5   0    1.37    0.10
   4  -5   0    1.58    0.10
   4  -5   0    1.53    0.15
   4  -5   0    2.11    0.31
   4  -5   0    1.76    0.14
  -4  -5   0    1.75    0.34
  -4  -5   0    1.51    0.27
  -4  -5   0    1.59    0.16
  -4   5   0    2.00    0.20
   4  -5   1    6.82    0.23
   4  -5   1    7.01    0.28
   4  -5   1    7.10    0.27
   4  -5   1    6.89    0.22
   4  -5   1    7.74    0.61
  -4  -5  -1    7.65    0.36
  -4  -5  -1    7.45    0.65
  -4   5  -1    6.87    0.37
  -4   5  -1    7.72    0.43
  -4  -5  -1    7.00    0.35
  -4  -5  -1    7.45    0.50
   4  -5   2   40.64    1.25
   4  -5   2   44.60    1.58
   4  -5   2   41.86    1.31
   4  -5   2   44.87    2.15
   4  -5   2   43.12    1.59
  -4  -5  -2   44.66    1.59
  -4  -5  -2   42.61    2.25
  -4  -5  -2   41.64    1.73
  -4   5  -2   42.31    1.73
  -4   5  -2   44.41    1.91
  -4  -5  -2   41.92    1.63
   4   5   3   25.03    0.85
   4  -5   3   25.54    0.98
   4  -5   3   25.66    0.95
   4  -5   3   25.34    1.42
   4  -5   3   24.80    0.72
  -4   5  -3   25.25    1.29
  -4   5  -3   25.06    1.08
  -4  -5  -3   25.22    1.03
  -4  -5  -3   26.30    0.96
  -4  -5  -3   25.11    1.48
   4   5   4   27.00    0.98
   4  -5   4   26.71    0.78
   4  -5   4   26.47    1.08
   4  -5   4   27.22    1.56
   4  -5   4   27.66    1.09
  -4  -5  -4   27.81    1.13
  -4  -5  -4   26.54    1.63
  -4  -5  -4   31.62    1.30
  -4   5  -4   27.05    1.13
  -4   5  -4   27.54    1.31
   4   5   5    0.21    0.13
   4  -5   5    0.37    0.25
   4  -5   5    0.16    0.14
   4  -5   5    0.33    0.14
  -4  -5  -5    0.25    0.17
  -4   5  -5    0.09    0.19
  -4   5  -5    0.14    0.23
  -4  -5  -5    0.04    0.26
  -4  -5  -5    0.23    0.15
   4  -5   6    0.01    0.13
   4  -5   6    0.12    0.13
   4  -5   6   -0.02    0.23
  -4  -5  -6   -0.01    0.14
  -4  -5  -6    0.01    0.24
  -4  -5  -6    0.08    0.16
  -4   5  -6    0.25    0.15
  -4   5  -6    0.34    0.24
   4   5   7    0.05    0.05
   4  -5   7    0.10    0.11
   4  -5   7    0.03    0.13
   4  -5   7    0.15    0.23
  -4  -5  -7   -0.01    0.13
  -4  -5  -7    0.04    0.26
  -4   5  -7    0.06    0.19
  -4   5  -7    0.23    0.24
  -4  -5  -7    0.16    0.16
   4   5   8    2.76    0.18
   4  -5   8    2.57    0.63
   4  -5   8    2.80    0.33
   4  -5   8    2.80    0.36
  -4  -5  -8    2.73    0.35
  -4   5  -8    2.43    0.68
  -4   5  -8    3.11    0.51
  -4  -5  -8    2.01    0.33
  -4  -5  -8    2.19    0.71
   4   5   9   18.22    0.66
   4  -5   9   17.29    0.71
   4  -5   9   19.27    0.87
  -4  -5  -9   19.55    0.97
  -4   5  -9   18.61    1.23
  -4  -5  -9   17.42    1.09
   4  -5  10    3.16    0.27
   4  -5  10    3.19    0.38
  -4  -5 -10    3.23    0.43
  -4   5 -10    3.67    0.51
  -4  -5 -10    3.97    0.32
   4  -5  11    0.32    0.16
  -4  -5 -11    0.31    0.19
  -4   5 -11    0.41    0.23
   4  -5  12    1.86    0.20
  -4   5 -12    1.59    0.30
  -4  -5 -12    1.63    0.25
   4  -6 -16    1.01    0.17
  -4   6  16    0.69    0.13
   4   6 -15    4.67    0.38
   4  -6 -15    5.48    0.44
  -4  -6  15    5.45    0.38
   4   6 -14    0.90    0.22
   4  -6 -14    0.93    0.25
  -4  -6  14    0.85    0.24
   4   6 -13    0.22    0.12
   4  -6 -13   -0.02    0.15
   4  -6 -13    0.19    0.16
  -4  -6  13    0.11    0.17
   4  -6 -12    4.86    0.44
   4  -6 -12    5.52    0.48
   4   6 -12    4.45    0.45
  -4  -6  12    5.92    0.55
   4  -6 -11    2.75    0.56
   4  -6 -11    2.74    0.30
   4  -6 -11    2.65    0.32
   4   6 -11    2.18    0.32
  -4  -6  11    2.57    0.42
  -4   6  11    1.78    0.39
  -4  -6  11    1.70    0.23
   4   6 -10    3.76    0.31
   4  -6 -10    3.27    0.29
   4  -6 -10    3.53    0.44
   4  -6 -10    2.92    0.65
  -4  -6  10    2.76    0.62
  -4  -6  10    3.22    0.31
  -4  -6  10    3.53    0.47
  -4   6  10    3.14    0.40
   4  -6  -9    1.99    0.26
   4  -6  -9    0.47    0.37
   4  -6  -9    0.96    0.18
   4   6  -9    0.63    0.21
  -4  -6   9    0.66    0.39
  -4  -6   9    0.72    0.21
  -4   6   9    0.76    0.11
  -4   6   9    1.16    0.30
  -4  -6   9    0.91    0.28
   4   6  -8   25.54    1.51
   4   6  -8   26.55    1.10
   4  -6  -8   28.14    1.06
   4  -6  -8   30.47    1.34
   4  -6  -8   25.93    1.58
   4  -6  -8   27.57    1.26
  -4  -6   8   27.84    1.69
  -4  -6   8   28.54    1.34
  -4   6   8   26.60    0.97
  -4  -6   8   27.53    1.04
  -4  -6   8   29.58    1.23
   4   6  -7    2.93    0.23
   4   6  -7    2.70    0.40
   4  -6  -7    3.23    0.21
   4  -6  -7    3.45    0.15
   4  -6  -7    3.08    0.26
   4  -6  -7    3.92    0.44
   4  -6  -7    3.39    0.45
  -4  -6   7    3.31    0.36
  -4  -6   7    3.58    0.30
  -4  -6   7    3.64    0.27
  -4  -6   7    3.29    0.45
   4   6  -6   36.68    1.35
   4  -6  -6   42.12    1.83
   4  -6  -6   43.41    1.60
   4  -6  -6   39.42    1.42
   4  -6  -6   42.54    1.38
   4   6  -6   38.28    1.72
  -4  -6   6   41.98    1.66
  -4  -6   6   41.35    1.52
  -4  -6   6   40.18    1.54
  -4  -6   6   41.26    2.24
   4  -6  -5    3.71    0.46
   4  -6  -5    3.64    0.20
   4  -6  -5    4.07    0.23
   4  -6  -5    3.57    0.23
  -4  -6   5    3.93    0.43
  -4  -6   5    4.01    0.22
  -4  -6   5    3.40    0.24
  -4  -6   5    3.68    0.26
  -4   6   5    3.65    0.21
   4  -6  -4    6.33    0.21
   4  -6  -4    6.98    0.47
   4  -6  -4    6.14    0.27
   4  -6  -4    6.05    0.25
   4  -6  -4    6.48    0.44
  -4  -6   4    6.19    0.29
  -4  -6   4    6.09    0.30
  -4  -6   4    7.29    0.35
  -4  -6   4    5.58    0.51
   4  -6  -3    8.11    0.30
   4  -6  -3    7.36    0.30
   4  -6  -3    7.11    0.65
   4  -6  -3    7.43    0.47
   4  -6  -3    7.53    0.20
   4  -6  -3    7.08    0.32
  -4  -6   3    6.99    0.31
  -4  -6   3    7.91    0.55
  -4  -6   3    7.10    0.32
   4  -6  -2  172.04    9.30
   4  -6  -2  164.99    7.54
   4  -6  -2  168.02    7.92
   4  -6  -2  168.58    8.05
   4  -6  -2  160.49    7.47
  -4  -6   2  170.67    8.11
  -4  -6   2  173.95    8.47
  -4  -6   2  167.60    9.00
  -4  -6   2  166.01    8.73
   4  -6  -1   28.47    0.94
   4  -6  -1   28.91    1.41
   4  -6  -1   26.75    0.90
   4  -6  -1   27.08    0.85
   4  -6  -1   26.34    0.77
  -4  -6   1   27.90    1.50
  -4  -6   1   25.71    1.33
  -4  -6   1   28.04    0.94
  -4  -6   1   26.63    0.93
  -4   6   1   25.95    0.94
   4  -6   0   31.10    0.96
   4  -6   0   31.80    1.08
   4  -6   0   32.52    1.10
   4  -6   0   33.49    1.63
   4  -6   0   31.81    1.00
  -4  -6   0   31.95    1.17
  -4  -6   0   30.86    1.69
  -4  -6   0   32.53    1.15
  -4  -6   0   30.33    1.42
  -4   6   0   26.90    1.03
  -4   6   0   31.27    1.18
  -4  -6   0   30.27    1.02
   4  -6   1    1.84    0.12
   4  -6   1    2.10    0.14
   4  -6   1    1.84    0.19
   4  -6   1    2.19    0.40
   4  -6   1    2.23    0.19
  -4  -6  -1    1.96    0.21
  -4  -6  -1    1.73    0.17
  -4  -6  -1    2.29    0.41
  -4  -6  -1    2.10    0.21
  -4  -6  -1    1.76    0.33
  -4   6  -1    1.92    0.25
  -4   6  -1    1.80    0.22
   4  -6   2   21.28    1.29
   4  -6   2   20.17    0.60
   4  -6   2   20.22    0.79
   4  -6   2   20.14    0.78
   4  -6   2   20.60    0.65
  -4  -6  -2   19.05    0.97
  -4  -6  -2   19.90    0.82
  -4  -6  -2   21.05    0.86
  -4  -6  -2   19.32    1.23
  -4   6  -2   18.59    0.85
  -4   6  -2   21.53    1.04
   4  -6   3   47.00    1.57
   4  -6   3   45.48    1.46
   4  -6   3   48.00    2.45
   4  -6   3   45.87    1.82
   4  -6   3   47.71    1.86
  -4  -6  -3   45.10    2.22
  -4  -6  -3   47.19    1.78
  -4  -6  -3   47.97    1.83
  -4   6  -3   47.71    2.27
  -4   6  -3   46.56    2.00
   4  -6   4    3.35    0.54
   4  -6   4    3.79    0.31
   4  -6   4    3.31    0.16
   4  -6   4    3.07    0.34
  -4  -6  -4    2.74    0.60
  -4  -6  -4    3.44    0.36
  -4  -6  -4    3.29    0.28
  -4   6  -4    3.10    0.39
  -4   6  -4    3.02    0.49
   4  -6   5    1.10    0.36
   4  -6   5    0.97    0.17
   4  -6   5    0.85    0.23
  -4  -6  -5    0.70    0.25
  -4  -6  -5    0.63    0.42
  -4  -6  -5    0.71    0.21
  -4   6  -5    0.84    0.28
  -4   6  -5    1.02    0.23
   4  -6   6   -0.06    0.20
   4  -6   6    0.07    0.13
   4  -6   6    0.03    0.10
  -4  -6  -6    0.05    0.24
  -4  -6  -6    0.04    0.11
  -4  -6  -6    0.02    0.14
  -4   6  -6   -0.04    0.16
  -4   6  -6    0.10    0.16
   4  -6   7    3.98    0.71
   4  -6   7    4.96    0.45
   4  -6   7    4.46    0.44
  -4  -6  -7    5.18    0.51
  -4  -6  -7    4.44    0.39
  -4   6  -7    3.80    0.76
  -4   6  -7    4.46    0.58
  -4  -6  -7    3.30    0.84
   4  -6   8    0.82    0.24
   4  -6   8    1.04    0.18
   4  -6   8    0.48    0.46
  -4  -6  -8    0.71    0.21
  -4  -6  -8    0.94    0.28
  -4   6  -8    0.75    0.31
  -4   6  -8    0.67    0.40
   4  -6   9   12.26    0.71
   4  -6   9   11.71    0.63
  -4  -6  -9   11.81    0.63
  -4  -6  -9   12.72    0.73
  -4   6  -9   11.40    0.94
   4  -6  10    3.90    0.31
   4  -6  10    4.26    0.32
  -4  -6 -10    4.10    0.37
  -4   6 -10    4.15    0.52
   4  -6  11    2.98    0.18
   4  -6  11    3.59    0.31
  -4  -6 -11    3.36    0.31
  -4   6 -11    2.87    0.42
   4  -6  12    0.01    0.07
  -4  -6 -12   -0.20    0.09
  -4   6 -12    0.36    0.11
   4   7 -15    0.01    0.10
   4  -7 -15   -0.05    0.09
  -4  -7  15    0.11    0.07
   4   7 -14    0.17    0.15
   4  -7 -14    0.29    0.19
   4  -7 -14    0.26    0.18
  -4  -7  14    0.35    0.13
   4   7 -13    2.62    0.35
   4  -7 -13    4.37    0.37
   4  -7 -13    3.54    0.36
  -4  -7  13    2.96    0.43
   4   7 -12    2.30    0.31
   4  -7 -12    2.58    0.34
   4  -7 -12    3.19    0.42
  -4  -7  12    3.35    0.43
   4  -7 -11   -0.04    0.19
   4  -7 -11    0.31    0.14
   4   7 -11    0.03    0.14
  -4  -7  11    0.09    0.16
  -4   7  11    0.26    0.20
  -4  -7  11    0.07    0.10
   4   7 -10   12.94    0.62
   4  -7 -10   15.46    0.67
   4  -7 -10   15.58    0.92
  -4  -7  10   15.26    1.02
  -4  -7  10   13.65    1.37
  -4  -7  10   15.46    0.75
  -4   7  10   14.99    0.87
   4   7  -9    4.01    0.32
   4  -7  -9    4.39    0.41
   4  -7  -9    3.56    0.34
  -4  -7   9    3.99    0.38
  -4  -7   9    3.58    0.67
  -4  -7   9    4.91    0.47
  -4   7   9    3.75    0.51
  -4   7   9    3.61    0.21
   4   7  -8    4.82    0.35
   4  -7  -8    4.20    0.51
   4  -7  -8    5.54    0.41
   4  -7  -8    4.59    0.34
  -4  -7   8    5.12    0.41
  -4  -7   8    6.98    0.59
  -4  -7   8    4.71    0.37
  -4  -7   8    4.88    0.39
  -4   7   8    5.14    0.32
   4  -7  -7    1.29    0.33
   4  -7  -7    1.10    0.13
   4  -7  -7    1.14    0.20
   4  -7  -7    1.27    0.19
  -4  -7   7    1.36    0.23
  -4  -7   7    1.13    0.42
  -4  -7   7    1.24    0.25
  -4  -7   7    0.91    0.26
   4  -7  -6   18.94    0.58
   4  -7  -6   18.02    0.65
   4  -7  -6   19.65    1.02
   4  -7  -6   19.62    0.77
  -4  -7   6   18.81    0.87
  -4  -7   6   19.13    1.36
  -4  -7   6   18.71    0.86
  -4  -7   6   19.31    0.91
   4  -7  -5    7.20    0.38
   4  -7  -5    7.60    0.33
   4  -7  -5    6.83    0.66
   4  -7  -5    7.43    0.34
  -4  -7   5    6.26    0.67
  -4  -7   5    6.71    0.39
  -4  -7   5    7.45    0.40
  -4  -7   5    7.58    0.44
   4  -7  -4   29.29    0.98
   4  -7  -4   29.30    0.98
   4  -7  -4   29.81    1.53
  -4  -7   4   30.49    1.11
  -4  -7   4   29.07    1.04
  -4  -7   4   29.24    1.53
  -4  -7   4   27.73    1.00
   4  -7  -3    0.20    0.10
   4  -7  -3   -0.03    0.20
   4  -7  -3    0.02    0.14
   4  -7  -3    0.18    0.06
   4  -7  -3    0.17    0.08
  -4  -7   3    0.03    0.21
  -4  -7   3    0.19    0.10
  -4  -7   3    0.08    0.11
   4  -7  -2    2.90    0.17
   4  -7  -2    3.17    0.19
   4  -7  -2    4.41    0.45
   4  -7  -2    2.57    0.32
   4  -7  -2    2.91    0.19
   4  -7  -2    3.10    0.16
  -4  -7   2    2.86    0.26
  -4  -7   2    3.22    0.26
  -4  -7   2    3.08    0.46
   4  -7  -1    0.70    0.21
   4  -7  -1    0.55    0.08
   4  -7  -1    0.62    0.12
   4  -7  -1    0.61    0.10
   4  -7  -1    0.73    0.11
  -4  -7   1    0.59    0.27
  -4  -7   1    0.57    0.15
  -4  -7   1    0.61    0.14
  -4  -7   1    0.62    0.12
  -4  -7   1    0.62    0.29
  -4   7   1    0.32    0.14
   4  -7   0    4.88    0.24
   4  -7   0    4.88    0.29
   4  -7   0    4.95    0.21
   4  -7   0    5.80    0.58
   4  -7   0    5.13    0.25
  -4  -7   0    5.07    0.29
  -4  -7   0    4.92    0.34
  -4  -7   0    5.30    0.53
  -4  -7   0    5.00    0.60
  -4  -7   0    4.90    0.28
  -4   7   0    5.26    0.35
   4  -7   1    5.56    0.29
   4  -7   1    5.46    0.29
   4  -7   1    5.45    0.22
   4  -7   1    5.90    0.51
   4  -7   1    5.16    0.24
  -4  -7  -1    5.40    0.65
  -4  -7  -1    5.23    0.51
  -4  -7  -1    5.83    0.37
  -4  -7  -1    4.99    0.27
  -4  -7  -1    6.27    0.35
  -4   7  -1    4.78    0.37
  -4   7  -1    5.33    0.42
   4  -7   2   32.42    1.30
   4  -7   2   32.99    1.22
   4  -7   2   31.51    1.02
   4  -7   2   30.86    1.05
   4  -7   2   32.99    1.88
  -4  -7  -2   31.24    1.63
  -4  -7  -2   30.66    1.51
  -4  -7  -2   34.01    1.25
  -4  -7  -2   32.33    1.23
  -4   7  -2   28.94    1.23
  -4   7  -2   31.29    1.51
   4  -7   3    5.00    0.39
   4  -7   3    4.83    0.26
   4  -7   3    5.07    0.21
   4  -7   3    5.44    0.34
   4  -7   3    6.34    0.68
  -4  -7  -3    4.76    0.40
  -4  -7  -3    4.38    0.70
  -4   7  -3    4.43    0.41
  -4   7  -3    5.09    0.56
  -4  -7  -3    5.19    0.40
   4  -7   4    6.23    0.40
   4  -7   4    5.84    0.26
   4  -7   4    6.21    0.65
   4  -7   4    6.08    0.39
  -4  -7  -4    5.52    0.41
  -4  -7  -4    5.53    0.79
  -4  -7  -4    5.52    0.44
  -4   7  -4    5.26    0.42
  -4   7  -4    6.36    0.65
   4  -7   5   69.54    3.67
   4  -7   5   69.55    3.18
   4  -7   5   70.41    2.60
   4  -7   5   67.29    2.94
  -4  -7  -5   69.37    3.05
  -4  -7  -5   64.35    2.90
  -4  -7  -5   62.98    3.54
  -4   7  -5   66.31    3.31
  -4   7  -5   67.36    3.67
   4  -7   6    1.11    0.40
   4  -7   6    1.39    0.30
   4  -7   6    1.72    0.33
  -4  -7  -6    1.47    0.20
  -4  -7  -6    1.38    0.27
  -4  -7  -6    0.71    0.54
  -4   7  -6    1.49    0.38
  -4   7  -6    1.21    0.47
   4  -7   7   19.44    0.92
   4  -7   7   19.61    0.90
   4  -7   7   18.50    1.37
  -4  -7  -7   18.30    0.92
  -4  -7  -7   19.48    1.10
  -4   7  -7   19.82    1.21
  -4   7  -7   19.68    1.54
   4  -7   8    1.25    0.25
   4  -7   8    1.10    0.24
  -4  -7  -8    1.02    0.25
  -4  -7  -8    0.94    0.21
  -4   7  -8    1.25    0.30
   4  -7   9    0.12    0.11
   4  -7   9    0.11    0.13
  -4  -7  -9    0.02    0.17
  -4   7  -9    0.09    0.17
   4  -7  10    2.08    0.23
   4  -7  10    2.30    0.29
  -4  -7 -10    2.29    0.38
  -4   7 -10    2.03    0.34
   4  -7  11    0.84    0.11
   4  -7  11    1.01    0.18
  -4  -7 -11    1.03    0.24
  -4   7 -11    1.04    0.23
   4  -7  12    0.12    0.09
  -4  -7 -12    0.21    0.09
   4  -8 -15    0.01    0.09
  -4  -8  15    0.07    0.08
   4  -8 -14    0.95    0.21
   4  -8 -14    0.41    0.16
  -4  -8  14    0.83    0.20
   4   8 -13    0.12    0.12
   4  -8 -13    0.19    0.17
   4  -8 -13    0.16    0.14
  -4  -8  13    0.23    0.17
   4   8 -12    9.47    0.58
   4  -8 -12   12.08    0.70
   4  -8 -12   12.81    0.80
  -4  -8  12   13.02    0.76
   4   8 -11    5.29    0.41
   4  -8 -11    7.75    0.51
   4  -8 -11    7.13    0.48
  -4  -8  11    7.49    0.67
  -4  -8  11    6.82    0.40
   4  -8 -10    1.33    0.23
   4  -8 -10    1.13    0.23
  -4  -8  10    0.95    0.23
  -4  -8  10    0.56    0.55
  -4   8  10    0.91    0.35
  -4  -8  10    1.28    0.35
   4  -8  -9    6.98    0.39
   4  -8  -9    7.12    0.52
  -4  -8   9    6.93    0.55
  -4  -8   9    5.42    0.97
  -4  -8   9    7.07    0.65
  -4   8   9    6.37    0.55
  -4   8   9    7.20    0.34
   4  -8  -8    0.97    0.19
   4  -8  -8    0.63    0.25
   4  -8  -8    0.91    0.21
  -4  -8   8    1.11    0.36
  -4  -8   8    0.98    0.19
  -4  -8   8    1.06    0.21
  -4  -8   8    1.04    0.27
   4  -8  -7    6.47    0.70
   4  -8  -7    6.99    0.44
   4  -8  -7    6.99    0.33
   4  -8  -7    6.50    0.41
  -4  -8   7    7.50    0.53
  -4  -8   7    7.17    0.53
  -4  -8   7    6.79    0.56
  -4  -8   7    6.78    0.85
   4  -8  -6    1.42    0.21
   4  -8  -6    1.35    0.14
   4  -8  -6    1.12    0.18
   4  -8  -6    1.61    0.38
  -4  -8   6    1.44    0.47
  -4  -8   6    1.51    0.23
  -4  -8   6    1.33    0.24
  -4  -8   6    1.30    0.21
   4  -8  -5    1.80    0.23
   4  -8  -5    1.80    0.40
   4  -8  -5    1.46    0.15
  -4  -8   5    1.38    0.22
  -4  -8   5    1.98    0.26
  -4  -8   5    1.68    0.49
  -4  -8   5    1.49    0.30
   4  -8  -4   14.41    0.64
   4  -8  -4   12.89    0.44
   4  -8  -4   13.61    1.02
  -4  -8   4   13.29    0.53
  -4  -8   4   14.56    1.11
  -4  -8   4   14.36    0.75
  -4  -8   4   14.24    0.70
   4  -8  -3    3.24    0.23
   4  -8  -3    3.63    0.28
   4  -8  -3    3.16    0.22
   4  -8  -3    3.47    0.22
   4  -8  -3    3.33    0.55
  -4  -8   3    3.63    0.47
  -4  -8   3    4.60    0.35
   4  -8  -2    0.33    0.25
   4  -8  -2    0.26    0.13
   4  -8  -2    0.43    0.09
   4  -8  -2    0.20    0.10
   4  -8  -2    0.21    0.09
  -4  -8   2    0.43    0.15
  -4  -8   2    0.19    0.21
  -4  -8   2    0.25    0.15
   4  -8  -1    4.44    0.25
   4  -8  -1    4.25    0.22
   4  -8  -1    4.48    0.61
   4  -8  -1    4.38    0.33
   4  -8  -1    4.85    0.29
  -4  -8   1    4.78    0.37
  -4  -8   1    4.39    0.60
  -4  -8   1    4.55    0.29
   4  -8   0    0.13    0.09
   4  -8   0    0.18    0.12
   4  -8   0    0.02    0.24
   4  -8   0    0.18    0.09
   4  -8   0    0.07    0.10
  -4  -8   0   -0.02    0.20
  -4  -8   0    0.09    0.22
  -4  -8   0    0.31    0.11
  -4  -8   0    0.17    0.11
  -4   8   0    0.31    0.14
   4  -8   1   15.15    0.69
   4  -8   1   14.90    0.58
   4  -8   1   14.85    0.61
   4  -8   1   14.41    1.16
   4  -8   1   14.24    0.55
  -4  -8  -1   15.41    0.64
  -4  -8  -1   13.90    1.16
  -4  -8  -1   14.46    0.63
  -4  -8  -1   13.80    0.57
  -4   8  -1   14.67    0.79
  -4  -8  -1   13.96    0.92
   4  -8   2   25.97    1.15
   4  -8   2   25.37    0.98
   4  -8   2   24.91    0.85
   4  -8   2   24.68    1.68
   4  -8   2   24.70    0.80
  -4  -8  -2   25.82    1.11
  -4  -8  -2   22.18    1.42
  -4  -8  -2   24.42    1.31
  -4  -8  -2   25.66    1.00
  -4   8  -2   25.14    1.32
   4  -8   3   19.15    0.84
   4  -8   3   18.75    0.72
   4  -8   3   19.67    0.97
   4  -8   3   19.14    0.66
   4  -8   3   18.19    1.20
  -4  -8  -3   18.37    0.90
  -4  -8  -3   19.00    0.94
  -4  -8  -3   16.95    1.39
  -4   8  -3   17.16    0.89
  -4   8  -3   18.96    1.19
   4  -8   4   31.64    1.14
   4  -8   4   30.71    0.99
   4  -8   4   31.57    1.48
   4  -8   4   32.15    1.54
   4  -8   4   30.72    2.10
  -4  -8  -4   28.06    2.04
  -4  -8  -4   28.97    1.33
  -4  -8  -4   29.72    1.44
  -4   8  -4   26.68    1.31
  -4   8  -4   32.60    1.85
   4  -8   5   16.74    0.61
   4  -8   5   17.29    0.88
   4  -8   5   17.71    1.52
   4  -8   5   17.57    0.98
  -4  -8  -5   15.52    0.80
  -4  -8  -5   16.71    1.02
  -4  -8  -5   16.09    1.43
  -4   8  -5   15.01    0.93
  -4   8  -5   16.22    1.32
   4  -8   6    0.77    0.23
   4  -8   6    0.63    0.25
   4  -8   6    0.60    0.44
  -4  -8  -6    0.78    0.21
  -4  -8  -6    0.46    0.15
  -4   8  -6    0.54    0.25
  -4   8  -6    0.53    0.38
   4  -8   7    0.70    0.23
   4  -8   7    0.70    0.18
  -4  -8  -7    0.63    0.18
  -4  -8  -7    0.75    0.26
  -4   8  -7    0.57    0.23
   4  -8   8    0.27    0.13
   4  -8   8    0.27    0.17
  -4  -8  -8    0.32    0.17
  -4   8  -8    0.10    0.19
   4  -8   9    0.20    0.16
   4  -8   9    0.25    0.14
  -4  -8  -9    0.12    0.19
  -4   8  -9    0.20    0.17
   4  -8  10   -0.01    0.09
   4  -8  10    0.03    0.08
  -4  -8 -10   -0.07    0.13
  -4   8 -10    0.12    0.11
   4  -8  11    3.92    0.26
   4  -8  11    3.43    0.17
  -4  -8 -11    1.71    0.33
   4  -9 -14    0.97    0.19
   4  -9 -14    0.82    0.16
  -4  -9  14    1.57    0.21
   4  -9 -13    0.79    0.18
   4  -9 -13    0.93    0.18
  -4  -9  13    1.11    0.27
   4  -9 -12    0.05    0.11
   4  -9 -12    0.07    0.10
  -4  -9  12    0.05    0.13
   4  -9 -11    4.49    0.40
   4  -9 -11    4.54    0.42
  -4  -9  11    4.42    0.31
  -4  -9  11    4.65    0.43
   4  -9 -10    0.17    0.11
   4  -9 -10    0.20    0.14
  -4  -9  10    0.05    0.13
  -4  -9  10    0.13    0.20
   4  -9  -9    3.11    0.35
   4  -9  -9    2.88    0.36
  -4  -9   9    4.48    0.39
  -4  -9   9    3.91    0.39
  -4   9   9    2.95    0.53
  -4   9   9    3.43    0.23
  -4  -9   9    2.23    0.74
   4  -9  -8   10.94    0.52
   4  -9  -8   10.68    0.83
   4  -9  -8   11.51    0.60
  -4  -9   8   11.28    0.63
  -4  -9   8   10.90    1.24
  -4  -9   8   11.53    0.76
  -4  -9   8   11.13    0.69
   4  -9  -7    0.20    0.15
   4  -9  -7    0.26    0.11
   4  -9  -7    0.05    0.12
   4  -9  -7    0.14    0.19
  -4  -9   7    0.31    0.15
  -4  -9   7   -0.01    0.33
  -4  -9   7    0.18    0.21
  -4  -9   7    0.42    0.18
   4  -9  -6   -0.02    0.13
   4  -9  -6    0.15    0.10
   4  -9  -6    0.06    0.23
  -4  -9   6    0.07    0.13
  -4  -9   6    0.23    0.29
  -4  -9   6    0.19    0.18
  -4  -9   6    0.22    0.11
   4  -9  -5    3.03    0.44
   4  -9  -5    3.18    0.22
   4  -9  -5    2.98    0.26
  -4  -9   5    3.69    0.42
  -4  -9   5    3.63    0.68
  -4  -9   5    2.79    0.31
  -4  -9   5    2.94    0.29
   4  -9  -4    7.90    0.50
   4  -9  -4    7.07    0.32
   4  -9  -4    7.39    0.74
  -4  -9   4    7.29    0.75
  -4  -9   4    7.94    0.54
  -4  -9   4    8.59    0.52
   4  -9  -3   21.44    0.89
   4  -9  -3   23.12    0.78
   4  -9  -3   22.51    0.80
   4  -9  -3   22.87    1.31
   4  -9  -3   23.86    0.83
  -4  -9   3   22.82    1.10
  -4  -9   3   22.78    1.60
  -4  -9   3   24.59    1.04
   4  -9  -2    2.49    0.26
   4  -9  -2    2.98    0.26
   4  -9  -2    3.13    0.25
   4  -9  -2    3.55    0.56
   4  -9  -2    3.28    0.27
  -4  -9   2    3.07    0.36
  -4  -9   2    3.28    0.35
  -4  -9   2    2.56    0.61
   4  -9  -1   24.84    1.43
   4  -9  -1   24.78    0.96
   4  -9  -1   25.63    0.89
   4  -9  -1   24.18    0.93
  -4  -9   1   24.67    1.11
  -4  -9   1   22.15    1.53
  -4  -9   1   24.51    1.01
   4  -9   0    0.62    0.17
   4  -9   0    0.62    0.16
   4  -9   0    0.82    0.29
   4  -9   0    0.62    0.17
   4  -9   0    0.71    0.13
  -4  -9   0    0.64    0.18
  -4  -9   0    0.74    0.32
  -4  -9   0    0.61    0.16
   4  -9   1    4.64    0.31
   4  -9   1    4.57    0.33
   4  -9   1    4.40    0.72
   4  -9   1    4.36    0.39
   4  -9   1    4.85    0.44
  -4  -9  -1    4.93    0.58
  -4  -9  -1    4.93    0.42
  -4  -9  -1    4.81    0.70
  -4  -9  -1    4.32    0.28
   4  -9   2   18.70    1.00
   4  -9   2   13.12    1.40
   4  -9   2   18.76    0.72
   4  -9   2   19.28    0.96
   4  -9   2   19.04    0.76
  -4  -9  -2   18.22    0.81
  -4  -9  -2   18.06    1.50
  -4  -9  -2   17.36    0.82
  -4   9  -2   18.72    1.15
   4  -9   3    1.21    0.23
   4  -9   3    1.44    0.30
   4  -9   3    1.15    0.16
   4  -9   3    1.31    0.20
   4  -9   3    0.86    0.49
  -4  -9  -3    1.21    0.24
  -4  -9  -3    1.13    0.20
  -4  -9  -3    0.73    0.49
  -4   9  -3    0.99    0.37
   4  -9   4   14.99    0.89
   4  -9   4   14.70    0.51
   4  -9   4   14.34    0.78
   4  -9   4   12.59    1.29
   4  -9   4   14.80    0.63
  -4  -9  -4   13.76    1.30
  -4  -9  -4   13.20    0.72
  -4  -9  -4   14.86    0.82
  -4   9  -4   14.97    1.17
   4  -9   5   18.90    0.90
   4  -9   5   17.49    0.69
   4  -9   5   18.90    1.04
   4  -9   5   16.60    1.28
  -4  -9  -5   18.00    1.02
  -4  -9  -5   16.61    0.83
  -4   9  -5   17.22    1.21
   4  -9   6    8.76    0.66
   4  -9   6    8.73    0.66
   4  -9   6    8.81    0.28
  -4  -9  -6    8.91    0.56
  -4  -9  -6    8.53    0.48
  -4   9  -6    8.44    0.57
   4  -9   7    1.28    0.27
   4  -9   7    1.62    0.23
  -4  -9  -7    1.44    0.32
  -4   9  -7    1.14    0.27
   4  -9   8    0.02    0.12
   4  -9   8    0.07    0.11
  -4  -9  -8    0.06    0.12
  -4   9  -8    0.05    0.12
   4  -9   9    3.83    0.28
   4  -9   9    4.74    0.38
  -4  -9  -9    4.27    0.43
   4  -9  10    0.82    0.17
   4  -9  10    0.84    0.15
  -4  -9 -10    0.66    0.21
   4 -10 -13    8.87    0.48
   4 -10 -13    7.01    0.44
  -4 -10  13    8.35    0.57
   4 -10 -12    1.09    0.22
   4 -10 -12    1.32    0.17
  -4 -10  12    1.09    0.29
   4 -10 -11   13.86    0.71
   4 -10 -11   14.45    0.65
  -4 -10  11   13.08    0.56
  -4 -10  11   14.27    0.90
   4 -10 -10   11.12    0.64
   4 -10 -10    9.31    0.52
  -4 -10  10   10.14    0.47
  -4 -10  10   10.34    0.76
   4 -10  -9   24.24    1.10
   4 -10  -9   23.49    1.02
  -4 -10   9   24.12    1.14
  -4 -10   9   23.96    1.33
   4 -10  -8    1.56    0.26
   4 -10  -8    1.21    0.30
  -4 -10   8    1.28    0.59
  -4 -10   8    1.41    0.31
  -4 -10   8    1.39    0.32
   4 -10  -7   11.91    0.45
   4 -10  -7   11.56    0.67
   4 -10  -7   11.73    0.92
  -4 -10   7   11.69    0.86
  -4 -10   7   10.66    1.30
  -4 -10   7   11.68    0.76
  -4 -10   7   11.43    0.74
   4 -10  -6   58.09    2.37
   4 -10  -6   48.09    2.78
   4 -10  -6   54.87    2.48
  -4 -10   6   51.12    2.29
  -4 -10   6   48.26    3.34
  -4 -10   6   54.55    2.66
  -4 -10   6   55.91    2.83
   4 -10  -5   10.57    0.54
   4 -10  -5   10.40    0.64
   4 -10  -5   10.27    0.75
  -4 -10   5    9.62    0.77
  -4 -10   5   10.08    0.58
  -4 -10   5    9.21    0.51
  -4 -10   5    9.87    1.21
   4 -10  -4    1.74    0.22
   4 -10  -4    1.65    0.18
   4 -10  -4    2.06    0.36
  -4 -10   4    1.33    0.47
  -4 -10   4    1.95    0.31
  -4 -10   4    2.33    0.29
   4 -10  -3    1.31    0.17
   4 -10  -3    1.11    0.19
   4 -10  -3    1.29    0.32
  -4 -10   3    0.83    0.29
  -4 -10   3    0.77    0.46
  -4 -10   3    0.93    0.21
   4 -10  -2   11.74    0.72
   4 -10  -2   11.44    1.05
   4 -10  -2   12.01    0.52
   4 -10  -2   11.71    0.49
   4 -10  -2   11.67    0.59
  -4 -10   2   12.41    0.72
  -4 -10   2   11.18    1.13
  -4 -10   2   12.84    0.78
   4 -10  -1   59.81    2.51
   4 -10  -1   56.03    2.58
   4 -10  -1   55.67    2.93
   4 -10  -1   58.24    2.29
   4 -10  -1   56.71    2.30
  -4 -10   1   59.53    2.72
  -4 -10   1   55.75    3.31
  -4 -10   1   55.07    2.50
   4 -10   0   16.14    1.48
   4 -10   0   17.24    0.78
   4 -10   0   17.26    0.73
   4 -10   0   18.02    1.09
   4 -10   0   17.56    0.90
  -4 -10   0   17.10    0.99
  -4 -10   0   15.96    1.30
  -4 -10   0   15.74    0.88
   4 -10   1  179.91    9.59
   4 -10   1  170.17   10.20
   4 -10   1  174.86    8.97
   4 -10   1  180.89    9.44
   4 -10   1  177.92    9.14
  -4 -10  -1  164.97    8.68
  -4 -10  -1  161.70    9.71
  -4 -10  -1  177.49    9.66
   4 -10   2   15.31    1.10
   4 -10   2   15.69    0.78
   4 -10   2   15.07    0.96
   4 -10   2   15.04    0.84
   4 -10   2   16.43    1.42
  -4 -10  -2   13.97    0.89
   4 -10   3   44.70    2.81
   4 -10   3   45.16    1.65
   4 -10   3   47.14    2.02
   4 -10   3   46.75    2.34
   4 -10   3   46.77    2.25
  -4 -10  -3   45.18    1.95
  -4 -10  -3   43.37    1.99
   4 -10   4    8.84    0.77
   4 -10   4   10.04    0.41
   4 -10   4   10.15    1.17
   4 -10   4    9.80    0.75
   4 -10   4   10.26    0.52
  -4 -10  -4    9.38    0.57
  -4 -10  -4   10.05    0.61
  -4  10  -4    9.94    1.06
   4 -10   5    0.13    0.17
   4 -10   5    0.15    0.15
   4 -10   5    0.10    0.08
  -4 -10  -5    0.11    0.12
  -4 -10  -5    0.20    0.14
   4 -10   6    1.85    0.24
   4 -10   6    1.29    0.32
  -4 -10  -6    1.18    0.22
   4 -10   7    7.54    0.46
   4 -10   7    7.35    0.46
  -4 -10  -7    7.31    0.55
   4 -10   8    0.03    0.12
   4 -10   8    0.01    0.09
  -4 -10  -8    0.14    0.10
   4 -10   9    1.46    0.22
   4 -10   9    1.36    0.20
  -4 -10  -9    1.13    0.24
   4 -10  10    5.46    0.30
   4 -10  10    4.94    0.27
   4 -11 -12    1.96    0.24
  -4 -11  12    1.69    0.23
   4 -11 -11    0.29    0.11
  -4 -11  11    0.22    0.18
   4 -11 -10    0.15    0.10
  -4 -11  10    0.07    0.09
  -4 -11  10    0.04    0.16
   4 -11  -9    6.22    0.44
  -4 -11   9    5.72    0.44
  -4 -11   9    5.90    0.54
   4 -11  -8    8.70    0.53
  -4 -11   8    9.13    0.62
  -4 -11   8    9.33    0.52
  -4  11   8    7.91    0.42
   4 -11  -7    0.85    0.16
   4 -11  -7    0.68    0.14
  -4 -11   7    0.82    0.25
  -4 -11   7    0.42    0.22
  -4 -11   7    0.75    0.20
   4 -11  -6   23.63    0.93
   4 -11  -6   23.64    1.00
   4 -11  -6   23.30    1.50
  -4 -11   6   23.34    1.15
  -4 -11   6   24.20    2.11
  -4 -11   6   23.17    1.02
  -4 -11   6   23.96    1.14
   4 -11  -5    0.20    0.26
   4 -11  -5    0.33    0.13
   4 -11  -5    0.28    0.14
  -4 -11   5    0.22    0.38
  -4 -11   5    0.21    0.16
  -4 -11   5    0.11    0.22
   4 -11  -4    9.05    0.52
   4 -11  -4    8.74    0.71
   4 -11  -4    8.97    0.48
  -4 -11   4    8.80    0.94
  -4 -11   4    8.87    0.60
  -4 -11   4    9.65    0.67
   4 -11  -3    4.03    0.37
   4 -11  -3    4.18    0.62
   4 -11  -3    4.27    0.44
  -4 -11   3    4.05    0.37
  -4 -11   3    3.35    0.81
  -4 -11   3    3.70    0.49
   4 -11  -2    9.06    0.48
   4 -11  -2   10.02    0.73
   4 -11  -2    9.12    0.61
   4 -11  -2    8.14    0.96
  -4 -11   2    9.34    0.71
  -4 -11   2   10.16    1.16
  -4 -11   2    9.20    0.74
   4 -11  -1   63.84    2.81
   4 -11  -1   64.99    2.71
   4 -11  -1   63.18    2.60
   4 -11  -1   59.41    3.59
   4 -11  -1   64.88    3.16
  -4 -11   1   64.69    3.08
  -4 -11   1   61.33    2.76
  -4 -11   1   59.16    3.67
   4 -11   0    6.12    0.65
   4 -11   0    4.62    0.45
   4 -11   0    4.36    0.39
   4 -11   0    4.82    0.38
   4 -11   0    4.46    0.44
  -4 -11   0    5.10    0.50
  -4 -11   0    4.94    0.77
  -4 -11   0    4.01    0.36
   4 -11   1   14.86    1.18
   4 -11   1   16.10    0.91
   4 -11   1   15.35    0.80
   4 -11   1   15.81    0.86
   4 -11   1   15.63    0.91
  -4 -11  -1   13.84    0.72
  -4 -11  -1   14.27    0.87
   4 -11   2    4.90    0.87
   4 -11   2    5.67    0.57
   4 -11   2    5.11    0.38
   4 -11   2    5.01    0.48
   4 -11   2    4.77    0.38
  -4 -11  -2    4.59    0.43
   4 -11   3   50.09    2.36
   4 -11   3   52.37    2.01
   4 -11   3   50.21    2.25
   4 -11   3   51.49    2.12
  -4 -11  -3   46.67    2.03
   4 -11   4    4.40    0.23
   4 -11   4    5.04    0.40
   4 -11   4    4.71    0.39
   4 -11   4    4.07    0.29
  -4 -11  -4    4.61    0.33
   4 -11   5    1.39    0.13
   4 -11   5    2.06    0.31
   4 -11   5    1.71    0.30
   4 -11   6    0.17    0.13
   4 -11   6    0.32    0.18
  -4 -11  -6    0.16    0.14
   4 -11   7   17.82    0.90
   4 -11   7   17.76    0.94
  -4 -11  -7   16.67    0.80
   4 -11   8   -0.00    0.12
   4 -11   8   -0.02    0.12
  -4 -11  -8    0.23    0.09
   4 -11   9    0.02    0.07
   4 -11   9    0.03    0.07
   4 -12 -11    2.81    0.24
  -4 -12  11    2.85    0.23
   4 -12 -10    3.88    0.26
  -4 -12  10    3.48    0.25
  -4 -12  10    3.49    0.28
   4 -12  -9    0.53    0.15
  -4 -12   9    0.13    0.12
  -4 -12   9    0.53    0.17
   4 -12  -8    0.38    0.12
  -4 -12   8    0.44    0.18
  -4 -12   8    0.38    0.16
  -4  12   8    0.34    0.10
   4 -12  -7    7.14    0.44
   4 -12  -7    6.85    0.29
  -4 -12   7    6.65    0.55
   4 -12  -6    4.80    0.32
   4 -12  -6    5.06    0.28
  -4 -12   6    5.46    0.50
  -4 -12   6    4.98    0.41
   4 -12  -5    2.68    0.29
   4 -12  -5    2.93    0.32
  -4 -12   5    2.65    0.39
  -4 -12   5    3.31    0.40
   4 -12  -4    0.38    0.19
   4 -12  -4    0.40    0.17
  -4 -12   4    0.60    0.20
  -4 -12   4    0.54    0.23
   4 -12  -3   38.42    2.49
   4 -12  -3   43.06    1.94
   4 -12  -3   42.68    1.66
  -4 -12   3   41.36    2.11
  -4 -12   3   41.95    2.00
   4 -12  -2    3.40    0.76
   4 -12  -2    3.48    0.48
   4 -12  -2    4.50    0.40
  -4 -12   2    4.04    0.49
  -4 -12   2    4.63    0.35
  -4 -12   2    2.00    0.82
   4 -12  -1    1.05    0.25
   4 -12  -1    1.16    0.39
   4 -12  -1    1.05    0.26
   4 -12  -1    1.07    0.20
  -4 -12   1    0.96    0.27
  -4 -12   1    1.06    0.23
  -4 -12   1    0.47    0.43
   4 -12   0   76.64    3.35
   4 -12   0   72.61    3.07
   4 -12   0   71.85    3.29
  -4 -12   0   66.20    2.89
  -4 -12   0   72.00    3.39
   4 -12   1   20.64    0.88
   4 -12   1   21.53    0.87
   4 -12   1   20.98    1.22
   4 -12   1   19.91    0.83
  -4 -12  -1   18.97    0.99
  -4 -12  -1   18.20    0.83
   4 -12   2   44.33    2.17
   4 -12   2   42.00    1.63
   4 -12   2   46.08    1.67
   4 -12   2   43.76    1.76
  -4 -12  -2   41.64    1.79
   4 -12   3    1.94    0.21
   4 -12   3    2.01    0.14
   4 -12   3    2.79    0.33
   4 -12   3    2.65    0.30
  -4 -12  -3    1.81    0.23
   4 -12   4    3.23    0.19
   4 -12   4    3.49    0.35
   4 -12   4    3.26    0.31
   4 -12   4    3.18    0.19
   4 -12   5   13.66    0.66
   4 -12   5   13.40    0.77
   4 -12   6    0.07    0.12
   4 -12   6    0.13    0.10
   4 -12   7    0.78    0.19
   4 -12   7    0.79    0.18
   4 -12   8   -0.00    0.06
   4 -12   8    0.03    0.08
   4 -13 -10    0.02    0.05
   4 -13  -9    1.96    0.16
  -4 -13   9    1.53    0.19
   4 -13  -8    0.08    0.09
  -4 -13   8   -0.02    0.09
   4 -13  -7    3.31    0.28
  -4 -13   7    3.90    0.34
  -4  13   7    2.63    0.23
   4 -13  -6    0.13    0.12
   4 -13  -6    0.11    0.08
  -4 -13   6    0.22    0.16
   4 -13  -5    8.48    0.43
   4 -13  -5    8.09    0.43
  -4 -13   5    8.62    0.59
  -4 -13   5    9.21    0.55
   4 -13  -4    1.29    0.22
   4 -13  -4    1.05    0.20
  -4 -13   4    1.37    0.31
  -4 -13   4    1.06    0.26
   4 -13  -3    0.16    0.09
   4 -13  -3   -0.03    0.10
  -4 -13   3   -0.03    0.15
  -4 -13   3    0.20    0.16
   4 -13  -2   10.12    0.64
   4 -13  -2   11.60    0.58
  -4 -13   2   10.20    0.69
  -4 -13   2   10.81    0.67
   4 -13  -1   10.79    0.56
   4 -13  -1   10.40    0.55
  -4 -13   1   10.30    0.63
  -4 -13   1    9.32    0.45
  -4 -13   1   10.44    0.65
   4 -13   0    2.07    0.17
   4 -13   0    1.39    0.28
  -4 -13   0    1.51    0.25
  -4 -13   0    1.42    0.24
   4 -13   1    0.22    0.11
   4 -13   1    0.35    0.13
   4 -13   1    0.21    0.11
  -4 -13  -1    0.21    0.11
  -4 -13  -1    0.16    0.12
   4 -13   2    0.17    0.18
   4 -13   2    0.20    0.14
   4 -13   2    0.19    0.11
  -4 -13  -2    0.96    0.13
   4 -13   3    5.74    0.39
   4 -13   3    5.70    0.36
   4 -13   3    6.02    0.28
   4 -13   4    0.99    0.10
   4 -13   4    1.15    0.21
   4 -13   4    1.29    0.20
   4 -13   5    0.25    0.13
   4 -13   5    0.26    0.14
   4 -13   6    3.20    0.21
   4 -13   6    3.17    0.23
   4 -13   7    1.59    0.15
   4 -13   7    1.11    0.16
   4 -14  -9    0.11    0.07
  -4 -14   9    0.13    0.08
   4 -14  -8    0.97    0.15
  -4 -14   8    1.51    0.17
  -4 -14   8    1.13    0.18
   4 -14  -7    0.57    0.10
  -4 -14   7    0.83    0.16
  -4  14   7    0.61    0.10
   4 -14  -6    1.58    0.19
  -4 -14   6    1.74    0.21
   4 -14  -5    7.96    0.41
   4 -14  -5    7.89    0.38
  -4 -14   5    9.08    0.60
   4 -14  -4    2.65    0.25
   4 -14  -4    2.13    0.23
  -4 -14   4    3.09    0.34
   4 -14  -3    0.35    0.11
   4 -14  -3    0.33    0.14
  -4 -14   3    0.49    0.18
  -4 -14   3    0.35    0.15
  -4 -14   3    0.29    0.14
   4 -14  -2    0.16    0.10
  -4 -14   2    0.03    0.13
  -4 -14   2    0.16    0.11
  -4 -14   2    0.01    0.09
   4 -14  -1    1.70    0.20
  -4 -14   1    1.83    0.22
  -4 -14   1    1.35    0.24
   4 -14   0    0.06    0.08
   4 -14   0   -0.02    0.08
  -4 -14   0    0.02    0.08
  -4 -14   0    0.22    0.09
   4 -14   1    2.42    0.20
   4 -14   1    2.71    0.22
   4 -14   2    0.80    0.17
   4 -14   2    0.95    0.12
   4 -14   3    5.38    0.22
   4 -14   3    5.16    0.30
   4 -14   3    5.33    0.31
   4 -14   4    0.16    0.08
   4 -14   4    0.06    0.09
   4 -14   5   27.06    1.01
  -4 -15   7    2.55    0.20
  -4 -15   7    2.43    0.19
   4 -15  -6    2.86    0.17
  -4 -15   6    3.03    0.22
  -4 -15   6    3.13    0.23
  -4  15   6    2.25    0.13
   4 -15  -5    3.32    0.21
  -4 -15   5    3.54    0.30
  -4 -15   5    3.69    0.26
   4 -15  -4    0.06    0.07
   4 -15  -4    0.01    0.07
  -4 -15   4    0.14    0.08
  -4 -15   4    0.01    0.08
   4 -15  -3    0.12    0.10
   4 -15  -3    0.15    0.10
  -4 -15   3    0.12    0.10
  -4 -15   3    0.37    0.09
   4 -15  -2    2.71    0.20
   4 -15  -2    2.09    0.16
  -4 -15   2    2.52    0.26
   4 -15  -1    0.49    0.12
   4 -15  -1    0.57    0.09
  -4 -15   1    0.51    0.13
   4 -15   0    0.11    0.09
   4 -15   0    0.16    0.09
  -4 -15   0    0.64    0.09
   4 -15   1    0.59    0.13
   4 -15   1    0.60    0.10
   4 -15   2    0.52    0.08
   4 -15   2    0.61    0.12
   4 -15   3    2.63    0.18
   4 -16  -2    0.76    0.10
   4 -16  -1    0.57    0.09
   5   0 -17    0.39    0.16
   5   0 -16    1.41    0.18
   5   0 -16    1.34    0.22
  -5   0  16    0.76    0.15
   5   0 -15   -0.01    0.09
   5   0 -15   -0.00    0.14
  -5   0  15   -0.02    0.07
   5   0 -14    7.55    0.53
   5   0 -14    8.66    0.77
  -5   0  14    7.21    0.42
  -5   0  14    7.20    0.46
   5   0 -13    0.09    0.15
   5   0 -13    0.67    0.29
   5   0 -13    0.04    0.16
  -5   0  13    0.10    0.10
  -5   0  13    0.13    0.12
   5   0 -12    0.18    0.33
   5   0 -12    0.20    0.15
   5   0 -12   -0.12    0.21
   5   0 -12    0.21    0.11
  -5   0  12    0.01    0.19
  -5   0  12    0.10    0.16
   5   0 -11    0.01    0.15
   5   0 -11    0.01    0.14
   5   0 -11    0.04    0.24
   5   0 -11    0.11    0.12
  -5   0  11    0.24    0.15
  -5   0  11    0.22    0.13
   5   0 -10   14.16    1.29
   5   0 -10   14.68    0.85
   5   0 -10   13.91    0.73
   5   0 -10   13.33    0.54
  -5   0  10   14.97    0.86
  -5   0  10   14.72    0.78
  -5   0  10   14.01    0.74
  -5   0  10   13.85    0.52
   5   0  -9    0.08    0.12
   5   0  -9    0.17    0.06
   5   0  -9   -0.04    0.11
  -5   0   9    0.10    0.12
  -5   0   9    0.02    0.13
  -5   0   9   -0.02    0.07
  -5   0   9    0.07    0.10
   5   0  -8    3.38    0.13
   5   0  -8    2.63    0.26
   5   0  -8    2.95    0.29
  -5   0   8    4.16    0.29
  -5   0   8    2.62    0.33
  -5   0   8    2.55    0.19
  -5   0   8    3.75    0.24
   5   0  -7    0.43    0.14
   5   0  -7    0.36    0.12
  -5   0   7    0.60    0.11
  -5   0   7    0.24    0.14
  -5   0   7    0.46    0.13
  -5   0   7    0.27    0.08
   5   0  -6   27.66    0.99
   5   0  -6   29.56    0.97
  -5   0   6   27.72    1.05
  -5   0   6   32.46    1.23
  -5   0   6   27.32    0.85
  -5   0   6   30.54    1.02
   5   0  -5   -0.06    0.19
   5   0  -5    0.10    0.08
  -5   0   5    0.42    0.14
  -5   0   5    0.28    0.06
  -5   0   5    0.13    0.09
   5   0  -4  173.18    8.09
   5   0  -4  178.81    9.39
  -5   0   4  180.42    9.06
  -5   0   4  193.22    9.90
   5   0  -3    2.07    0.11
  -5   0   3    2.11    0.32
  -5   0   3    2.32    0.26
   5   0  -2  317.43   18.21
  -5   0   2  330.26   20.04
  -5   0   2  305.50   18.95
   5   0  -1    0.68    0.10
  -5   0   1    0.73    0.22
  -5   0   1    0.57    0.15
   5   0   0   36.21    1.20
  -5   0   0   36.30    1.69
  -5   0   0   36.33    1.25
   5   0   1    0.51    0.12
  -5   0  -1    0.41    0.10
  -5   0  -1    0.55    0.17
  -5   0  -1    0.38    0.13
  -5   0  -1    0.38    0.11
   5   0   2   29.71    1.14
  -5   0  -2   28.06    0.97
  -5   0  -2   32.99    1.02
  -5   0  -2   28.35    1.52
  -5   0  -2   29.37    1.19
   5   0   3   -0.03    0.04
   5   0   3    0.03    0.04
   5   0   3    0.11    0.08
  -5   0  -3    0.11    0.08
  -5   0  -3    0.01    0.13
  -5   0  -3    0.04    0.10
   5   0   4   13.72    0.42
   5   0   4   14.32    0.75
  -5   0  -4   12.56    1.06
  -5   0  -4   13.71    0.66
  -5   0  -4   13.33    0.61
   5   0   5    0.23    0.08
   5   0   5    0.33    0.18
  -5   0  -5    0.15    0.12
  -5   0  -5    0.21    0.22
  -5   0  -5    0.19    0.18
   5   0   6   20.69    0.79
   5   0   6   20.36    1.21
  -5   0  -6   18.70    1.50
  -5   0  -6   22.00    1.28
  -5   0  -6   19.49    1.00
   5   0   7    0.24    0.24
   5   0   7    0.30    0.10
  -5   0  -7    0.21    0.19
  -5   0  -7   -0.03    0.35
  -5   0  -7    0.08    0.26
   5   0   8   18.07    0.70
   5   0   8   17.48    1.34
  -5   0  -8   16.80    0.95
  -5   0  -8   17.52    1.66
  -5   0  -8   19.39    1.30
   5   0   9    0.11    0.12
  -5   0  -9    0.20    0.12
  -5   0  -9    0.10    0.24
   5   0  10    1.43    0.22
  -5   0 -10    1.75    0.25
  -5   0 -10    2.11    0.42
   5   0  11    0.03    0.08
  -5   0 -11    0.03    0.15
   5   0  12    0.48    0.11
  -5   0 -12    0.63    0.21
  -5   0 -12    0.80    0.15
   5   1 -17    0.80    0.21
   5   1 -16    0.25    0.17
   5  -1 -16    0.23    0.15
   5  -1 -16    0.12    0.09
  -5   1  16    0.17    0.09
   5   1 -15   -0.00    0.09
   5   1 -15    0.01    0.12
   5  -1 -15    0.07    0.11
   5  -1 -15    0.05    0.14
  -5  -1  15    0.13    0.07
  -5  -1  15   -0.02    0.09
  -5   1  15   -0.01    0.07
   5   1 -14    2.95    0.32
   5  -1 -14    3.04    0.31
   5  -1 -14    2.85    0.48
   5   1 -14    2.97    0.53
  -5  -1  14    3.17    0.24
  -5  -1  14    3.21    0.27
  -5   1  14    2.33    0.27
   5   1 -13    3.37    0.38
   5   1 -13    5.42    0.92
   5   1 -13    4.58    0.56
   5  -1 -13    2.97    0.75
   5  -1 -13    4.80    0.44
   5  -1 -13    4.29    0.32
   5  -1 -13    3.95    0.37
  -5  -1  13    3.33    0.44
  -5  -1  13    4.53    0.27
  -5   1  13    2.60    0.59
  -5   1  13    3.73    0.35
   5  -1 -12    2.18    0.39
   5   1 -12    2.46    0.26
   5   1 -12    4.21    0.67
   5  -1 -12    1.74    0.66
   5  -1 -12    2.15    0.44
   5  -1 -12    2.65    0.33
   5   1 -12    2.22    0.46
  -5  -1  12    2.57    0.21
  -5  -1  12    2.61    0.31
  -5   1  12    2.25    0.32
  -5   1  12    2.08    0.31
   5   1 -11   -0.10    0.12
   5   1 -11    0.11    0.16
   5   1 -11    0.04    0.24
   5  -1 -11    0.06    0.14
   5  -1 -11    0.03    0.15
   5  -1 -11    0.09    0.10
   5  -1 -11    0.08    0.21
  -5  -1  11   -0.02    0.13
  -5  -1  11    0.02    0.08
  -5  -1  11    0.15    0.15
  -5   1  11    0.07    0.13
  -5   1  11    0.13    0.14
   5   1 -10    0.81    0.34
   5   1 -10    0.70    0.25
   5   1 -10    0.81    0.20
   5  -1 -10    0.71    0.18
   5  -1 -10    0.82    0.42
   5  -1 -10    0.87    0.23
   5  -1 -10    0.80    0.11
  -5  -1  10    0.96    0.28
  -5  -1  10    0.94    0.13
  -5  -1  10    0.81    0.25
  -5   1  10    0.82    0.22
  -5   1  10    0.61    0.11
  -5   1  10    0.40    0.21
  -5   1  10    0.73    0.22
   5   1  -9    1.33    0.20
   5   1  -9    1.28    0.20
   5  -1  -9    1.01    0.12
   5  -1  -9    1.21    0.19
   5  -1  -9    1.35    0.24
  -5  -1   9    1.39    0.24
  -5  -1   9    1.20    0.13
  -5  -1   9    1.23    0.20
  -5   1   9    1.01    0.21
  -5   1   9    1.30    0.23
  -5   1   9    1.25    0.24
  -5   1   9    1.08    0.13
  -5  -1   9    1.28    0.25
   5  -1  -8   13.31    0.40
   5   1  -8   13.00    0.60
   5   1  -8   13.86    0.58
   5  -1  -8   13.36    0.56
   5  -1  -8   13.68    0.68
  -5  -1   8   13.67    0.66
  -5  -1   8   14.36    0.81
  -5  -1   8   13.02    0.49
  -5  -1   8   13.60    0.60
  -5   1   8   14.15    0.57
  -5   1   8   14.48    0.63
  -5   1   8   14.74    0.74
  -5   1   8   14.55    0.49
   5   1  -7    0.45    0.10
   5   1  -7    0.53    0.15
   5  -1  -7    0.47    0.12
   5  -1  -7    0.62    0.14
  -5   1   7    0.93    0.15
  -5  -1   7    0.59    0.16
  -5  -1   7    0.57    0.22
  -5  -1   7    0.46    0.11
  -5  -1   7    0.62    0.11
  -5   1   7    0.64    0.15
  -5   1   7    0.49    0.09
  -5   1   7    0.37    0.18
   5   1  -6    0.72    0.14
   5   1  -6    0.94    0.10
   5  -1  -6    0.68    0.13
   5  -1  -6    0.61    0.14
  -5  -1   6    0.86    0.16
  -5  -1   6    1.00    0.14
  -5   1   6    0.96    0.14
  -5   1   6    0.80    0.19
  -5   1   6    0.62    0.08
  -5  -1   6    0.60    0.08
   5   1  -5    5.25    0.25
   5   1  -5    4.78    0.48
   5  -1  -5    5.24    0.48
   5  -1  -5    5.84    0.24
   5  -1  -5    5.33    0.22
   5  -1  -5    5.46    0.26
  -5  -1   5    5.55    0.23
  -5   1   5    5.18    0.29
  -5  -1   5    5.48    0.43
  -5  -1   5    4.98    0.17
  -5  -1   5    5.75    0.19
  -5   1   5    5.17    0.21
   5   1  -4    1.02    0.22
   5  -1  -4    1.25    0.12
   5  -1  -4    0.54    0.29
  -5  -1   4    1.16    0.20
  -5  -1   4    0.74    0.24
  -5   1   4    0.84    0.13
   5   1  -3  117.92    5.83
   5  -1  -3  123.57    5.25
   5  -1  -3  121.25    6.03
  -5  -1   3  127.58    5.94
  -5  -1   3  118.61    5.59
  -5   1   3  120.74    5.43
   5  -1  -2   94.16    3.76
  -5  -1   2   93.47    3.88
  -5   1   2   88.70    3.86
  -5  -1   2   87.15    4.00
   5   1  -1   23.80    0.60
   5  -1  -1   24.15    0.85
  -5  -1   1   26.83    1.02
  -5  -1   1   24.58    1.19
  -5   1   1   24.59    1.06
   5   1   0   27.21    0.82
   5  -1   0   28.04    1.00
  -5  -1   0   29.24    1.06
  -5  -1   0   27.57    1.32
  -5   1   0   26.65    1.26
   5   1   1   34.86    1.15
   5  -1   1   35.70    1.34
  -5  -1  -1   39.18    1.35
  -5  -1  -1   36.94    1.37
  -5  -1  -1   33.84    1.24
  -5   1  -1   33.83    1.55
  -5   1  -1   34.99    1.34
  -5  -1  -1   31.79    1.66
   5   1   2    0.16    0.10
   5  -1   2    0.19    0.07
   5  -1   2    0.16    0.11
  -5   1  -2    0.08    0.09
  -5  -1  -2    0.32    0.09
  -5  -1  -2    0.35    0.23
  -5  -1  -2    0.24    0.10
  -5   1  -2    0.29    0.06
  -5   1  -2    0.13    0.19
  -5   1  -2    0.27    0.14
  -5  -1  -2    0.13    0.08
   5   1   3   10.18    0.50
   5  -1   3    9.92    0.31
   5  -1   3   10.70    0.59
   5  -1   3    9.22    0.35
  -5  -1  -3    9.73    0.88
  -5  -1  -3   10.94    0.57
  -5   1  -3    9.99    0.80
  -5   1  -3   10.22    0.62
  -5   1  -3   10.03    0.44
  -5  -1  -3   10.55    0.44
   5   1   4    5.64    0.22
   5   1   4    6.61    0.40
   5  -1   4    6.15    0.26
   5  -1   4    6.94    0.48
   5  -1   4    5.26    0.25
  -5   1  -4    6.14    0.34
  -5  -1  -4    5.43    0.59
  -5  -1  -4    5.50    0.39
  -5  -1  -4    6.75    0.47
  -5   1  -4    5.48    0.67
  -5   1  -4    6.39    0.52
   5   1   5    0.79    0.10
   5   1   5    0.91    0.22
   5  -1   5    0.98    0.27
   5  -1   5    0.73    0.13
   5  -1   5    0.69    0.11
  -5  -1  -5    0.92    0.21
  -5  -1  -5    0.99    0.38
  -5  -1  -5    0.91    0.25
  -5   1  -5    0.92    0.39
  -5   1  -5    0.94    0.23
  -5   1  -5    0.82    0.18
   5   1   6    5.50    0.52
   5  -1   6    4.84    0.31
   5   1   6    4.55    0.25
   5  -1   6    4.50    0.58
  -5  -1  -6    4.98    0.45
  -5  -1  -6    5.13    0.75
  -5  -1  -6    5.10    0.44
  -5   1  -6    4.35    0.37
  -5   1  -6    4.53    0.62
  -5   1  -6    5.76    0.49
   5   1   7   25.32    0.97
   5   1   7   24.77    1.49
   5  -1   7   26.61    1.11
   5  -1   7   26.47    1.62
  -5  -1  -7   25.55    1.33
  -5  -1  -7   24.54    2.03
  -5  -1  -7   27.87    1.53
  -5   1  -7   26.23    1.98
  -5   1  -7   29.22    1.71
  -5   1  -7   25.00    1.17
   5   1   8    4.23    0.71
   5  -1   8    5.27    0.39
   5  -1   8    4.00    0.59
  -5   1  -8    4.68    0.39
  -5  -1  -8    5.26    0.53
  -5  -1  -8    4.92    0.89
  -5  -1  -8    5.09    0.52
  -5   1  -8    4.29    0.93
   5   1   9   18.14    0.77
   5  -1   9   17.58    0.83
  -5  -1  -9   16.97    0.98
  -5  -1  -9   18.09    1.21
  -5   1  -9   16.01    0.69
  -5   1  -9   17.77    1.35
   5   1  10    0.72    0.15
   5  -1  10    0.57    0.18
  -5  -1 -10    0.72    0.29
  -5   1 -10    0.74    0.33
  -5  -1 -10    0.68    0.21
   5   1  11    0.06    0.07
   5  -1  11    0.06    0.08
  -5  -1 -11    0.00    0.09
  -5  -1 -11   -0.02    0.12
  -5  -1 -11   -0.03    0.14
  -5   1 -11   -0.08    0.17
   5  -1  12    0.16    0.09
  -5  -1 -12    0.28    0.11
  -5  -1 -12    0.40    0.15
  -5   1 -12    0.11    0.14
   5   2 -17    0.19    0.14
   5  -2 -16    0.41    0.16
   5   2 -16    0.64    0.23
   5  -2 -16    0.49    0.19
  -5   2  16    0.76    0.13
   5   2 -15    0.15    0.14
   5  -2 -15    0.43    0.12
   5  -2 -15    0.10    0.13
  -5  -2  15   -0.01    0.12
  -5   2  15   -0.04    0.08
   5   2 -14   21.85    1.00
   5  -2 -14   23.74    1.27
   5  -2 -14   25.02    1.43
   5   2 -14   24.12    1.43
  -5  -2  14   22.24    0.90
  -5  -2  14   24.19    1.20
   5  -2 -13   12.52    1.53
   5   2 -13   13.41    0.67
   5   2 -13   14.00    1.04
   5  -2 -13   13.24    0.86
   5  -2 -13   15.30    0.94
   5  -2 -13   15.50    0.84
   5   2 -13   13.61    1.63
  -5  -2  13   12.56    0.56
  -5  -2  13   14.22    0.73
  -5   2  13   12.96    1.03
   5   2 -12    0.10    0.13
   5   2 -12    0.08    0.17
   5  -2 -12    0.34    0.32
   5  -2 -12    0.25    0.19
   5  -2 -12    0.16    0.14
   5  -2 -12    0.38    0.20
   5   2 -12    0.03    0.32
  -5  -2  12    0.06    0.08
  -5  -2  12    0.23    0.20
  -5   2  12    0.07    0.19
  -5   2  12    0.18    0.13
   5   2 -11   31.98    1.41
   5   2 -11   29.12    2.23
   5   2 -11   32.51    1.52
   5  -2 -11   29.95    1.95
   5  -2 -11   33.69    1.55
   5  -2 -11   35.66    1.56
   5  -2 -11   34.03    1.45
  -5  -2  11   29.13    1.77
  -5  -2  11   31.44    1.10
  -5  -2  11   33.06    1.27
  -5  -2  11   32.43    1.52
  -5   2  11   34.93    1.74
  -5   2  11   33.17    1.35
   5  -2 -10    5.28    0.82
   5   2 -10    5.69    0.79
   5   2 -10    5.81    0.40
   5   2 -10    5.86    0.54
   5  -2 -10    5.82    0.53
   5  -2 -10    5.20    0.34
   5  -2 -10    5.54    0.43
  -5  -2  10    6.21    0.64
  -5  -2  10    5.85    0.36
  -5  -2  10    5.65    0.45
  -5   2  10    5.60    0.46
  -5   2  10    5.74    0.43
  -5   2  10    5.11    0.48
  -5   2  10    5.07    0.26
  -5  -2  10    5.96    0.42
   5  -2  -9    6.60    0.29
   5   2  -9    6.95    0.41
   5   2  -9    7.95    0.56
   5  -2  -9    8.22    0.52
   5  -2  -9    7.82    0.54
  -5  -2   9    6.70    0.42
  -5  -2   9    7.37    0.67
  -5  -2   9    7.76    0.40
  -5   2   9    7.87    0.51
  -5   2   9    8.14    0.51
  -5   2   9    7.72    0.33
  -5   2   9    6.97    0.47
  -5  -2   9    7.56    0.47
   5   2  -8    8.37    0.42
   5   2  -8    8.31    0.49
   5  -2  -8    7.78    0.27
   5  -2  -8    7.96    0.49
   5  -2  -8    8.88    0.41
  -5  -2   8    8.39    0.53
  -5  -2   8    8.04    0.53
  -5  -2   8    8.14    0.41
  -5  -2   8    8.49    0.34
  -5   2   8    8.39    0.40
  -5   2   8    9.46    0.52
  -5   2   8    8.54    0.54
  -5   2   8    8.13    0.33
   5   2  -7   25.74    0.85
   5   2  -7   26.22    1.03
   5  -2  -7   25.03    0.72
   5  -2  -7   27.11    1.02
   5  -2  -7   28.64    1.11
  -5  -2   7   25.42    0.91
  -5  -2   7   25.34    1.31
  -5  -2   7   26.30    0.90
  -5   2   7   25.76    1.00
  -5   2   7   26.97    0.81
   5   2  -6    0.33    0.09
   5   2  -6    0.36    0.11
   5  -2  -6    0.34    0.12
   5  -2  -6    0.50    0.12
   5  -2  -6    0.27    0.09
  -5  -2   6    0.37    0.12
  -5  -2   6    0.29    0.10
  -5  -2   6    0.40    0.19
  -5  -2   6    0.25    0.06
  -5   2   6    0.26    0.10
   5   2  -5    3.00    0.20
   5  -2  -5    3.92    0.27
   5  -2  -5    3.59    0.21
   5  -2  -5    3.56    0.45
   5  -2  -5    3.74    0.22
  -5  -2   5    3.70    0.30
  -5  -2   5    3.01    0.15
  -5   2   5    3.32    0.22
  -5   2   5    3.04    0.15
   5   2  -4   62.26    2.77
   5  -2  -4   65.15    2.50
   5  -2  -4   63.98    2.95
  -5  -2   4   63.73    2.74
  -5   2   4   58.52    2.05
  -5   2   4   61.64    2.15
  -5  -2   4   67.51    2.89
   5   2  -3   27.12    1.27
   5  -2  -3   29.00    1.04
  -5   2   3   28.09    0.95
  -5  -2   3   27.18    1.24
  -5  -2   3   27.41    1.29
   5   2  -2    4.08    0.36
   5  -2  -2    4.00    0.28
  -5  -2   2    3.50    0.36
  -5  -2   2    3.70    0.43
  -5   2   2    3.12    0.29
   5  -2  -1    0.29    0.13
  -5  -2   1    0.33    0.20
  -5   2   1    0.34    0.15
  -5  -2   1    0.44    0.15
   5  -2   0   69.17    2.74
  -5  -2   0   65.70    2.69
  -5  -2   0   65.83    2.88
  -5   2   0   66.34    2.82
  -5   2   0   62.41    2.56
  -5  -2   0   65.93    2.51
   5   2   1   19.55    0.57
   5  -2   1   20.70    0.86
   5  -2   1   18.53    0.61
  -5  -2  -1   19.39    0.66
  -5  -2  -1   21.36    1.04
  -5   2  -1   18.87    0.81
  -5   2  -1   18.59    0.93
  -5  -2  -1   18.00    0.73
   5   2   2    0.31    0.09
   5  -2   2    0.24    0.07
   5  -2   2    0.31    0.10
   5  -2   2    0.27    0.15
  -5  -2  -2    0.29    0.10
  -5  -2  -2    0.59    0.21
  -5  -2  -2    0.35    0.13
  -5   2  -2    0.30    0.21
  -5   2  -2    0.37    0.09
  -5   2  -2    0.31    0.15
   5   2   3   27.84    1.01
   5  -2   3   26.46    1.21
   5  -2   3   27.93    0.87
   5  -2   3   26.32    0.91
  -5  -2  -3   24.48    1.01
  -5  -2  -3   27.06    1.38
  -5  -2  -3   27.96    1.10
  -5   2  -3   27.26    1.20
  -5   2  -3   26.79    1.46
  -5   2  -3   24.46    0.89
   5   2   4    0.32    0.14
   5  -2   4    0.51    0.17
   5  -2   4    0.40    0.10
   5  -2   4    0.35    0.11
  -5  -2  -4    0.27    0.24
  -5  -2  -4    0.44    0.17
  -5   2  -4    0.25    0.28
  -5   2  -4    0.34    0.21
  -5  -2  -4    0.41    0.16
  -5   2  -4    0.35    0.13
   5   2   5    2.77    0.33
   5  -2   5    3.10    0.20
   5  -2   5    2.44    0.44
   5  -2   5    2.79    0.24
  -5  -2  -5    3.26    0.30
  -5  -2  -5    3.74    0.50
  -5  -2  -5    3.84    0.30
  -5   2  -5    3.03    0.24
  -5   2  -5    3.08    0.60
  -5   2  -5    3.13    0.46
   5   2   6   -0.01    0.06
   5   2   6   -0.03    0.14
   5  -2   6    0.01    0.09
   5  -2   6    0.05    0.08
   5  -2   6    0.03    0.18
  -5  -2  -6    0.07    0.14
  -5  -2  -6    0.00    0.24
  -5  -2  -6    0.24    0.14
  -5   2  -6    0.05    0.09
  -5   2  -6    0.09    0.24
  -5   2  -6    0.25    0.15
   5   2   7    5.19    0.28
   5  -2   7    5.35    0.41
   5  -2   7    5.30    0.67
   5  -2   7    4.62    0.28
  -5  -2  -7    5.40    0.55
  -5   2  -7    4.59    0.34
  -5  -2  -7    3.79    0.86
  -5  -2  -7    5.28    0.44
  -5   2  -7    5.29    0.82
  -5   2  -7    5.49    0.66
   5   2   8    0.37    0.12
   5  -2   8    0.42    0.33
   5  -2   8    0.50    0.15
  -5  -2  -8    0.34    0.40
  -5  -2  -8    0.24    0.26
  -5   2  -8    0.58    0.41
  -5  -2  -8    0.50    0.21
   5   2   9   21.11    0.86
   5  -2   9   20.68    1.02
  -5  -2  -9   20.26    1.22
  -5  -2  -9   20.49    1.22
  -5   2  -9   22.11    1.59
   5   2  10   15.62    0.67
   5  -2  10   16.97    0.84
  -5  -2 -10   16.15    0.95
  -5  -2 -10   17.72    0.90
  -5  -2 -10   16.27    1.01
  -5   2 -10   16.54    1.31
   5  -2  11   10.92    0.54
  -5  -2 -11   10.13    0.58
  -5  -2 -11   11.26    0.61
  -5  -2 -11    9.86    0.57
  -5   2 -11   10.29    0.86
   5  -2  12    1.42    0.15
  -5   2 -12    0.91    0.30
   5  -3 -16    1.75    0.25
   5  -3 -16    1.35    0.25
   5   3 -16    2.40    0.25
  -5  -3  16    2.16    0.22
  -5   3  16    2.23    0.20
   5   3 -15    2.09    0.27
   5  -3 -15    1.12    0.29
   5  -3 -15    2.14    0.28
  -5  -3  15    1.59    0.25
  -5   3  15    1.46    0.21
   5   3 -14    2.31    0.44
   5  -3 -14    2.32    0.40
   5  -3 -14    2.23    0.38
   5  -3 -14    2.99    0.30
  -5  -3  14    2.71    0.29
   5   3 -13    1.49    0.38
   5  -3 -13    1.32    0.33
   5  -3 -13    1.53    0.34
   5  -3 -13    1.44    0.30
  -5  -3  13    1.58    0.32
   5   3 -12   19.48    0.84
   5   3 -12   21.63    1.36
   5  -3 -12   18.13    1.69
   5  -3 -12   20.84    1.17
   5  -3 -12   20.26    1.00
   5  -3 -12   20.84    1.28
   5   3 -12   18.86    1.55
  -5  -3  12   21.48    1.13
  -5   3  12   21.39    1.09
   5  -3 -11    6.27    0.43
   5   3 -11    5.19    0.91
   5   3 -11    6.11    0.64
   5   3 -11    5.89    0.38
   5  -3 -11    6.59    0.65
   5  -3 -11    4.85    0.94
   5  -3 -11    6.35    0.56
  -5  -3  11    6.39    0.38
  -5  -3  11    6.35    0.66
  -5   3  11    6.67    0.55
  -5   3  11    6.21    0.42
  -5  -3  11    5.20    0.73
   5   3 -10   81.45    4.57
   5   3 -10   83.40    3.73
   5   3 -10   86.50    4.30
   5  -3 -10   91.21    4.00
   5  -3 -10   89.07    4.46
   5  -3 -10   82.13    4.50
   5  -3 -10   90.92    4.06
  -5  -3  10   84.34    4.60
  -5  -3  10   89.35    3.98
  -5  -3  10   87.87    4.43
  -5   3  10   86.40    3.91
  -5   3  10   90.82    4.46
  -5   3  10   88.22    4.14
  -5   3  10   87.56    3.59
   5   3  -9    5.56    0.34
   5   3  -9    5.49    0.49
   5  -3  -9    5.68    0.30
   5  -3  -9    6.34    0.56
   5  -3  -9    5.74    0.47
  -5  -3   9    6.35    0.64
  -5  -3   9    5.92    0.40
  -5  -3   9    6.22    0.57
  -5   3   9    5.61    0.44
  -5   3   9    5.67    0.29
  -5   3   9    5.64    0.40
  -5   3   9    6.26    0.50
   5   3  -8   19.76    0.74
   5   3  -8   18.38    0.74
   5  -3  -8   18.69    0.61
   5  -3  -8   20.20    0.84
   5  -3  -8   19.79    0.83
  -5  -3   8   19.05    0.94
  -5  -3   8   18.18    0.64
  -5  -3   8   19.25    0.77
  -5   3   8   18.57    0.79
  -5   3   8   20.71    0.97
  -5   3   8   19.89    0.69
  -5  -3   8   19.88    1.25
   5  -3  -7   17.94    0.54
   5   3  -7   18.16    0.64
   5   3  -7   17.30    0.74
   5  -3  -7   18.81    0.82
   5  -3  -7   20.45    0.86
   5  -3  -7   19.10    0.75
  -5  -3   7   19.53    0.75
  -5  -3   7   18.86    0.99
  -5  -3   7   18.13    0.60
  -5  -3   7   18.72    0.67
  -5   3   7   19.47    0.78
  -5   3   7   19.43    0.62
   5  -3  -6    4.39    0.16
   5   3  -6    3.88    0.18
   5   3  -6    3.90    0.21
   5  -3  -6    4.44    0.25
   5  -3  -6    4.41    0.25
   5  -3  -6    4.77    0.33
  -5  -3   6    4.19    0.25
  -5  -3   6    4.43    0.46
  -5  -3   6    3.84    0.19
  -5  -3   6    3.32    0.25
  -5   3   6    3.65    0.27
  -5   3   6    4.13    0.20
   5  -3  -5   51.54    2.01
   5   3  -5   48.66    1.73
   5  -3  -5   54.44    1.97
   5  -3  -5   49.76    2.36
   5  -3  -5   52.68    1.85
  -5  -3   5   52.47    1.93
  -5  -3   5   50.50    2.31
  -5   3   5   53.36    1.87
  -5   3   5   50.60    1.82
  -5  -3   5   48.17    1.74
   5   3  -4    4.33    0.39
   5  -3  -4    4.96    0.46
   5  -3  -4    4.82    0.35
   5  -3  -4    4.90    0.19
  -5  -3   4    4.83    0.21
  -5  -3   4    5.11    0.46
  -5  -3   4    4.66    0.37
  -5   3   4    4.52    0.27
   5   3  -3    0.64    0.20
   5  -3  -3    0.73    0.07
   5  -3  -3    0.65    0.23
   5  -3  -3    0.47    0.11
   5  -3  -3    0.60    0.17
  -5  -3   3    0.57    0.10
  -5  -3   3    0.76    0.22
  -5  -3   3    0.53    0.22
  -5   3   3    0.48    0.10
   5  -3  -2  201.42   10.36
   5   3  -2  181.93    9.63
   5  -3  -2  196.28    9.53
  -5  -3   2  182.55    9.83
  -5  -3   2  174.37    9.27
  -5   3   2  193.54    9.72
   5  -3  -1  301.58   17.21
   5  -3  -1  326.37   19.69
  -5  -3   1  304.16   17.73
  -5  -3   1  310.54   19.70
  -5  -3   1  311.49   18.21
  -5   3   1  307.36   18.45
  -5   3   1  292.81   17.53
  -5  -3   1  301.83   18.68
   5  -3   0   16.27    0.58
   5  -3   0   17.30    0.80
  -5  -3   0   15.39    0.74
  -5  -3   0   16.84    0.67
  -5  -3   0   17.85    1.14
  -5  -3   0   16.43    0.63
  -5   3   0   15.75    0.74
  -5   3   0   17.28    0.79
   5  -3   1   76.50    3.33
   5  -3   1   75.75    2.76
   5  -3   1   75.89    2.89
  -5  -3  -1   75.48    2.94
  -5  -3  -1   78.94    3.90
  -5  -3  -1   76.32    2.93
  -5   3  -1   72.50    2.96
  -5   3  -1   72.12    3.27
  -5  -3  -1   70.37    2.97
   5  -3   2   11.87    0.40
   5  -3   2   11.32    0.46
   5  -3   2   11.80    0.69
  -5  -3  -2   11.76    0.50
  -5  -3  -2   11.37    0.93
  -5  -3  -2   11.59    0.55
  -5   3  -2   11.28    0.65
  -5   3  -2   11.37    0.63
   5  -3   3    4.75    0.46
   5  -3   3    4.37    0.24
   5  -3   3    4.36    0.27
  -5  -3  -3    4.19    0.34
  -5  -3  -3    4.67    0.60
  -5  -3  -3    4.90    0.33
  -5   3  -3    4.35    0.42
  -5   3  -3    5.21    0.50
  -5   3  -3    3.48    0.23
   5   3   4   10.22    0.51
   5  -3   4   10.34    0.42
   5  -3   4   10.68    0.45
   5  -3   4   10.10    0.76
  -5  -3  -4   11.69    0.96
  -5  -3  -4    9.72    0.55
  -5   3  -4    9.95    0.57
  -5   3  -4   10.35    0.86
  -5  -3  -4    9.81    0.50
   5  -3   5    8.47    0.46
   5  -3   5    8.92    0.79
   5  -3   5    8.29    0.47
  -5  -3  -5    8.90    0.63
  -5  -3  -5    8.60    0.79
  -5  -3  -5    9.17    0.56
  -5   3  -5    9.46    0.64
  -5   3  -5    9.12    0.77
   5  -3   6   13.64    1.02
   5  -3   6   13.64    0.59
   5  -3   6   13.05    0.63
  -5  -3  -6   14.33    1.27
  -5  -3  -6   13.83    0.81
  -5   3  -6   13.54    1.05
  -5   3  -6   14.09    1.03
  -5  -3  -6   13.19    0.88
   5  -3   7   34.10    1.51
   5  -3   7   34.78    2.21
   5  -3   7   32.06    1.32
  -5  -3  -7   33.86    1.83
  -5  -3  -7   33.33    1.63
  -5  -3  -7   32.04    2.08
  -5   3  -7   32.36    2.35
  -5   3  -7   35.98    2.13
   5   3   8    0.20    0.10
   5  -3   8    0.44    0.17
   5  -3   8    0.39    0.12
   5  -3   8    0.17    0.34
  -5  -3  -8    0.10    0.24
  -5  -3  -8    0.33    0.21
  -5  -3  -8    0.39    0.40
  -5   3  -8    0.92    0.33
  -5   3  -8    0.54    0.32
   5  -3   9   31.81    1.33
  -5  -3  -9   31.12    1.54
  -5  -3  -9   30.26    1.51
  -5   3  -9   34.05    2.15
  -5  -3  -9   31.27    1.62
   5  -3  10   22.35    1.02
  -5  -3 -10   21.31    1.21
  -5  -3 -10   21.65    1.13
  -5   3 -10   20.99    1.55
   5  -3  11    3.50    0.27
  -5  -3 -11    2.77    0.28
  -5  -3 -11    3.69    0.29
  -5   3 -11    3.59    0.41
   5  -3  12    1.83    0.16
  -5  -3 -12    1.60    0.20
  -5   3 -12    1.79    0.33
   5   4 -16    0.08    0.13
   5  -4 -16    0.25    0.12
  -5  -4  16    0.43    0.12
  -5   4  16    0.38    0.11
   5   4 -15    1.67    0.31
   5  -4 -15    2.30    0.31
  -5  -4  15    1.99    0.29
   5   4 -14   13.41    0.91
   5  -4 -14   14.18    0.89
   5  -4 -14   14.61    0.74
   5  -4 -14   14.22    0.79
  -5  -4  14   14.90    0.87
   5   4 -13    2.89    0.44
   5  -4 -13    2.82    0.38
   5  -4 -13    2.66    0.45
   5  -4 -13    3.17    0.36
  -5  -4  13    2.99    0.34
   5   4 -12   28.94    2.40
   5   4 -12   33.29    1.80
   5  -4 -12   35.78    1.65
   5  -4 -12   35.03    1.89
   5  -4 -12   31.96    2.21
   5  -4 -12   35.57    1.68
  -5  -4  12   34.51    1.90
  -5   4  12   34.33    1.84
   5   4 -11    1.68    0.32
   5  -4 -11    1.28    0.23
   5  -4 -11    0.50    0.51
   5  -4 -11    1.54    0.29
   5  -4 -11    1.36    0.27
   5   4 -11    0.75    0.48
  -5  -4  11    0.83    0.45
  -5  -4  11    1.17    0.20
  -5  -4  11    1.53    0.29
  -5   4  11    1.06    0.31
   5   4 -10    8.70    0.97
   5   4 -10    8.91    0.58
   5  -4 -10    9.61    0.50
   5  -4 -10   10.62    0.79
   5  -4 -10    9.06    1.10
   5  -4 -10   10.08    0.52
  -5  -4  10    9.70    0.93
  -5  -4  10   10.37    0.57
  -5  -4  10    9.34    0.64
  -5   4  10    9.34    0.48
  -5   4  10   10.71    0.73
  -5   4  10    9.46    0.55
  -5   4  10    9.67    0.36
   5   4  -9   11.97    0.51
   5   4  -9   10.86    1.04
   5   4  -9   11.61    0.71
   5  -4  -9   13.01    0.47
   5  -4  -9   13.59    0.83
   5  -4  -9   12.53    1.12
   5  -4  -9   13.51    0.65
  -5  -4   9   12.74    0.87
  -5  -4   9   13.63    0.60
  -5  -4   9   12.81    0.72
  -5   4   9   11.64    0.56
  -5   4   9   12.65    0.69
  -5   4   9   13.18    0.67
  -5   4   9   12.16    0.47
  -5  -4   9   11.75    0.50
   5   4  -8    0.18    0.10
   5   4  -8    0.41    0.15
   5  -4  -8    0.34    0.09
   5  -4  -8    0.68    0.16
   5  -4  -8    0.24    0.14
  -5  -4   8    0.35    0.11
  -5  -4   8    0.24    0.26
  -5  -4   8    0.50    0.15
  -5  -4   8    0.32    0.20
  -5   4   8    0.36    0.14
  -5   4   8    0.36    0.09
   5   4  -7   29.34    1.01
   5   4  -7   30.34    1.19
   5  -4  -7   31.04    1.02
   5  -4  -7   32.60    1.37
   5  -4  -7   33.11    1.47
   5  -4  -7   31.77    1.10
  -5  -4   7   31.71    1.23
  -5  -4   7   30.14    1.01
  -5  -4   7   29.12    1.73
  -5  -4   7   31.42    1.25
  -5   4   7   30.54    1.17
  -5   4   7   31.25    1.16
   5   4  -6   96.73    3.95
   5   4  -6   90.72    3.86
   5  -4  -6   98.21    4.33
   5  -4  -6  105.52    4.79
   5  -4  -6   99.83    3.87
   5  -4  -6   99.17    4.01
  -5  -4   6   97.74    4.11
  -5  -4   6   95.45    4.70
  -5  -4   6   95.44    3.96
  -5  -4   6   99.93    4.18
  -5   4   6   98.80    4.20
  -5   4   6   92.86    3.84
   5   4  -5   10.60    0.40
   5  -4  -5   11.30    0.36
   5  -4  -5   10.79    0.31
   5  -4  -5   11.47    0.63
   5  -4  -5   12.21    0.49
   5  -4  -5   11.35    0.42
   5  -4  -5   10.89    0.76
  -5  -4   5   11.38    0.70
  -5  -4   5   10.55    0.41
  -5  -4   5   11.01    0.42
  -5   4   5   11.10    0.48
  -5  -4   5   12.31    0.49
   5  -4  -4    0.04    0.14
   5  -4  -4    0.06    0.05
   5  -4  -4    0.09    0.07
   5  -4  -4   -0.07    0.12
   5  -4  -4   -0.01    0.06
  -5  -4   4    0.04    0.17
  -5  -4   4    0.05    0.15
  -5  -4   4    0.09    0.06
  -5  -4   4    0.04    0.07
  -5   4   4    0.08    0.09
  -5  -4   4    0.12    0.07
   5   4  -3    5.32    0.38
   5  -4  -3    4.51    0.41
   5  -4  -3    4.32    0.19
   5  -4  -3    5.63    0.45
   5  -4  -3    4.64    0.25
   5  -4  -3    4.10    0.20
  -5  -4   3    3.93    0.26
  -5  -4   3    4.80    0.26
  -5  -4   3    4.93    0.49
  -5  -4   3    4.95    0.19
  -5  -4   3    5.55    0.55
   5   4  -2  197.67   10.44
   5  -4  -2  185.13    8.88
   5  -4  -2  201.45   10.76
   5  -4  -2  201.86    9.96
  -5  -4   2  179.96   10.05
  -5  -4   2  195.41   11.17
  -5  -4   2  180.45    9.06
  -5  -4   2  201.82   10.18
  -5   4   2  189.04    9.68
  -5   4   2  191.56    9.67
  -5  -4   2  201.61   10.15
   5   4  -1   56.36    2.38
   5  -4  -1   58.90    2.01
   5  -4  -1   57.80    1.91
   5  -4  -1   57.00    2.07
   5  -4  -1   58.96    2.58
  -5  -4   1   57.54    2.20
  -5  -4   1   57.02    2.17
  -5  -4   1   56.97    2.93
  -5   4   1   53.92    2.20
  -5   4   1   56.92    2.29
  -5  -4   1   50.04    2.22
   5  -4   0    2.41    0.16
   5  -4   0    2.30    0.11
   5  -4   0    2.81    0.20
   5  -4   0    3.29    0.36
  -5  -4   0    3.06    0.42
  -5  -4   0    2.23    0.32
  -5  -4   0    2.62    0.25
  -5  -4   0    2.55    0.19
  -5   4   0    2.55    0.26
  -5   4   0    2.65    0.27
   5  -4   1   28.16    0.92
   5  -4   1   23.73    0.66
   5  -4   1   27.15    0.91
   5  -4   1   29.24    1.20
  -5  -4  -1   25.33    1.13
  -5  -4  -1   27.22    0.97
  -5  -4  -1   27.22    1.55
  -5  -4  -1   28.18    1.05
  -5   4  -1   26.20    1.13
  -5   4  -1   26.81    1.25
   5  -4   2   -0.00    0.13
   5  -4   2   -0.00    0.05
   5  -4   2    0.06    0.06
  -5  -4  -2    0.04    0.11
  -5  -4  -2    0.10    0.09
  -5  -4  -2    0.03    0.14
  -5   4  -2   -0.00    0.12
  -5   4  -2   -0.03    0.14
   5  -4   3    3.97    0.37
   5  -4   3    3.03    0.24
   5  -4   3    3.17    0.29
  -5  -4  -3    3.79    0.45
  -5  -4  -3    3.53    0.27
  -5  -4  -3    3.35    0.35
  -5   4  -3    3.65    0.34
  -5   4  -3    3.49    0.49
   5  -4   4   16.98    0.71
   5  -4   4   16.80    1.11
   5  -4   4   17.55    0.77
  -5  -4  -4   17.04    0.84
  -5  -4  -4   16.67    0.81
  -5  -4  -4   16.74    1.22
  -5   4  -4   16.34    1.19
  -5   4  -4   16.35    1.00
   5  -4   5    0.18    0.10
   5  -4   5    0.07    0.22
   5  -4   5    0.10    0.13
  -5  -4  -5    0.16    0.18
  -5  -4  -5    0.30    0.26
  -5  -4  -5    0.08    0.16
  -5  -4  -5    0.07    0.12
  -5   4  -5    0.22    0.20
  -5   4  -5   -0.01    0.24
   5  -4   6    4.26    0.64
   5  -4   6    3.80    0.35
   5  -4   6    4.21    0.37
  -5  -4  -6    4.54    0.50
  -5  -4  -6    2.92    0.72
  -5  -4  -6    4.54    0.45
  -5   4  -6    4.36    0.59
  -5   4  -6    3.98    0.73
   5  -4   7   21.50    1.02
   5  -4   7   19.46    1.55
   5  -4   7   19.56    0.91
  -5  -4  -7   20.40    1.25
  -5  -4  -7   19.39    1.70
  -5  -4  -7   21.65    1.15
  -5   4  -7   18.12    1.75
  -5   4  -7   21.17    1.44
   5  -4   8   13.97    1.28
   5  -4   8   14.49    0.67
   5  -4   8   14.17    0.63
  -5  -4  -8   13.36    1.51
  -5  -4  -8   13.70    0.96
  -5  -4  -8   14.96    0.86
  -5   4  -8   13.42    1.46
  -5   4  -8   15.12    1.00
   5  -4   9    1.33    0.20
   5  -4   9    0.93    0.16
  -5  -4  -9    1.09    0.27
  -5   4  -9    1.16    0.32
  -5  -4  -9    1.14    0.26
   5  -4  10   10.58    0.58
  -5  -4 -10   10.23    0.73
  -5  -4 -10   10.15    0.63
  -5   4 -10   11.59    0.90
   5  -4  11    3.67    0.27
  -5  -4 -11    3.38    0.33
  -5   4 -11    3.30    0.45
  -5   4 -12   11.73    0.62
   5   5 -16    5.94    0.39
   5  -5 -16    6.22    0.41
  -5  -5  16    6.38    0.36
  -5   5  16    6.12    0.32
   5   5 -15    1.25    0.24
   5  -5 -15    1.43    0.25
  -5  -5  15    1.07    0.23
   5   5 -14    5.29    0.50
   5  -5 -14    5.53    0.55
   5  -5 -14    6.64    0.44
  -5  -5  14    6.00    0.54
   5   5 -13    1.78    0.32
   5  -5 -13    1.98    0.39
   5  -5 -13    1.53    0.27
   5  -5 -13    2.21    0.26
  -5  -5  13    2.10    0.36
   5   5 -12    1.24    0.30
   5  -5 -12    2.29    0.63
   5  -5 -12    1.10    0.33
   5  -5 -12    1.24    0.24
   5  -5 -12    1.04    0.24
  -5  -5  12    1.34    0.27
  -5   5  12    0.86    0.32
   5   5 -11    5.68    0.96
   5   5 -11    6.43    0.57
   5  -5 -11    7.41    0.80
   5  -5 -11    7.34    0.48
   5  -5 -11    6.38    0.66
   5  -5 -11    7.16    0.47
  -5  -5  11    6.70    0.56
  -5  -5  11    6.67    0.42
  -5   5  11    6.29    0.63
  -5  -5  11    4.03    0.92
   5   5 -10    2.40    0.48
   5   5 -10    1.74    0.30
   5  -5 -10    1.76    0.20
   5  -5 -10    1.24    0.54
   5  -5 -10    1.60    0.25
   5  -5 -10    1.71    0.30
  -5  -5  10    1.46    0.50
  -5  -5  10    1.55    0.26
  -5  -5  10    1.44    0.37
  -5   5  10    1.89    0.29
  -5   5  10    1.56    0.26
  -5   5  10    1.51    0.14
   5   5  -9    4.03    0.59
   5   5  -9    3.00    0.31
   5  -5  -9    4.62    0.43
   5  -5  -9    3.85    0.28
   5  -5  -9    3.92    0.31
   5  -5  -9    3.52    0.65
  -5  -5   9    3.59    0.61
  -5  -5   9    3.52    0.28
  -5  -5   9    3.28    0.36
  -5  -5   9    4.17    0.38
  -5   5   9    3.52    0.23
  -5   5   9    4.73    0.45
   5   5  -8   13.69    1.00
   5   5  -8   13.49    0.66
   5  -5  -8   15.20    0.83
   5  -5  -8   16.03    0.65
   5  -5  -8   15.19    0.73
   5  -5  -8   14.86    0.50
  -5  -5   8   14.55    0.95
  -5  -5   8   15.07    0.66
  -5  -5   8   14.56    0.73
  -5   5   8   14.12    0.51
  -5   5   8   13.74    0.60
  -5  -5   8   14.04    0.64
   5   5  -7    0.68    0.15
   5  -5  -7    0.75    0.25
   5  -5  -7    0.87    0.13
   5  -5  -7    0.67    0.14
   5  -5  -7    0.72    0.20
  -5  -5   7    0.69    0.33
  -5  -5   7    0.65    0.15
  -5  -5   7    0.77    0.19
  -5  -5   7    0.76    0.21
  -5   5   7    0.73    0.15
  -5   5   7    0.83    0.17
   5   5  -6    5.85    0.25
   5   5  -6    5.70    0.30
   5  -5  -6    6.51    0.53
   5  -5  -6    6.01    0.26
   5  -5  -6    6.67    0.19
   5  -5  -6    6.03    0.31
   5  -5  -6    6.22    0.39
  -5  -5   6    5.33    0.67
  -5  -5   6    5.57    0.32
  -5  -5   6    5.96    0.39
  -5  -5   6    6.04    0.40
  -5   5   6    6.19    0.34
   5   5  -5    0.68    0.10
   5  -5  -5    0.74    0.13
   5  -5  -5    0.73    0.11
   5  -5  -5    0.58    0.11
   5  -5  -5    0.71    0.23
   5  -5  -5    0.55    0.10
   5  -5  -5    0.80    0.24
  -5  -5   5    0.83    0.14
  -5  -5   5    0.96    0.16
  -5  -5   5    0.56    0.14
  -5   5   5    0.60    0.15
  -5  -5   5    0.46    0.29
   5  -5  -4   59.20    2.04
   5  -5  -4   60.36    2.21
   5  -5  -4   56.42    2.02
   5  -5  -4   59.40    2.64
   5  -5  -4   55.82    1.85
   5  -5  -4   60.68    2.73
  -5  -5   4   55.85    2.08
  -5  -5   4   58.06    2.23
  -5  -5   4   53.69    2.63
  -5  -5   4   55.50    2.16
   5  -5  -3   10.44    0.39
   5  -5  -3   10.47    0.44
   5  -5  -3   10.42    0.38
   5  -5  -3    9.60    0.64
   5  -5  -3   10.78    0.71
   5  -5  -3   10.67    0.37
  -5  -5   3    9.69    0.36
  -5  -5   3    9.58    0.64
  -5  -5   3    9.69    0.45
  -5  -5   3    9.98    0.45
  -5  -5   3   10.68    0.87
   5   5  -2    8.59    0.48
   5  -5  -2    8.82    0.29
   5  -5  -2    8.31    0.63
   5  -5  -2    9.07    0.39
   5  -5  -2    7.85    0.30
  -5  -5   2    7.89    0.63
  -5  -5   2    8.75    0.42
  -5  -5   2    8.74    0.81
  -5  -5   2    8.55    0.42
  -5  -5   2    7.92    0.33
   5   5  -1   44.45    1.77
   5  -5  -1   48.29    1.57
   5  -5  -1   46.47    1.66
   5  -5  -1   44.55    1.44
   5  -5  -1   49.93    2.05
  -5  -5   1   48.23    1.79
  -5  -5   1   47.63    2.53
  -5  -5   1   47.88    1.81
  -5  -5   1   42.09    1.50
  -5   5   1   44.81    1.75
  -5   5   1   46.73    1.82
  -5  -5   1   40.76    1.94
   5   5   0    5.75    0.35
   5  -5   0    5.72    0.24
   5  -5   0    5.81    0.32
   5  -5   0    6.18    0.46
   5  -5   0    5.24    0.20
  -5  -5   0    5.11    0.48
  -5  -5   0    5.86    0.30
  -5  -5   0    6.44    0.66
  -5  -5   0    6.04    0.36
  -5  -5   0    5.08    0.26
  -5   5   0    5.71    0.41
  -5   5   0    5.66    0.39
   5  -5   1  179.36    8.66
   5  -5   1  160.82    7.41
   5  -5   1  167.00    8.02
   5  -5   1  181.03    9.50
  -5  -5  -1  168.33    8.32
  -5  -5  -1  158.18    8.47
  -5  -5  -1  179.67    8.99
  -5  -5  -1  159.39    8.85
  -5   5  -1  163.30    8.45
  -5   5  -1  171.40    9.01
   5  -5   2   21.04    1.30
   5  -5   2   20.53    0.80
   5  -5   2   19.83    0.55
   5  -5   2   20.69    0.88
  -5  -5  -2   21.91    0.90
  -5  -5  -2   20.15    1.21
  -5  -5  -2   21.72    0.87
  -5   5  -2   19.90    0.96
  -5   5  -2   20.65    1.16
   5  -5   3   10.57    0.50
   5  -5   3   10.50    0.83
   5  -5   3   10.08    0.49
  -5  -5  -3    9.40    0.97
  -5  -5  -3   10.21    0.61
  -5   5  -3   10.29    0.73
  -5   5  -3   10.12    0.82
  -5  -5  -3   11.68    0.68
   5  -5   4   12.63    0.82
   5  -5   4   12.49    0.62
   5  -5   4   12.57    0.68
  -5  -5  -4   11.90    0.67
  -5  -5  -4   12.74    0.72
  -5  -5  -4   12.42    1.12
  -5   5  -4   12.48    0.73
  -5   5  -4   12.72    0.99
   5  -5   5    1.11    0.22
   5  -5   5    1.14    0.40
   5  -5   5    1.02    0.25
  -5  -5  -5    0.88    0.31
  -5  -5  -5    1.29    0.26
  -5  -5  -5    1.08    0.38
  -5   5  -5    1.43    0.35
  -5   5  -5    1.10    0.43
   5  -5   6    4.43    0.53
   5  -5   6    4.09    0.32
   5  -5   6    4.16    0.40
  -5  -5  -6    4.13    0.78
  -5  -5  -6    4.05    0.52
  -5  -5  -6    3.82    0.44
  -5   5  -6    4.09    0.61
  -5   5  -6    3.07    0.69
   5  -5   7   11.61    0.69
   5  -5   7    9.92    0.94
   5  -5   7   11.65    0.66
  -5  -5  -7   12.17    1.26
  -5  -5  -7   11.14    0.74
  -5   5  -7   11.98    0.83
  -5   5  -7   10.80    1.24
  -5  -5  -7   11.70    0.86
   5  -5   8    0.13    0.13
   5  -5   8    0.06    0.11
  -5  -5  -8    0.17    0.14
  -5  -5  -8    0.06    0.15
  -5   5  -8   -0.01    0.17
   5  -5   9    3.30    0.37
   5  -5   9    3.52    0.27
  -5  -5  -9    4.34    0.48
  -5  -5  -9    3.88    0.29
  -5   5  -9    3.85    0.44
   5  -5  10    5.35    0.32
  -5  -5 -10    4.78    0.40
  -5  -5 -10    5.05    0.35
  -5   5 -10    5.07    0.47
   5  -5  11    0.55    0.11
  -5  -5 -11    0.74    0.18
  -5   5 -11    0.71    0.19
   5  -6 -16    0.46    0.15
   5   6 -15    0.02    0.08
   5  -6 -15   -0.04    0.08
   5  -6 -15   -0.05    0.11
  -5  -6  15   -0.00    0.10
   5   6 -14    4.18    0.38
   5  -6 -14    4.40    0.44
   5  -6 -14    4.53    0.48
  -5  -6  14    3.84    0.41
   5   6 -13    1.94    0.33
   5  -6 -13    2.13    0.31
   5  -6 -13    2.59    0.43
  -5  -6  13    3.15    0.31
   5   6 -12    0.59    0.20
   5  -6 -12    0.62    0.20
   5  -6 -12    0.66    0.27
  -5  -6  12    0.77    0.26
   5   6 -11    3.16    0.41
   5  -6 -11    3.73    0.30
   5  -6 -11    3.45    0.39
   5  -6 -11    4.40    0.83
  -5  -6  11    3.88    0.34
  -5  -6  11    3.26    0.51
  -5   6  11    3.80    0.49
   5   6 -10   18.74    0.98
   5  -6 -10   22.00    1.22
   5  -6 -10   20.74    0.96
   5  -6 -10   19.73    1.55
  -5  -6  10   21.62    1.08
  -5  -6  10   20.89    1.01
  -5   6  10   19.97    0.68
  -5   6  10   20.12    1.11
  -5  -6  10   18.91    1.61
   5   6  -9    9.19    0.56
   5  -6  -9    9.63    1.03
   5  -6  -9    9.13    0.72
   5  -6  -9   10.58    0.52
  -5  -6   9   10.66    1.04
  -5  -6   9   10.10    0.65
  -5  -6   9    9.33    0.53
  -5  -6   9    9.58    0.74
  -5   6   9   10.54    0.76
  -5   6   9   10.51    0.46
   5   6  -8   14.80    0.70
   5  -6  -8   17.58    0.89
   5  -6  -8   16.77    1.25
   5  -6  -8   17.23    0.97
   5  -6  -8   17.73    0.71
  -5  -6   8   16.97    0.88
  -5  -6   8   16.34    0.68
  -5  -6   8   16.37    0.92
  -5   6   8   16.98    0.74
  -5  -6   8   16.48    1.30
   5   6  -7    0.06    0.08
   5  -6  -7    0.07    0.12
   5  -6  -7   -0.03    0.13
   5  -6  -7    0.14    0.07
  -5  -6   7    0.06    0.23
  -5  -6   7    0.08    0.13
  -5  -6   7    0.02    0.13
  -5   6   7   -0.00    0.09
  -5  -6   7    0.19    0.11
   5   6  -6    0.72    0.13
   5  -6  -6    1.10    0.14
   5  -6  -6    1.07    0.16
   5  -6  -6    0.83    0.30
   5  -6  -6    0.99    0.18
   5  -6  -6    1.00    0.13
  -5  -6   6    1.15    0.39
  -5  -6   6    1.13    0.22
  -5  -6   6    1.08    0.19
  -5  -6   6    1.25    0.17
  -5   6   6    0.97    0.17
   5  -6  -5   21.82    0.68
   5  -6  -5   21.49    0.76
   5  -6  -5   22.05    0.73
   5  -6  -5   20.54    0.78
   5  -6  -5   21.13    1.14
  -5  -6   5   20.86    0.83
  -5  -6   5   19.91    0.86
  -5  -6   5   21.66    0.84
  -5   6   5   21.38    0.83
  -5  -6   5   20.15    1.20
   5  -6  -4    3.41    0.21
   5  -6  -4    3.23    0.38
   5  -6  -4    3.42    0.23
   5  -6  -4    3.63    0.21
   5  -6  -4    4.18    0.37
   5  -6  -4    3.33    0.19
  -5  -6   4    3.43    0.23
  -5  -6   4    3.71    0.53
  -5  -6   4    3.85    0.32
  -5  -6   4    3.52    0.24
   5  -6  -3   64.31    2.34
   5  -6  -3   65.50    2.48
   5  -6  -3   63.34    2.79
   5  -6  -3   66.99    2.97
   5  -6  -3   61.52    2.24
   5  -6  -3   67.20    2.55
  -5  -6   3   58.64    3.01
  -5  -6   3   63.70    2.57
  -5  -6   3   64.63    2.60
  -5  -6   3   62.82    2.44
  -5  -6   3   65.59    3.20
   5  -6  -2    1.57    0.15
   5  -6  -2    1.27    0.13
   5  -6  -2    1.43    0.14
   5  -6  -2    1.32    0.36
   5  -6  -2    1.59    0.17
  -5  -6   2    1.23    0.29
  -5  -6   2    1.40    0.19
  -5  -6   2    1.50    0.36
  -5  -6   2    1.88    0.17
  -5  -6   2    1.50    0.15
   5  -6  -1   60.12    2.28
   5  -6  -1   58.19    2.05
   5  -6  -1   60.65    2.25
   5  -6  -1   61.96    2.91
  -5  -6   1   53.88    2.68
  -5  -6   1   60.76    2.35
  -5  -6   1   58.73    3.13
  -5  -6   1   53.80    2.08
  -5  -6   1   62.23    2.47
  -5   6   1   55.32    2.23
  -5   6   1   58.82    2.35
   5  -6   0    1.41    0.12
   5  -6   0    1.44    0.18
   5  -6   0    1.30    0.10
   5  -6   0    1.78    0.19
   5  -6   0    1.86    0.36
  -5  -6   0    1.74    0.22
  -5  -6   0    1.38    0.43
  -5  -6   0    1.33    0.15
  -5  -6   0    1.67    0.22
  -5   6   0    2.10    0.23
  -5   6   0    1.46    0.24
  -5  -6   0    1.58    0.33
   5  -6   1   18.92    0.56
   5  -6   1   19.16    0.59
   5  -6   1   20.44    0.79
   5  -6   1   19.92    0.83
   5  -6   1   19.13    1.04
  -5  -6  -1   20.07    0.91
  -5  -6  -1   18.25    0.97
  -5  -6  -1   18.36    1.31
  -5  -6  -1   20.33    0.92
  -5   6  -1   18.12    0.86
  -5   6  -1   20.69    1.05
   5  -6   2    5.63    0.20
   5  -6   2    6.55    0.38
   5  -6   2    6.00    0.21
   5  -6   2    6.23    0.36
   5  -6   2    6.82    0.70
  -5  -6  -2    7.15    0.50
  -5  -6  -2    6.09    0.46
  -5   6  -2    5.73    0.50
  -5   6  -2    7.00    0.50
  -5  -6  -2    5.68    0.78
   5  -6   3   41.78    1.84
   5  -6   3   42.11    1.73
   5  -6   3   42.89    2.36
  -5  -6  -3   40.39    1.81
  -5  -6  -3   44.17    2.02
  -5  -6  -3   37.74    2.39
  -5   6  -3   39.60    1.91
  -5   6  -3   43.27    2.27
   5  -6   4    9.04    0.87
   5  -6   4    9.45    0.47
   5  -6   4    9.40    0.61
  -5  -6  -4    9.20    0.69
  -5  -6  -4    8.86    0.82
  -5  -6  -4    8.98    0.53
  -5   6  -4    8.73    0.75
  -5   6  -4    9.01    0.73
   5  -6   5    1.87    0.52
   5  -6   5    2.04    0.31
   5  -6   5    2.57    0.33
  -5  -6  -5    2.12    0.31
  -5  -6  -5    1.73    0.65
  -5  -6  -5    2.03    0.34
  -5   6  -5    2.60    0.43
  -5   6  -5    2.12    0.46
   5  -6   6    0.06    0.27
   5  -6   6    0.14    0.16
   5  -6   6    0.18    0.17
  -5  -6  -6   -0.03    0.17
  -5  -6  -6    0.30    0.33
  -5  -6  -6    0.34    0.13
  -5   6  -6    0.08    0.24
  -5   6  -6    0.18    0.30
   5  -6   7    7.70    0.89
   5  -6   7    7.24    0.44
   5  -6   7    6.32    0.51
  -5  -6  -7    4.67    1.07
  -5  -6  -7    7.45    0.53
  -5   6  -7    5.53    1.04
  -5   6  -7    6.83    0.69
  -5  -6  -7    6.59    0.60
   5  -6   8   16.07    0.75
[truncated: 328,022 more chars]
